# Supplementary material for: Transcription factor activity and nucleosome organization in mitosis
Source: HighWire-hosted journal article supplement (doi:10.1101/gr.243048.118), 2019-01-17
Supplement: Supplemental_Table_S1.xlsx [file Supplemental_Table_S1.xlsx]

## Sheet: ChipSamples
Overview of ChIP-seq, MNase-Seq, MNase H3 ChIP-seq, ATAC-seq, RNA-seq libraries sequenced in this study.
Category	Chip	AM	Fix	Barcode	SampleName	Readlength	Total Reads	Mapped/Filter/BarcodeCollapsed Reads	AlignmentRate	DuplicationRate
2i	Pou5f1	A	DSGPFA	1	oct4_A_2i_DSG	50	29014538	16323769	0.562607	0.0173685
2i	Pou5f1	M	DSGPFA	1	oct4_M_2i_DSG	50	19898103	3935541	0.197785	0.0341727
2i	Sox2	A	DSGPFA	1	sox2_A_2i_DSG	50	20162220	3654115	0.181236	0.131701
2i	Sox2	M	DSGPFA	1	sox2_M_2i_DSG	50	23175915	12450922	0.537235	0.00162012
Add	Pou5f1	A	DSGPFA	0	PN_Anti-Oct4_Asy_K160	65	29646374	18089427	0.610173	0.0692503
Add	Pou5f1	A	DSGPFA	0	PN_Anti-Oct4_Asy_R2	65	33449641	21535579	0.643821	0.423625
Add	Pou5f1	M	DSGPFA	0	PN_Anti-Oct4_Mito_K161	65	24170808	15048787	0.622602	0.0403164
Add	Pou5f1	M	DSGPFA	0	PN_Anti-Oct4_Mito_R2	65	28099856	16589504	0.590377	0.739586
Add	Sox2	A	DSGPFA	0	Sox2-IP-R1A	65	51242144	34557411	0.674394	0.0579913
Add	Sox2	A	DSGPFA	0	Sox2-IP-R3A	65	50738683	33049089	0.651359	0.0580361
Add	Sox2	A	DSGPFA	0	NF_sample9_index7	65	59020040	39274491	0.665443	0.604571
Add	Sox2	M	DSGPFA	0	Sox2-IP-R1M	65	59740008	37877287	0.634036	0.0346511
Add	Sox2	M	DSGPFA	0	Sox2-IP-R3M	65	39082334	22905135	0.586074	0.0539262
Add	Sox2	M	DSGPFA	0	NF_sample10_index12	65	58118407	34670900	0.596556	0.119725
Primary	Esrrb	A	DSGPFA	1	Esrrb_A_DSG_R1	75	48437190	29833300	0.615917	0.0273919
Primary	Esrrb	A	DSGPFA	1	Esrrb_A_DSG_R2	75	51163877	30174987	0.589771	0.0340462
Primary	Esrrb	A	PFA	1	Esrrb_A_PFA_R1	75	42965768	17400573	0.404987	0.0169239
Primary	Esrrb	A	PFA	1	Esrrb_A_PFA_R2	75	45143395	24482886	0.542336	0.0135594
Primary	Esrrb	M	DSGPFA	1	Esrrb_M_DSG_R1	75	44437551	25930289	0.583522	0.0125696
Primary	Esrrb	M	DSGPFA	1	Esrrb_M_DSG_R2	75	38977894	18493774	0.474468	0.0173554
Primary	Esrrb	M	PFA	1	Esrrb_M_PFA_R1	75	40352452	21901908	0.542765	0.0159919
Primary	Esrrb	M	PFA	1	Esrrb_M_PFA_R2	75	39845640	21295914	0.53446	0.0163852
Primary	Input	A	PFA	1	Input_A_PFA	55	20910726	10935013	0.522938	0.0155736
Primary	Input	A	DSGPFA	1	Input_A_DSGPFA	55	26388337	12022056	0.455582	0.016984
Primary	Input	A	DSGPFA	0	input-R1-A	65	77230554	50497858	0.653859	0.019715
Primary	Input	A	DSGPFA	0	input-R2A	65	39437895	25603416	0.649208	0.0190914
Primary	Input	A	DSGPFA	0	input-R3A	65	74890842	48015141	0.641135	0.0600585
Primary	Input	M	PFA	1	Input_M_PFA	55	39893820	23199653	0.581535	0.0144004
Primary	Input	M	DSGPFA	1	Input_M_DSGPFA	55	41620729	21995627	0.528478	0.0129676
Primary	Input	M	DSGPFA	0	input-R1M	65	123720314	78231018	0.632322	0.0375769
Primary	Input	M	DSGPFA	0	input-R2M	65	118525340	69965512	0.5903	0.0239178
Primary	Input	M	DSGPFA	0	input-R3M	65	79246326	49052038	0.618982	0.0237609
Primary	Nanog	A	PFA	1	Sample_PFA_Asy_Nanog	75	26595648	14614367	0.549502	0.0158887
Primary	Nanog	A	DSGPFA	1	Sample_DSG_Asy_Nanog	75	29388730	14596250	0.496661	0.0506809
Primary	Nanog	A	DSGPFA	0	NF_sample7_index5	65	59306492	39301981	0.662693	0.748693
Primary	Nanog	M	PFA	1	Sample_PFA_Mito_Nanog	75	18712049	8766462	0.468493	0.00921421
Primary	Nanog	M	DSGPFA	1	Sample_DSG_Mito_Nanog	75	35170606	13583332	0.386213	0.0192654
Primary	Nanog	M	DSGPFA	0	NF_sample8_index6	65	57315144	36745896	0.64112	0.1827
Primary	Pou5f1	A	DSGPFA	0	PN_Anti-Oct4_Asy_R1	65	30626861	19345190	0.631641	0.378454
Primary	Pou5f1	A	PFA	1	Sample_PFA_Asy_Pou5f1	75	22446941	11876555	0.529095	0.00648109
Primary	Pou5f1	A	DSGPFA	1	Sample_DSG_Asy_Pou5f1	75	31141799	15936066	0.511726	0.0202162
Primary	Pou5f1	M	DSGPFA	0	PN_Anti-Oct4_Mito_R1	65	25188651	15165026	0.602058	0.124627
Primary	Pou5f1	M	PFA	1	Sample_PFA_Mito_Pou5f1	75	26624741	13807438	0.518594	0.00764161
Primary	Pou5f1	M	DSGPFA	1	Sample_DSG_Mito_Pou5f1	75	23782080	11721971	0.492891	0.00651947
Primary	Sox2	A	DSGPFA	0	Sox2-IP-R2A	65	59650083	40143999	0.672992	0.0578421
Primary	Sox2	A	PFA	1	Sample_PFA_Asy_Sox2	75	23830844	12738445	0.534536	0.0122341
Primary	Sox2	A	DSGPFA	1	Sample_DSG_Asy_Sox2	75	25669509	13774951	0.536627	0.0291242
Primary	Sox2	M	DSGPFA	0	Sox2-IP-R2M	65	54560203	33274867	0.609874	0.0291193
Primary	Sox2	M	PFA	1	Sample_PFA_Mito_Sox2	75	27576691	13971809	0.506653	0.0291242
Primary	Sox2	M	DSGPFA	1	Sample_DSG_Mito_Sox2	75	23619975	9452872	0.400207	0.00763948
Titration	Sox2	A	DSGPFA	0	S100	65	53831982	35952165	0.667859	0.718067
Titration	Sox2	A	DSGPFA	0	S50	65	53477646	35052532	0.655461	0.337862
Titration	Sox2	A	DSGPFA	0	S20	65	47967886	31785948	0.662651	0.815153
Titration	Sox2	A	DSGPFA	0	S10	65	57173985	37049397	0.648011	0.221472
Titration	Sox2	A	DSGPFA	0	S5	65	42363383	27649262	0.652669	0.832691
Titration	Sox2	A	DSGPFA	0	S0	65	57307949	34212908	0.597001	0.742142
															ctcf_smc1	Input	A	PFA
															ctcf_smc1	Input	M	PFA
															ctcf_smc1	Input	A	DSGPFA
															ctcf_smc1	Input	M	DSGPFA
															nanog_sox	Nanog	A	DSGPFA	NF_sample7_index5	0.748693
															nanog_sox	Nanog	M	DSGPFA	NF_sample8_index6	0.1827
															nanog_sox	Sox2	A	DSGPFA	NF_sample9_index7	0.604571
															nanog_sox	Sox2	M	DSGPFA	NF_sample10_index12	0.119725
															esrrb_dsg_fa	Esrrb	A	PFA	Esrrb_A_FA_R1	0.0169239
															esrrb_dsg_fa	Esrrb	M	PFA	Esrrb_M_FA_R1	0.0159919
															esrrb_dsg_fa	Esrrb	A	DSGPFA	Esrrb_A_DSG_R1	0.0273919
															esrrb_dsg_fa	Esrrb	M	DSGPFA	Esrrb_M_DSG_R1	0.0125696
															esrrb_dsg_fa	Esrrb	A	PFA	Esrrb_A_FA_R2	0.0135594
															esrrb_dsg_fa	Esrrb	M	PFA	Esrrb_M_FA_R2	0.0163852
															esrrb_dsg_fa	Esrrb	A	DSGPFA	Esrrb_A_DSG_R2	0.0340462
															esrrb_dsg_fa	Esrrb	M	DSGPFA	Esrrb_M_DSG_R2	0.0173554
															esrrb_dsg_fa	Input	A	PFA	Input_A_FA_R1	0.0153577
															esrrb_dsg_fa	Input	M	PFA	Input_M_FA_R1	0.010542
															esrrb_dsg_fa	Input	A	PFA	Input_A_FA_R2	0.00925365
															esrrb_dsg_fa	Input	M	PFA	Input_M_FA_R2	0.0117038
															ctcf_v3	Ctcf	A	PFA	CTCF_A_FA	0.150127
															ctcf_v3	Ctcf	M	PFA	CTCF_M_FA	0.0478042
															ctcf_v3	Ctcf	A	DSGPFA	CTCF_A_DSG	0.0488165
															ctcf_v3	Ctcf	M	DSGPFA	CTCF_M_DSG	0.0174589
															ctcf_v3	Smc1	A	PFA	Smc1_A_FA	0.0294592
															ctcf_v3	Smc1	M	PFA	Smc1_M_FA	0.00908185
															ctcf_v3	Smc1	A	DSGPFA	Smc1_A_DSG	0.0102521
															ctcf_v3	Smc1	M	DSGPFA	Smc1_M_DSG	0.00581307
															ctcf_v3	Esrrb	A	PFA	Esrrb_A_FA	0.0111023
															ctcf_v3	Esrrb	M	PFA	Esrrb_M_FA	0.00702684
															ctcf_v3	Esrrb	A	DSGPFA	Esrrb_A_DSG	0.0190495
															ctcf_v3	Esrrb	M	DSGPFA	Esrrb_M_DSG	0.00879902

## Sheet: MNase_H3_ATAC
Type	Label	Group	AM	Concentration	Rep	Index	TotalReads	Mapped/Filter/BarcodeCollapsed Reads	AlignmentRate	ReadLength	Paired	Barcode
MNase	A_0.5_1	A_0.5	A	0.5	1	1	252449291	98163628	0.388845	150	1	1
MNase	A_0.5_2	A_0.5	A	0.5	2	2	277995666	106666599	0.383699	150	1	1
MNase	A_0.5_3	A_0.5	A	0.5	3	3	255240115	103989029	0.407416	150	1	1
MNase	A_16_1	A_16	A	16	1	4	247790155	109508786	0.441942	150	1	1
MNase	A_16_2	A_16	A	16	2	5	332991821	133130482	0.399801	150	1	1
MNase	A_16_3	A_16	A	16	3	6	224842727	94650255	0.420962	150	1	1
MNase	A_128_1	A_128	A	128	1	7	222262670	94979533	0.42733	150	1	1
MNase	A_128_2	A_128	A	128	2	8	146382190	63215844	0.431855	150	1	1
MNase	A_128_3	A_128	A	128	3	9	309609982	128587129	0.41532	150	1	1
MNase	M_0.5_1	M_0.5	M	0.5	1	10	246994362	136360140	0.552078	150	1	1
MNase	M_0.5_2	M_0.5	M	0.5	2	11	269008319	80888824	0.300693	150	1	1
MNase	M_0.5_3	M_0.5	M	0.5	3	12	311004490	97837658	0.314586	150	1	1
MNase	M_16_1	M_16	M	16	1	13	344437032	91970308	0.267016	150	1	1
MNase	M_16_2	M_16	M	16	2	14	211852090	78886038	0.372364	150	1	1
MNase	M_16_3	M_16	M	16	3	15	243014685	173869066	0.715467	150	1	1
MNase	M_128_1	M_128	M	128	1	16	217387532	93201010	0.428732	150	1	1
MNase	M_128_2	M_128	M	128	2	17	202980580	100925891	0.497219	150	1	1
MNase	M_128_3	M_128	M	128	3	18	448982721	110153886	0.245341	150	1	1
MNaseH3	H3_A_0.5_1	H3_A_0.5	A	0.5	1	19	119152706	33763065	0.28336	150	1	1
MNaseH3	H3_A_16_1	H3_A_16	A	16	1	20	112611179	53232990	0.472715	150	1	1
MNaseH3	H3_A_128_1	H3_A_128	A	128	1	21	101868386	48898609	0.480018	150	1	1
MNaseH3	H3_M_0.5_1	H3_M_0.5	M	0.5	1	22	175733301	58091515	0.330566	150	1	1
MNaseH3	H3_M_16_1	H3_M_16	M	16	1	23	128624125	56172781	0.43672	150	1	1
MNaseH3	H3_M_128_1	H3_M_128	M	128	1	24	100112543	46781036	0.467284	150	1	1
MNaseH3	H3_A_0.5_2	H3_A_0.5	A	0.5	2	25	125090791	31027269	0.248038	150	1	1
MNaseH3	H3_A_16_2	H3_A_16	A	16	2	26	108996949	51684268	0.474181	150	1	1
MNaseH3	H3_A_128_2	H3_A_128	A	128	2	27	158580584	47810959	0.301493	150	1	1
MNaseH3	H3_M_0.5_2	H3_M_0.5	M	0.5	2	28	120121162	33116812	0.275695	150	1	1
MNaseH3	H3_M_16_2	H3_M_16	M	16	2	29	110563716	71328516	0.645135	150	1	1
MNaseH3	H3_M_128_2	H3_M_128	M	128	2	30	97715403	51846763	0.530589	150	1	1
ATAC	Tg2a_A_1	Tg2a_A	A	-	1	31	34753281	21370491	0.61492	150	1	1
ATAC	Tg2a_A_2	Tg2a_A	A	-	2	32	49983294	30275579	0.605714	150	1	1
ATAC	Tg2a_M_1	Tg2a_M	M	-	1	33	28253734	16613973	0.588028	150	1	1
ATAC	Tg2a_M_2	Tg2a_M	M	-	2	34	50990341	29740604	0.58326	150	1	1

## Sheet: Sox2Aid RNAseq
Sample	CC	TF	Group	CountedReads
EG1_p_1	EG1	m	EG1_p	7580687
EG1_p_2	EG1	m	EG1_p	8235309
EG1_p_3	EG1	m	EG1_p	8190836
EG1_m_1	EG1	p	EG1_m	8697491
EG1_m_2	EG1	p	EG1_m	8757640
EG1_m_3	EG1	p	EG1_m	13826189
LG1_p_1	LG1	m	LG1_p	7464702
LG1_p_2	LG1	m	LG1_p	6857182
LG1_p_3	LG1	m	LG1_p	7578444
LG1_m_1	LG1	p	LG1_m	8564235
LG1_m_2	LG1	p	LG1_m	8357893
LG1_m_3	LG1	p	LG1_m	11981509
G2_p_1	G2	m	G2_p	7721734
G2_p_2	G2	m	G2_p	8902973
G2_p_3	G2	m	G2_p	7916960
G2_m_1	G2	p	G2_m	7196723
G2_m_2	G2	p	G2_m	7000583
G2_m_3	G2	p	G2_m	10951585
