# Supplementary material for: Transcription factor activity and nucleosome organization in mitosis
Source: HighWire-hosted journal article supplement (doi:10.1101/gr.243048.118), 2019-01-17
Supplement: Supplemental_Table_S2.xlsx [file Supplemental_Table_S2.xlsx]

## Sheet: ESRRB
Peaks and bookmarking calls for ESRRB
chrom	start	stop	MeanReadsA	MeanReadsM	PeakHeightA	PeakHeightM	max_nlog10q_A	max_nlog10q_M	Summit	max_motif_start	max_motif_stop	max_motif_strand	max_motif_score	log2fc_AvI	log2fc_AvM	log2fc_MvI	pvalue_AvI	pvalue_AvM	pvalue_MvI	padj_AvI	padj_AvM	padj_MvI	BSLE	BookLost
chr1	3472824	3473307	73.7303	8.78166	38.334	4.8257	37.4264	0	3473110	0	0	0	0	3.15193	-3.11282	0.0391133	3.22776e-25	2.0497e-10	0.933378	1.34571e-24	2.19201e-09	0.949296	L	Lost
chr1	3946123	3946983	168.964	21.9019	62.4222	7.23601	72.7322	0	3946562	3946551	3946562	+	10.2105	3.46081	-2.94616	0.514648	2.77031e-33	1.68833e-13	0.15649	2.33902e-32	4.38025e-12	0.208382	L	Lost
chr1	4126169	4127102	113.307	79.0197	39.572	27.9799	32.9742	17.1543	4126677	4126719	4126730	-	15.3333	3.3088	-0.51831	2.79049	2.33323e-33	0.104865	3.56429e-22	1.97983e-32	0.130871	4.75234e-21	BS	Book
chr1	4129202	4129643	53.0558	12.3499	32.1677	4.8257	37.2297	0	4129439	4129400	4129411	-	6.47368	2.21917	-2.10039	0.118785	2.70568e-09	6.24603e-05	0.79953	2.98634e-09	0.000140838	0.84003	L	Lost
chr1	4142032	4142645	56.1895	17.4639	23.2977	7.42985	24.4541	0	4142364	4142357	4142368	-	8.38596	2.99743	-1.68718	1.31025	4.635e-21	5.57846e-05	0.000833775	1.31747e-20	0.000127222	0.00159799	L	Lost
chr1	4336490	4337044	22.0691	67.4349	8.34194	22.1901	4.64041	18.2926	4336698	4336706	4336717	-	15.7895	1.73809	1.61893	3.35702	1.24843e-05	0.00026034	1.07436e-19	1.26502e-05	0.000518313	1.09019e-18	BM	Book
chr1	4482594	4483255	76.1494	113.282	22.0596	39.3657	15.6265	33.8527	4482810	4482722	4482733	+	15.5614	2.51475	0.568558	3.08331	8.08237e-17	0.10461	1.10412e-24	1.54512e-16	0.130577	1.98653e-23	BS	Book
chr1	4588486	4588890	84.2195	13.4084	53.3562	6.36627	42.6621	0	4588667	4588604	4588615	+	7.61404	2.72611	-2.60553	0.120584	2.24608e-20	2.42507e-09	0.764541	5.99123e-20	1.88825e-08	0.811307	L	Lost
chr1	4650435	4650629	41.2433	5.5016	41.2433	5.5016	35.7606	0	4650533	4650488	4650499	+	13.8421	5.97628	-3.00131	2.97497	7.11171e-24	6.61516e-07	6.97362e-05	2.61964e-23	2.51933e-06	0.000152217	L	Lost
chr1	4650956	4651421	47.476	19.3921	25.3784	9.84016	24.1444	3.85248	4651075	4651041	4651052	+	11.1754	2.97544	-1.27868	1.69676	4.2493e-20	0.00169503	9.84091e-06	1.10373e-19	0.00290507	2.36128e-05	L	Lost
chr1	4678648	4679345	87.0243	36.4734	33.7678	13.8956	33.335	5.87762	4679217	4679126	4679137	+	13.2456	3.15913	-1.26091	1.89822	3.25134e-21	0.00218317	2.28074e-07	9.3872e-21	0.00366867	6.45098e-07	L	Lost
chr1	4712794	4713105	30.0348	8.87604	20.4453	4.63186	20.4426	0	4712895	4712865	4712876	+	11.2807	2.38906	-1.74404	0.645017	3.2987e-10	0.00117971	0.194842	3.79659e-10	0.00207992	0.253395	L	Lost
chr1	4792174	4792909	164.54	39.9371	79.1488	18.4229	78.7607	19.9802	4792658	4792714	4792725	-	13.8421	4.3951	-2.02394	2.37116	1.17778e-37	9.38365e-07	2.99033e-10	1.42735e-36	3.41684e-06	1.1262e-09	BA	Book
chr1	4793126	4793715	80.42	33.5759	27.9398	11.192	17.1768	2.67287	4793344	4793353	4793364	+	4.38596	2.50157	-1.25724	1.24433	5.42417e-14	0.00296153	0.000717522	8.07097e-14	0.00486511	0.00138646	L	Lost
chr1	4796713	4797735	374.352	426.006	166.145	174.47	180.011	172.452	4797505	4797454	4797465	+	14.3158	4.62207	0.1855	4.80757	1.21639e-56	0.580821	8.92353e-61	6.91385e-55	0.619935	9.76781e-58	BS	Book
chr1	4800155	4800728	81.5062	38.9933	33.2966	14.4771	27.65	4.94994	4800481	4800319	4800330	-	7.77193	2.56197	-1.09166	1.47031	2.755e-11	0.0233393	0.000343468	3.37432e-11	0.0327181	0.000690047	L	Lost
chr1	4840256	4840754	52.0422	37.6313	26.2306	19.4916	20.1921	11.1494	4840547	4840575	4840586	+	16.3509	2.44591	-0.475084	1.97082	4.5736e-14	0.226582	1.33199e-08	6.85283e-14	0.264987	4.27367e-08	BS	Book
chr1	4845282	4846187	303.72	50.1802	126.587	13.8956	143.911	3.52609	4845669	4845807	4845818	+	7.98246	3.81117	-2.61323	1.19794	1.65862e-39	1.98741e-12	0.00022109	2.38382e-38	3.78656e-11	0.000454406	L	Lost
chr1	4960709	4961481	118.03	18.6218	60.4648	6.27189	48.6983	0	4960871	0	0	0	0	2.5358	-2.66571	-0.129918	3.06507e-13	3.02009e-08	0.757853	4.29055e-13	1.70375e-07	0.805609	L	Lost
chr1	4961853	4962806	499.781	79.6012	255.825	22.8711	248.987	22.3636	4962616	4962528	4962539	-	14.7719	4.98552	-2.65131	2.3342	3.50805e-57	3.87123e-12	2.55899e-12	2.09575e-55	6.8525e-11	1.19082e-11	BA	Book
chr1	5195957	5196256	27.5066	5.30776	20.8406	2.99183	15.5693	0	5196052	5196088	5196099	-	7.4386	3.21217	-2.42717	0.784999	5.32447e-15	8.29726e-05	0.195426	8.64061e-15	0.0001826	0.254047	L	Lost
chr1	5222177	5222658	95.3568	12.1561	48.7472	4.1498	40.196	0	5222394	5222384	5222395	+	10.8246	3.14098	-2.95538	0.185594	4.28681e-22	5.48712e-10	0.67258	1.34267e-21	5.19012e-09	0.732599	L	Lost
chr1	5222931	5223299	51.2185	4.43802	27.9161	2.50977	21.9587	0	5223098	5223208	5223219	+	3.14035	2.35009	-3.51099	-1.16089	4.89427e-15	5.54147e-09	0.0448401	7.96381e-15	3.89314e-08	0.0667351	L	Lost
chr1	5226273	5226941	65.7884	21.0321	24.1546	6.46573	24.9796	0	5226623	5226645	5226656	-	14.1579	3.13607	-1.63312	1.50295	2.24414e-21	0.000111341	0.000115472	6.58171e-21	0.00023877	0.000245755	L	Lost
chr1	5898889	5899644	41.6623	84.6207	13.7509	32.2292	7.87797	26.9212	5899298	5899297	5899308	-	12.8596	2.37414	1.0197	3.39384	6.95673e-12	0.0087997	6.29675e-24	8.83899e-12	0.0133001	1.03672e-22	BM	Book
chr1	6049033	6049633	189.109	23.9296	116.621	11.0976	159.712	4.0795	6049355	6049048	6049059	-	10.0351	4.5163	-2.99139	1.52492	1.0777e-50	1.98213e-14	3.62789e-05	3.75074e-49	6.63311e-13	8.17975e-05	L	Lost
chr1	6107199	6108046	133.828	46.9843	85.4385	10.8043	66.1044	3.01831	6107804	6107833	6107844	+	14.3158	3.1605	-1.50049	1.66001	3.69541e-30	1.5058e-05	7.74656e-08	2.37989e-29	3.95085e-05	2.29696e-07	L	Lost
chr1	6132904	6133168	36.6628	3.95596	27.0734	2.31593	20.2848	0	6133059	0	0	0	0	2.60452	-3.21752	-0.612994	5.74507e-15	5.06619e-07	0.323713	9.29738e-15	1.99336e-06	0.396554	L	Lost
chr1	6204028	6204740	146.404	129.21	69.036	43.5206	116.372	39.5025	6204571	6204532	6204543	+	8.75439	4.11638	-0.184341	3.93204	2.22511e-27	0.674897	1.39022e-24	1.12727e-26	0.708316	2.46856e-23	BS	Book
chr1	6338498	6338861	45.8285	22.9655	26.6496	9.45756	25.6192	4.64491	6338741	6338688	6338699	+	12.5088	3.42952	-1.00914	2.42038	1.74721e-18	0.0280402	2.03347e-08	3.90722e-18	0.0387634	6.39911e-08	L	Lost
chr1	6437935	6439396	453.39	85.1972	138.752	22.6722	147.064	16.2152	6439080	6438216	6438227	-	12.8596	4.15174	-2.413	1.73874	2.11728e-75	1.44061e-17	4.59445e-12	4.88746e-73	1.16669e-15	2.08121e-11	BA	Book
chr1	6448006	6448742	239.575	19.5859	102.122	10.9037	97.3436	3.45724	6448297	6448352	6448363	+	14.7719	4.45202	-3.60811	0.84391	9.5814e-52	6.62972e-19	0.0257962	3.63269e-50	7.47396e-17	0.0400963	L	Lost
chr1	7036970	7038503	250.922	43.8981	47.9092	7.81753	41.3009	0	7037533	7038110	7038121	+	17.8772	3.38103	-2.51071	0.870329	1.35675e-21	3.21042e-08	0.024244	4.05306e-21	1.79615e-07	0.0378501	L	Lost
chr1	7077853	7078604	82.896	54.4243	28.7541	15.1479	24.1274	6.23856	7078193	7078249	7078260	+	5.21053	2.36766	-0.620494	1.74717	9.9496e-17	0.0771588	9.99955e-09	1.88709e-16	0.0986161	3.24548e-08	L	Lost
chr1	7079345	7080632	180.705	94.8537	45.3431	24.1234	58.2662	11.7534	7079960	7079929	7079940	-	13.7193	3.07705	-0.936237	2.14082	1.9745e-28	0.00583588	2.30112e-13	1.0946e-27	0.0091031	1.18849e-12	BA	Book
chr1	7116046	7116585	97.4185	25.3758	77.8728	16.9818	68.3979	5.83296	7116180	7116347	7116358	-	16.3333	5.09884	-1.94235	3.15649	6.04735e-44	6.88346e-07	2.9495e-14	1.2482e-42	2.60892e-06	1.66753e-13	L	Lost
chr1	7302653	7304028	182.133	21.1265	43.8094	4.92008	42.8394	0	7303731	7303026	7303037	-	9.54386	3.28893	-3.08081	0.208112	2.19982e-27	2.9635e-13	0.581423	1.11596e-26	7.1168e-12	0.651825	L	Lost
chr1	7441733	7442178	112.836	9.36318	71.2211	3.86158	78.9408	0	7441922	7441840	7441851	-	6.80702	3.82384	-3.69623	0.127616	1.33973e-32	2.38725e-13	0.790788	1.06616e-31	5.90858e-12	0.833089	L	Lost
chr1	7484105	7484772	166.564	59.3393	76.2633	25.9573	95.242	15.3155	7484457	7484443	7484454	-	16.3333	4.35749	-1.49081	2.86668	1.02318e-45	2.91148e-05	4.18529e-18	2.46588e-44	7.0946e-05	3.58092e-17	BA	Book
chr1	7492530	7493165	55.8369	11.8679	22.4929	6.17751	18.0296	0	7492696	7493108	7493119	+	7.85965	2.40988	-2.23832	0.171559	1.24247e-15	7.07048e-07	0.681778	2.13234e-15	2.67085e-06	0.740738	L	Lost
chr1	7661275	7662042	230.572	43.5155	105.675	13.99	132.387	8.12979	7661844	7661738	7661749	-	9.05263	3.71539	-2.40791	1.30748	3.21961e-40	2.06345e-11	4.2503e-05	4.87292e-39	2.95689e-10	9.51041e-05	L	Lost
chr1	7722110	7723477	445.767	67.8277	147.941	16.8823	171.91	10.5784	7722986	7722254	7722265	+	12.4912	4.81322	-2.71549	2.09773	7.2526e-37	6.75446e-09	1.53191e-07	8.23912e-36	4.63309e-08	4.41802e-07	BA	Book
chr1	8523108	8523702	69.1973	24.4116	26.6733	11.3858	26.7993	0	8523477	8523102	8523113	+	6.87719	3.16563	-1.50958	1.65605	9.73926e-25	0.00010533	4.89713e-06	3.88072e-24	0.000227133	1.21455e-05	L	Lost
chr1	8926011	8926364	160.778	24.7942	117.464	16.112	106.467	12.1819	8926179	8926299	8926310	+	14.5789	5.83841	-2.68224	3.15617	1.5552e-56	1.15395e-11	7.2183e-14	8.76623e-55	1.77422e-10	3.91776e-13	BA	Book
chr1	8932087	8933052	96.9568	41.9699	27.4686	10.9037	31.144	5.87762	8932747	0	0	0	0	3.44277	-1.20621	2.23656	7.36855e-19	0.0105349	5.92796e-08	1.70837e-18	0.0157161	1.77729e-07	L	Lost
chr1	9354440	9354775	39.6242	7.42985	27.5161	4.92008	24.252	0	9354649	0	0	0	0	2.37212	-2.43081	-0.0586878	1.80337e-11	1.00297e-05	0.90895	2.23262e-11	2.75323e-05	0.930139	L	Lost
chr1	9433072	9433705	45.3383	4.92008	21.2264	2.79799	22.6034	0	9433235	9433638	9433649	+	4.24561	3.4431	-3.17245	0.270656	7.8237e-18	5.80257e-07	0.65873	1.641e-17	2.24284e-06	0.720287	L	Lost
chr1	9520874	9521127	32.5108	9.84016	25.4116	6.07804	21.9625	0	9520967	9520999	9521010	-	12.9298	3.66331	-1.69582	1.96749	1.31487e-18	0.000947108	0.000129644	2.97709e-18	0.0016998	0.000274077	L	Lost
chr1	9628751	9629248	54.0803	18.5224	20.8311	8.29451	13.3269	4.51335	9628943	9629004	9629015	-	2.61404	2.36204	-1.52414	0.837896	5.04395e-11	0.00132936	0.0460886	6.0754e-11	0.00232425	0.0684671	L	Lost
chr1	9648362	9648738	39.5863	33.9636	24.1451	13.1253	15.4299	5.08635	9648588	9648570	9648581	-	18.4737	2.29295	-0.224753	2.0682	3.90593e-13	0.550529	7.62471e-10	5.42641e-13	0.591249	2.76657e-09	L	Lost
chr1	9690849	9691251	45.3905	33.3821	22.5024	13.2146	10.7767	7.46579	9690973	9690929	9690940	-	2.40351	1.86501	-0.437787	1.42722	1.20444e-07	0.318544	0.000141639	1.25999e-07	0.361305	0.000298024	L	Lost
chr1	9691848	9692772	167.982	46.9843	62.5551	12.3499	53.9498	3.51997	9692242	9692344	9692355	-	14.0877	3.34736	-1.82874	1.51862	1.59114e-33	1.84894e-07	1.08644e-06	1.36862e-32	8.21204e-07	2.87703e-06	L	Lost
chr1	9703370	9703844	21.2644	40.0416	8.34194	21.2311	4.64041	14.36	9703561	9703685	9703696	+	18.4737	2.1903	0.912488	3.10278	2.5967e-08	0.0343068	2.82046e-16	2.76462e-08	0.0467297	1.98933e-15	BM	Book
chr1	9739038	9739816	42.8386	86.7428	12.4987	30.783	4.78775	21.3803	9739576	9739526	9739537	-	17.5439	2.3416	1.01559	3.35719	2.62709e-10	0.0165842	1.71811e-20	3.04198e-10	0.023889	1.91401e-19	BM	Book
chr1	9745623	9746095	57.0749	10.4166	28.3446	5.69036	29.3014	0	9745942	9745923	9745934	-	9.54386	3.33459	-2.37878	0.955819	5.42649e-22	8.66513e-07	0.0380083	1.68454e-21	3.18978e-06	0.0573854	L	Lost
chr1	9787672	9788083	34.1014	34.9328	18.3077	20.5501	14.6069	14.3166	9787919	9788010	9788021	+	14.5789	3.06409	0.0202665	3.08436	8.06286e-13	0.966511	2.00442e-12	1.09347e-12	0.971058	9.43097e-12	BS	Book
chr1	9807113	9807808	67.8929	33.2877	25.4021	13.3191	20.0604	5.77328	9807439	9807440	9807451	-	18.4737	2.30459	-1.02982	1.27477	9.9689e-14	0.00893369	0.000219192	1.45058e-13	0.0134819	0.000450751	L	Lost
chr1	9836245	9836782	62.1029	18.428	31.2728	6.56011	26.4232	0	9836501	9836404	9836415	+	3.98246	2.52327	-1.74599	0.777272	3.57529e-17	2.01877e-05	0.037583	7.06748e-17	5.12824e-05	0.0568115	L	Lost
chr1	9846177	9846577	42.4908	28.1788	21.6786	15.3468	17.698	8.83313	9846399	9846408	9846419	-	18.1053	2.67388	-0.61754	2.05634	8.1354e-14	0.152496	1.18695e-07	1.19299e-13	0.184479	3.46383e-07	L	Lost
chr1	9864838	9865363	42.4481	53.5444	19.9647	23.4475	14.6858	14.36	9865235	9865219	9865230	-	10.1579	2.22129	0.342986	2.56427	1.75486e-11	0.371647	1.34568e-14	2.17438e-11	0.415878	7.91109e-14	BS	Book
chr1	9879447	9880217	133.629	14.1838	56.1895	4.73132	65.2938	0	9879711	9879837	9879848	+	9.54386	3.88057	-3.24295	0.637615	2.14051e-33	1.19825e-12	0.134286	1.82086e-32	2.4583e-11	0.181659	L	Lost
chr1	9899035	9899474	52.5087	12.832	22.9498	4.1498	16.8884	0	9899346	9899233	9899244	-	1.2807	1.73566	-2.0252	-0.289542	1.50407e-07	2.63306e-05	0.500312	1.56986e-07	6.48717e-05	0.574852	L	Lost
chr1	9942788	9943924	210.754	22.4783	65.8027	5.8842	56.9397	0	9943252	9943801	9943812	-	6.15789	3.51988	-3.21046	0.309417	6.33126e-33	4.16197e-15	0.399398	5.17808e-32	1.68933e-13	0.475389	L	Lost
chr1	10021541	10022142	156.231	17.9459	70.4401	6.56011	68.5477	0	10021894	10021820	10021831	+	5.7193	3.16044	-3.1189	0.0415336	8.04745e-32	3.92157e-15	0.909259	6.00163e-31	1.59941e-13	0.93033	L	Lost
chr1	10042920	10043482	39.9483	45.6325	16.6507	22.4783	16.9261	18.8148	10043230	10043200	10043211	-	9.73684	3.52694	0.202681	3.72962	8.14292e-21	0.604724	1.83755e-22	2.26728e-20	0.642558	2.52648e-21	BS	Book
chr1	10089433	10090046	77.0538	47.9637	32.4871	16.6936	36.6402	8.29144	10089819	10089768	10089779	-	17.8772	3.06329	-0.706495	2.35679	3.02063e-21	0.0673032	8.13381e-12	8.74713e-21	0.0869456	3.60413e-11	L	Lost
chr1	10216667	10217333	124.53	37.6262	62.0839	16.3059	56.5442	9.78493	10217064	10217112	10217123	-	13.9474	3.20324	-1.71665	1.48659	1.07266e-29	1.81622e-06	4.28806e-06	6.65787e-29	6.08678e-06	1.07061e-05	L	Lost
chr1	10245774	10246549	71.2116	27.2096	26.6591	8.20013	19.9271	0	10245946	10245957	10245968	-	11.2982	2.69882	-1.39296	1.30586	3.55174e-18	0.000479602	0.000263485	7.69464e-18	0.000907103	0.000537309	L	Lost
chr1	10247301	10247545	28.3161	10.3273	20.4169	6.65957	13.9029	0	10247443	10247450	10247461	-	4.24561	2.54043	-1.53	1.01043	1.49751e-11	0.00292756	0.0357757	1.86293e-11	0.00481264	0.0542827	L	Lost
chr1	10370966	10371276	35.0343	6.27189	20.8643	4.1498	18.7788	0	10371083	10371143	10371154	+	5.50877	3.31097	-2.49588	0.815094	1.2053e-17	1.34216e-05	0.146424	2.48614e-17	3.56869e-05	0.196279	L	Lost
chr1	10707141	10708083	82.0818	29.8138	22.9214	7.71807	20.4566	0	10707275	10707289	10707300	-	13.2456	2.61676	-1.46081	1.15595	2.37567e-16	0.00037815	0.00141558	4.35045e-16	0.00073153	0.00264073	L	Lost
chr1	10842829	10843626	350.559	30.4897	170.273	9.16934	185.989	3.9791	10843188	10843224	10843235	+	12.9298	5.10182	-3.52486	1.57696	1.01443e-46	5.41558e-15	9.41768e-05	2.65403e-45	2.13187e-13	0.000202657	L	Lost
chr1	10868336	10869157	101.689	17.1756	39.5863	5.30776	34.1794	0	10868480	10868840	10868851	+	10.2982	3.17171	-2.58012	0.591585	5.66886e-26	1.03673e-09	0.12884	2.53007e-25	8.96974e-09	0.175059	L	Lost
chr1	10891662	10892384	78.6871	37.1442	33.3346	11.674	32.8701	5.39662	10892049	10892091	10892102	+	18.4737	2.59622	-1.07408	1.52215	2.68115e-19	0.00312949	2.46784e-06	6.46023e-19	0.00511848	6.31103e-06	L	Lost
chr1	10979632	10980097	62.4981	23.8352	28.3446	9.45756	20.0604	4.0795	10979901	10979918	10979929	-	15.3333	2.84069	-1.41397	1.42671	5.57596e-19	0.000539887	0.000127372	1.30579e-18	0.00101037	0.000269593	L	Lost
chr1	11071558	11072534	66.3118	24.4116	24.5926	8.20013	20.7889	0	11072433	11071755	11071766	+	18.1053	2.35788	-1.44755	0.910329	2.23739e-14	0.000379547	0.0119506	3.44862e-14	0.000733963	0.0195913	L	Lost
chr1	11086797	11087207	48.7567	6.75395	31.6823	3.28005	34.4446	0	11086899	11086937	11086948	-	4.35088	3.51234	-2.85184	0.660509	7.96235e-23	1.60481e-07	0.215451	2.66693e-22	7.26661e-07	0.276939	L	Lost
chr1	11110576	11111543	116.226	14.6659	58.3367	3.76211	63.8525	0	11110822	11110797	11110808	+	16.3333	2.97198	-2.98861	-0.0166333	7.02889e-27	9.02356e-13	0.965742	3.40584e-26	1.90421e-11	0.974269	L	Lost
chr1	11139262	11139943	109.569	24.5009	53.3467	10.6104	46.3774	0	11139661	11139637	11139648	-	4.54386	2.78115	-2.11942	0.66173	2.52206e-23	2.50196e-08	0.0533577	8.82916e-23	1.44312e-07	0.0782794	L	Lost
chr1	11241112	11241645	70.8021	7.52423	32.9108	3.76211	38.9246	0	11241382	11241503	11241514	-	8.4386	3.67486	-3.18748	0.487372	5.20706e-24	5.10791e-09	0.350049	1.9423e-23	3.62078e-08	0.424738	L	Lost
chr1	11266513	11269186	487.73	126.093	66.2643	21.1316	86.4001	19.9802	11268075	11267078	11267089	+	16.9298	3.87373	-1.94657	1.92716	1.88054e-46	6.33155e-09	1.26737e-11	4.83428e-45	4.37841e-08	5.50156e-11	BA	Book
chr1	11320181	11320846	90.7573	17.6526	31.6159	6.27189	27.3929	0	11320567	0	0	0	0	2.63589	-2.31789	0.317998	9.92073e-21	8.96683e-09	0.387174	2.73803e-20	5.90245e-08	0.463062	L	Lost
chr1	11386126	11386541	59.2173	2.60415	32.5582	2.12209	37.0099	0	11386277	11386175	11386186	-	1.05263	3.52746	-4.40926	-0.881793	7.50523e-22	4.6571e-09	0.231068	2.29872e-21	3.34241e-08	0.29469	L	Lost
chr1	11417567	11417871	39.6005	5.49652	24.1641	3.37443	16.9599	0	11417681	11417681	11417692	+	7.91228	2.6707	-2.72115	-0.0504559	3.40476e-12	6.68024e-06	0.929139	4.42218e-12	1.92167e-05	0.946005	L	Lost
chr1	11457376	11458021	109.922	15.3418	53.7182	4.92008	47.0647	0	11457490	11457434	11457445	+	13.8421	4.7074	-2.8492	1.8582	5.0114e-41	1.33114e-10	2.33514e-05	8.12091e-40	1.50767e-09	5.37574e-05	L	Lost
chr1	11477707	11478387	84.8582	35.221	44.5146	17.1756	53.0776	8.19248	11478029	11477994	11478005	+	3.82456	3.58654	-1.28027	2.30627	2.82734e-22	0.00398414	8.57522e-09	8.99663e-22	0.00639729	2.79953e-08	L	Lost
chr1	11491069	11492453	310.533	44.4746	105.008	10.8043	98.1756	4.26944	11491813	11491787	11491798	+	13.7193	3.98784	-2.79271	1.19513	1.99391e-39	7.48421e-13	0.000449808	2.85001e-38	1.61553e-11	0.000891446	L	Lost
chr1	11737750	11739226	204.831	36.7616	43.3003	7.14163	51.6962	0	11738758	11738109	11738120	+	11.6316	3.3008	-2.48076	0.820044	1.11998e-27	3.79413e-10	0.0178914	5.83963e-27	3.77776e-09	0.0285564	L	Lost
chr1	12116777	12116942	25.0021	4.72624	25.0021	4.72624	14.5075	0	12116832	12116875	12116886	-	12.4561	4.17697	-2.32223	1.85474	8.98101e-18	0.00018835	0.00505027	1.8739e-17	0.000385948	0.00874117	L	Lost
chr1	12490756	12491606	44.6047	97.0701	16.2507	22.7716	11.3497	12.5822	12491192	12491312	12491323	-	17.3158	1.83852	1.11747	2.95599	1.16251e-09	0.00120247	2.28157e-24	1.30478e-09	0.00211614	3.96622e-23	BM	Book
chr1	12562467	12563104	79.5488	29.0435	26.6638	14.2833	18.9646	8.55457	12562995	12562720	12562731	+	11.1754	2.74526	-1.4611	1.28416	1.56128e-18	0.000270302	0.000330586	3.50853e-18	0.000536478	0.00066602	L	Lost
chr1	12576827	12577331	51.228	5.11392	20.4169	3.95596	13.4667	0	12577085	12577134	12577145	-	12.4561	3.05231	-3.33609	-0.283783	2.76458e-20	1.39025e-08	0.618361	7.31638e-20	8.64965e-08	0.685043	L	Lost
chr1	12596405	12597687	200.665	239.877	67.4549	76.8083	76.1075	80.382	12596965	12596922	12596933	-	17.5439	3.39282	0.255145	3.64796	3.21333e-38	0.403434	1.71857e-43	4.09302e-37	0.447831	2.8447e-41	BS	Book
chr1	12682065	12682356	63.7599	10.1335	42.0955	5.01954	33.7197	0	12682186	0	0	0	0	2.71108	-2.70911	0.00197184	2.68205e-16	7.11285e-08	0.996625	4.88514e-16	3.5842e-07	0.997448	L	Lost
chr1	12708377	12709026	117.84	23.7357	52.8945	9.06988	45.609	0	12708752	0	0	0	0	2.51939	-2.31442	0.204968	3.44614e-15	1.04223e-07	0.590736	5.68543e-15	4.99592e-07	0.660323	L	Lost
chr1	12730202	12731416	230.305	98.4118	90.3953	28.2681	90.2807	20.6595	12730686	12730669	12730680	-	11.193	3.33455	-1.22463	2.10992	2.53097e-37	0.000126781	2.48189e-14	2.97277e-36	0.000268946	1.41519e-13	BA	Book
chr1	12734005	12735583	502.142	65.1241	135.038	9.3581	120.5	0	12734756	0	0	0	0	3.78393	-2.94231	0.84162	4.84493e-48	2.15571e-18	0.00370368	1.39038e-46	2.15781e-16	0.00653886	L	Lost
chr1	12737357	12737853	94.1235	14.472	47.4902	6.56011	37.0205	0	12737623	12737593	12737604	+	11.5439	2.99278	-2.69066	0.302122	2.89386e-27	6.40199e-11	0.432942	1.45198e-26	7.98379e-10	0.508833	L	Lost
chr1	12743382	12744651	332.342	81.0474	145.304	25.1819	131.232	19.3943	12744225	12744213	12744224	-	9.01754	3.60752	-2.0359	1.57161	5.31711e-46	1.55975e-10	1.28659e-08	1.31601e-44	1.72569e-09	4.13506e-08	BA	Book
chr1	12752050	12752990	116.174	29.1379	35.8011	10.034	28.3892	0	12752876	12752771	12752782	-	13.7193	3.11443	-1.99288	1.12155	8.0335e-23	1.25997e-06	0.002156	2.6889e-22	4.41769e-06	0.0039234	L	Lost
chr1	12753195	12753568	56.618	10.7099	27.4591	5.78982	24.1903	0	12753378	12753283	12753294	-	2.5614	2.66303	-2.4042	0.258836	4.62723e-17	3.98114e-07	0.558531	9.05461e-17	1.60939e-06	0.630116	L	Lost
chr1	12754885	12755177	50.79	19.5859	27.4781	11.674	15.134	0	12755019	12754992	12755003	+	16.9298	1.86029	-1.3713	0.488985	2.69443e-07	0.00436362	0.241558	2.79312e-07	0.0069507	0.30664	L	Lost
chr1	12800360	12801094	122.002	51.6264	47.4523	22.389	40.196	9.73553	12800712	12800658	12800669	-	5.61404	2.99463	-1.25215	1.74249	3.09712e-20	0.00190096	5.97693e-07	8.16016e-20	0.00323188	1.62109e-06	L	Lost
chr1	12803968	12805418	274.98	90.987	81.658	19.1039	65.1982	7.93186	12804762	12804048	12804059	+	9.35088	2.6298	-1.59696	1.03284	2.2187e-24	1.09156e-06	0.000190764	8.57192e-24	3.90429e-06	0.000395262	L	Lost
chr1	12825322	12825762	70.8258	16.4053	30.4253	7.62369	20.6046	0	12825527	12825542	12825553	+	6.57895	2.08305	-2.14268	-0.0596276	3.51604e-11	1.84411e-06	0.881726	4.27848e-11	6.16393e-06	0.907937	L	Lost
chr1	12826128	12826414	37.553	8.39397	24.6353	6.07804	21.7384	0	12826313	0	0	0	0	2.37944	-2.15503	0.224418	1.03759e-11	4.1413e-05	0.646485	1.30422e-11	9.73041e-05	0.709596	L	Lost
chr1	12901945	12902789	67.5118	16.5941	27.1018	9.16426	26.6001	0	12902526	12902104	12902115	-	3.42105	2.97711	-2.01068	0.966422	5.12936e-19	7.68102e-06	0.0189557	1.20553e-18	2.17581e-05	0.0301305	L	Lost
chr1	12944010	12944917	204.978	48.6345	100.427	19.9736	91.1764	7.88562	12944443	12944883	12944894	+	6.70175	3.89831	-2.08664	1.81167	6.35946e-34	1.75519e-07	2.5719e-07	5.68033e-33	7.8491e-07	7.2275e-07	L	Lost
chr1	13042159	13042903	369.532	76.4104	124.52	28.5614	119.779	20.9142	13042504	13042490	13042501	+	6.47368	4.24069	-2.26829	1.9724	6.13095e-52	5.30791e-11	6.95173e-11	2.36411e-50	6.75594e-10	2.79527e-10	BA	Book
chr1	13049771	13050358	101.308	10.9981	42.543	4.1498	46.1292	0	13049956	13050161	13050172	-	6.87719	3.09333	-3.17986	-0.0865363	2.12548e-26	2.72737e-12	0.839166	9.85032e-26	5.02431e-11	0.873265	L	Lost
chr1	13061483	13061915	58.713	11.3858	43.724	5.11392	43.3011	0	13061593	13061644	13061655	+	7.26316	3.66796	-2.37774	1.29022	8.95489e-26	5.12291e-07	0.00507592	3.92795e-25	2.01245e-06	0.00878288	L	Lost
chr1	13063527	13065327	252.35	82.3099	53.2755	18.7213	38.3463	7.05287	13064109	13064118	13064129	+	13.7193	2.8499	-1.62244	1.22746	2.72431e-21	1.86449e-05	0.000118603	7.9222e-21	4.77492e-05	0.000251945	L	Lost
chr1	13070799	13071311	75.3636	15.3468	37.9055	6.85341	20.4155	0	13071187	13071200	13071211	-	9.14035	2.33198	-2.36755	-0.0355719	2.70314e-13	2.69223e-07	0.931544	3.79848e-13	1.14538e-06	0.947943	L	Lost
chr1	13073544	13073896	74.1066	16.0177	43.2861	7.62369	42.4845	0	13073714	13073714	13073725	-	4.05263	3.2257	-2.22509	1.00061	2.07457e-26	9.69767e-08	0.0110325	9.62092e-26	4.7029e-07	0.0181837	L	Lost
chr1	13074588	13075600	392.188	36.7667	94.9188	8.78166	84.7625	0	13075208	13075444	13075455	+	1.07018	3.79031	-3.42941	0.3609	1.50584e-27	5.72677e-14	0.354763	7.75383e-27	1.68394e-12	0.42975	L	Lost
chr1	13084985	13085323	57.5793	15.9182	32.9488	7.91191	19.2659	0	13085124	13085152	13085163	+	6.35088	2.29809	-1.83611	0.461983	8.72113e-11	0.000144285	0.281602	1.03644e-10	0.000302579	0.350948	L	Lost
chr1	13090495	13091747	253.046	113.57	71.5689	38.4016	68.1074	19.3784	13090996	13091051	13091062	+	16.5614	3.05613	-1.15974	1.89638	2.081e-31	0.00033761	5.79374e-12	1.49829e-30	0.0006587	2.6043e-11	BA	Book
chr1	13093559	13094722	248.231	106.428	67.0169	23.5419	42.1669	11.151	13094419	13094410	13094421	-	6.66667	2.79701	-1.22449	1.57252	4.24626e-22	0.000684358	2.02284e-07	1.33107e-21	0.00125873	5.75267e-07	BA	Book
chr1	13095253	13095902	83.6724	40.1411	23.7356	11.3858	12.3867	2.10725	13095581	13095411	13095422	+	6.70175	2.04188	-1.06871	0.973169	1.05541e-10	0.00820955	0.00487684	1.2485e-10	0.012472	0.00845826	L	Lost
chr1	13105197	13105574	48.6998	20.068	22.8882	8.58782	18.5624	2.69017	13105476	13105453	13105464	+	16.9298	2.40478	-1.27206	1.13272	1.86354e-13	0.00288453	0.00322202	2.65038e-13	0.00474665	0.00572964	L	Lost
chr1	13117972	13118967	262.268	134.508	95.3283	57.7095	95.1449	39.4124	13118157	13118333	13118344	-	14.5789	3.21815	-0.966332	2.25182	2.66418e-33	0.00310775	5.45192e-16	2.2522e-32	0.00508635	3.7171e-15	BA	Book
chr1	13121680	13122419	151.198	25.9522	55.4511	8.20013	57.4286	0	13122275	13121868	13121879	-	17.9123	3.30696	-2.5279	0.779058	1.45019e-35	3.26517e-12	0.0188971	1.48669e-34	5.8747e-11	0.0300442	L	Lost
chr1	13136421	13136978	96.609	30.1964	39.9958	15.9182	26.665	6.28337	13136787	13136758	13136769	-	17.3158	2.66076	-1.66398	0.996778	1.18156e-16	6.48791e-05	0.00632375	2.22299e-16	0.000145701	0.0107847	L	Lost
chr1	13206233	13206953	64.9315	20.4557	20.3932	7.14163	12.751	0	13206734	13206686	13206697	+	8.85965	1.67504	-1.67508	-4.27408e-05	7.76358e-10	1.59733e-05	0.999901	8.7811e-10	4.16364e-05	0.999901	L	Lost
chr1	13445580	13446148	73.3968	6.94779	37.5435	2.50977	47.4233	0	13445864	13445720	13445731	+	3.78947	3.45177	-3.43211	0.0196632	2.34844e-25	2.45432e-10	0.969907	9.92769e-25	2.56648e-09	0.97743	L	Lost
chr1	13484663	13485138	68.3071	20.9377	30.0158	8.78166	20.6046	0	13484869	13484866	13484877	-	4.70175	2.49765	-1.71072	0.786934	1.41129e-18	1.00999e-05	0.0258594	3.18476e-18	2.76923e-05	0.0401853	L	Lost
chr1	13515185	13516133	131.719	26.5337	46.2997	7.23601	45.1914	0	13515739	13515749	13515760	-	11.2632	2.6711	-2.31397	0.35713	5.40159e-26	6.77827e-11	0.26437	2.41683e-25	8.39136e-10	0.332114	L	Lost
chr1	13650218	13651394	186.443	95.2363	102.809	23.5419	138.852	16.5268	13650896	13650915	13650926	+	10.0877	3.30699	-0.972063	2.33493	1.77229e-23	0.0160786	9.97171e-12	6.294e-23	0.0232257	4.37114e-11	BA	Book
chr1	13769910	13770524	122.454	81.3407	47.0807	31.26	38.2433	25.7019	13770140	13770117	13770128	-	16.1579	3.54079	-0.593899	2.94689	2.50463e-33	0.0822474	8.35455e-22	2.11997e-32	0.104622	1.07629e-20	BS	Book
chr1	13776975	13777393	39.2052	69.7559	22.0976	37.5369	12.9329	16.2238	13777149	13777116	13777127	+	17.0877	1.24401	0.834936	2.07895	6.77257e-05	0.0242764	8.13063e-12	6.8279e-05	0.0339419	3.6032e-11	BM	Book
chr1	13785248	13785564	52.047	16.3059	36.2106	8.58782	32.6523	0	13785416	13785374	13785385	-	6.98246	2.58052	-1.67388	0.906647	5.27766e-16	0.000107037	0.0222686	9.37628e-16	0.000230492	0.0349947	L	Lost
chr1	13836515	13837248	165.345	19.9736	104.541	6.17751	90.5357	0	13836792	13836767	13836778	+	5.49123	3.49125	-3.06096	0.430293	9.18368e-37	6.21875e-15	0.233738	1.0336e-35	2.41167e-13	0.297771	L	Lost
chr1	13990886	13992140	236.038	42.6458	92.8048	8.20013	125.594	0	13991343	13991454	13991465	+	12.193	3.37461	-2.46691	0.907708	2.30531e-40	1.67064e-13	0.00229224	3.53484e-39	4.34071e-12	0.00415416	L	Lost
chr1	14042095	14043284	107.531	127.759	31.6823	34.1574	38.498	23.7632	14042998	14042980	14042991	+	16.3333	3.14423	0.243101	3.38733	1.92115e-28	0.454304	3.14355e-32	1.06668e-27	0.498123	1.38353e-30	BS	Book
chr1	14091153	14091582	56.1895	16.8823	31.2396	8.20013	25.1952	0	14091366	14091347	14091358	+	11.6667	2.71942	-1.7073	1.01211	1.85279e-17	6.9988e-05	0.0103271	3.75796e-17	0.000156059	0.0171007	L	Lost
chr1	14215526	14215970	45.019	8.48835	21.2691	4.24418	16.8238	0	14215779	0	0	0	0	2.57612	-2.3483	0.227819	5.01729e-13	9.34171e-06	0.643013	6.91715e-13	2.58896e-05	0.706723	L	Lost
chr1	14221180	14221705	54.5894	19.7798	26.2543	10.2278	16.5347	0	14221492	14221494	14221505	+	14.3158	2.12806	-1.46801	0.660051	1.02174e-12	0.000306972	0.0706748	1.37402e-12	0.00060305	0.101378	L	Lost
chr1	14282126	14283041	128.306	24.2229	47.514	6.85341	46.7643	0	14282520	14282977	14282988	-	6.59649	2.50062	-2.44618	0.0544394	5.77029e-24	8.19459e-12	0.866536	2.14297e-23	1.31102e-10	0.89566	L	Lost
chr1	14411088	14411384	37.4676	7.14163	24.1167	5.01954	32.4147	0	14411272	14411321	14411332	-	1.96491	3.60606	-2.446	1.16006	1.07845e-16	4.49381e-05	0.0459061	2.03815e-16	0.00010476	0.0682139	L	Lost
chr1	14459188	14459399	26.2496	4.1498	22.5024	3.18567	16.6321	0	14459292	14459320	14459331	+	10.2456	2.85506	-2.72498	0.130085	1.71598e-13	3.48152e-05	0.839654	2.4479e-13	8.34016e-05	0.873638	L	Lost
chr1	14695636	14696225	60.3984	22.3839	22.0596	9.26372	11.8267	0	14695850	14695858	14695869	-	16.5614	2.13635	-1.42772	0.708628	5.66555e-13	0.000343185	0.0461937	7.7777e-13	0.000668808	0.0686172	L	Lost
chr1	14703793	14704235	19.5836	61.4614	8.31822	21.6136	4.64041	10.8575	14703879	14703988	14703999	-	17.9123	1.11202	1.64923	2.76124	0.00120473	1.55134e-05	1.44702e-19	0.00120829	4.05747e-05	1.44928e-18	BM	Book
chr1	14733221	14733416	36.2296	3.28005	35.8153	3.28005	26.1884	0	14733319	14733343	14733354	+	6.07018	7.76397	-3.42935	4.33463	7.68562e-21	8.76908e-07	1.65937e-05	2.1433e-20	3.22314e-06	3.88595e-05	L	Lost
chr1	14746044	14746568	60.8079	19.2977	27.9066	5.98367	26.3287	0	14746308	14746460	14746471	+	8.45614	2.24327	-1.66288	0.580393	1.22897e-13	6.1518e-05	0.119604	1.77457e-13	0.000138925	0.163689	L	Lost
chr1	14747007	14747550	77.4823	18.1398	35.3963	6.75395	23.2152	0	14747433	14747408	14747419	+	0.894737	2.16501	-2.10045	0.0645638	1.93929e-12	1.27423e-06	0.867206	2.56123e-12	4.45942e-06	0.896205	L	Lost
chr1	14909203	14909790	72.0069	53.8428	20.8216	17.6577	18.8833	3.62723	14909639	14909558	14909569	+	16.1228	2.20574	-0.428112	1.77763	1.78916e-14	0.224892	5.65164e-09	2.77703e-14	0.263129	1.87888e-08	L	Lost
chr1	15662939	15663489	43.7098	16.5941	20.8169	6.27189	17.7551	0	15663059	15663298	15663309	+	13.0175	1.99362	-1.38471	0.608914	1.90392e-08	0.00366009	0.147713	2.03508e-08	0.00591165	0.197835	L	Lost
chr1	15743758	15744379	106.274	15.4361	59.5936	6.27189	64.1386	0	15744032	15744035	15744046	+	6.87719	4.30678	-2.76509	1.54169	4.34146e-40	8.77964e-11	0.00021194	6.4841e-39	1.04901e-09	0.000436816	L	Lost
chr1	15760784	15761202	57.4038	19.7798	22.8929	10.2278	21.3686	2.31642	15760991	15761024	15761035	+	16.5614	2.62083	-1.54008	1.08075	2.92501e-12	0.00157588	0.0122432	3.81585e-12	0.00271581	0.0200457	L	Lost
chr1	15778675	15779874	101.937	26.9214	27.9019	5.8842	24.1444	0	15779515	15778821	15778832	-	5.80702	2.69773	-1.93045	0.767289	7.26313e-15	2.11258e-05	0.0523019	1.16529e-14	5.33777e-05	0.0768728	L	Lost
chr1	15781768	15782261	72.9066	17.5633	25.4164	9.45756	16.9429	0	15782048	15782005	15782016	-	5.45614	2.89909	-2.08559	0.813507	6.03e-20	1.4783e-06	0.0404885	1.5409e-19	5.07828e-06	0.0608295	L	Lost
chr1	15792579	15793017	37.8344	18.6269	20.3647	8.9755	22.6683	0	15792913	15792960	15792971	+	6.47368	2.42349	-1.06129	1.3622	5.13345e-09	0.0435795	0.00329124	5.59999e-09	0.05836	0.00584632	L	Lost
chr1	15805475	15805797	35.0248	4.72624	20.0169	3.08621	16.6615	0	15805596	15805470	15805481	-	0.736842	3.04422	-2.80782	0.236402	4.86458e-16	4.28049e-06	0.690077	8.66736e-16	1.29583e-05	0.748007	L	Lost
chr1	15818300	15819285	145.276	27.4979	39.9768	7.91191	30.8109	0	15818807	15818776	15818787	-	13.7193	3.21277	-2.39955	0.813227	4.48809e-31	1.30062e-10	0.0160138	3.1388e-30	1.47853e-09	0.0257192	L	Lost
chr1	15925739	15926121	71.6211	19.3972	36.6675	9.6514	25.1952	0	15925907	15925919	15925930	-	13.5614	2.95587	-1.9192	1.03668	4.96863e-21	4.99136e-06	0.00727981	1.40829e-20	1.48468e-05	0.0123064	L	Lost
chr1	15969604	15969999	83.7435	16.7879	48.752	6.56011	42.1295	0	15969756	15969931	15969942	+	11.6491	3.4429	-2.31334	1.12956	1.36865e-31	8.48657e-09	0.0031731	9.98548e-31	5.651e-08	0.00564945	L	Lost
chr1	16084014	16084403	52.4945	50.4684	30.8348	24.5111	22.116	13.8902	16084223	16084189	16084200	+	17.8772	2.89427	-0.0698398	2.82443	1.55472e-17	0.857823	7.41016e-16	3.17598e-17	0.875523	4.97426e-15	BS	Book
chr1	16106541	16106886	42.9477	9.55194	24.1783	3.28005	19.7576	0	16106744	16106743	16106754	+	0.754386	3.11077	-2.16693	0.94384	1.26495e-16	3.39635e-05	0.0564185	2.37344e-16	8.15397e-05	0.0824341	L	Lost
chr1	16120111	16120351	42.086	7.23093	28.3541	4.33856	20.511	0	16120218	16120234	16120245	+	-0.45614	2.34212	-2.38584	-0.0437229	2.02385e-10	1.78847e-05	0.931907	2.35795e-10	4.59828e-05	0.948222	L	Lost
chr1	16286238	16286548	39.5958	14.7653	25.4401	6.17751	30.5688	0	16286418	16286426	16286437	+	16.1228	2.77704	-1.46697	1.31006	3.19723e-16	0.00104347	0.0018134	5.78622e-16	0.00185675	0.00333356	L	Lost
chr1	16508641	16509030	29.9731	79.0247	15.8174	36.7616	6.85493	32.2782	16508837	16508803	16508814	+	12.4912	1.95674	1.39798	3.35472	0.00753837	0.115244	3.47155e-06	0.00754726	0.142675	8.74537e-06	BM	Book
chr1	16640585	16640914	52.8565	8.10575	39.5246	5.30776	52.5779	0	16640760	16640719	16640730	-	8.91228	3.57535	-2.73599	0.839361	2.62615e-24	1.20302e-07	0.0969963	1.00693e-23	5.66813e-07	0.135392	L	Lost
chr1	16671991	16672644	97.0517	59.9158	35.4248	17.8515	31.86	11.1471	16672382	16672429	16672440	+	17.3158	3.20356	-0.693364	2.5102	1.99982e-31	0.0316091	1.35067e-17	1.44199e-30	0.0433161	1.09594e-16	BA	Book
chr1	16677802	16678036	28.3256	5.59598	20.0074	3.76211	12.2663	0	16677930	16677878	16677889	+	7.66667	2.14997	-2.33292	-0.182942	1.61779e-10	4.0343e-05	0.734843	1.89507e-10	9.51526e-05	0.785863	L	Lost
chr1	16782626	16783411	74.5446	22.4783	24.5831	5.11392	21.9084	0	16783120	16783114	16783125	+	10.1579	2.58969	-1.711	0.878692	1.31376e-16	3.90642e-05	0.0182481	2.46106e-16	9.24191e-05	0.0290902	L	Lost
chr1	16814018	16814497	99.1657	11.4802	57.0892	4.43802	46.9503	0	16814350	16814374	16814385	+	2.24561	3.14862	-3.08276	0.0658633	6.74681e-25	2.6567e-11	0.878514	2.72547e-24	3.69164e-10	0.905328	L	Lost
chr1	17135347	17135778	47.8903	14.2833	22.5403	6.17751	16.8884	0	17135464	17135584	17135595	-	0.947368	2.22705	-1.78852	0.438533	1.04205e-09	0.000366672	0.327603	1.17179e-09	0.000710785	0.40066	L	Lost
chr1	17197545	17197862	92.5187	14.2782	74.192	11.192	61.1722	3.11747	17197745	17197756	17197767	-	9.92982	3.99767	-2.67433	1.32334	3.4724e-33	1.97053e-09	0.00199566	2.90649e-32	1.57147e-08	0.00364844	L	Lost
chr1	17240149	17241622	322.452	65.8051	125.015	10.5161	115.934	4.64491	17240931	17240923	17240934	-	12.4561	3.94753	-2.29575	1.65178	1.80587e-43	1.38697e-10	1.14648e-07	3.56893e-42	1.55996e-09	3.35116e-07	L	Lost
chr1	17836545	17837293	57.4655	24.1183	20.0169	10.5161	16.6362	3.87531	17836924	17836920	17836931	+	12.9123	2.29304	-1.23267	1.06037	1.52016e-14	0.00160714	0.00244573	2.37265e-14	0.00276533	0.00441724	L	Lost
chr1	17972824	17973075	35.3916	4.43802	27.9019	3.47389	21.4364	0	17972942	17972828	17972839	+	3.42105	5.58177	-2.97852	2.60325	1.3814e-22	2.31297e-06	0.00052378	4.52244e-22	7.53007e-06	0.00102945	L	Lost
chr1	18213553	18213917	37.0533	6.94779	21.6691	2.79799	20.0325	0	18213759	18213672	18213683	+	0.22807	2.91379	-2.44763	0.466155	5.68751e-17	5.62235e-06	0.370714	1.10365e-16	1.64795e-05	0.446142	L	Lost
chr1	18277195	18277962	185.399	19.0988	97.5039	4.24418	106.561	0	18277576	18277307	18277318	-	10.4035	4.89721	-3.23785	1.65936	1.12933e-44	4.2515e-13	8.30438e-05	2.47715e-43	9.7477e-12	0.000179783	L	Lost
chr1	19222812	19223563	116.583	48.6244	56.637	13.4084	68.4656	10.5337	19223153	19223121	19223132	-	15.1404	3.31653	-1.25329	2.06324	1.27063e-27	0.000746412	4.6937e-10	6.59171e-27	0.00136473	1.73612e-09	BA	Book
chr1	20119603	20120017	64.9836	8.39397	46.2712	3.47389	48.0457	0	20119728	20119746	20119757	+	12.5614	4.13919	-2.94688	1.19231	4.22673e-29	1.25432e-08	0.02018	2.49133e-28	7.89713e-08	0.0319314	L	Lost
chr1	20534178	20534834	70.8923	33.5708	20.8406	8.48835	11.2283	3.41126	20534773	20534768	20534779	+	9.80702	2.50627	-1.05652	1.44975	3.20671e-15	0.00834108	3.7939e-05	5.30202e-15	0.0126565	8.5325e-05	L	Lost
chr1	20562576	20563689	95.0089	135.263	27.9161	31.4538	28.0437	33.6932	20563214	20563240	20563251	+	16.3509	2.79854	0.512642	3.31118	2.23977e-19	0.15684	1.49102e-26	5.43182e-19	0.189404	3.32424e-25	BS	Book
chr1	20749674	20750188	67.4691	23.3481	28.7351	9.45756	17.3636	0	20749840	20749885	20749896	+	15.3333	1.95355	-1.5213	0.432247	3.11292e-12	7.44404e-05	0.204642	4.05258e-12	0.000165237	0.264508	L	Lost
chr1	20750299	20751991	276.642	68.6031	61.2174	11.8679	58.4273	4.97515	20750793	20751246	20751257	+	8.38596	3.40607	-2.01451	1.39156	7.03803e-36	4.86869e-09	2.91188e-06	7.40991e-35	3.47297e-08	7.39256e-06	L	Lost
chr1	20857241	20858435	293.264	46.4079	97.9656	11.8679	101.432	0	20857606	20857782	20857793	+	14.807	3.50274	-2.65662	0.846115	1.30357e-36	2.02704e-13	0.00731817	1.44792e-35	5.14846e-12	0.0123675	L	Lost
chr1	20898615	20899185	182.715	19.4916	81.9964	8.10575	105.92	0	20898795	20898783	20898794	-	13.7193	3.80564	-3.24223	0.563408	8.77612e-34	7.8189e-14	0.153005	7.74714e-33	2.2221e-12	0.204221	L	Lost
chr1	20902899	20903816	104.103	31.7471	27.4876	8.10575	28.9517	2.70248	20903250	20903280	20903291	-	8	2.83608	-1.73057	1.10551	2.03859e-24	1.97479e-06	0.000722732	7.89946e-24	6.54976e-06	0.00139621	L	Lost
chr1	20915161	20915533	38.3435	10.3222	24.1689	6.07804	18.4369	0	20915439	20915478	20915489	+	4.05263	2.62755	-1.8567	0.770847	4.30448e-15	9.61688e-05	0.0856357	7.04228e-15	0.000209145	0.120842	L	Lost
chr1	20925239	20926168	89.0529	31.5533	33.2824	9.45248	39.0558	0	20925759	20925731	20925742	+	12.5088	2.51876	-1.50729	1.01148	1.52345e-14	0.000366648	0.00604305	2.37755e-14	0.000710778	0.010339	L	Lost
chr1	20944790	20945372	59.9367	8.39397	29.5731	3.95596	23.0701	0	20945114	20945207	20945218	+	7.89474	2.63855	-2.83022	-0.191672	1.43713e-17	1.45364e-08	0.683561	2.94642e-17	8.98479e-08	0.742201	L	Lost
chr1	20964056	20965457	394.368	75.7396	104.127	19.9736	108.602	8.49794	20964945	20964898	20964909	-	9.24561	3.95629	-2.37957	1.57672	3.034e-38	5.4007e-10	1.4721e-06	3.87186e-37	5.12335e-09	3.84696e-06	L	Lost
chr1	21070101	21070722	161.616	49.2059	75.8158	24.7993	60.7883	13.9856	21070546	21070601	21070612	+	5.63158	3.51729	-1.71347	1.80382	4.10061e-24	7.04791e-05	1.36873e-06	1.54555e-23	0.000157082	3.58705e-06	BA	Book
chr1	21091558	21092192	97.7758	32.2292	36.2058	10.5161	32.7139	2.10725	21091805	21091792	21091803	+	11.3158	2.47486	-1.61506	0.859803	3.37597e-17	2.7276e-05	0.0110767	6.68672e-17	6.69772e-05	0.0182531	L	Lost
chr1	21196262	21196528	32.5155	4.8257	21.6928	4.1498	11.781	0	21196445	21196333	21196344	-	2.64912	2.11329	-2.83509	-0.721806	9.98153e-10	5.63786e-06	0.223296	1.12306e-09	1.65207e-05	0.285767	L	Lost
chr1	21229913	21230540	55.4037	11.674	20.0169	3.95596	16.9592	0	21230191	21230114	21230125	-	13.2456	2.28686	-2.23695	0.0499133	1.2061e-09	2.70817e-05	0.916528	1.35259e-09	6.65481e-05	0.936115	L	Lost
chr1	21238024	21238433	71.5974	12.0566	39.9626	5.49652	41.6778	0	21238208	21238205	21238216	+	4.42105	2.71797	-2.50098	0.216997	1.6571e-19	2.17759e-08	0.600694	4.05937e-19	1.28129e-07	0.66914	L	Lost
chr1	21243859	21244801	193.251	43.2273	90.0095	15.0535	78.8891	4.0495	21244213	21244154	21244165	-	10.2456	3.87236	-2.16638	1.70598	3.76499e-44	5.54362e-10	7.28425e-08	7.91067e-43	5.23842e-09	2.16423e-07	L	Lost
chr1	21246302	21248667	451.758	161.692	77.0728	20.7388	82.654	15.8883	21247152	21248320	21248331	-	13.9474	3.11524	-1.47855	1.63668	1.01526e-27	3.19127e-05	2.87538e-08	5.30829e-27	7.70632e-05	8.91379e-08	BA	Book
chr1	21249766	21250581	167.402	23.3531	94.133	6.65957	74.423	0	21250276	21250320	21250331	+	9.2807	3.09823	-2.86847	0.229756	1.13612e-27	5.44927e-13	0.519792	5.92197e-27	1.21332e-11	0.593196	L	Lost
chr1	21391921	21392629	68.2407	16.7879	31.6159	5.78982	29.4543	0	21392328	21392316	21392327	-	8.70175	2.13594	-2.01938	0.116562	4.06655e-10	1.99956e-05	0.78028	4.66104e-10	5.08431e-05	0.824451	L	Lost
chr1	21433879	21434509	50.409	75.9385	18.3456	30.783	20.7889	16.571	21434225	21434321	21434332	-	16.5614	2.56791	0.586615	3.15453	2.43826e-14	0.126172	4.32088e-21	3.74514e-14	0.155061	5.14458e-20	BS	Book
chr1	22283963	22284451	51.2232	5.40214	30.8253	2.60415	25.4311	0	22284256	22284285	22284296	-	6	2.94436	-3.20112	-0.256757	4.74834e-15	1.83262e-07	0.657889	7.73674e-15	8.15453e-07	0.719508	L	Lost
chr1	22473525	22473781	162.54	14.2782	154.617	13.7961	149.478	8.19248	22473663	22473535	22473546	-	5.73684	7.06004	-3.48741	3.57263	1.62391e-51	3.18508e-15	4.78349e-11	6.0223e-50	1.32288e-13	1.95446e-10	L	Lost
chr1	22473920	22474185	41.686	11.9622	29.1826	7.52423	27.053	0	22474016	0	0	0	0	2.9399	-1.77383	1.16607	3.9223e-13	0.00090356	0.0174478	5.44781e-13	0.00162733	0.0278837	L	Lost
chr1	22526335	22526944	89.1193	12.832	41.6338	4.24418	52.6852	0	22526559	22526634	22526645	+	6.61404	3.118	-2.7877	0.330295	4.98043e-26	2.13737e-10	0.421985	2.23428e-25	2.27806e-09	0.497922	L	Lost
chr1	23263626	23264540	226.453	148.89	110.336	52.1033	124.981	47.3042	23263850	23263823	23263834	-	14.7719	3.78711	-0.608908	3.1782	2.33127e-37	0.0828197	1.2053e-25	2.75059e-36	0.105311	2.42296e-24	BS	Book
chr1	23929271	23929517	31.6443	14.6659	24.5546	7.71807	16.3509	2.37046	23929354	23929322	23929333	+	5.59649	3.04683	-1.11174	1.93509	2.56779e-15	0.0182805	1.6562e-05	4.28487e-15	0.0261097	3.87907e-05	L	Lost
chr1	23950520	23951076	91.9479	16.9767	40.3673	5.30268	53.6585	0	23950783	23950817	23950828	+	16.1579	2.97037	-2.39444	0.575931	2.63773e-18	2.57596e-07	0.167838	5.78767e-18	1.10171e-06	0.221829	L	Lost
chr1	23975197	23975509	72.535	17.5633	48.752	9.74578	36.9585	0	23975379	0	0	0	0	2.81378	-2.0683	0.745478	7.82331e-12	0.00013599	0.116928	9.90406e-12	0.00028644	0.160363	L	Lost
chr1	24011686	24012492	106.961	118.684	42.8718	42.7503	47.1148	34.0558	24012116	24012079	24012090	-	13.7193	3.57967	0.146823	3.72649	4.27232e-29	0.684713	8.16803e-31	2.51688e-28	0.7174	3.07962e-29	BS	Book
chr1	24266921	24268058	226.567	271.719	95.8327	93.6064	108.163	95.7337	24267574	24267588	24267599	+	8.2807	4.29146	0.26109	4.55255	6.78665e-34	0.525531	9.34265e-38	6.04122e-33	0.567222	8.14972e-36	BS	Book
chr1	24416967	24417367	62.8934	6.56011	34.5726	2.99183	33.335	0	24417207	24417185	24417196	+	5.17544	3.29381	-3.22708	0.0667351	1.70681e-26	5.82304e-10	0.895298	7.9732e-26	5.47501e-09	0.918912	L	Lost
chr1	24463156	24463903	78.7156	182.561	29.5731	61.4716	27.4068	52.9862	24463496	24463433	24463444	+	13.9474	3.23341	1.21098	4.44439	3.38582e-27	0.000180237	2.31125e-52	1.69107e-26	0.000370687	1.00548e-49	BM	Book
chr1	24598214	24598683	24.5689	48.3463	8.75619	20.9428	4.64041	15.4958	24598294	24598429	24598440	+	11.193	2.01733	0.962211	2.97954	1.39962e-07	0.0252299	7.30097e-16	1.46201e-07	0.035178	4.90388e-15	BM	Book
chr1	24684305	24684814	97.3758	45.4387	52.8755	16.6885	54.1858	8.76316	24684597	24684626	24684637	+	14.7719	2.60697	-1.08661	1.52036	3.77233e-18	0.00385254	3.43315e-06	8.15172e-18	0.00620241	8.65507e-06	L	Lost
chr1	24826926	24827506	74.6158	8.00629	27.5113	3.28005	26.2185	0	24827202	24827123	24827134	-	6.59649	3.21746	-3.16724	0.0502241	2.13318e-20	3.14424e-09	0.92023	5.70502e-20	2.37255e-08	0.938907	L	Lost
chr1	24900575	24901157	49.5378	86.2608	22.4739	33.5759	24.2941	25.1078	24900850	24900863	24900874	-	17.0877	2.40426	0.797007	3.20127	9.11054e-15	0.0224435	7.06286e-26	1.44881e-14	0.0315509	1.46048e-24	BM	Book
chr1	24958325	24959045	75.3921	82.2997	18.3409	24.2178	16.2533	18.8148	24958842	24958928	24958939	-	10.1579	3.16436	0.128153	3.29251	2.33399e-24	0.714662	1.73077e-25	8.99173e-24	0.745439	3.4285e-24	BS	Book
chr1	24985675	24986372	42.4338	71.2021	13.7319	25.0875	16.9261	17.6621	24986068	24986069	24986080	+	17.3158	2.69429	0.748934	3.44323	5.93238e-11	0.111989	2.78142e-17	7.11696e-11	0.139005	2.19646e-16	BS	Book
chr1	24995996	24996348	52.0849	16.7879	27.9066	9.3581	24.9796	0	24996198	24996160	24996171	+	14.3158	3.42778	-1.62834	1.79945	8.20281e-25	9.8777e-05	9.25685e-06	3.29287e-24	0.000214282	2.22649e-05	L	Lost
chr1	25069548	25070009	58.3414	9.06988	21.2596	3.76211	15.4258	0	25069765	25069670	25069681	-	2.80702	3.11972	-2.69303	0.426682	2.50639e-22	3.68063e-08	0.361877	8.02125e-22	2.01671e-07	0.437229	L	Lost
chr1	25120555	25121061	49.1994	6.84833	26.2686	3.28005	26.7993	0	25120953	25120820	25120831	-	10.5789	3.21653	-2.7741	0.442429	7.67178e-19	4.82435e-07	0.401546	1.77552e-18	1.91037e-06	0.47754	L	Lost
chr1	25238645	25239388	128.772	12.0617	51.2849	3.28005	53.7248	0	25238904	25238964	25238975	+	1.54386	3.30841	-3.43585	-0.127432	3.46264e-29	4.38656e-14	0.763698	2.05883e-28	1.3231e-12	0.810714	L	Lost
chr1	25297135	25297820	32.8871	69.3683	9.98945	27.7912	6.97882	17.8378	25297563	25297575	25297586	+	18.1053	2.50961	1.08178	3.59138	4.0148e-13	0.00365338	3.25035e-27	5.57218e-13	0.00590165	7.86131e-26	BM	Book
chr1	25945036	25945472	61.7029	18.8157	40.4527	7.14163	43.8623	0	25945143	25945084	25945095	+	13.8421	3.16508	-1.72312	1.44196	1.65073e-20	8.88365e-05	0.000397145	4.46363e-20	0.000194458	0.000791608	L	Lost
chr1	26581431	26581937	48.3425	15.8187	21.6691	6.17242	11.8908	0	26581645	26581588	26581599	-	15.3333	1.69809	-1.55581	0.14228	6.05371e-08	0.000409714	0.715523	6.38269e-08	0.000786271	0.769592	L	Lost
chr1	26584612	26585108	67.9261	8.68219	32.5061	3.18567	37.0826	0	26584859	26584763	26584774	-	3.35088	3.31672	-2.93077	0.385949	1.50808e-22	9.75932e-09	0.426042	4.92054e-22	6.35142e-08	0.501885	L	Lost
chr1	27116454	27116933	47.9045	6.84833	24.1309	3.28005	31.144	0	27116605	27116605	27116616	-	10.2456	3.81954	-2.73237	1.08717	2.89146e-25	2.53655e-07	0.0401773	1.21086e-24	1.08609e-06	0.0603995	L	Lost
chr1	27828040	27828472	24.5689	41.6817	12.9177	20.2568	7.19514	16.5268	27828379	27828365	27828376	-	16.5614	2.89011	0.761909	3.65202	1.29935e-12	0.0738055	5.72483e-20	1.73517e-12	0.0946679	6.00126e-19	BM	Book
chr1	28709520	28710091	63.6602	23.825	33.7156	11.7684	38.9246	7.25611	28709767	28709747	28709758	+	14.4561	4.32654	-1.3798	2.94674	5.38219e-28	0.0017026	1.48513e-11	2.8843e-27	0.00291746	6.40179e-11	L	Lost
chr1	30012938	30013494	62.8649	78.632	25.4258	38.8837	25.5685	36.4314	30013208	30013174	30013185	+	14.1579	4.43434	0.325494	4.75983	7.94293e-31	0.385135	6.07567e-35	5.43841e-30	0.429527	3.78285e-33	BS	Book
chr1	30471887	30472243	45.0285	8.00629	28.3303	3.95596	26.7993	0	30472069	0	0	0	0	3.01832	-2.43385	0.584475	6.52876e-19	1.68687e-06	0.230708	1.52042e-18	5.70161e-06	0.294286	L	Lost
chr1	30861906	30862419	69.1309	10.2278	33.3298	4.63186	25.5292	0	30862010	30861983	30861994	-	3.5614	2.88587	-2.76687	0.119001	5.08397e-21	4.87302e-09	0.789043	1.43978e-20	3.47533e-08	0.831561	L	Lost
chr1	30904571	30905623	99.104	22.2845	27.5018	4.72624	18.8533	0	30904758	30905550	30905561	+	8.45614	2.24399	-2.12924	0.114753	4.73117e-13	5.85609e-07	0.75908	6.53437e-13	2.26146e-06	0.806622	L	Lost
chr1	30906297	30907063	75.3114	25.3758	21.6549	6.07804	23.3012	0	30906686	30906895	30906906	+	8.35088	2.33073	-1.57109	0.759643	5.93546e-14	0.000133832	0.0363551	8.80125e-14	0.000282367	0.0550854	L	Lost
chr1	30945961	30946468	37.4723	45.9309	14.1652	22.8711	10.6928	14.9713	30946164	30946279	30946290	-	8.82456	2.7074	0.285698	2.9931	2.1003e-12	0.514623	1.4615e-14	2.76828e-12	0.556633	8.55203e-14	BS	Book
chr1	30987504	30987911	54.5515	12.2505	29.9731	4.72624	18.0577	0	30987745	30987777	30987788	+	6.17544	2.32985	-2.11062	0.219226	2.18361e-10	4.18685e-05	0.634574	2.53929e-10	9.8252e-05	0.699396	L	Lost
chr1	30994166	30994916	136.685	42.0693	43.7145	13.2197	44.5092	4.33204	30994478	30994381	30994392	-	9.73684	2.88925	-1.70613	1.18312	1.4531e-28	4.13611e-07	8.01971e-05	8.16358e-28	1.66529e-06	0.000173942	L	Lost
chr1	31047359	31048057	57.4844	52.7792	22.0881	15.8238	20.7889	9.15121	31047694	31047701	31047712	+	14.5789	3.26303	-0.125725	3.13731	4.25662e-16	0.785807	2.20102e-14	7.62175e-16	0.810406	1.26503e-13	L	Lost
chr1	31207017	31207636	59.0608	58.768	21.1979	18.6269	28.6399	11.3632	31207407	31207458	31207469	+	16.3333	2.57062	-0.0168131	2.55381	1.32572e-11	0.970379	4.41493e-11	1.65455e-11	0.974226	1.80845e-10	BS	Book
chr1	31392133	31392709	61.2032	14.472	28.7161	5.40214	33.5975	0	31392369	31392641	31392652	-	-0.22807	2.60881	-2.07066	0.538153	7.74004e-17	2.83435e-06	0.185295	1.4821e-16	8.9974e-06	0.242139	L	Lost
chr1	32933584	32934141	59.6079	40.1411	27.0781	13.7017	23.7839	5.77328	32933910	32933898	32933909	-	18.1053	2.92095	-0.579302	2.34165	1.08096e-17	0.153113	1.09678e-10	2.23824e-17	0.18516	4.32252e-10	L	Lost
chr1	33160801	33161281	53.2755	39.4652	24.9831	16.7879	19.3392	10.1377	33160981	33160996	33161007	+	17.0877	2.72651	-0.44109	2.28542	1.62748e-15	0.27903	2.82435e-10	2.76223e-15	0.320385	1.06677e-09	BS	Book
chr1	33279652	33280605	87.486	106.428	34.1631	38.2078	29.6649	23.3053	33280085	33280066	33280077	-	15.5614	2.19529	0.279022	2.47431	7.14909e-17	0.370437	1.2358e-20	1.37383e-16	0.414674	1.40155e-19	BS	Book
chr1	33292793	33293459	56.2749	65.6112	17.9124	22.8711	13.3449	16.9671	33293110	33293123	33293134	+	16.3333	2.40389	0.219383	2.62327	1.49417e-16	0.514719	7.70836e-19	2.7848e-16	0.556702	7.09432e-18	BS	Book
chr1	33451400	33452362	79.1488	117.72	28.3256	44.1914	26.4282	36.0478	33451880	33451860	33451871	-	14.3158	2.57569	0.568085	3.14377	7.19688e-21	0.0706507	1.40537e-30	2.01113e-20	0.0908929	5.13332e-29	BS	Book
chr1	33559164	33559816	114.969	79.8052	42.9098	24.9932	45.902	13.9295	33559519	33559479	33559490	+	18.1053	3.37523	-0.539371	2.83586	3.19527e-32	0.10475	2.15991e-21	2.45583e-31	0.130732	2.67198e-20	BS	Book
chr1	33612460	33613239	158.797	19.5859	77.4966	6.07804	83.2972	0	33612726	33612740	33612751	-	13.4737	3.04151	-3.01506	0.0264506	5.65128e-24	1.51062e-12	0.94476	2.09992e-23	2.99066e-11	0.9578	L	Lost
chr1	33672526	33672867	41.6907	17.5633	20.0121	7.14163	15.1947	0	33672665	33672632	33672643	+	12.5088	2.06315	-1.28116	0.781982	5.16902e-11	0.00259674	0.0413928	6.22163e-11	0.0043059	0.0620727	L	Lost
chr1	33746862	33747339	54.6037	2.99183	22.9403	1.15796	20.9134	0	33747157	33747338	33747349	+	6.70175	2.53237	-4.2674	-1.73502	2.7312e-14	7.5999e-09	0.0150607	4.17393e-14	5.12391e-08	0.0242931	L	Lost
chr1	33758909	33759445	61.1795	41.6867	30.7779	20.6546	41.1841	12.8638	33759148	33759372	33759383	+	11.5263	2.99689	-0.568751	2.42813	1.19168e-20	0.132913	1.63115e-12	3.26713e-20	0.162714	7.74881e-12	BS	Book
chr1	33781849	33782525	58.7272	15.0535	21.2596	4.1498	12.5339	0	33782408	33782220	33782231	+	1.54386	1.89235	-1.99058	-0.0982224	6.01279e-11	3.11922e-06	0.799091	7.21063e-11	9.78774e-06	0.839725	L	Lost
chr1	33836367	33836834	56.6891	30.8723	29.1778	12.0617	26.2932	7.25611	33836514	33836507	33836518	+	17.3158	3.30137	-0.865723	2.43565	2.89972e-19	0.0463154	9.4042e-10	6.9661e-19	0.0616854	3.38294e-09	L	Lost
chr1	33859383	33860045	102.113	20.4557	38.7767	5.8842	31.5777	0	33859834	33859642	33859653	-	7	2.35068	-2.32758	0.023099	3.91249e-18	2.2998e-09	0.947509	8.43794e-18	1.80313e-08	0.9601	L	Lost
chr1	33887571	33887801	27.9493	3.76211	22.5261	3.28005	20.9134	0	33887661	0	0	0	0	3.28605	-2.83862	0.447432	3.50362e-14	3.98436e-05	0.508768	5.30633e-14	9.40988e-05	0.582811	L	Lost
chr1	33993193	33993903	75.8396	53.4501	27.5161	16.9818	25.6522	6.82975	33993610	33993529	33993540	+	16.5263	2.25068	-0.499068	1.75161	1.70314e-16	0.136763	2.03875e-09	3.15841e-16	0.167091	7.07299e-09	L	Lost
chr1	33996521	33996989	50.7568	16.5992	21.2169	6.46573	14.9437	0	33996833	33996784	33996795	-	16.3509	1.93116	-1.6559	0.275254	1.57345e-09	0.000211536	0.489791	1.75562e-09	0.000428849	0.564733	L	Lost
chr1	34002031	34002321	62.0412	13.3141	40.81	8.39397	28.1589	0	34002133	0	0	0	0	2.63626	-2.21102	0.425239	3.31248e-10	9.83624e-05	0.395858	3.81231e-10	0.000213464	0.472	L	Lost
chr1	34020841	34021755	212.392	49.5986	78.3108	14.5715	62.2394	5.34421	34021534	34021569	34021580	+	17.9123	3.04542	-2.112	0.933415	2.26497e-34	8.74473e-11	0.00113351	2.09649e-33	1.0458e-09	0.00213816	L	Lost
chr1	34122142	34122992	157.732	12.4494	57.4655	4.53748	53.279	0	34122677	34122617	34122628	-	7.47368	3.01134	-3.70813	-0.696788	3.24251e-21	2.30852e-14	0.113757	9.36331e-21	7.61274e-13	0.156387	L	Lost
chr1	34123274	34123528	41.6812	3.18567	31.2775	3.18567	27.8328	0	34123420	0	0	0	0	3.74553	-3.86669	-0.121159	4.19491e-22	1.53016e-07	0.869125	1.31607e-21	6.97702e-07	0.897669	L	Lost
chr1	34127586	34128480	183.629	54.5086	42.0623	17.0762	36.1833	9.29806	34128074	34128017	34128028	+	10.9474	3.13876	-1.74229	1.39646	4.97067e-30	6.04702e-07	4.69342e-06	3.16751e-29	2.32619e-06	1.1665e-05	L	Lost
chr1	34130251	34131138	168.621	53.7383	59.9415	15.2423	42.5536	6.97947	34130800	34130760	34130771	+	8.26316	2.67234	-1.6425	1.02984	5.33501e-23	2.28207e-06	0.000605752	1.81323e-22	7.44519e-06	0.00118098	L	Lost
chr1	34131309	34131800	142.989	9.16426	60.8696	4.92008	49.83	0	34131450	34131616	34131627	-	2.17544	3.27608	-3.9236	-0.647512	1.37746e-22	7.20878e-14	0.178611	4.51105e-22	2.06253e-12	0.23437	L	Lost
chr1	34153469	34154194	110.784	26.5337	47.933	7.33547	42.8394	0	34153939	34153915	34153926	-	13.2982	2.95766	-2.06428	0.893377	1.01105e-26	2.65854e-08	0.00798007	4.82733e-26	1.52308e-07	0.0134213	L	Lost
chr1	34159436	34161276	897.059	427.667	195.699	84.1387	179.653	71.2549	34160227	34160224	34160235	+	16.9298	4.23044	-1.07022	3.16023	8.34766e-48	0.00265728	7.01711e-27	2.35658e-46	0.00439807	1.62423e-25	BA	Book
chr1	34163432	34164395	226.633	59.2501	64.6358	12.9315	75.5633	6.3583	34164228	34164162	34164173	+	5.2807	3.37069	-1.94503	1.42566	6.60565e-24	3.70759e-06	6.88264e-05	2.44039e-23	1.13979e-05	0.000150351	L	Lost
chr1	34166047	34166308	31.6206	19.6803	22.0454	9.45248	15.6265	5.29339	34166203	34166178	34166189	-	5.57895	2.44715	-0.666497	1.78066	1.56072e-09	0.180841	5.91859e-05	1.74159e-09	0.215739	0.000130303	L	Lost
chr1	34184668	34185255	73.3541	15.3418	35.4485	6.56011	25.6611	0	34184898	34184899	34184910	+	2.15789	2.36761	-2.2667	0.10091	2.72536e-18	2.21473e-08	0.786963	5.97067e-18	1.30022e-07	0.829962	L	Lost
chr1	34190759	34191136	45.0237	8.10575	23.3451	3.66774	12.5799	0	34190916	34190872	34190883	+	9.14035	1.87663	-2.50459	-0.627959	1.35546e-09	9.96289e-07	0.185827	1.51723e-09	3.60378e-06	0.242685	L	Lost
chr1	34196556	34197217	125.482	24.5111	60.8981	7.81753	50.8788	0	34197093	34196571	34196582	-	6.91228	2.90328	-2.37754	0.525739	1.48727e-18	7.67037e-08	0.176774	3.34887e-18	3.83045e-07	0.232274	L	Lost
chr1	34213892	34214313	48.714	24.5111	23.7404	11.8679	16.875	2.55774	34213994	34214027	34214038	-	16.7193	2.6483	-1.01514	1.63316	1.04729e-14	0.0177059	2.30058e-05	1.65684e-14	0.0253583	5.30156e-05	L	Lost
chr1	34345890	34346446	67.0407	48.9177	29.5589	17.9459	22.3763	8.69914	34346046	34345955	34345966	+	15.5439	2.24507	-0.454396	1.79067	7.1435e-15	0.198424	5.89824e-09	1.14675e-14	0.234763	1.95741e-08	L	Lost
chr1	34515422	34516419	117.045	64.6522	29.5683	18.2392	22.2573	7.53497	34515979	34515892	34515903	-	16.3333	2.28439	-0.86927	1.41512	9.0769e-21	0.00463557	1.0802e-07	2.51578e-20	0.00734594	3.16531e-07	L	Lost
chr1	34525443	34525807	39.1625	9.3581	23.3356	4.05034	14.4	0	34525564	0	0	0	0	2.92611	-2.04469	0.881422	4.59073e-14	0.000142945	0.0797227	6.8782e-14	0.000300047	0.113218	L	Lost
chr1	34603889	34605346	245.303	61.3671	70.3499	9.55194	93.4234	3.46347	34604127	34604976	34604987	-	17.9123	3.64619	-2.0024	1.64379	1.10981e-32	1.72387e-07	7.03363e-07	8.8924e-32	7.72327e-07	1.89663e-06	L	Lost
chr1	34616071	34616508	40.8243	35.698	22.4834	18.2341	13.2228	8.69914	34616396	34616420	34616431	+	12.9298	2.50568	-0.18783	2.31785	2.20468e-15	0.610845	4.16103e-12	3.69896e-15	0.648372	1.89195e-11	L	Lost
chr1	34626616	34626919	46.5953	10.7099	28.2924	6.75395	29.4633	0	34626816	34626767	34626778	+	13.7544	2.68715	-2.12306	0.564093	9.79022e-13	5.82925e-05	0.243597	1.3183e-12	0.000132337	0.30894	L	Lost
chr1	34797343	34797875	60.7842	21.8075	30.7921	6.65957	33.1612	0	34797529	34797524	34797535	-	17.5439	2.47402	-1.49364	0.98038	3.81527e-15	0.000331493	0.00874001	6.27108e-15	0.000647621	0.014619	L	Lost
chr1	34857658	34858512	166.097	86.1664	57.856	25.3758	67.4834	14.4877	34858192	34858135	34858146	+	17.8772	2.89823	-0.952103	1.94613	2.39332e-29	0.00260577	1.24083e-12	1.44378e-28	0.00431915	5.95378e-12	BA	Book
chr1	34906467	34906949	41.6291	22.2896	24.5879	12.2556	17.7975	3.21205	34906675	34906617	34906628	-	8.87719	2.99568	-0.912634	2.08305	3.87427e-17	0.0331696	1.8427e-07	7.63447e-17	0.0452625	5.26421e-07	L	Lost
chr1	34909942	34910413	69.5878	14.0843	37.4723	5.11392	35.2873	0	34910086	34910040	34910051	-	12.4561	2.6683	-2.2687	0.399599	2.46701e-19	1.26792e-07	0.314083	5.96277e-19	5.92867e-07	0.386263	L	Lost
chr1	34917312	34917672	47.8713	48.4407	22.4786	22.866	20.6473	12.338	34917532	34917516	34917527	+	12.5614	2.34975	0.00454757	2.3543	7.9848e-14	0.990188	4.40123e-13	1.17162e-13	0.991532	2.2132e-12	BS	Book
chr1	34986103	34986378	25.3974	34.2518	16.2412	23.7357	10.3424	18.8148	34986235	34986312	34986323	+	9.70175	2.39271	0.432124	2.82483	8.04019e-08	0.39932	2.56112e-10	8.45165e-08	0.443786	9.72433e-10	BS	Book
chr1	35016743	35017370	71.2164	62.1323	32.9108	24.2178	25.6573	10.94	35016943	35016913	35016924	-	17.8772	2.57857	-0.190465	2.38811	3.4208e-19	0.575897	1.64994e-15	8.16818e-19	0.615299	1.06745e-14	BS	Book
chr1	35172359	35172954	84.2052	15.8238	43.7952	5.30776	40.9353	0	35172742	35172893	35172904	-	2	2.30317	-2.41557	-0.112395	6.57505e-17	4.2749e-09	0.764439	1.26775e-16	3.10289e-08	0.81125	L	Lost
chr1	35289079	35290829	375.209	81.2412	125.335	16.4997	139.799	8.29433	35289582	35289600	35289611	-	13.0175	3.61126	-2.20814	1.40312	3.6285e-34	3.15464e-09	9.35542e-06	3.29566e-33	2.37617e-08	2.24908e-05	L	Lost
chr1	35294966	35295506	50.3568	14.0843	24.5452	5.11392	23.0652	0	35295110	35295108	35295119	-	4.78947	2.91707	-1.8061	1.11097	8.46035e-17	0.000114111	0.0103731	1.61393e-16	0.00024419	0.0171703	L	Lost
chr1	35735014	35735485	33.3156	78.359	13.3367	33.581	7.01777	21.8019	35735207	35735113	35735124	-	16.5614	2.10626	1.22085	3.32711	5.62393e-10	0.00119872	8.79244e-25	6.40413e-10	0.0021102	1.59633e-23	BM	Book
chr1	35750322	35751730	166.987	100.932	44.6	28.3727	52.3318	22.762	35751391	35750398	35750409	-	17.9123	2.88356	-0.733043	2.15052	4.47018e-31	0.0152386	2.18477e-16	3.12692e-30	0.0220922	1.56141e-15	BA	Book
chr1	35754380	35755075	115.878	20.9377	52.5324	7.62369	60.9654	0	35754925	0	0	0	0	3.24468	-2.47317	0.771513	3.7934e-34	2.94054e-11	0.0260613	3.43899e-33	4.02831e-10	0.0404712	L	Lost
chr1	35772497	35773041	87.4575	55.6818	38.2818	21.3305	32.7742	12.1832	35772757	35772729	35772740	+	5	2.13942	-0.669494	1.46992	9.66402e-14	0.0617926	1.71177e-06	1.40839e-13	0.0804052	4.44317e-06	L	Lost
chr1	35807128	35807408	29.1446	10.6155	20.4074	5.5016	11.3296	0	35807302	0	0	0	0	2.35327	-1.50498	0.848282	2.48671e-11	0.00217553	0.0638841	3.05177e-11	0.00365692	0.0924072	L	Lost
chr1	35820092	35820894	94.4429	28.3676	34.9536	8.2996	40.3443	0	35820520	35820486	35820497	-	13.807	2.64362	-1.73973	0.903895	1.02399e-14	8.94412e-05	0.0195059	1.62142e-14	0.000195706	0.0309484	L	Lost
chr1	35827268	35827857	68.7831	26.3399	34.6058	9.84016	31.8072	3.80705	35827524	35827506	35827517	-	10.7719	2.85243	-1.38167	1.47076	1.24096e-20	0.000400978	3.47836e-05	3.39538e-20	0.000771425	7.85723e-05	L	Lost
chr1	35867767	35868272	56.6132	13.8012	27.0496	5.69545	22.6815	0	35867880	35868022	35868033	-	5.82456	2.23698	-2.09196	0.145029	9.8324e-12	9.24277e-06	0.733761	1.23736e-11	2.56405e-05	0.78517	L	Lost
chr1	35871333	35872236	105.299	89.7397	31.6396	24.4167	20.6641	12.727	35871819	35871853	35871864	-	15.1404	2.01235	-0.238297	1.77405	8.00494e-14	0.470884	1.98266e-10	1.17437e-13	0.514159	7.61576e-10	BS	Book
chr1	35879310	35879972	111.456	15.63	56.1563	4.63186	57.5022	0	35879411	0	0	0	0	2.56498	-2.8292	-0.26422	3.19514e-11	1.20881e-07	0.57099	3.89722e-11	5.68819e-07	0.641719	L	Lost
chr1	35888727	35889372	81.9537	22.0957	33.6919	11.8679	35.538	0	35888880	35888831	35888842	-	17.8772	2.85337	-1.89568	0.957699	3.59004e-17	2.12466e-05	0.0160225	7.09582e-17	5.3631e-05	0.025732	L	Lost
chr1	35898577	35899439	83.7293	41.0057	21.2311	11.674	12.4793	3.11747	35898733	35899241	35899252	-	16.9298	1.95705	-1.02879	0.928261	1.10936e-13	0.00258416	0.00176198	1.60775e-13	0.00428688	0.00324396	L	Lost
chr1	35907544	35908232	116.174	31.8415	38.7578	10.1335	31.0157	2.37857	35907948	35907991	35908002	+	5.59649	2.72276	-1.87325	0.849519	7.37018e-19	3.18297e-06	0.0159976	1.70863e-18	9.96933e-06	0.0256956	L	Lost
chr1	35912996	35913538	125.749	21.0372	72.0639	9.07496	57.0022	0	35913239	35913285	35913296	-	17.3158	3.07304	-2.61038	0.462664	1.61164e-28	2.38441e-11	0.195324	9.01841e-28	3.36255e-10	0.253943	L	Lost
chr1	35915274	35915850	64.9315	10.3222	26.2401	3.76211	22.0009	0	35915694	35915649	35915660	-	10.2456	2.42425	-2.61649	-0.192238	1.02603e-16	1.28119e-08	0.653516	1.94364e-16	8.03747e-08	0.71567	L	Lost
chr1	35973609	35974645	225.125	187.68	61.1605	45.255	57.0022	32.3101	35974083	35974115	35974126	+	14.3158	2.76327	-0.265126	2.49815	1.0469e-19	0.475179	5.45493e-16	2.61421e-19	0.518264	3.7184e-15	BS	Book
chr1	35987897	35988319	49.5473	9.3581	23.7594	3.76211	13.097	0	35988102	35988086	35988097	-	1.4386	1.98807	-2.38495	-0.396876	6.57772e-08	1.33535e-05	0.420526	6.92937e-08	3.55335e-05	0.496493	L	Lost
chr1	36001212	36001557	103.398	5.97858	68.4163	2.89237	60.8414	0	36001370	36001395	36001406	+	1.78947	3.10792	-3.98014	-0.872214	3.99217e-21	1.69846e-12	0.0994657	1.14231e-20	3.30292e-11	0.13852	L	Lost
chr1	36002907	36003788	99.8993	32.9051	30.8111	8.20013	24.1444	0	36003464	36003107	36003118	-	13.7544	2.79295	-1.6164	1.17654	5.60502e-19	6.21913e-05	0.000934936	1.31223e-18	0.000140296	0.00178201	L	Lost
chr1	36008466	36008906	130.725	16.4997	57.8418	6.75395	62.2039	0	36008791	36008525	36008536	+	17.3158	3.67146	-2.99559	0.67587	7.06594e-35	1.106e-12	0.0854816	6.83296e-34	2.294e-11	0.120649	L	Lost
chr1	36035346	36036244	145.304	33.7799	50.3995	10.5211	44.799	4.21182	36035769	36035764	36035775	+	8.87719	2.59192	-2.12995	0.461968	2.30967e-11	2.21497e-05	0.276745	2.84035e-11	5.56414e-05	0.345697	L	Lost
chr1	36070184	36072475	950.07	258.772	268.281	43.4161	191.93	33.0707	36071029	36072048	36072059	-	7.4386	3.93866	-1.8763	2.06237	3.30501e-56	1.19036e-09	9.46278e-16	1.81471e-54	1.01234e-08	6.28992e-15	BA	Book
chr1	36073969	36074723	148.065	30.6784	72.6252	7.52423	66.5784	0	36074230	36074568	36074579	-	4.26316	2.63366	-2.2556	0.378059	7.234e-18	3.31347e-08	0.287096	1.52193e-17	1.84503e-07	0.356956	L	Lost
chr1	36111104	36112225	330.294	107.686	99.4945	29.8189	89.743	16.8141	36111645	36111649	36111660	+	13.7193	3.54078	-1.62109	1.9197	2.35993e-34	6.07289e-06	2.73756e-10	2.17903e-33	1.76597e-05	1.03572e-09	BA	Book
chr1	36112736	36113277	69.5499	33.0989	23.3024	11.7735	15.3091	3.18306	36112910	36112904	36112915	-	17.0877	2.33011	-1.0913	1.23882	2.07391e-15	0.00368518	0.000189854	3.48784e-15	0.00595075	0.000393519	L	Lost
chr1	36117239	36118396	393.957	81.7284	103.832	21.0321	81.2145	8.33286	36118108	0	0	0	0	3.17422	-2.27298	0.901237	2.11804e-24	8.89719e-09	0.00645326	8.19795e-24	5.86686e-08	0.010989	L	Lost
chr1	36121382	36122338	149.227	59.9158	42.9287	18.91	33.2212	7.2353	36121783	36121871	36121882	+	2.07018	2.09589	-1.31455	0.781346	7.18779e-13	0.000434667	0.0132193	9.77961e-13	0.000829606	0.0215172	L	Lost
chr1	36124285	36125085	240.275	143.284	83.7435	38.6898	65.5382	21.2297	36124803	36124811	36124822	+	15.1404	3.39117	-0.747436	2.64373	1.15237e-40	0.0141171	9.7225e-24	1.81623e-39	0.0205868	1.56654e-22	BA	Book
chr1	36131132	36131454	54.5894	17.4639	27.0828	7.91191	17.8319	0	36131243	36131307	36131318	+	14.4035	2.14214	-1.64503	0.497106	8.27087e-12	0.000141924	0.199776	1.04519e-11	0.000298089	0.259027	L	Lost
chr1	36161343	36161639	36.6153	15.2423	20.3932	10.034	10.5939	0	36161448	36161508	36161519	+	12.9298	1.7346	-1.23912	0.495477	1.46418e-06	0.0108536	0.246189	1.49912e-06	0.0161525	0.311924	L	Lost
chr1	36161810	36162638	157.822	129.871	41.6385	30.4948	40.9121	21.731	36162464	36162477	36162488	+	16.5614	2.55249	-0.282196	2.2703	2.62137e-23	0.363787	7.60486e-18	9.16264e-23	0.407917	6.32941e-17	BS	Book
chr1	36235587	36235974	44.162	51.4274	20.4169	20.2618	15.2294	14.7973	36235800	36235826	36235837	+	14.7719	2.19617	0.217636	2.4138	1.45954e-12	0.547694	2.20441e-14	1.94093e-12	0.588726	1.26654e-13	BS	Book
chr1	36308342	36308602	45.8143	8.39397	33.3108	5.11392	27.3464	0	36308492	36308360	36308371	+	3.31579	2.67826	-2.44278	0.235473	3.73603e-14	4.30594e-06	0.635269	5.64346e-14	1.30272e-05	0.699934	L	Lost
chr1	36372376	36373260	132.829	48.6294	39.9958	11.192	26.185	0	36372777	36372527	36372538	+	9.29825	2.19074	-1.4517	0.739037	9.69608e-13	0.000237195	0.0274778	1.30625e-12	0.000476482	0.0425173	L	Lost
chr1	36424774	36425738	200.632	123.022	39.9673	25.8578	40.5256	11.5973	36425120	36425691	36425702	+	16.1228	3.32407	-0.70785	2.61622	1.67359e-38	0.0207384	9.74597e-23	2.19945e-37	0.0293435	1.38546e-21	BA	Book
chr1	36469709	36470565	84.1578	106.722	26.2496	30.2015	16.4471	13.7366	36470152	36470191	36470202	-	18.1053	1.91475	0.336521	2.25128	5.46071e-13	0.289353	3.65297e-17	7.5062e-13	0.331128	2.8476e-16	BS	Book
chr1	36474124	36475024	135.686	91.5838	29.1351	19.109	28.4263	10.9144	36474595	36474656	36474667	-	17.9123	2.46664	-0.578368	1.88827	1.80106e-14	0.144427	1.32197e-08	2.79538e-14	0.175563	4.24353e-08	BS	Book
chr1	36527581	36528227	97.4185	152.27	41.2148	48.3412	23.3215	32.0222	36527977	36528013	36528024	+	17.3158	3.00363	0.640521	3.64415	2.5054e-19	0.0988746	6.35939e-28	6.05181e-19	0.124034	1.67802e-26	BS	Book
chr1	36553508	36554070	54.9942	26.827	21.2738	8.9755	14.4732	0	36553670	36554065	36554076	+	13.7895	2.38501	-1.06086	1.32415	7.38344e-15	0.00683769	0.000163035	1.18381e-14	0.010536	0.000340447	L	Lost
chr1	36602228	36602574	64.0935	19.0095	39.5531	10.4217	37.0205	0	36602393	36602390	36602401	-	10.0877	2.90897	-1.77125	1.13772	2.99706e-18	5.69718e-05	0.00460175	6.54098e-18	0.000129651	0.0080098	L	Lost
chr1	36624497	36625102	69.9167	14.8597	21.2217	4.63186	16.5444	0	36624789	36625058	36625069	+	4.89474	2.47181	-2.24289	0.228923	2.72721e-08	0.000166074	0.657188	2.90183e-08	0.000344061	0.718938	L	Lost
chr1	36689511	36690044	81.1299	37.1442	32.8681	13.4084	31.7402	7.84321	36689736	36689632	36689643	-	17.8772	2.88427	-1.11921	1.76506	1.90281e-20	0.00370392	2.80122e-07	5.11713e-20	0.00597902	7.84337e-07	L	Lost
chr1	36748328	36749054	101.861	66.6799	40.7673	24.7993	47.5611	13.9295	36748726	36748744	36748755	-	14.5789	2.77069	-0.619235	2.15146	1.17519e-14	0.15737	7.34677e-09	1.8521e-14	0.189976	2.41428e-08	BS	Book
chr1	36763675	36764063	40.7816	42.8396	21.1884	18.6218	15.8361	7.43478	36763818	36763792	36763803	+	12.8596	1.83167	0.0700647	1.90174	1.06915e-06	0.877771	7.45128e-07	1.09675e-06	0.893195	2.00288e-06	L	Lost
chr1	36764738	36765099	73.7778	20.3613	42.9477	7.62369	31.8329	0	36764854	36764870	36764881	+	7.63158	2.30908	-1.8799	0.429177	3.58872e-12	2.98248e-05	0.28007	4.65203e-12	7.24753e-05	0.349282	L	Lost
chr1	36826698	36827122	83.3388	18.428	43.3382	11.4802	34.8646	4.0495	36826968	36826971	36826982	+	8.84211	3.04291	-2.17079	0.872119	7.5959e-23	2.47394e-07	0.0240128	2.54872e-22	1.0621e-06	0.0375132	L	Lost
chr1	36860857	36861492	90.438	11.2863	28.3114	3.28005	18.9362	0	36861060	36861153	36861164	+	2.64912	2.09599	-2.9574	-0.861406	6.11439e-13	1.44615e-10	0.0404763	8.36544e-13	1.61474e-09	0.0608188	L	Lost
chr1	36894688	36895062	43.7003	16.4003	21.6264	6.94779	22.0783	0	36894842	36894849	36894860	+	13.5614	2.32817	-1.38876	0.93941	2.76565e-13	0.00119435	0.0162113	3.88343e-13	0.00210291	0.0260155	L	Lost
chr1	36913146	36913459	44.5573	6.94779	26.6401	3.86158	22.1577	0	36913306	36913241	36913252	+	1.47368	2.32106	-2.71281	-0.391745	1.65948e-12	6.42015e-07	0.444123	2.20052e-12	2.45526e-06	0.520082	L	Lost
chr1	36940424	36941137	87.0385	24.7942	28.2876	6.17751	18.9176	0	36940934	36940646	36940657	+	15.1404	2.56986	-1.79757	0.772293	1.09848e-16	1.28165e-05	0.0345799	2.07532e-16	3.42388e-05	0.0525788	L	Lost
chr1	36981369	36982416	185.785	130.835	44.581	30.1071	37.973	19.6075	36981924	36981552	36981563	+	9.87719	3.48856	-0.506486	2.98208	2.1452e-41	0.0951025	7.01043e-29	3.60362e-40	0.119651	2.0332e-27	BS	Book
chr1	37000228	37001487	266.163	50.1751	64.5931	9.93962	36.7743	0	37000672	37001308	37001319	+	9.21053	2.46223	-2.41267	0.0495666	3.04371e-17	3.14389e-10	0.878806	6.05512e-17	3.19502e-09	0.905427	L	Lost
chr1	37001597	37002568	94.4429	56.248	20.3979	15.2423	13.9852	7.09004	37002307	37002329	37002340	+	17.8772	2.33165	-0.743676	1.58797	9.8147e-15	0.0468496	7.2495e-07	1.55678e-14	0.0623504	1.95282e-06	L	Lost
chr1	37019185	37020116	193.971	28.462	52.0612	6.65957	32.4212	0	37019762	37019282	37019293	+	9.73684	2.58609	-2.76319	-0.177101	1.02318e-21	2.3673e-13	0.593534	3.09388e-21	5.87204e-12	0.662731	L	Lost
chr1	37040429	37041381	173.419	83.9397	49.6042	19.0044	31.9362	8.9747	37040858	37040791	37040802	-	3.19298	2.48401	-1.04514	1.43887	2.21847e-17	0.00429793	3.04754e-06	4.4639e-17	0.00685636	7.71616e-06	L	Lost
chr1	37042579	37043161	579.191	88.2834	310.857	36.5677	229.63	24.2913	37042895	37042865	37042876	-	1.87719	4.8785	-2.71357	2.16493	4.38578e-70	1.09538e-15	2.97313e-13	6.73406e-68	5.02969e-14	1.51779e-12	BA	Book
chr1	37043726	37045760	541.815	117.809	156.127	13.8012	153.735	3.63617	37044827	37045521	37045532	-	9.77193	2.92002	-2.20176	0.718257	3.62419e-28	6.74948e-11	0.0106	1.96799e-27	8.35877e-10	0.0175176	L	Lost
chr1	37082874	37083160	41.2101	7.42985	26.6449	5.11392	19.7836	0	37082974	37082997	37083008	+	8.08772	2.28358	-2.48972	-0.206142	2.62045e-13	1.36425e-06	0.671986	3.68533e-13	4.73491e-06	0.73214	L	Lost
chr1	37105710	37106388	84.172	8.20013	32.0728	2.79799	26.9109	0	37106034	37106078	37106089	+	4.75439	3.2442	-3.32921	-0.08501	5.35906e-24	7.5539e-11	0.86044	1.99615e-23	9.2237e-10	0.890841	L	Lost
chr1	37161140	37161409	31.2301	13.6074	20.4121	10.1335	11.7438	2.31642	37161249	37161169	37161180	+	14.1579	2.35301	-1.24367	1.10934	5.03712e-11	0.00887306	0.0109834	6.0674e-11	0.013399	0.0181098	L	Lost
chr1	37164804	37165245	63.6887	38.5011	30.3779	15.0535	30.1389	3.73045	37164942	37164912	37164923	-	7.47368	2.45568	-0.738863	1.71682	1.0626e-16	0.0433246	1.1985e-07	2.00943e-16	0.0580301	3.49659e-07	L	Lost
chr1	37186701	37187622	508.971	61.4564	283.375	28.5564	199.184	19.204	37187092	37187081	37187092	+	9.49123	4.36891	-3.04474	1.32417	1.02476e-43	2.33231e-14	0.00010825	2.07849e-42	7.67625e-13	0.000231166	BA	Book
chr1	37267844	37268333	63.7409	15.63	25.8211	8.39397	18.3913	0	37268148	37268144	37268155	-	8.54386	3.46523	-2.02241	1.44282	3.99815e-18	8.19924e-05	0.00217761	8.61501e-18	0.000180665	0.00395868	L	Lost
chr1	37356342	37356677	38.7767	23.9296	23.3593	12.3499	11.1228	6.08846	37356590	37356626	37356637	-	4.84211	2.11924	-0.704694	1.41454	2.75382e-10	0.0958466	0.000159299	3.18469e-10	0.120516	0.000333014	L	Lost
chr1	37485796	37487005	155.67	208.622	45.7763	48.1525	49.7008	37.2415	37486619	37486034	37486045	+	13.9474	2.85437	0.418376	3.27275	3.78402e-26	0.188095	9.2227e-34	1.71846e-25	0.22356	4.97542e-32	BS	Book
chr1	37556586	37556757	26.2259	2.12209	25.3974	2.12209	19.1821	0	37556662	37556646	37556657	+	6.05263	3.1888	-3.55051	-0.361714	6.42277e-15	1.417e-05	0.655864	1.03541e-14	3.74508e-05	0.717756	L	Lost
chr1	37599553	37600536	163.126	27.5973	71.1784	7.23601	78.3211	0	37600059	37599720	37599731	+	14.3158	3.51808	-2.57425	0.943829	2.26925e-23	2.21405e-08	0.0193992	7.98282e-23	1.30004e-07	0.030795	L	Lost
chr1	37698219	37698778	109.984	15.5356	60.0174	5.98367	54.4858	0	37698494	37698481	37698492	+	7.15789	3.36425	-2.84443	0.519821	1.39038e-32	4.78081e-12	0.178785	1.10543e-31	8.20988e-11	0.23457	L	Lost
chr1	37700671	37701225	80.3868	19.4865	33.7393	7.71807	22.0641	0	37701058	37701059	37701070	-	7.49123	2.47479	-2.01003	0.464762	8.56192e-20	1.59963e-07	0.184079	2.15672e-19	7.24702e-07	0.240725	L	Lost
chr1	37703450	37704044	55.3895	57.0234	23.3071	20.2618	17.4565	9.59217	37703753	37703715	37703726	+	17.9123	1.76088	0.0403482	1.80123	2.69384e-09	0.910666	3.44271e-09	2.97346e-09	0.922079	1.16579e-08	L	Lost
chr1	37728186	37728435	45.4285	8.48835	31.2538	5.40214	15.0105	0	37728348	37728376	37728387	-	4.01754	2.26111	-2.36156	-0.100447	1.09612e-10	8.57479e-06	0.83668	1.29548e-10	2.39914e-05	0.871346	L	Lost
chr1	37765158	37765385	30.449	11.0976	22.1166	7.81753	13.9187	0	37765279	37765300	37765311	+	10.8246	1.99577	-1.489	0.506774	8.95232e-08	0.00418516	0.279963	9.39881e-08	0.00669124	0.349175	L	Lost
chr1	38005657	38006062	49.9995	22.1008	23.7594	11.873	14.0284	4.58128	38005927	38005931	38005942	+	16.9298	2.09837	-1.219	0.879367	2.75692e-10	0.00527545	0.0225009	3.18796e-10	0.00828222	0.0353254	L	Lost
chr1	38013465	38013828	51.2422	2.31593	27.4781	1.15796	23.558	0	38013617	38013765	38013776	-	2.14035	2.80994	-4.50554	-1.69561	3.8124e-19	1.1877e-08	0.0288823	9.07261e-19	7.52181e-08	0.044524	L	Lost
chr1	38016441	38016888	61.2127	9.06479	23.3214	4.33856	19.8764	0	38016677	38016523	38016534	+	8.05263	2.72558	-2.64136	0.0842161	1.57314e-17	6.55907e-08	0.853685	3.21208e-17	3.34489e-07	0.885252	L	Lost
chr1	38087881	38088300	50.3995	39.3708	26.6638	19.6854	20.3649	10.0701	38088071	38088036	38088047	-	15.1404	3.38238	-0.37281	3.00957	1.16374e-23	0.317261	3.21768e-17	4.19605e-23	0.360006	2.52686e-16	BS	Book
chr1	38115357	38116048	67.4502	17.3695	27.0686	5.30776	15.0104	0	38115519	38115553	38115564	+	5.33333	2.01734	-1.98306	0.0342781	6.68903e-13	1.14185e-06	0.925765	9.12442e-13	4.05472e-06	0.943221	L	Lost
chr1	38190939	38191152	26.6638	4.43802	20.8406	3.28005	13.9339	0	38191039	38191003	38191014	-	1.85965	3.12335	-2.56952	0.553827	3.74761e-15	4.60652e-05	0.373472	6.16392e-15	0.000107122	0.449128	L	Lost
chr1	38213158	38213562	60.3984	9.64632	29.5826	3.95596	20.8357	0	38213420	38213260	38213271	-	6.85965	2.52932	-2.59647	-0.0671489	6.90889e-16	7.94355e-08	0.881267	1.21327e-15	3.95059e-07	0.907613	L	Lost
chr1	38441055	38441523	57.8845	10.2278	27.4876	4.05542	22.0251	0	38441307	38441317	38441328	+	5.12281	2.24208	-2.51112	-0.269041	1.19603e-14	5.8546e-08	0.532358	1.88391e-14	3.02611e-07	0.605318	L	Lost
chr1	38475471	38476267	88.286	114.728	30.4158	33.0938	27.6141	24.0538	38475870	38475930	38475941	+	17.5439	2.45599	0.373869	2.82986	1.31543e-18	0.252352	5.39431e-24	2.97795e-18	0.292405	8.93338e-23	BS	Book
chr1	38504118	38504676	51.2612	67.644	24.6021	24.029	18.0475	14.4106	38504416	38504420	38504431	-	9.4386	2.26185	0.388704	2.65055	3.50546e-14	0.259564	9.88147e-19	5.30865e-14	0.300125	8.99575e-18	BS	Book
chr1	38557604	38558377	71.9879	45.2499	24.5594	12.9264	17.9723	6.05635	38558156	38558149	38558160	+	16.3333	2.20684	-0.666319	1.54052	3.01929e-14	0.0654046	9.31637e-07	4.59577e-14	0.0847413	2.48337e-06	L	Lost
chr1	38638778	38639326	45.8048	60.1198	14.9699	21.4198	12.3848	10.5784	38638947	38638954	38638965	-	9.77193	1.76136	0.37941	2.14077	1.78202e-07	0.347574	2.72971e-10	1.85671e-07	0.39112	1.03286e-09	BS	Book
chr1	38826928	38827377	133.182	10.2278	62.8317	4.34364	56.3891	0	38827156	38826951	38826962	-	3.80702	3.21732	-3.71278	-0.495459	1.83702e-28	3.43573e-15	0.261014	1.02273e-27	1.41315e-13	0.328559	L	Lost
chr1	38853544	38854133	114.15	10.2278	34.1631	2.79799	26.8894	0	38853706	38854034	38854045	-	0.0350877	3.3905	-3.48896	-0.098462	1.21362e-22	1.84614e-11	0.836896	3.99166e-22	2.68058e-10	0.871495	L	Lost
chr1	38880389	38881429	207.322	34.2467	61.6222	5.78982	51.9901	0	38880935	38880882	38880893	+	2.29825	2.81447	-2.57894	0.235532	7.60013e-22	5.07327e-11	0.489295	2.32611e-21	6.49137e-10	0.564237	L	Lost
chr1	38891910	38892579	99.923	62.9076	46.238	21.226	50.2777	9.94495	38892246	38892228	38892239	-	12.9298	2.93226	-0.666992	2.26527	2.16089e-21	0.0731676	3.19631e-12	6.34523e-21	0.0939208	1.47485e-11	L	Lost
chr1	38926268	38926618	96.9948	7.91191	51.1948	5.30776	46.6192	0	38926435	38926472	38926483	+	0.0350877	3.16486	-3.6203	-0.455441	2.05102e-22	8.0381e-12	0.358845	6.61319e-22	1.28963e-10	0.434029	L	Lost
chr1	38930702	38931342	94.9425	20.7388	36.2153	7.33039	27.769	0	38930998	38931015	38931026	+	13.7895	2.49765	-2.14873	0.348921	5.32204e-19	4.36794e-08	0.323557	1.24822e-18	2.34299e-07	0.396406	L	Lost
chr1	38960676	38961321	144.956	25.7584	70.7974	7.81245	79.2822	0	38961012	38960949	38960960	-	15.7895	3.40049	-2.47324	0.927258	1.56914e-33	6.32139e-11	0.0071732	1.35073e-32	7.89778e-10	0.0121382	L	Lost
chr1	39043863	39044529	106.293	104.982	37.4913	39.9472	27.3162	24.3584	39044251	39044056	39044067	+	8.22807	2.39553	-0.0215086	2.37403	6.87655e-17	0.950287	4.91142e-16	1.32333e-16	0.956614	3.36257e-15	BS	Book
chr1	39132817	39133340	55.3515	60.9895	24.5546	28.7604	19.1947	14.2101	39133037	39132960	39132971	+	16.1579	2.15244	0.123061	2.27551	4.85396e-12	0.739745	8.49664e-13	6.23144e-12	0.76879	4.14427e-12	BS	Book
chr1	39179597	39180050	71.2686	11.6791	34.1868	4.73132	17.1299	0	39179710	39179944	39179955	+	0.122807	2.21876	-2.68649	-0.467726	3.77937e-11	9.93198e-08	0.304397	4.59085e-11	4.79132e-07	0.375918	L	Lost
chr1	39232339	39233261	103.77	65.5169	26.2354	16.1171	16.4956	8.07076	39232708	39232732	39232743	+	12.9123	2.33142	-0.668388	1.66303	7.51526e-17	0.0533728	2.11793e-08	1.44076e-16	0.0703067	6.65318e-08	L	Lost
chr1	39251122	39251742	57.437	49.8869	22.8787	18.3336	25.868	9.3671	39251422	39251466	39251477	-	12.4386	2.07359	-0.211714	1.86188	8.99536e-11	0.586847	2.39266e-08	1.06824e-10	0.625751	7.47676e-08	L	Lost
chr1	39291830	39292737	232.747	53.7484	103.67	16.4003	114.38	5.13111	39292385	39292346	39292357	-	17.3158	3.1562	-2.12701	1.02919	3.50854e-32	6.89806e-10	0.000607099	2.68627e-31	6.33654e-09	0.00118354	L	Lost
chr1	39341586	39341856	30.3684	5.5016	20.7979	3.66774	16.2922	0	39341702	39341721	39341732	+	13.8596	1.86697	-2.55907	-0.692098	2.39977e-07	3.26332e-05	0.228747	2.49125e-07	7.86129e-05	0.292048	L	Lost
chr1	39348674	39349693	213.221	46.895	97.066	15.0535	86.7744	4.48505	39349063	39349072	39349083	-	6.5614	3.11349	-2.19351	0.919979	1.12503e-32	1.32264e-10	0.00215524	9.00577e-32	1.49903e-09	0.00392221	L	Lost
chr1	39404394	39405087	91.1384	53.8428	38.2913	16.793	42.6052	7.19602	39404689	39404662	39404673	+	14.3158	2.41774	-0.768529	1.64921	8.31813e-19	0.0232271	2.39148e-08	1.91661e-18	0.0325742	7.47377e-08	L	Lost
chr1	39427460	39428101	70.7737	32.3286	27.4923	9.93962	16.9295	4.38365	39427734	39427691	39427702	+	18.4737	2.3926	-1.15381	1.23879	3.73676e-13	0.00593266	0.000704246	5.19819e-13	0.00924387	0.00136236	L	Lost
chr1	39486815	39487750	99.0708	29.0435	22.8882	6.27189	17.1423	0	39487067	39486833	39486844	+	1.12281	1.84291	-1.77748	0.0654243	1.27509e-09	1.40816e-05	0.852972	1.42887e-09	3.72433e-05	0.884702	L	Lost
chr1	39507619	39508817	265.916	90.3162	59.5272	23.3531	51.3752	11.1987	39508374	39508418	39508429	+	16.3333	2.85457	-1.56324	1.29133	9.62329e-29	1.37099e-06	2.76844e-06	5.49373e-28	4.75489e-06	7.04631e-06	BA	Book
chr1	39515958	39516465	115.331	29.143	56.6085	11.2914	55.7125	4.92053	39516241	39516254	39516265	-	15.1754	3.61904	-2.00842	1.61062	3.77261e-34	1.04491e-07	4.07182e-06	3.42197e-33	5.00804e-07	1.01925e-05	L	Lost
chr1	39554477	39554944	55.4179	30.783	25.0068	10.7099	18.3913	4.16313	39554784	39554681	39554692	+	17.5439	2.08107	-0.860289	1.22078	4.51559e-07	0.0976282	0.00553271	4.66077e-07	0.122602	0.0095191	L	Lost
chr1	39585042	39586078	285.909	29.6199	131.482	6.56011	150.09	0	39585404	39585473	39585484	+	3.2807	3.98014	-3.26649	0.713651	4.36553e-46	4.47089e-18	0.0353442	1.08763e-44	4.17936e-16	0.0536735	L	Lost
chr1	39663442	39664041	57.0512	14.9541	22.4739	5.01446	20.5358	0	39663718	39663732	39663743	-	7.15789	2.38401	-1.91735	0.466657	6.48257e-15	9.60041e-06	0.238499	1.04475e-14	2.64876e-05	0.303222	L	Lost
chr1	39665090	39666004	144.876	101.697	39.5198	24.029	38.1219	10.383	39665481	39665518	39665529	+	12.5614	2.67177	-0.51201	2.15976	8.9962e-26	0.0970996	4.33497e-16	3.94505e-25	0.121978	2.98496e-15	BS	Book
chr1	39669605	39670574	167.297	116.949	58.2702	38.3123	70.789	24.3399	39670100	39670099	39670110	-	16.5614	3.33209	-0.522058	2.81003	1.85089e-36	0.0941678	1.00076e-24	2.03256e-35	0.118546	1.80921e-23	BS	Book
chr1	39671281	39671981	132.005	38.3965	36.6343	13.2197	21.1702	2.81987	39671608	39671906	39671917	+	8.35088	2.53137	-1.77203	0.759343	3.58462e-12	0.000150004	0.0552697	4.64725e-12	0.000313447	0.080867	L	Lost
chr1	39678999	39679876	159.05	23.2537	44.124	6.46573	38.8611	0	39679430	39679182	39679193	-	4.08772	2.44808	-2.7806	-0.33252	2.51241e-23	1.63354e-14	0.307754	8.79867e-23	5.59909e-13	0.379539	L	Lost
chr1	39775465	39775694	37.4865	1.64003	26.2543	1.15796	15.1684	0	39775578	39775606	39775617	-	3.73684	2.59433	-4.47633	-1.88201	3.65326e-12	1.25537e-06	0.0369097	4.73243e-12	4.40247e-06	0.0558534	L	Lost
chr1	39916028	39917030	390.669	213.16	187.866	74.9795	156.249	73.219	39916308	39916327	39916338	+	9.7193	4.04167	-0.877528	3.16414	1.53814e-45	0.0103628	1.75167e-27	3.65758e-44	0.015471	4.38668e-26	BA	Book
chr1	39959545	39959905	68.6834	15.63	39.9721	6.27189	24.6365	0	39959782	0	0	0	0	2.30588	-2.12959	0.176281	8.77716e-12	6.52462e-06	0.675332	1.10748e-11	1.88217e-05	0.735054	L	Lost
chr1	39980656	39980985	50.3852	6.46573	32.0681	3.66774	19.6692	0	39980796	39980788	39980799	-	5.2807	2.80009	-3.01286	-0.212768	1.90876e-18	3.29523e-08	0.684154	4.25419e-18	1.83608e-07	0.742732	L	Lost
chr1	40001657	40002087	86.686	12.2556	37.5482	5.30776	31.6691	0	40001965	40001945	40001956	+	1.38596	2.71178	-2.85732	-0.145536	6.99729e-20	3.43481e-10	0.729478	1.77697e-19	3.45753e-09	0.781406	L	Lost
chr1	40108926	40109443	116.126	16.4997	57.0227	7.81753	51.2155	0	40109191	40109148	40109159	-	4.64912	3.0117	-2.82473	0.186978	9.16234e-25	2.7982e-11	0.630098	3.66159e-24	3.85981e-10	0.695275	L	Lost
chr1	40113859	40114851	203.603	171.568	56.6085	54.6233	56.5183	35.9318	40114371	40114361	40114372	+	16.5614	2.67315	-0.251707	2.42144	1.30761e-25	0.416241	1.66808e-20	5.65095e-25	0.460766	1.8601e-19	BS	Book
chr1	40323991	40324562	77.0633	33.9585	31.2301	12.7325	23.253	8.77522	40324265	40324240	40324251	+	14.5789	2.29405	-1.16513	1.12892	1.3017e-15	0.00161821	0.000516856	2.23027e-15	0.00278297	0.00101631	L	Lost
chr1	40347799	40348469	67.4312	79.0349	25.3974	24.4167	18.7458	14.9485	40348148	40348115	40348126	+	9.36842	2.11368	0.214737	2.32842	4.24774e-13	0.535985	3.49051e-15	5.88537e-13	0.57753	2.17687e-14	BS	Book
chr1	40361237	40361459	69.1499	2.60415	65.8216	2.60415	59.8627	0	40361351	40361315	40361326	+	1.57895	5.61453	-4.63145	0.98308	8.67366e-35	3.48914e-10	0.210704	8.33305e-34	3.50702e-09	0.271485	L	Lost
chr1	40415170	40415526	34.5536	6.27189	20.4169	2.79799	13.9321	0	40415362	40415393	40415404	+	-0.403509	2.02139	-2.47735	-0.455955	9.56227e-10	8.82122e-06	0.383659	1.07681e-09	2.45998e-05	0.45957	L	Lost
chr1	40667751	40668361	72.0686	37.6364	27.0923	13.4186	18.6208	8.89671	40668043	40667942	40667953	+	12.5088	2.39641	-0.963516	1.4329	1.78271e-16	0.00865561	9.64306e-06	3.29967e-16	0.0130934	2.31577e-05	L	Lost
chr1	40722232	40723052	112.384	43.1329	43.2908	13.99	45.2847	5.10333	40722733	40722711	40722722	+	17.3158	2.67091	-1.39347	1.27745	2.27721e-21	0.000103439	5.05592e-05	6.67523e-21	0.000223496	0.000112279	L	Lost
chr1	40736721	40737894	95.3663	41.9851	20.0169	10.5211	15.1635	5.83016	40737080	40736873	40736884	+	8.85965	2.0543	-1.21386	0.840438	2.0834e-09	0.00562255	0.023453	2.31048e-09	0.00879054	0.0367098	L	Lost
chr1	40944566	40945388	88.2908	33.8692	21.2359	8.10575	11.8101	0	40944731	40945108	40945119	-	14.4561	1.9282	-1.39626	0.531944	1.13726e-13	6.04916e-05	0.0812241	1.64678e-13	0.000136799	0.115138	L	Lost
chr1	40959850	40960355	52.7996	41.7811	24.9641	16.6936	29.556	5.46942	40960096	40960131	40960142	+	17.8772	2.69538	-0.344089	2.35129	8.16805e-12	0.466335	9.49774e-09	1.03282e-11	0.509914	3.08822e-08	L	Lost
chr1	40964343	40965322	96.171	78.7314	32.4681	20.1675	30.8422	11.8691	40964894	40964898	40964909	+	16.9298	2.86157	-0.288585	2.57298	8.36211e-20	0.440497	1.95503e-15	2.10811e-19	0.484518	1.2543e-14	BS	Book
chr1	41025054	41025615	99.1087	27.4979	45.8	8.87604	45.4709	5.19831	41025332	41025321	41025332	+	15.3333	3.11111	-1.84819	1.26292	4.21285e-20	2.181e-05	0.001083	1.09452e-19	5.48856e-05	0.00204744	L	Lost
chr1	41056161	41056881	60.4316	86.4546	20.0026	25.7634	12.7073	13.4519	41056416	41056379	41056390	+	15.5614	1.76624	0.512427	2.27867	2.82347e-11	0.101774	6.93879e-18	3.45643e-11	0.127315	5.79365e-17	BS	Book
chr1	41187826	41188765	242.713	46.895	125.749	15.153	123.698	5.7064	41188460	41188494	41188505	+	13.386	3.55069	-2.37893	1.17176	5.56967e-33	4.08692e-10	0.000414055	4.58282e-32	4.02736e-09	0.000823764	L	Lost
chr1	41196486	41198084	460.494	36.4734	228.094	5.78982	249.554	0	41197572	41197558	41197569	-	4.73684	3.97622	-3.66519	0.311031	5.08643e-46	2.03597e-22	0.345962	1.25984e-44	6.57966e-20	0.420396	L	Lost
chr1	41321118	41321666	55.3895	74.0945	19.1836	22.9604	14.6028	19.3943	41321423	41321451	41321462	-	10.2632	2.20599	0.426847	2.63284	3.25666e-14	0.205416	1.6478e-19	4.9471e-14	0.242288	1.6378e-18	BS	Book
chr1	41447089	41447752	196.717	35.8867	90.0522	11.0976	80.1006	4.41222	41447316	41447291	41447302	-	5.7193	3.62243	-2.43828	1.18415	1.15665e-28	5.90412e-09	0.00126161	6.55453e-28	4.1193e-08	0.00236769	L	Lost
chr1	41789001	41789570	31.6965	70.3375	13.3509	29.0435	10.4421	9.95291	41789165	41789232	41789243	-	17.9123	1.41649	1.1505	2.567	3.96714e-05	0.00406961	6.48685e-15	4.00443e-05	0.00652311	3.93139e-14	L	Lost
chr1	41802645	41803323	58.2702	86.3551	25.8021	27.6917	29.8852	24.8036	41802994	41802944	41802955	+	16.3333	3.20422	0.566472	3.77069	8.64876e-20	0.145331	5.47126e-27	2.17779e-19	0.176592	1.28928e-25	BS	Book
chr1	41889332	41890128	26.2543	62.4306	9.9942	20.7439	6.11713	12.7529	41889849	41889854	41889865	+	14.1579	1.44181	1.24275	2.68456	2.41294e-05	0.00138285	5.60382e-17	2.43947e-05	0.00240909	4.27525e-16	BM	Book
chr1	41940417	41941039	62.9171	84.2381	29.1731	30.3009	30.5688	22.976	41940608	41940590	41940601	-	17.9123	3.69924	0.415541	4.11479	1.53747e-26	0.25688	2.56783e-32	7.21192e-26	0.297275	1.14499e-30	BS	Book
chr1	42115080	42116865	402.677	42.8396	142.319	6.46573	138.3	0	42115565	42115389	42115400	-	6.05263	3.50881	-3.23324	0.275571	4.65251e-26	9.71176e-14	0.455286	2.0927e-25	2.69427e-12	0.530828	L	Lost
chr1	42135171	42135438	30.3968	19.3972	23.3214	11.5796	19.8793	4.1495	42135327	42135295	42135306	+	12.9123	2.83931	-0.675145	2.16416	2.06682e-11	0.182539	2.82081e-06	2.54956e-11	0.21755	7.17047e-06	L	Lost
chr1	42165006	42165907	145.347	113.083	48.2571	32.5174	49.24	15.5555	42165519	42165485	42165496	-	15.1754	3.35732	-0.363231	2.99409	6.15836e-28	0.315692	1.45578e-21	3.28417e-27	0.358414	1.83435e-20	BS	Book
chr1	42224740	42225177	43.3525	4.72624	27.9493	3.08621	24.155	0	42224854	42225111	42225122	+	8.21053	2.64059	-3.12183	-0.48124	1.45052e-11	1.44048e-06	0.428749	1.80646e-11	4.96695e-06	0.504534	L	Lost
chr1	42300279	42300663	107.846	15.9182	70.3736	9.3581	75.8126	0	42300420	42300419	42300430	-	12.3158	3.83428	-2.74104	1.09323	6.7218e-29	2.82184e-09	0.0107468	3.88968e-28	2.16245e-08	0.0177438	L	Lost
chr1	42635278	42635871	51.5995	46.9945	24.9736	17.0813	26.1884	11.8036	42635731	42635713	42635724	+	16.7193	2.67425	-0.148609	2.52564	3.92159e-15	0.709558	8.53143e-13	6.44008e-15	0.740936	4.16004e-12	BS	Book
chr1	42680391	42681743	102.385	183.152	37.0676	48.5351	39.8292	37.138	42681092	42681104	42681115	+	17.9123	2.08476	0.83304	2.9178	4.0387e-15	0.00783213	7.81713e-29	6.62502e-15	0.0119452	2.25368e-27	BM	Book
chr1	42689901	42690714	43.3145	91.8618	13.7319	20.6495	11.5794	10.8663	42690211	42690290	42690301	+	17.9123	2.17808	1.07762	3.2557	1.1777e-12	0.00162464	2.46217e-28	1.57706e-12	0.00279303	6.79259e-27	BM	Book
chr1	42760166	42760869	98.7182	45.3494	45	21.226	44.6723	9.98165	42760533	42760500	42760511	+	13.5614	2.67152	-1.12672	1.5448	1.3743e-24	0.00059537	1.30884e-07	5.41376e-24	0.00110597	3.80216e-07	L	Lost
chr1	42762150	42762615	54.942	29.9082	22.8882	9.26372	19.1947	0	42762299	42762373	42762384	-	14.0877	1.87292	-0.868204	1.00471	6.17978e-09	0.035849	0.00492061	6.71938e-09	0.0486956	0.00852937	L	Lost
chr1	42908151	42908575	36.5584	49.7874	14.5699	25.0875	15.8891	17.3899	42908407	42908353	42908364	+	1.80702	2.28496	0.444893	2.72985	0.00212448	0.624169	0.000243575	0.0021295	0.66084	0.000498566	BS	Book
chr1	43139589	43140345	65.3267	58.9517	27.4496	19.0095	33.697	10.1377	43139776	43139864	43139875	-	16.3333	2.99824	-0.14762	2.85062	1.90675e-18	0.710278	5.85753e-16	4.25026e-18	0.741563	3.98164e-15	BS	Book
chr1	43224856	43225106	31.2775	4.24418	20.0311	3.28005	11.7619	0	43225023	43224922	43224933	+	-0.350877	2.01294	-2.80999	-0.797048	9.6247e-09	9.21087e-06	0.183648	1.03862e-08	2.55646e-05	0.240218	L	Lost
chr1	43228627	43229151	69.1167	32.9995	29.9921	16.2115	21.2736	4.67889	43228827	43228812	43228823	+	17.8772	2.19042	-1.07443	1.11599	1.78113e-15	0.00255649	0.000402575	3.01201e-15	0.00424513	0.000801959	L	Lost
chr1	43243146	43243634	84.553	10.1335	38.753	3.86158	33.6099	0	43243424	0	0	0	0	2.66407	-3.11435	-0.450288	1.03174e-15	1.26689e-09	0.338326	1.78413e-15	1.07018e-08	0.412105	L	Lost
chr1	43318024	43318595	56.6654	30.3953	24.1878	13.1253	21.9628	6.08846	43318481	43318466	43318477	+	12.9123	2.52617	-0.911702	1.61447	3.37048e-17	0.0148864	1.72054e-06	6.677e-17	0.0216251	4.46492e-06	L	Lost
chr1	43319559	43320393	48.7188	91.191	15.8269	25.5696	10.3424	14.4995	43320004	43319961	43319972	+	14.3158	2.00078	0.895126	2.89591	3.47089e-10	0.0152134	1.46422e-20	3.9903e-10	0.0220605	1.64413e-19	BM	Book
chr1	43453163	43453859	87.0718	14.2782	25.4401	4.43802	19.8275	0	43453609	43453331	43453342	+	9.7193	2.55635	-2.58483	-0.0284782	3.419e-20	6.50659e-10	0.941119	8.97269e-20	6.02587e-09	0.955081	L	Lost
chr1	43503535	43503853	42.5003	16.112	22.9024	7.91191	11.5539	0	43503670	0	0	0	0	1.99063	-1.38797	0.602666	2.96766e-10	0.00138947	0.122598	3.42511e-10	0.00241926	0.167402	L	Lost
chr1	43538271	43538907	77.0206	24.8937	28.3303	6.94779	20.2986	0	43538468	43538331	43538342	-	8.91228	2.36052	-1.63397	0.726546	3.77142e-18	9.37983e-06	0.0287683	8.15026e-18	2.59804e-05	0.0443563	L	Lost
chr1	43540904	43541383	72.0401	13.3141	30.8158	5.11392	24.1934	0	43541028	43540924	43540935	-	13.7193	2.82711	-2.42205	0.405059	9.6171e-22	2.15901e-08	0.315702	2.91581e-21	1.2733e-07	0.388001	L	Lost
chr1	43583278	43584021	60.8222	75.4616	19.5741	21.0372	14.5815	15.6971	43583654	43583615	43583626	-	16.3333	2.14046	0.299102	2.43957	1.52282e-13	0.380727	7.94309e-17	2.18052e-13	0.425072	5.94864e-16	BS	Book
chr1	43627926	43628270	70.0163	10.7099	41.2907	6.07804	30.5282	0	43628127	43628076	43628087	-	0.473684	2.4779	-2.71027	-0.232365	5.17453e-16	1.04675e-08	0.595424	9.1998e-16	6.75404e-08	0.664469	L	Lost
chr1	43877465	43877929	52.4897	8.9755	24.5926	3.18567	17.0616	0	43877682	43877458	43877469	+	6.08772	2.06844	-2.61451	-0.546069	5.70715e-12	1.22497e-07	0.234859	7.2909e-12	5.75319e-07	0.299098	L	Lost
chr1	43914366	43915155	105.694	25.8578	35.8011	12.0617	37.9186	4.0795	43914852	43914662	43914673	+	13.614	4.07902	-2.03075	2.04828	4.50041e-30	3.78552e-06	4.98495e-07	2.87648e-29	1.16153e-05	1.36393e-06	L	Lost
chr1	43994166	43994680	81.2011	16.112	49.171	8.87604	52.3318	0	43994429	43994315	43994326	-	13.7193	4.05586	-2.32291	1.73295	2.15814e-31	1.56575e-07	5.21707e-05	1.5512e-30	7.11824e-07	0.000115585	L	Lost
chr1	44292216	44292428	31.6349	9.84016	27.8971	9.3581	26.1884	0	44292330	44292365	44292376	-	13.9474	4.43349	-1.6571	2.77639	8.34627e-21	0.0012831	7.5573e-07	2.32047e-20	0.00224824	2.02962e-06	L	Lost
chr1	44388687	44389039	64.9884	3.28005	39.2052	2.31593	39.1822	0	44388780	44388909	44388920	+	12.4561	4.50772	-4.27171	0.236012	4.78057e-33	3.67016e-10	0.732754	3.94886e-32	3.66616e-09	0.784222	L	Lost
chr1	44625121	44625570	49.5852	16.2115	22.0834	8.10575	11.6049	0	44625334	44625322	44625333	-	16.9298	2.45383	-1.632	0.821831	1.99472e-10	0.00140947	0.0699295	2.32497e-10	0.00245143	0.100403	L	Lost
chr1	44670044	44670923	270.299	37.1391	139.337	9.25864	150.783	7.05888	44670373	44670392	44670403	-	5.01754	4.45738	-2.84351	1.61387	4.7054e-40	2.09145e-11	1.81377e-05	7.01531e-39	2.98562e-10	4.23118e-05	L	Lost
chr1	44946623	44947053	53.3277	19.6854	28.3351	9.26372	20.9466	3.39017	44946871	44946739	44946750	-	3.40351	3.38829	-1.46152	1.92676	1.33974e-24	0.000339476	9.48038e-07	5.2819e-24	0.000661999	2.5253e-06	L	Lost
chr1	45414936	45415380	110.803	15.4361	75.4253	8.97042	61.3242	4.64491	45415114	45415129	45415140	+	13.8421	5.4942	-2.82542	2.66878	1.13731e-47	3.45796e-11	6.47462e-09	3.17893e-46	4.64893e-10	2.13657e-08	L	Lost
chr1	45464492	45464869	74.1446	8.87604	39.9815	5.11392	45.7821	0	45464672	45464548	45464559	-	0	4.07888	-3.04686	1.03202	1.55538e-34	2.65716e-10	0.0316079	1.46323e-33	2.74643e-09	0.0483785	L	Lost
chr1	45647639	45647957	54.9515	30.9768	33.7108	20.1675	37.4264	10.0637	45647759	45647736	45647747	+	14.5439	3.57002	-0.849219	2.7208	3.6524e-23	0.0391816	3.48566e-12	1.2608e-22	0.0528837	1.60096e-11	BS	Book
chr1	45875393	45875751	42.0907	7.91191	25.0258	4.43802	14.5032	0	45875545	45875472	45875483	+	5.68421	2.19879	-2.4159	-0.217109	8.01666e-12	2.83474e-06	0.652402	1.01432e-11	8.9974e-06	0.714565	L	Lost
chr1	45884243	45884777	53.3277	15.5356	24.5926	4.92008	16.3025	0	45884611	45884580	45884591	-	14.1579	2.40867	-1.79961	0.609051	2.96714e-15	2.61578e-05	0.120837	4.92005e-15	6.45209e-05	0.165245	L	Lost
chr1	45971417	45971793	60.3605	15.153	34.9726	10.1335	44.315	0	45971550	45971465	45971476	-	7.45614	4.09129	-2.05414	2.03715	1.43163e-26	1.28272e-05	1.0788e-05	6.74245e-26	3.42593e-05	2.57777e-05	L	Lost
chr1	45982760	45983289	83.2486	33.4764	29.1588	11.9622	14.2799	3.90365	45983084	45983000	45983011	-	2.01754	2.28033	-1.29882	0.981505	2.50181e-15	0.000520734	0.0027951	4.17887e-15	0.000977759	0.00501249	L	Lost
chr1	45986705	45987466	77.8539	64.5578	24.1356	21.7131	28.4445	16.6958	45987209	45987167	45987178	-	10.0351	2.67703	-0.284029	2.393	8.20846e-20	0.415514	5.74867e-15	2.0703e-19	0.460096	3.50341e-14	BS	Book
chr1	46209788	46210031	36.2343	5.01446	27.8924	4.5324	32.063	0	46209879	46209893	46209904	+	4.33333	3.54179	-2.7848	0.756993	1.38261e-06	0.00420128	0.379182	1.41604e-06	0.00671417	0.455011	L	Lost
chr1	46600508	46600747	30.0016	11.8679	20.8311	6.27189	20.2853	0	46600667	46600650	46600661	-	5.4386	3.51903	-1.34193	2.1771	2.75805e-18	0.00521394	6.72823e-06	6.03839e-18	0.00819247	1.64535e-05	L	Lost
chr1	46920343	46920772	62.8222	7.42985	34.1251	2.79799	45.6843	0	46920562	0	0	0	0	3.02596	-3.09672	-0.0707616	2.18418e-19	8.78277e-09	0.889587	5.30307e-19	5.80494e-08	0.914295	L	Lost
chr1	46978290	46979314	266.091	57.6942	90.4095	15.5305	114.499	14.222	46978673	46978532	46978543	-	7.15789	4.14846	-2.19988	1.94858	1.26235e-43	2.87595e-09	2.61383e-09	2.53163e-42	2.19549e-08	8.96907e-09	BA	Book
chr1	47071243	47071598	44.1051	3.28005	29.9541	2.79799	32.063	0	47071486	47071565	47071576	-	4.38596	3.31938	-3.71346	-0.394076	1.57695e-19	9.21442e-08	0.563261	3.8703e-19	4.50213e-07	0.634309	L	Lost
chr1	47115241	47115633	56.9848	12.7376	33.6919	7.81753	37.9158	0	47115430	47115358	47115369	+	9.14035	3.22582	-2.18573	1.04009	1.46686e-18	1.07229e-05	0.024556	3.30444e-18	2.92093e-05	0.0382949	L	Lost
chr1	47133193	47134104	83.7103	13.7961	29.9968	4.43802	23.7839	0	47133427	47133820	47133831	-	9.78947	3.24135	-2.58288	0.658473	1.56996e-26	2.83495e-09	0.106883	7.35823e-26	2.17103e-08	0.147824	L	Lost
chr1	47384667	47385248	38.772	60.9743	15.4459	22.866	16.2533	18.8148	47385019	47385019	47385030	-	13.8947	2.32107	0.658489	2.97955	1.77073e-10	0.114294	1.25154e-16	2.06886e-10	0.141612	9.17447e-16	BS	Book
chr1	47890812	47891417	99.104	13.0208	42.0528	5.2083	49.851	0	47891131	47890978	47890989	-	8.87719	3.47653	-2.85566	0.620861	7.44867e-30	8.80499e-11	0.133828	4.6772e-29	1.0513e-09	0.18114	L	Lost
chr1	47970788	47971488	93.6618	31.3594	38.734	9.93962	28.4341	0	47971087	47971017	47971028	-	14.3158	2.73777	-1.58612	1.15165	5.28188e-18	0.00010102	0.00135458	1.12462e-17	0.000218672	0.00253292	L	Lost
chr1	48503206	48503740	37.515	57.6993	16.2696	23.6363	16.2533	19.9802	48503457	48503498	48503509	+	9.84211	2.64789	0.618952	3.26684	1.7773e-15	0.0883515	3.29945e-23	3.00584e-15	0.111704	4.9871e-22	BS	Book
chr1	49245648	49246325	31.2586	72.355	11.2559	20.5501	7.19514	19.9802	49246050	49245986	49245997	+	18.4737	3.52488	1.21766	4.74255	1.87752e-15	0.00673106	3.24091e-28	3.16854e-15	0.0103854	8.84035e-27	BM	Book
chr1	49417823	49418871	48.3425	77.7622	13.3509	22.6772	10.9945	13.8126	49418511	49418515	49418526	+	18.1053	1.95345	0.690056	2.64351	1.56343e-09	0.0682906	1.3048e-16	1.74456e-09	0.0881137	9.5463e-16	BS	Book
chr1	50400784	50402005	68.7451	116.656	17.0839	20.8434	13.7204	14.3166	50401623	50401709	50401720	+	17.5439	2.39739	0.759822	3.15721	6.37314e-17	0.0206778	6.01254e-29	1.23092e-16	0.0292639	1.76034e-27	BM	Book
chr1	50710327	50710745	78.3867	12.6382	50.4422	6.75395	53.0825	0	50710456	50710438	50710449	-	9.73684	4.14812	-2.61001	1.5381	5.92099e-34	6.78517e-09	0.000541625	5.30264e-33	4.65134e-08	0.00106243	L	Lost
chr1	50761415	50762268	128.71	29.0435	42.486	7.23601	51.2561	0	50761668	50761974	50761985	+	8.87719	3.85306	-2.15497	1.6981	6.52897e-33	1.13056e-07	5.02404e-06	5.32951e-32	5.37014e-07	1.24447e-05	L	Lost
chr1	51244153	51244737	119.159	12.0617	75.0016	5.30776	94.238	0	51244479	51244164	51244175	-	0.438596	3.35913	-3.3238	0.0353322	7.24966e-29	4.09567e-13	0.934155	4.18158e-28	9.43564e-12	0.94983	L	Lost
chr1	51330389	51331022	64.9409	15.0535	21.2359	5.30776	14.4767	0	51330652	51330814	51330825	-	3.45614	2.38238	-2.13579	0.246596	3.9435e-16	5.29586e-07	0.52754	7.08239e-16	2.06961e-06	0.600786	L	Lost
chr1	51486522	51487026	87.0101	15.4412	52.0233	5.5016	68.3979	0	51486785	51486816	51486827	-	1.50877	3.21605	-2.53972	0.676327	1.51497e-23	1.59895e-08	0.10359	5.41301e-23	9.76905e-08	0.143744	L	Lost
chr1	51535352	51537171	493.525	252.311	102.432	34.5451	127.481	28.5681	51536589	51536010	51536021	-	16.9298	4.31733	-0.968267	3.34907	1.4228e-50	0.00518735	4.29045e-30	4.91149e-49	0.0081535	1.4588e-28	BA	Book
chr1	51537474	51539503	496.478	229.162	131.496	46.7012	133.926	40.5173	51538823	51538634	51538645	+	12.9123	4.2948	-1.1171	3.1777	3.36051e-65	0.000198891	1.12531e-34	3.73544e-63	0.000405562	6.72271e-33	BA	Book
chr1	51565360	51565623	38.7103	5.30776	29.9968	3.18567	27.5627	0	51565481	51565488	51565499	+	3.73684	2.90009	-2.92085	-0.0207647	1.99379e-15	1.53033e-06	0.971649	3.35875e-15	5.23369e-06	0.978686	L	Lost
chr1	51592818	51593381	97.4517	9.6514	46.2238	3.66774	52.3318	0	51593037	51593193	51593204	-	3.63158	3.68681	-3.40643	0.28038	1.28528e-30	5.34821e-12	0.552099	8.64486e-30	9.0424e-11	0.624167	L	Lost
chr1	51681531	51682233	84.9768	29.3266	22.9261	7.71807	13.1677	0	51681791	51682139	51682150	+	9.59649	2.00846	-1.50877	0.499687	4.46642e-14	2.7145e-05	0.114814	6.70022e-14	6.66698e-05	0.157758	L	Lost
chr1	51738738	51739166	49.1235	14.5664	24.5641	6.56011	18.0918	0	51738996	51738873	51738884	+	6.19298	2.97712	-1.7187	1.25841	3.73022e-17	0.000221598	0.0035924	7.36174e-17	0.000447802	0.00635033	L	Lost
chr1	51834307	51834707	38.6913	31.9359	27.0449	17.6577	21.406	8.67736	51834594	51834630	51834641	+	15.5614	3.05612	-0.274837	2.78128	7.66159e-17	0.507298	6.04003e-13	1.46782e-16	0.549789	2.99512e-12	L	Lost
chr1	51963363	51963673	55.3657	1.64003	40.8006	1.15796	38.1324	0	51963552	51963638	51963649	+	1.01754	3.13954	-5.03887	-1.89933	7.48281e-19	3.56705e-08	0.0344518	1.73356e-18	1.96463e-07	0.0524004	L	Lost
chr1	52030078	52030436	31.6491	46.5124	19.5694	22.6772	17.752	12.8408	52030247	52030214	52030225	-	13.5614	2.39797	0.543342	2.94131	1.36132e-09	0.229239	8.14415e-14	1.52369e-09	0.26779	4.39776e-13	BS	Book
chr1	52065714	52066196	63.3077	15.3418	28.7398	5.98367	21.517	0	52066032	52065976	52065987	-	0.438596	2.14104	-2.05343	0.0876102	2.47511e-12	3.05006e-06	0.825224	3.24565e-12	9.60536e-06	0.861432	L	Lost
chr1	52106543	52107146	140.757	30.1071	66.1979	11.192	69.0074	3.59878	52106879	52106884	52106895	-	6.50877	3.01662	-2.24434	0.772282	7.12784e-28	1.27244e-09	0.0198001	3.77566e-27	1.07434e-08	0.0313741	L	Lost
chr1	52184209	52184543	59.1652	8.20522	34.9868	5.88929	17.7172	0	52184358	52184402	52184413	-	0.421053	2.56935	-2.97276	-0.403413	8.86984e-16	1.58692e-08	0.414069	1.54365e-15	9.71126e-08	0.490047	L	Lost
chr1	52203664	52204224	82.8818	15.1479	38.7578	7.52423	28.3993	0	52203927	52204209	52204220	-	7.2807	2.48123	-2.44915	0.0320856	1.37251e-18	4.76234e-09	0.933306	3.10127e-18	3.40786e-08	0.94928	L	Lost
chr1	52206543	52207132	82.5672	10.034	37.1103	3.47389	25.4388	0	52206918	52206930	52206941	+	2.89474	2.20415	-3.03059	-0.826446	1.61362e-14	1.20343e-10	0.0571629	2.51239e-14	1.37773e-09	0.0834268	L	Lost
chr1	52290101	52290672	50.7378	43.5155	23.6977	14.472	32.183	7.82217	52290424	52290539	52290550	+	3.26316	2.23106	-0.223277	2.00778	2.27627e-08	0.645786	1.10033e-06	2.42689e-08	0.68124	2.91268e-06	L	Lost
chr1	52350180	52350689	69.5546	20.9377	29.9636	10.7099	39.2911	0	52350495	52350471	52350482	-	16.9298	2.86487	-1.73633	1.12854	1.00841e-19	2.95621e-05	0.00291781	2.52161e-19	7.19142e-05	0.0052215	L	Lost
chr1	52382637	52383328	67.4597	26.9316	28.3161	11.5847	28.6399	4.19124	52382925	52382905	52382916	+	18.1053	2.7171	-1.37744	1.33966	5.74381e-13	0.00399041	0.00137392	7.87876e-13	0.00640584	0.00256725	L	Lost
chr1	52411123	52411813	89.1383	43.8981	36.6675	15.4361	23.3305	5.79482	52411258	52411433	52411444	-	12.193	2.44225	-1.01585	1.42641	1.26149e-15	0.00811269	1.79265e-05	2.16379e-15	0.0123424	4.18391e-05	L	Lost
chr1	52418288	52418712	44.1478	34.8282	21.2549	14.6659	18.8514	5.08635	52418526	52418490	52418501	-	16.1579	2.51695	-0.330855	2.18609	1.90073e-15	0.378104	1.05513e-10	3.20659e-15	0.422436	4.16564e-10	L	Lost
chr1	52420590	52421494	70.8685	77.8668	20.0264	15.8238	16.6321	8.12979	52421154	52421000	52421011	+	16.9298	2.40702	0.132619	2.53963	1.12405e-15	0.708439	9.63243e-17	1.93725e-15	0.740017	7.14911e-16	L	Lost
chr1	52513342	52513942	88.7193	13.6023	40.3816	4.24418	38.1324	0	52513556	52513600	52513611	+	6.96491	2.61328	-2.67295	-0.0596744	2.26322e-20	3.89316e-10	0.879549	6.03519e-20	3.86616e-09	0.905981	L	Lost
chr1	52581479	52581985	62.446	12.1561	29.1304	4.63186	23.1683	0	52581722	52581704	52581715	+	4.31579	2.44299	-2.34485	0.0981324	2.07848e-13	1.22342e-06	0.823297	2.94534e-13	4.30245e-06	0.859731	L	Lost
chr1	52583997	52585148	143.195	44.2858	47.4665	16.112	40.2724	8.3655	52584293	52584292	52584303	-	16.3509	3.58755	-1.69147	1.89608	6.12458e-29	2.0729e-05	7.40669e-08	3.55439e-28	5.24998e-05	2.19926e-07	L	Lost
chr1	52713474	52713746	30.7921	8.10575	20.8074	4.1498	17.6808	0	52713642	52713609	52713620	+	8.49123	2.22764	-1.95658	0.271067	2.44102e-10	0.000222834	0.583434	2.83125e-10	0.000450111	0.653755	L	Lost
chr1	53008760	53009504	136.6	91.668	50.8469	31.2651	38.0487	21.3646	53009382	53009407	53009418	+	4.84211	2.95883	-0.580669	2.37816	4.89005e-24	0.0999274	5.11717e-15	1.82871e-23	0.125234	3.13601e-14	BS	Book
chr1	53009906	53011280	271.991	69.1744	134.581	13.1202	115.204	4.45651	53010531	53010767	53010778	+	7.89474	3.10597	-1.96745	1.13852	9.00856e-39	1.25329e-10	1.89438e-05	1.21305e-37	1.42999e-09	4.40589e-05	L	Lost
chr1	53267013	53267482	59.5367	8.10575	33.7441	3.47389	29.698	0	53267207	53267324	53267335	-	4.17544	2.5962	-2.90693	-0.310732	1.21816e-15	2.69071e-08	0.525341	2.09221e-15	1.5384e-07	0.598562	L	Lost
chr1	53638156	53638331	26.7018	1.64003	26.7018	1.64003	28.0437	0	53638218	0	0	0	0	5.32883	-3.98606	1.34278	2.07539e-18	1.71771e-05	0.18693	4.60379e-18	4.4372e-05	0.244068	L	Lost
chr1	53772030	53772579	49.1188	24.1234	21.2406	14.3776	14.6858	6.82975	53772181	53772430	53772441	-	15.1404	3.66228	-1.03942	2.62287	3.55933e-22	0.0166832	3.68638e-10	1.12206e-21	0.0240163	1.37613e-09	L	Lost
chr1	53880712	53880926	31.687	7.42985	21.2738	4.63186	10.396	0	53880789	0	0	0	0	2.16621	-2.10709	0.0591254	5.84151e-08	0.000370782	0.913014	6.16221e-08	0.000718382	0.933425	L	Lost
chr1	53923296	53924505	134.557	43.4161	25.4353	9.26372	23.4085	3.48156	53923838	53924050	53924061	+	16.5263	2.68382	-1.62604	1.05778	3.38116e-22	5.3956e-06	0.000711823	1.06877e-21	1.58973e-05	0.00137608	L	Lost
chr1	53967647	53968026	36.2865	21.9019	21.7023	10.7099	25.8409	3.24156	53967785	53967801	53967812	-	16.3333	2.9549	-0.726677	2.22822	1.062e-13	0.124686	2.85245e-07	1.54155e-13	0.153374	7.97957e-07	L	Lost
chr1	54531036	54531720	80.001	35.9964	37.5055	9.3581	32.1855	3.54467	54531304	54531326	54531337	+	16.9298	2.52282	-1.17601	1.34681	7.60344e-15	0.0041885	0.000168613	1.21753e-14	0.00669627	0.000351274	L	Lost
chr1	54541383	54542287	693.265	93.4024	293.326	31.3594	212.866	14.1728	54541818	54541791	54541802	+	11.9649	5.16032	-2.8957	2.26462	5.72099e-85	3.07307e-19	2.06007e-15	3.08144e-82	3.7782e-17	1.31746e-14	BA	Book
chr1	54642110	54642645	67.4359	9.06988	21.1884	4.34364	16.9295	0	54642547	54642275	54642286	+	4.38596	2.33308	-2.90132	-0.568235	2.43608e-11	7.07585e-08	0.246386	2.99126e-11	3.56821e-07	0.312138	L	Lost
chr1	54668788	54669130	37.4581	5.78982	20.8027	3.47389	16.875	0	54668950	54668940	54668951	-	5.40351	2.2159	-2.72696	-0.511065	5.30803e-11	2.51087e-06	0.349999	6.38488e-11	8.09744e-06	0.424692	L	Lost
chr1	54865244	54865821	94.4856	47.4766	37.0628	16.0177	31.7156	6.28952	54865348	54865367	54865378	-	16.3509	2.81123	-1.00651	1.80472	1.02194e-20	0.00678528	3.4051e-08	2.81817e-20	0.0104628	1.04746e-07	L	Lost
chr1	54883056	54883849	92.038	96.0116	22.5166	24.2229	12.9329	13.0281	54883403	54883267	54883278	-	6.40351	2.14924	0.0529422	2.20218	4.62398e-17	0.862977	4.25427e-17	9.04929e-17	0.88036	3.29139e-16	BS	Book
chr1	54916803	54917421	66.6786	15.4361	37.1008	4.24418	29.4448	0	54916983	54916943	54916954	-	14.5789	2.6704	-2.09325	0.577149	4.27941e-17	2.32183e-06	0.153842	8.40451e-17	7.55459e-06	0.20521	L	Lost
chr1	54985618	54986221	139.947	83.07	55.7942	32.9051	51.3752	23.4907	54985983	54985979	54985990	+	17.8772	3.39283	-0.748683	2.64415	6.55074e-39	0.0142946	7.57016e-22	8.94152e-38	0.0208242	9.79329e-21	BA	Book
chr1	54987501	54987881	47.1139	10.1335	23.7499	4.53748	17.7719	0	54987640	54987649	54987660	+	6.29825	2.18426	-2.27085	-0.0865887	2.9744e-10	1.15039e-05	0.854508	3.4323e-10	3.10937e-05	0.885861	L	Lost
chr1	55087178	55088194	142.4	33.1933	34.9441	6.36627	33.8953	0	55088021	55087661	55087672	-	18.4737	2.8106	-2.11245	0.698154	1.06692e-26	2.14686e-09	0.0265512	5.08622e-26	1.69654e-08	0.0411642	L	Lost
chr1	55096734	55097323	167.482	39.2764	77.9013	19.6854	81.8188	14.0082	55096948	55096897	55096908	-	9.68421	4.32511	-2.11268	2.21242	1.22344e-41	5.43336e-08	6.25639e-10	2.09249e-40	2.8369e-07	2.28671e-09	BA	Book
chr1	55108614	55109543	104.513	129.304	34.1536	34.3513	26.306	25.0552	55109178	55108958	55108969	-	11.5439	2.42185	0.301667	2.72352	4.71461e-16	0.396385	1.10535e-19	8.41009e-16	0.440741	1.11964e-18	BS	Book
chr1	55110013	55110620	68.2028	82.593	27.4544	27.6917	22.452	20.8165	55110274	55110468	55110479	+	10.4912	2.62607	0.274307	2.90038	2.30364e-15	0.479021	3.95744e-18	3.86118e-15	0.522052	3.3894e-17	BS	Book
chr1	55131859	55133394	244.955	135.377	41.6575	29.9082	35.9934	22.3958	55132382	55132354	55132365	-	17.8772	3.10106	-0.859053	2.24201	4.56981e-32	0.00744705	2.20036e-16	3.46984e-31	0.0113983	1.57222e-15	BA	Book
chr1	55142474	55143427	109.051	41.1103	30.8253	11.7735	15.2808	0	55142807	55142809	55142820	+	7.49123	2.5672	-1.43007	1.13713	9.6877e-19	0.00012432	0.000474583	2.21727e-18	0.000264221	0.000937426	L	Lost
chr1	55144862	55145065	24.5167	12.3499	22.0264	11.674	23.5013	5.48144	55144959	55144941	55144952	+	4.38596	3.46042	-0.989101	2.47132	0.00991107	0.548723	0.0701627	0.00991926	0.589552	0.100695	L	Lost
chr1	55145269	55145940	47.4333	135.676	21.6312	68.9958	22.0251	56.6614	55145539	55145610	55145621	-	16.1579	2.02808	1.51047	3.53854	2.56835e-09	0.000107591	2.16914e-27	2.83697e-09	0.000231552	5.36873e-26	BM	Book
chr1	55163568	55166086	499.424	107.392	148.327	15.63	117.055	5.27483	55165590	55163982	55163993	+	10.2456	3.36093	-2.21995	1.14098	5.41395e-37	3.21664e-11	5.14234e-05	6.19183e-36	4.3573e-10	0.000114019	L	Lost
chr1	55187132	55187986	118.245	134.408	41.2622	41.8755	34.1042	35.1958	55187837	55187820	55187831	+	6.96491	3.06658	0.182933	3.24951	6.71245e-27	0.580777	1.87021e-29	3.25996e-26	0.619928	5.84902e-28	BS	Book
chr1	55188977	55189841	113.222	119.742	46.6475	36.2846	50.4029	28.2676	55189410	55189458	55189469	-	14.5789	3.36764	0.0791469	3.44679	5.24675e-23	0.842144	1.41987e-23	1.7843e-22	0.861412	2.23886e-22	BS	Book
chr1	55252954	55253788	104.937	48.734	24.1736	13.8012	17.1269	3.62723	55253185	55253190	55253201	-	15.1053	2.37683	-1.12715	1.24968	6.99634e-17	0.00180447	6.36495e-05	1.34561e-16	0.00307802	0.000139577	L	Lost
chr1	55255490	55255968	147.922	9.74578	74.1826	4.92008	72.1467	0	55255662	55255841	55255852	+	-0.210526	3.36086	-3.94143	-0.580566	1.74055e-25	9.31085e-15	0.216585	7.43666e-25	3.41562e-13	0.278196	L	Lost
chr1	55262702	55262989	46.2095	5.2083	33.2966	3.28005	31.7026	0	55262819	0	0	0	0	2.71145	-3.06732	-0.355865	3.31247e-12	1.09323e-06	0.545735	4.30461e-12	3.90821e-06	0.618188	L	Lost
chr1	55408538	55409062	44.581	10.7099	21.6454	5.2083	20.2853	0	55408810	55408866	55408877	-	12.4561	3.98812	-2.05887	1.92924	6.7148e-21	9.93618e-05	0.000217052	1.88091e-20	0.000215482	0.00044654	L	Lost
chr1	55662213	55662653	67.0264	50.8561	35.8011	20.5551	34.126	12.3476	55662464	55662431	55662442	-	17.0877	2.82537	-0.416153	2.40921	1.30698e-19	0.259101	2.33587e-13	3.23343e-19	0.299641	1.20552e-12	BS	Book
chr1	55884109	55884647	59.5225	113.659	27.4923	46.5023	28.5644	54.5034	55884474	55884448	55884459	-	17.0877	2.75739	0.932954	3.69034	1.87873e-18	0.00766889	4.7934e-33	4.18945e-18	0.0117141	2.38846e-31	BM	Book
chr1	56023174	56023464	40.3863	4.05034	26.6496	2.60415	28.6399	0	56023297	56023183	56023194	-	2.17544	3.36855	-3.1906	0.177949	3.24142e-19	4.67825e-07	0.774538	7.7535e-19	1.8593e-06	0.819685	L	Lost
chr1	56696062	56696653	61.2886	41.5873	25.0116	17.0762	15.7843	6.2102	56696322	56696313	56696324	+	15.5614	2.40514	-0.565295	1.83985	6.37852e-14	0.149929	7.99398e-08	9.42939e-14	0.181652	2.36701e-07	L	Lost
chr1	56725549	56725909	57.1224	9.45756	32.5203	4.63186	32.8344	0	56725791	56725798	56725809	-	8.50877	2.93482	-2.64429	0.290533	8.13937e-19	1.36231e-07	0.539191	1.8781e-18	6.31777e-07	0.61198	L	Lost
chr1	56740964	56741745	126.563	18.6269	42.4813	5.30776	44.0572	0	56741475	56741504	56741515	+	9.14035	3.63347	-2.81434	0.819132	2.7836e-30	9.62678e-11	0.040622	1.81298e-29	1.13544e-09	0.0610113	L	Lost
chr1	56754356	56754870	51.6897	9.55194	20.8501	4.34364	12.0635	0	56754575	56754675	56754686	+	4.22807	2.73854	-2.43416	0.30438	1.81835e-17	5.78559e-07	0.506931	3.69185e-17	2.23704e-06	0.58115	L	Lost
chr1	56780232	56781129	125.858	32.7112	43.3525	6.75395	40.7402	0	56780698	56780923	56780934	-	7.98246	3.12952	-1.95706	1.17246	2.3093e-30	4.29225e-08	0.000286471	1.51775e-29	2.30786e-07	0.000581875	L	Lost
chr1	56901308	56901790	119.13	12.832	67.4929	5.59598	79.0005	0	56901593	56901639	56901650	-	9.2807	4.05229	-3.20604	0.846248	7.79532e-44	3.79774e-14	0.0397821	1.60023e-42	1.1726e-12	0.0598557	L	Lost
chr1	56924096	56924847	66.6501	80.4608	21.2454	22.1901	16.9261	18.8148	56924417	56924394	56924405	+	16.3333	2.88505	0.277753	3.1628	5.12705e-18	0.468542	5.1211e-21	1.09281e-17	0.51198	6.04642e-20	BS	Book
chr1	56995374	56995698	72.4876	9.55194	59.5889	5.78982	64.2677	0	56995509	0	0	0	0	4.79718	-2.92223	1.87495	1.7631e-37	1.02633e-09	0.000188077	2.10215e-36	8.89566e-09	0.000390028	L	Lost
chr1	57009950	57010784	175.005	46.89	69.1783	11.4853	63.2832	2.67287	57010543	57010524	57010535	+	3.89474	2.8488	-1.89606	0.952738	2.32706e-24	1.59059e-07	0.00242161	8.96608e-24	7.21569e-07	0.004376	L	Lost
chr1	57390507	57391267	106.165	21.1316	24.1594	6.17751	23.5472	0	57391149	57391149	57391160	-	9.98246	2.56119	-2.34027	0.220921	1.18084e-18	8.87751e-09	0.544424	2.68473e-18	5.85911e-08	0.617011	L	Lost
chr1	57425779	57426505	78.3013	22.6772	36.2391	8.10575	36.9549	0	57426134	57426183	57426194	+	14.5439	2.61503	-1.81369	0.80134	1.15718e-19	3.38076e-06	0.0235637	2.87772e-19	1.05103e-05	0.0368695	L	Lost
chr1	57518208	57518878	84.9578	57.4111	28.7209	19.2977	41.5982	10.9728	57518476	57518419	57518430	+	18.1053	3.40442	-0.569771	2.83465	1.94533e-27	0.115685	9.27216e-18	9.922e-27	0.143153	7.64784e-17	BS	Book
chr1	57527172	57527758	69.5784	11.5796	25.8638	3.86158	17.596	0	57527386	57527354	57527365	-	4.15789	2.20809	-2.61239	-0.404293	2.27689e-11	1.33947e-07	0.366747	2.80136e-11	6.22631e-07	0.442105	L	Lost
chr1	57668852	57670531	409.272	130.144	81.9869	33.0938	108.403	24.0558	57670277	57669087	57669098	-	10.1579	3.27696	-1.64588	1.63109	1.42263e-44	1.71195e-08	5.30209e-11	3.10246e-43	1.03717e-07	2.15649e-10	BA	Book
chr1	57670696	57671734	103.656	55.9598	27.5161	14.472	25.0127	6.23856	57671095	57671115	57671126	+	13.7544	2.52254	-0.886832	1.63571	4.7454e-20	0.00949068	3.90743e-08	1.22649e-19	0.01426	1.1944e-07	L	Lost
chr1	57750075	57750870	133.705	82.6874	37.0723	22.866	36.7128	12.6695	57750663	57750436	57750447	+	16.5614	2.85672	-0.693165	2.16355	4.73369e-30	0.0222304	4.42157e-16	3.0199e-29	0.031272	3.0415e-15	BA	Book
chr1	57782191	57782877	66.2454	75.5509	25.8353	23.6363	17.9238	15.8544	57782538	57782547	57782558	+	18.1053	2.0328	0.186385	2.21919	1.18903e-11	0.603596	3.07489e-13	1.48834e-11	0.641481	1.56832e-12	BS	Book
chr1	58053057	58053529	67.4834	26.0466	29.5778	10.4217	18.8296	5.08635	58053171	58053108	58053119	-	4.64912	2.09859	-1.3562	0.742382	5.35674e-08	0.00652098	0.0812598	5.65505e-08	0.0100832	0.115184	L	Lost
chr1	58055124	58055595	36.2343	10.4217	21.6881	7.33547	14.7383	0	58055240	58055191	58055202	-	5.2807	2.15721	-1.8243	0.33291	2.33878e-09	0.000423531	0.480004	2.5882e-09	0.000810286	0.555108	L	Lost
chr1	58116177	58116936	79.6153	108.068	23.3641	27.985	22.5981	15.0014	58116406	58116557	58116568	-	17.9123	2.35295	0.438023	2.79097	4.57748e-16	0.197468	6.48176e-22	8.17514e-16	0.233799	8.4432e-21	BS	Book
chr1	58346925	58347603	103.713	14.6659	37.1055	4.1498	29.8869	0	58347442	58347411	58347422	-	5.98246	3.00769	-2.82407	0.183612	9.12445e-22	4.48128e-10	0.657031	2.77238e-21	4.36587e-09	0.718823	L	Lost
chr1	58352717	58354028	93.3614	99.4804	21.2738	13.8956	17.107	5.03577	58353160	58353940	58353951	+	13.7193	1.49512	0.0881401	1.58326	2.85153e-09	0.775529	7.41858e-10	3.14455e-09	0.801047	2.6935e-09	L	Lost
chr1	58423699	58423918	30.3636	4.05034	21.2217	2.12209	11.0576	0	58423797	58423853	58423864	-	1.17544	2.01607	-2.7814	-0.76533	3.53198e-08	1.71476e-05	0.20936	3.74627e-08	4.42992e-05	0.269937	L	Lost
chr1	58426411	58426889	154.912	19.8742	108.274	8.39397	110.04	3.06312	58426764	58426728	58426739	+	13.7544	4.54719	-2.95021	1.59698	7.64387e-36	2.27227e-10	0.000214382	8.03032e-35	2.40352e-09	0.00044153	L	Lost
chr1	58480843	58481703	109.098	41.1052	39.5578	10.6155	33.7434	3.39572	58481597	58481521	58481532	-	13.8947	2.82264	-1.41406	1.40858	3.02767e-16	0.00114921	0.000171845	5.48843e-16	0.00203032	0.000357568	L	Lost
chr1	58511499	58511971	73.7398	35.6087	32.0918	14.9592	25.8669	7.05287	58511750	58511651	58511662	-	8.82456	2.79369	-1.07243	1.72127	1.17081e-20	0.00398677	2.72102e-07	3.21173e-20	0.00640091	7.62888e-07	L	Lost
chr1	58638864	58639800	71.7018	84.4218	21.6596	23.0598	19.1489	16.5268	58639228	58639201	58639212	+	17.9123	3.59313	0.237569	3.8307	6.73737e-25	0.535379	1.25016e-27	2.72263e-24	0.576895	3.20164e-26	BS	Book
chr1	58652725	58653038	35.02	47.4715	20.4264	26.6281	14.8728	22.37	58652861	58652860	58652871	+	13.7193	2.66839	0.437486	3.10588	2.60463e-12	0.3077	4.21702e-16	3.41128e-12	0.35021	2.90905e-15	BS	Book
chr1	58826162	58826422	39.5958	6.27189	29.5683	4.63186	28.0437	0	58826296	58826243	58826254	-	6.64912	3.84729	-2.67311	1.17418	7.14741e-23	1.82082e-06	0.0381087	2.40536e-22	6.09749e-06	0.0575267	L	Lost
chr1	58936385	58936748	42.9145	10.4217	24.5831	6.46573	16.9261	0	58936460	58936450	58936461	+	13.8421	5.11649	-2.06901	3.04749	9.68288e-26	4.06675e-05	1.30469e-07	4.2325e-25	9.58181e-05	3.79107e-07	L	Lost
chr1	59014131	59015457	331.17	195.298	156.626	65.3128	141.98	61.7656	59014945	59014936	59014947	+	15.1404	3.98307	-0.764471	3.2186	1.03503e-51	0.0142246	8.79113e-33	3.90241e-50	0.020732	4.21341e-31	BA	Book
chr1	59017952	59018682	151.27	20.5501	80.0058	6.36627	67.8754	0	59018258	59018263	59018274	-	9.21053	3.19883	-2.87043	0.328401	2.08595e-25	1.59957e-11	0.39012	8.8578e-25	2.35582e-10	0.466239	L	Lost
chr1	59029606	59030446	94.9473	91.191	30.8491	23.6414	17.3252	15.0799	59029952	59030240	59030251	-	10.0877	2.48212	-0.0642092	2.41791	1.28378e-11	0.885142	8.18023e-11	1.60345e-11	0.89959	3.26718e-10	BS	Book
chr1	59156784	59157061	42.5287	7.91191	29.1968	4.8257	18.8813	0	59156865	59156875	59156886	-	9.49123	2.09151	-2.43043	-0.338918	7.84052e-10	5.83862e-06	0.493537	8.86457e-10	1.70515e-05	0.568294	L	Lost
chr1	59212639	59212971	42.9382	7.14163	25.8591	2.99183	23.3483	0	59212859	59212895	59212906	-	7.17544	2.33023	-2.65147	-0.321245	2.20408e-13	6.33391e-07	0.523156	3.11734e-13	2.42528e-06	0.596314	L	Lost
chr1	59304492	59305076	94.1899	27.6917	57.0939	9.74578	42.351	3.39017	59304697	59304713	59304724	+	11.9649	2.9071	-1.76872	1.13838	6.70156e-21	1.15186e-05	0.00158846	1.87735e-20	3.11219e-05	0.00294205	L	Lost
chr1	59313358	59314099	237.304	24.9932	113.26	8.10575	103.694	0	59313770	59313781	59313792	+	1.15789	3.26085	-3.26788	-0.00702351	1.45455e-27	3.62874e-15	0.98472	7.50226e-27	1.48893e-13	0.98834	L	Lost
chr1	59320390	59321259	101.575	39.5646	30.8158	10.9037	31.2956	5.02098	59320628	59320578	59320589	-	17.8772	3.05759	-1.37996	1.67763	1.0904e-26	0.000114292	1.90168e-07	5.1945e-26	0.000244546	5.42404e-07	L	Lost
chr1	59322067	59322684	52.5039	14.6659	22.9024	4.43802	18.9646	0	59322455	59322470	59322481	+	17.8772	2.44531	-1.84195	0.603359	3.01713e-14	4.0513e-05	0.140945	4.5931e-14	9.55003e-05	0.189706	L	Lost
chr1	59378334	59379740	272.315	55.2839	70.3309	12.0617	68.5483	6.64183	59379172	59378992	59379003	+	13.807	3.24844	-2.29659	0.95185	2.42373e-37	3.4913e-12	0.000957661	2.85472e-36	6.23856e-11	0.00182246	L	Lost
chr1	59432795	59433796	203.951	52.6849	54.9562	11.192	43.4881	3.11747	59433456	59433346	59433357	-	5.07018	2.69193	-1.9603	0.731626	2.87357e-21	1.00755e-07	0.0203089	8.33765e-21	4.8516e-07	0.0321173	L	Lost
chr1	59434015	59435030	313.553	90.2116	124.954	22.6772	92.8161	10.9459	59434211	59434197	59434208	+	9.64912	3.29022	-1.79587	1.49435	1.60454e-38	1.68816e-08	4.61203e-08	2.11198e-37	1.02476e-07	1.39932e-07	BA	Book
chr1	59448415	59448735	40.829	6.46573	23.3214	3.47389	14.9437	0	59448551	59448449	59448460	+	2.07018	2.32889	-2.70613	-0.377234	3.54119e-11	2.63029e-06	0.484329	4.30816e-11	8.43208e-06	0.559423	L	Lost
chr1	59453014	59453483	51.1663	16.5941	21.2074	8.39397	17.0043	0	59453213	59453400	59453411	+	9.42105	1.78964	-1.61177	0.177877	1.05835e-07	0.000525806	0.663618	1.10887e-07	0.000986409	0.724698	L	Lost
chr1	59479584	59480857	406.053	120.99	100.77	21.0321	94.3208	10.4236	59480071	59479708	59479719	+	6.47368	3.20722	-1.74577	1.46146	1.28935e-30	5.65215e-07	5.81429e-07	8.67053e-30	2.19244e-06	1.57799e-06	BA	Book
chr1	59483735	59484505	112.883	10.9037	37.5292	4.1498	24.3878	0	59483898	59484470	59484481	-	-0.54386	2.20412	-3.39112	-1.187	2.82068e-14	6.72182e-13	0.00593804	4.30409e-14	1.46871e-11	0.0101774	L	Lost
chr1	59495888	59496303	43.3382	30.7779	21.2359	13.99	12.0752	5.99119	59495996	59496018	59496029	-	15.1754	2.06035	-0.489699	1.57065	1.18249e-11	0.193942	2.37316e-06	1.48037e-11	0.229978	6.08084e-06	L	Lost
chr1	59529021	59529936	154.969	24.7993	47.057	6.27189	39.1594	0	59529624	59529126	59529137	-	5.52632	2.76363	-2.66094	0.10269	1.38461e-22	1.46103e-11	0.769466	4.53252e-22	2.17539e-10	0.815615	L	Lost
chr1	59531910	59532791	160.712	53.3506	68.7261	18.7162	64.4215	9.8122	59532205	59532207	59532218	-	16.5263	3.08754	-1.57923	1.50831	5.27886e-32	1.81882e-06	2.51057e-07	3.99037e-31	6.09318e-06	7.06278e-07	L	Lost
chr1	59543826	59544776	229.133	22.8609	115.85	7.81245	111.301	4.33374	59544463	59543911	59543922	+	3.70175	3.54509	-3.28653	0.258555	4.78011e-32	2.61622e-15	0.485453	3.62709e-31	1.10693e-13	0.560608	L	Lost
chr1	59565186	59565658	55.7468	5.78982	21.6407	2.99183	17.5043	0	59565367	59565510	59565521	-	2.84211	2.53372	-3.30002	-0.766298	1.58096e-14	1.31503e-08	0.162776	2.46379e-14	8.233e-08	0.215836	L	Lost
chr1	59572785	59573180	43.7715	9.06988	20.4453	5.78982	12.8382	0	59573075	59572939	59572950	+	5.50877	1.61433	-2.2775	-0.663165	4.93456e-06	2.48534e-05	0.17236	5.02217e-06	6.16393e-05	0.227186	L	Lost
chr1	59577765	59578556	136.538	91.4741	41.6148	26.3399	36.7474	15.1913	59578193	59578161	59578172	+	17.3158	2.51491	-0.583033	1.93188	3.53505e-20	0.0817617	1.31083e-11	9.26508e-20	0.104055	5.68368e-11	BS	Book
chr1	59579205	59579586	71.2164	14.472	36.2438	8.10575	32.5021	0	59579436	59579538	59579549	-	2.40351	3.47667	-2.2892	1.18747	1.91161e-26	2.13106e-07	0.00462743	8.89923e-26	9.30333e-07	0.00804996	L	Lost
chr1	59617744	59618290	67.4929	23.9245	24.1546	7.42985	14.791	0	59617898	59617903	59617914	-	9.2807	2.06649	-1.47033	0.596157	1.18718e-12	0.000176321	0.0858531	1.58914e-12	0.000363316	0.121118	L	Lost
chr1	59663583	59663793	39.5531	6.65957	27.0639	3.95596	14.7703	0	59663681	59663671	59663682	-	3.66667	2.08844	-2.64694	-0.558508	1.02076e-08	7.27323e-06	0.306203	1.10065e-08	2.0738e-05	0.377887	L	Lost
chr1	59685905	59686528	97.3521	27.3091	38.6629	10.6155	42.5212	0	59686175	59686222	59686233	-	10.8246	2.85068	-1.85162	0.999065	5.9782e-17	2.89458e-05	0.0102395	1.15774e-16	7.05818e-05	0.0169632	L	Lost
chr1	59725284	59726090	74.864	22.2896	22.4786	8.39906	21.9851	2.26234	59725689	59725448	59725459	+	8.26316	2.39853	-1.7581	0.640426	1.20364e-12	9.15534e-05	0.105077	1.61028e-12	0.000199941	0.145576	L	Lost
chr1	59728054	59728763	82.8533	74.3036	25.8306	20.4557	13.9187	12.1241	59728439	59728437	59728448	-	12.4912	2.15259	-0.166414	1.98618	1.61921e-11	0.66919	1.46953e-09	2.01048e-11	0.703087	5.17276e-09	BS	Book
chr1	59754768	59755462	100.399	15.5356	57.8845	5.40214	39.7494	0	59754880	59754836	59754847	+	13.8421	3.50941	-2.71277	0.796639	2.90991e-33	5.74655e-11	0.0422971	2.45383e-32	7.24899e-10	0.0632918	L	Lost
chr1	59784754	59785721	191.661	35.7974	62.9266	8.78166	42.2607	0	59785602	59785593	59785604	+	12.9123	3.20219	-2.42579	0.776399	2.76245e-27	4.56891e-10	0.0229195	1.38769e-26	4.43977e-09	0.035936	L	Lost
chr1	59806758	59806941	23.3166	5.30776	23.3166	5.30776	19.6844	0	59806839	59806778	59806789	-	14.1579	3.93513	-2.15691	1.77821	8.64838e-06	0.0508054	0.0715355	8.77798e-06	0.0672012	0.1025	L	Lost
chr1	59908834	59909373	39.1957	47.5709	13.3509	20.8434	12.0069	13.2387	59909078	59909059	59909070	-	8.64912	2.67308	0.273058	2.94614	5.60405e-12	0.539582	5.68529e-14	7.16269e-12	0.580871	3.12167e-13	BS	Book
chr1	59964190	59965100	132.495	28.5614	40.029	7.62369	34.8646	0	59964603	59964546	59964557	+	14.3158	2.70313	-2.22301	0.48012	1.47662e-19	3.07151e-08	0.173936	3.63245e-19	1.72788e-07	0.228944	L	Lost
chr1	59981326	59981861	52.4707	6.36627	27.9256	3.08621	21.9811	0	59981477	59981435	59981446	+	10.1053	2.59551	-2.97549	-0.37998	2.51325e-16	3.12997e-08	0.456509	4.59093e-16	1.75727e-07	0.532017	L	Lost
chr1	59982982	59983698	95.3615	49.8869	42.9003	18.9151	41.8828	8.89671	59983245	59983213	59983224	-	11.1754	2.36365	-0.94228	1.42137	1.27455e-13	0.0183889	3.19244e-05	1.83766e-13	0.0262556	7.23641e-05	L	Lost
chr1	60043493	60043921	48.2571	8.68219	28.2924	3.28005	25.4487	0	60043626	60043619	60043630	-	13.0702	2.50787	-2.44161	0.0662677	3.48769e-11	1.14197e-05	0.896316	4.24474e-11	3.08893e-05	0.919623	L	Lost
chr1	60113207	60113541	67.8644	3.95596	47.895	2.31593	34.7717	0	60113314	60113310	60113321	+	4.12281	2.76914	-4.10597	-1.33683	5.30378e-19	1.52499e-10	0.0306059	1.24428e-18	1.6922e-09	0.0469571	L	Lost
chr1	60253827	60254126	41.6765	9.64632	27.0828	4.43802	16.6831	0	60253932	60253907	60253918	+	6.36842	2.40872	-2.06349	0.345237	5.84392e-12	5.03903e-05	0.461959	7.46056e-12	0.00011609	0.537519	L	Lost
chr1	60465512	60466317	98.6233	111.06	35.7726	36.4734	28.0456	25.5281	60466114	60465657	60465668	-	5.4386	2.6022	0.168615	2.77081	4.8482e-16	0.659008	1.15969e-17	8.63863e-16	0.693464	9.46641e-17	BS	Book
chr1	60489431	60489871	49.1615	7.61861	20.4026	4.05034	17.7551	0	60489673	0	0	0	0	2.73142	-2.59526	0.136162	5.79212e-12	8.21905e-06	0.798779	7.39582e-12	2.31239e-05	0.839475	L	Lost
chr1	60518431	60518969	104.042	8.68219	54.9088	3.66774	88.7704	0	60518691	60518712	60518723	+	8.45614	3.92055	-3.54879	0.371759	2.24391e-27	3.71754e-11	0.462107	1.13595e-26	4.9489e-10	0.537672	L	Lost
chr1	60653792	60654182	53.7087	8.2996	29.5636	4.53748	18.2429	0	60653916	60653934	60653945	+	10.6316	2.55794	-2.74656	-0.188622	1.47737e-13	3.61585e-07	0.706713	2.11839e-13	1.48095e-06	0.762255	L	Lost
chr1	60835517	60835805	38.2913	4.8257	24.5404	4.1498	15.6384	0	60835687	60835621	60835632	+	3.78947	2.10249	-3.07169	-0.969194	3.29048e-10	7.6673e-07	0.100213	3.78738e-10	2.86599e-06	0.139451	L	Lost
chr1	60875603	60876043	105.356	9.7407	61.6222	5.69036	55.741	2.21797	60875722	60875604	60875615	+	14.3158	4.37467	-3.35279	1.02187	1.86541e-30	2.03844e-10	0.0418355	1.23752e-29	2.18065e-09	0.0626785	L	Lost
chr1	60893910	60894145	33.3203	2.50977	20.8264	1.83387	10.75	0	60894015	60894134	60894145	-	8.26316	1.91456	-3.87052	-1.95596	8.85301e-08	2.10685e-06	0.0128278	9.29598e-08	6.93422e-06	0.0209232	L	Lost
chr1	60896063	60896526	91.5953	12.1561	48.7188	7.04217	56.4691	0	60896191	60896275	60896286	+	7.91228	3.34117	-2.89608	0.445095	9.79116e-28	1.35004e-10	0.294583	5.12484e-27	1.52551e-09	0.365197	L	Lost
chr1	60907612	60908514	236.346	18.3336	94.6469	4.63186	94.1616	0	60907984	60907880	60907891	+	7.98246	3.52692	-3.70285	-0.175925	5.33577e-36	3.28953e-19	0.639359	5.67227e-35	4.00085e-17	0.703504	L	Lost
chr1	60908887	60909231	50.8754	19.2977	29.611	8.58782	18.0233	0	60909109	60909008	60909019	+	5.29825	2.7152	-1.4038	1.3114	5.27787e-13	0.00362245	0.00238283	7.26401e-13	0.00585644	0.00430914	L	Lost
chr1	60909326	60910614	280.489	97.3583	63.3504	16.5941	47.5939	8.17017	60909791	60909776	60909787	-	6.5614	2.69186	-1.52907	1.16278	7.15203e-18	9.99958e-05	0.000377062	1.50543e-17	0.000216732	0.00075379	L	Lost
chr1	60910874	60911465	78.8484	45.6427	27.954	15.63	19.5296	7.33021	60911041	60911028	60911039	+	4.94737	2.72378	-0.79894	1.92484	1.28289e-15	0.0556333	1.09831e-07	2.19905e-15	0.073049	3.21719e-07	L	Lost
chr1	60914318	60915009	195.422	45.4489	83.7625	13.99	63.4024	3.43335	60914653	60914644	60914655	+	13.7544	3.2298	-2.11493	1.11487	1.39109e-29	9.28291e-09	0.000539058	8.54988e-29	6.0775e-08	0.00105752	L	Lost
chr1	61354243	61354593	49.5615	5.78982	31.2538	3.47389	26.3907	0	61354352	61354364	61354375	+	7.80702	2.96328	-3.13118	-0.167902	2.01473e-19	3.21821e-08	0.758702	4.90605e-19	1.79924e-07	0.806319	L	Lost
chr1	61476634	61477300	93.2428	23.3531	36.2106	6.27189	33.8537	0	61476884	61476957	61476968	+	0.77193	2.4222	-2.02466	0.397534	8.14694e-17	4.13673e-07	0.264809	1.55699e-16	1.66534e-06	0.332622	L	Lost
chr1	62219609	62220104	46.6238	12.1561	22.8834	5.8842	24.9796	0	62219775	62219787	62219798	-	15.1404	2.55384	-1.92218	0.631662	6.32796e-15	3.41809e-05	0.141736	1.02086e-14	8.19979e-05	0.19064	L	Lost
chr1	62227874	62228947	541.723	130.337	312.533	40.5186	214.153	33.6492	62228441	62228405	62228416	+	18.1053	4.55297	-2.04969	2.50329	1.08772e-66	1.56035e-10	2.08883e-19	1.352e-64	1.7258e-09	2.05034e-18	BA	Book
chr1	62372016	62372274	31.5922	5.11392	20.7884	3.47389	24.2941	0	62372119	62372021	62372032	-	0.947368	2.92028	-2.63828	0.282002	3.08693e-12	4.64161e-05	0.647465	4.02045e-12	0.000107857	0.710355	L	Lost
chr1	62439582	62439900	41.6291	11.3858	27.4686	6.07804	25.3002	0	62439709	62439653	62439664	+	14.807	2.71376	-1.88149	0.832271	1.24844e-14	0.000119763	0.067835	1.96298e-14	0.000255351	0.0976268	L	Lost
chr1	62444320	62445273	115.407	27.1153	37.9198	7.33547	34.124	0	62445024	62444757	62444768	-	5.50877	2.45937	-2.10801	0.351361	2.84413e-20	1.03437e-08	0.284837	7.52102e-20	6.6894e-08	0.354497	L	Lost
chr1	62694691	62695254	83.1822	27.6866	32.4491	9.16426	23.3597	3.22433	62694917	62695011	62695022	-	9.73684	2.42388	-1.56716	0.856722	4.07589e-13	0.000318204	0.0238278	5.65466e-13	0.000623383	0.0372483	L	Lost
chr1	62696881	62697746	151.975	21.8126	59.9652	5.69545	51.3752	0	62697348	62697387	62697398	-	16.1579	3.0405	-2.84848	0.192014	4.34322e-21	1.43354e-10	0.625487	1.23806e-20	1.6033e-09	0.691199	L	Lost
chr1	62754303	62754983	69.893	30.102	23.7119	11.192	14.1519	0	62754774	62754682	62754693	-	3.31579	1.44735	-1.21047	0.236872	9.53608e-06	0.00496272	0.517476	9.67464e-06	0.00783001	0.591071	L	Lost
chr1	62762129	62762920	185.262	88.6711	66.6217	26.6332	62.7323	12.7695	62762480	62762572	62762583	-	10.6316	3.4723	-1.06463	2.40767	1.79529e-45	0.000287141	4.94324e-20	4.22173e-44	0.000567079	5.2109e-19	BA	Book
chr1	62767345	62767808	59.5415	25.5696	24.5736	8.87604	14.9657	3.97005	62767567	62767566	62767577	+	4.84211	2.44451	-1.22691	1.21759	1.79905e-16	0.00143039	0.000445636	3.32845e-16	0.00248451	0.000883693	L	Lost
chr1	62783143	62783664	100.018	16.8823	34.1868	5.40214	21.3129	0	62783464	62783322	62783333	+	4.2807	2.59612	-2.53774	0.0583818	3.21524e-20	6.34275e-10	0.875805	8.45888e-20	5.89667e-09	0.903221	L	Lost
chr1	62784307	62784979	157.211	28.462	56.3081	8.10575	49.011	0	62784715	62784975	62784986	+	6.68421	2.91356	-2.4592	0.454362	8.78967e-30	4.33406e-12	0.155035	5.48978e-29	7.53806e-11	0.206631	L	Lost
chr1	62789970	62790294	59.5699	9.06988	36.2391	5.78982	22.6578	0	62790099	0	0	0	0	2.4757	-2.72285	-0.247145	2.08294e-14	7.91815e-08	0.599254	3.21743e-14	3.94027e-07	0.667905	L	Lost
chr1	62806624	62807192	54.9942	10.8094	21.2406	4.63186	13.411	0	62806947	62806957	62806968	+	6.87719	1.8759	-2.4099	-0.534003	3.13668e-09	8.83197e-07	0.230973	3.45283e-09	3.24345e-06	0.294585	L	Lost
chr1	62813852	62814821	700.721	92.6169	293.312	27.3984	227.003	16.2205	62814310	62814311	62814322	+	5.38596	4.40165	-2.91432	1.48733	5.97434e-50	4.68147e-15	2.38773e-06	1.96823e-48	1.88219e-13	6.11723e-06	BA	Book
chr1	62823602	62824819	369.752	94.0681	117.812	19.7849	113.612	11.1323	62824389	62823950	62823961	-	12.193	3.48207	-1.9713	1.51077	1.77064e-41	1.16278e-09	5.16976e-08	2.99667e-40	9.92732e-09	1.55961e-07	BA	Book
chr1	62830164	62830510	103.741	10.6104	72.0544	6.65449	53.9987	0	62830306	0	0	0	0	3.22782	-3.23424	-0.00641584	2.14016e-23	3.29757e-11	0.988663	7.54281e-23	4.45625e-10	0.99141	L	Lost
chr1	62949395	62949985	47.8855	55.5772	15.4269	24.5111	6.12527	12.4814	62949671	62949649	62949660	+	11.6316	1.58267	0.211018	1.79369	8.33286e-08	0.554682	2.54875e-09	8.75605e-08	0.595182	8.76081e-09	BM	Book
chr1	62957951	62958346	75.3304	12.9264	47.0333	6.17242	43.8139	0	62958167	62958237	62958248	+	15.5439	3.07166	-2.50362	0.568045	2.41713e-21	5.42095e-08	0.183608	7.06768e-21	2.83173e-07	0.240174	L	Lost
chr1	62996744	62997230	47.0855	15.9182	20.8691	7.23601	17.821	0	62996978	62996954	62996965	+	9.84211	2.09408	-1.54443	0.549649	4.78746e-10	0.000775458	0.180186	5.46961e-10	0.00141365	0.236187	L	Lost
chr1	63014234	63014828	93.3092	40.9114	42.8955	14.3776	38.3914	5.54709	63014567	63014563	63014574	+	6.14035	2.97228	-1.1956	1.77668	1.71323e-27	0.000427238	7.87818e-09	8.77907e-27	0.000816666	2.57966e-08	L	Lost
chr1	63113300	63113872	85.8005	20.3613	33.3156	8.78166	31.9965	0	63113406	63113813	63113824	+	3.36842	3.22294	-2.09956	1.12337	2.55191e-23	9.74096e-07	0.00422206	8.92907e-23	3.53292e-06	0.00739291	L	Lost
chr1	63183176	63183755	51.2327	12.3499	23.7641	4.63186	17.8254	0	63183643	0	0	0	0	2.19436	-2.05042	0.143945	7.19108e-11	2.33199e-05	0.742667	8.58512e-11	5.82749e-05	0.792731	L	Lost
chr1	63184077	63186199	665.543	263.419	167.568	71.7887	157.874	61.0229	63185317	63185754	63185765	+	16.3333	4.17216	-1.3389	2.83327	2.49511e-60	1.48799e-05	1.86575e-27	1.9069e-58	3.91077e-05	4.64835e-26	BA	Book
chr1	63190508	63191246	65.0216	45.9258	21.6739	10.9037	17.1536	3.7264	63190816	63190847	63190858	-	17.8772	2.3011	-0.498697	1.80241	3.05932e-16	0.147914	2.73846e-09	5.54432e-16	0.179467	9.37586e-09	L	Lost
chr1	63192407	63192824	57.9414	22.1901	32.525	10.9981	29.8345	5.4205	63192714	63192703	63192714	+	17.8772	3.14631	-1.37688	1.76943	7.09913e-15	0.00612366	8.22783e-05	1.14001e-14	0.00951351	0.00017824	L	Lost
chr1	63207238	63208058	99.1847	111.731	32.9298	38.3072	26.2932	37.4339	63207746	63207734	63207745	-	16.5614	3.00039	0.171257	3.17164	2.77989e-22	0.633948	3.09218e-24	8.85136e-22	0.670106	5.29934e-23	BS	Book
chr1	63222594	63223831	199.432	289.088	57.0133	48.1525	44.5142	35.3613	63223143	63223052	63223063	+	9.24561	2.27401	0.534783	2.80879	4.31512e-09	0.260933	3.96143e-13	4.71913e-09	0.301585	2.00094e-12	BS	Book
chr1	63248193	63248970	99.0328	27.7912	44.1146	8.10575	45.756	0	63248519	63248875	63248886	+	2.14035	2.57715	-1.85221	0.724945	3.18262e-18	2.67852e-06	0.0381443	6.92503e-18	8.56809e-06	0.0575702	L	Lost
chr1	63250670	63251509	147.404	48.7238	49.5473	9.26372	49.1397	0	63251067	63250844	63250855	+	5.98246	2.64979	-1.59454	1.05526	1.60141e-24	1.90197e-06	0.000314026	6.26045e-24	6.334e-06	0.000634125	L	Lost
chr1	63253817	63254594	109.893	23.1542	43.6813	8.20013	35.5151	0	63254380	63254128	63254139	-	7.15789	2.57168	-2.23067	0.341016	3.2613e-21	4.31523e-09	0.318326	9.41436e-21	3.12882e-08	0.390759	L	Lost
chr1	63256836	63257363	77.0586	20.2618	25.8259	7.62369	16.5842	2.4039	63257114	63257229	63257240	-	-0.298246	2.65516	-1.92734	0.727822	2.38723e-18	3.09839e-06	0.0514789	5.26184e-18	9.73407e-06	0.0757615	L	Lost
chr1	63262910	63263126	36.1916	6.94779	24.9452	4.1498	17.2124	0	63263023	63262997	63263008	-	11.0526	2.3104	-2.41008	-0.0996811	2.09088e-09	4.58171e-05	0.855168	2.31847e-09	0.000106604	0.886302	L	Lost
chr1	63285846	63286300	62.9171	17.951	28.3256	8.01138	12.6696	0	63286150	63286118	63286129	-	16.1228	2.20922	-1.86167	0.347548	1.08394e-13	8.86774e-06	0.35817	1.57212e-13	2.47133e-05	0.433367	L	Lost
chr1	63293714	63294357	127.924	35.1215	58.7272	10.6155	51.0734	3.91182	63294131	63294043	63294054	+	3.82456	3.01846	-1.86763	1.15082	1.95066e-17	3.83162e-05	0.00331228	3.94961e-17	9.08456e-05	0.0058809	L	Lost
chr1	63369794	63370364	64.9457	15.5356	34.1488	5.30776	32.8658	0	63370225	0	0	0	0	3.32976	-2.08312	1.24664	6.10981e-24	2.22572e-06	0.00271161	2.26509e-23	7.27886e-06	0.00487254	L	Lost
chr1	63407881	63408410	60.8696	28.7502	24.1878	13.5079	24.6134	5.02798	63408242	63408365	63408376	-	0.280702	2.60391	-1.06951	1.5344	5.35895e-18	0.0048554	7.56774e-06	1.14031e-17	0.00767353	1.83824e-05	L	Lost
chr1	63450284	63450952	121.687	28.1687	53.3562	8.20013	41.3013	0	63450441	63450413	63450424	-	8.08772	2.84044	-2.08773	0.752704	2.78646e-20	3.01414e-07	0.0362862	7.37255e-20	1.26567e-06	0.0549888	L	Lost
chr1	63488419	63489184	106.232	35.2159	32.9108	11.5796	23.253	2.5039	63489040	63488639	63488650	+	8.24561	2.63208	-1.58907	1.043	5.14262e-19	3.27437e-05	0.00190577	1.20831e-18	7.88623e-05	0.00349351	L	Lost
chr1	63542959	63543443	50.8375	49.0171	20.8406	19.4865	12.839	9.54476	63543233	63543262	63543273	-	9.14035	2.07675	-0.058302	2.01844	8.51569e-11	0.879745	1.11245e-09	1.01259e-10	0.894776	3.96936e-09	L	Lost
chr1	63851001	63851462	37.5103	31.8415	22.1023	11.0032	10.6907	4.1495	63851118	63851197	63851208	-	1.21053	1.96793	-0.241843	1.72609	2.22957e-08	0.574157	3.45039e-06	2.37814e-08	0.613692	8.69465e-06	L	Lost
chr1	63967764	63968246	69.1261	43.0335	28.7256	17.5633	26.6666	7.76025	63967998	63968017	63968028	+	16.9298	2.75858	-0.687189	2.07139	1.40248e-19	0.0620819	2.97501e-10	3.45935e-19	0.08076	1.12105e-09	L	Lost
chr1	63984313	63984801	49.171	11.8679	25.0116	4.63186	15.4299	0	63984432	63984498	63984509	-	10.4912	2.60568	-2.05449	0.551196	4.76703e-14	2.60302e-05	0.219901	7.12535e-14	6.42388e-05	0.281996	L	Lost
chr1	64053160	64053713	56.1942	18.6167	20.8074	6.17242	14.524	0	64053352	64053393	64053404	-	9.7193	2.15275	-1.55145	0.601305	4.53287e-11	0.000439097	0.124677	5.47867e-11	0.000836931	0.169866	L	Lost
chr1	64055689	64055955	34.5678	6.75395	23.3261	3.95596	11.8402	0	64055779	0	0	0	0	2.46974	-2.35588	0.113862	4.52607e-11	4.31626e-05	0.832644	5.47124e-11	0.000101002	0.867916	L	Lost
chr1	64272581	64273414	104.994	14.2782	22.9024	4.1498	10.2542	0	64272773	64273200	64273211	+	9.38596	2.08017	-2.85805	-0.777886	2.08258e-11	6.33734e-10	0.0592151	2.56863e-11	5.89487e-09	0.086164	L	Lost
chr1	64274930	64275263	58.6703	5.98367	35.3394	3.37952	37.2443	0	64275045	64275017	64275028	+	7.61404	2.82495	-3.36238	-0.537431	8.49686e-17	8.49245e-09	0.332045	1.62034e-16	5.65269e-08	0.405245	L	Lost
chr1	64357989	64358777	244.813	63.0071	101.571	17.6577	96.0594	7.38446	64358190	64358245	64358256	-	10.6316	3.4789	-1.96199	1.51691	1.8081e-40	2.61448e-09	1.57785e-07	2.80029e-39	2.01722e-08	4.54345e-07	L	Lost
chr1	64385173	64385547	47.4807	8.87604	26.6686	5.59598	13.8465	0	64385373	0	0	0	0	2.37881	-2.40427	-0.0254579	9.98056e-14	1.3479e-06	0.956268	1.45196e-13	4.68583e-06	0.96677	L	Lost
chr1	64462454	64463457	190.084	36.6672	46.7424	7.62369	51.5305	0	64462643	64463151	64463162	-	13.4737	2.98064	-2.38575	0.594889	3.13004e-32	2.37001e-12	0.0495373	2.40624e-31	4.44318e-11	0.073142	L	Lost
chr1	64465547	64466543	82.8391	52.491	25.8164	15.4412	25.2118	6.82975	64466046	64466088	64466099	-	16.9298	2.14117	-0.664886	1.47628	9.74898e-14	0.063872	1.69421e-06	1.41992e-13	0.0829044	4.39994e-06	L	Lost
chr1	64469059	64469639	101.999	44.9719	43.6861	17.8515	52.0536	7.88392	64469464	64469512	64469523	-	14.5439	2.93242	-1.20781	1.72462	3.9986e-24	0.000788602	6.94145e-08	1.50844e-23	0.0014356	2.06711e-07	L	Lost
chr1	64469773	64470423	164.831	44.097	57.8323	21.907	67.7434	12.316	64470081	64469890	64469901	+	13.7193	4.12176	-1.91127	2.21049	5.05026e-43	1.46853e-07	3.82781e-11	9.64381e-42	6.73218e-07	1.57939e-10	BA	Book
chr1	64623300	64623700	49.5378	7.52423	23.3214	3.66774	18.8833	0	64623525	64623573	64623584	-	3.50877	3.06939	-2.66853	0.400857	5.1831e-20	2.41464e-07	0.419086	1.33494e-19	1.04019e-06	0.495103	L	Lost
chr1	64623854	64624642	108.641	22.8609	38.7198	8.10067	47.9872	5.48144	64624440	64624550	64624561	-	8.85965	3.44727	-2.20882	1.23845	6.88824e-28	8.25117e-08	0.00100496	3.65388e-27	4.088e-07	0.00190713	L	Lost
chr1	64669835	64671043	373.898	47.8592	94.6564	10.6155	101.94	0	64670473	64670823	64670834	+	12.5614	3.5018	-2.97205	0.529755	3.06736e-41	7.09943e-18	0.0782475	5.08722e-40	6.32296e-16	0.1113	L	Lost
chr1	64736083	64737165	160.222	154.193	40.7816	46.9894	28.9001	25.6544	64736597	64736493	64736504	-	9.59649	2.44612	-0.0591468	2.38697	4.26278e-23	0.842616	2.66717e-21	1.46361e-22	0.861816	3.2591e-20	BS	Book
chr1	64778866	64780441	386.427	60.4922	113.998	9.84016	125.252	2.31366	64779453	64779478	64779489	-	6.52632	3.15989	-2.66952	0.490373	3.72799e-33	8.67321e-15	0.0960637	3.11045e-32	3.21648e-13	0.1342	L	Lost
chr1	64786731	64787377	75.3684	18.91	32.0918	8.58782	27.4062	0	64787087	64787101	64787112	+	8.21053	3.21699	-1.98707	1.22992	7.53013e-19	2.57166e-05	0.00400866	1.74404e-18	6.35433e-05	0.00704067	L	Lost
chr1	64811548	64812005	49.9662	29.2323	21.2501	9.3581	14.1418	3.2463	64811753	64811800	64811811	+	16.3333	2.33264	-0.760074	1.57257	8.30775e-14	0.0513452	5.94037e-06	1.21748e-13	0.0678729	1.45963e-05	L	Lost
chr1	64833125	64834058	90.7668	84.2381	22.4929	22.0013	13.5456	7.82217	64833463	64834053	64834064	-	9.73684	2.07633	-0.114583	1.96175	9.64994e-15	0.724873	1.36376e-12	1.53151e-14	0.75493	6.52238e-12	L	Lost
chr1	64840520	64840799	29.6205	7.62369	20.4453	4.05542	15.1947	0	64840656	64840653	64840664	+	9.84211	1.85648	-2.00158	-0.145099	1.28048e-07	0.000250217	0.77335	1.33888e-07	0.000500242	0.818785	L	Lost
chr1	64931587	64931885	58.4031	6.75395	38.81	2.99183	44.8747	0	64931762	64931781	64931792	+	2.94737	3.28983	-3.11199	0.177837	8.29961e-21	2.20361e-08	0.738377	2.30864e-20	1.29503e-07	0.788996	L	Lost
chr1	65023092	65023424	35.8011	5.78982	21.6359	3.66774	11.3427	0	65023197	65023282	65023293	-	14.3158	2.09025	-2.66213	-0.571874	2.42111e-10	3.43571e-06	0.290658	2.80873e-10	1.06625e-05	0.360961	L	Lost
chr1	65028697	65029191	80.3631	8.58782	36.2296	4.8257	39.0885	0	65028929	65028866	65028877	-	8.17544	3.30012	-3.24537	0.0547547	1.76933e-28	2.22319e-11	0.906478	9.86018e-28	3.15251e-10	0.928008	L	Lost
chr1	65045769	65046239	58.2797	32.8056	24.5736	13.6074	14.7309	4.41297	65046006	65045956	65045967	-	14.1579	2.46414	-0.831908	1.63223	5.69558e-13	0.0502218	1.14957e-05	7.81576e-13	0.066481	2.73935e-05	L	Lost
chr1	65083961	65084710	249.039	13.8956	144.703	6.17751	170.346	0	65084324	65084378	65084389	-	4.24561	4.10353	-4.18681	-0.0832836	2.29399e-37	7.78551e-19	0.847052	2.70943e-36	8.55521e-17	0.879798	L	Lost
chr1	65084998	65085600	87.4908	27.2096	34.1536	11.4802	23.3579	5.82185	65085328	65085326	65085337	-	10.2982	3.09482	-1.68965	1.40517	1.92634e-22	3.24237e-05	0.000129688	6.23072e-22	7.81582e-05	0.000274154	L	Lost
chr1	65086731	65087935	363.904	68.3047	199.697	17.5582	184.531	9.11653	65087583	65086815	65086826	+	14.4561	3.53311	-2.40388	1.12923	2.48564e-47	1.91962e-14	3.63255e-05	6.81302e-46	6.4366e-13	8.18916e-05	L	Lost
chr1	65114299	65114783	88.7762	6.07804	35.4248	3.28005	41.1617	0	65114607	65114479	65114490	+	8.12281	4.34434	-3.847	0.497343	8.13452e-39	1.22055e-12	0.357623	1.09928e-37	2.4935e-11	0.432798	L	Lost
chr1	65149839	65150466	75.7969	41.5873	27.0876	20.2618	19.3392	6.09363	65150179	65150159	65150170	-	16.7193	2.3854	-0.872642	1.51276	1.00868e-15	0.01896	3.27273e-06	1.74684e-15	0.0270096	8.26599e-06	L	Lost
chr1	65201796	65202337	39.6005	54.1209	12.5177	23.3481	6.69794	18.2503	65202094	65202164	65202175	-	14.4035	2.35374	0.458546	2.81229	1.91786e-08	0.351449	1.9277e-11	2.04973e-08	0.395127	8.21765e-11	BM	Book
chr1	65224334	65224891	63.3124	40.2355	24.5831	12.1612	13.9618	5.95771	65224744	65224683	65224694	+	8.85965	2.28057	-0.657808	1.62276	1.12963e-13	0.08412	1.03578e-06	1.63643e-13	0.106812	2.74953e-06	L	Lost
chr1	65339127	65339781	102.922	13.99	50.8469	4.43802	51.7035	0	65339427	65339381	65339392	+	5.82456	3.6694	-2.87364	0.795765	2.04953e-35	1.09076e-11	0.0487799	2.07231e-34	1.68931e-10	0.0721493	L	Lost
chr1	65693642	65694365	40.8195	86.2557	14.9937	29.1379	10.0075	24.8036	65693884	65693953	65693964	+	10.6316	2.05947	1.08031	3.13978	6.3537e-08	0.0145427	2.61442e-17	6.69566e-08	0.0211594	2.06868e-16	BM	Book
chr1	65846636	65847280	234.975	24.4167	130.838	8.9755	160.117	3.15039	65847019	65847060	65847071	-	11.2632	4.82605	-3.30036	1.52568	3.09754e-45	5.55623e-14	0.000158599	7.11638e-44	1.63948e-12	0.000331674	L	Lost
chr1	66220809	66221687	96.5283	133.151	32.0681	38.1134	34.126	27.411	66221563	66221516	66221527	+	11.6316	2.71392	0.463297	3.17721	5.29374e-18	0.20843	4.45727e-24	1.127e-17	0.24557	7.45623e-23	BS	Book
chr1	66297195	66297808	37.9055	75.6503	11.6702	25.0926	7.86699	17.6753	66297480	66297454	66297465	-	17.9123	2.50642	0.992339	3.49876	9.03301e-11	0.0229102	1.90557e-20	1.07253e-10	0.0321523	2.11175e-19	BM	Book
chr1	66312991	66313305	41.2053	8.58782	27.0591	5.30776	29.8852	0	66313184	66313200	66313211	+	13.7895	3.35863	-2.2808	1.07783	8.35195e-20	1.05331e-05	0.0325076	2.1057e-19	2.87477e-05	0.0496637	L	Lost
chr1	66571397	66572022	51.1853	51.9095	13.7035	23.3531	20.0325	11.7534	66571516	66571643	66571654	+	17.8772	2.51603	0.0190458	2.53508	4.66221e-12	0.964675	9.63841e-12	5.99299e-12	0.969481	4.23488e-11	BS	Book
chr1	66746708	66747115	81.6058	20.7439	45.4237	12.1612	30.6438	3.33207	66746833	66746917	66746928	+	0.824561	3.24853	-1.9737	1.27483	1.06727e-19	2.0215e-05	0.00228127	2.6637e-19	5.1344e-05	0.00413583	L	Lost
chr1	66807214	66808127	116.54	89.7347	52.8613	30.8774	57.3322	16.5149	66807617	66807635	66807646	-	17.8772	3.46479	-0.380169	3.08462	1.0495e-31	0.26543	5.86893e-24	7.73066e-31	0.306303	9.69574e-23	BS	Book
chr1	66958867	66959471	61.6744	2.60415	23.3404	1.15796	14.7711	0	66959207	66959173	66959184	+	4.92982	3.64929	-4.46564	-0.816346	3.53189e-26	1.19854e-09	0.260233	1.60891e-25	1.01853e-08	0.32765	L	Lost
chr1	66987305	66987788	68.7688	15.8238	41.6812	8.00629	34.9572	0	66987678	0	0	0	0	3.41447	-2.12234	1.29212	1.80979e-17	4.61471e-05	0.00631735	3.67558e-17	0.000107291	0.0107749	L	Lost
chr1	67006738	67007999	263.644	42.6458	92.438	11.8679	87.2657	0	67007614	67006942	67006953	-	8.24561	3.35261	-2.62634	0.726266	3.58275e-43	6.68284e-16	0.0121253	6.91937e-42	3.30086e-14	0.0198643	L	Lost
chr1	67010245	67010720	75.4348	8.58782	36.6865	5.11392	39.9297	0	67010449	67010355	67010366	+	9.77193	3.59035	-3.15292	0.43743	8.93474e-28	3.96913e-10	0.367608	4.6925e-27	3.92666e-09	0.443049	L	Lost
chr1	67048752	67049492	178.234	164.148	76.6538	69.9701	76.7151	65.5353	67049034	67049045	67049056	+	13.7193	3.8069	-0.12538	3.68152	8.06379e-38	0.713575	1.49988e-34	9.91767e-37	0.744512	8.82068e-33	BS	Book
chr1	67458159	67458530	60.0364	9.06988	35.8675	4.1498	49.4574	0	67458322	67458352	67458363	-	12.9298	3.83481	-2.73291	1.1019	1.27116e-20	1.20269e-06	0.0394849	3.47324e-20	4.24316e-06	0.0594455	L	Lost
chr1	67658444	67659233	55.3989	135.571	19.9931	37.9246	17.3622	29.7913	67658739	67658731	67658742	-	15.1053	3.0891	1.28873	4.37783	1.04118e-15	0.00267173	2.65887e-31	1.79972e-15	0.00441942	1.05772e-29	BM	Book
chr1	67973770	67974154	41.6338	12.1612	21.2217	7.52931	17.8711	0	67974036	67974033	67974044	+	3.57895	2.7343	-1.84398	0.890313	6.64032e-14	0.000226093	0.0544858	9.8036e-14	0.00045599	0.0797889	L	Lost
chr1	67982271	67982626	37.0818	5.59598	20.8406	2.99183	13.6378	0	67982533	67982384	67982395	+	1.84211	2.53201	-2.7215	-0.189487	3.04798e-14	1.73341e-06	0.728118	4.63736e-14	5.84341e-06	0.780269	L	Lost
chr1	68225763	68226800	63.3077	77.7673	20.8264	20.8383	14.8728	17.5521	68226225	68226242	68226253	-	11.193	2.61548	0.296146	2.91163	3.33541e-19	0.375036	5.39489e-23	7.96878e-19	0.419298	7.92489e-22	BS	Book
chr1	68333807	68334218	61.2981	17.0813	35.0105	12.8371	31.2956	7.67021	68334030	68333982	68333993	-	7.19298	3.73314	-1.87964	1.8535	1.37345e-25	2.51179e-05	1.5985e-05	5.9204e-25	6.2218e-05	3.75038e-05	L	Lost
chr1	68351046	68351685	64.503	21.4198	23.3119	5.69545	23.3012	0	68351332	68351341	68351352	-	9.07018	3.35621	-1.59184	1.76437	8.1173e-22	0.000271699	1.34965e-05	2.47657e-21	0.00053903	3.1917e-05	L	Lost
chr1	68380149	68380628	84.9104	5.59598	47.0191	4.43802	58.4093	0	68380387	68380429	68380440	-	12.4561	4.71044	-3.91725	0.793191	1.57804e-36	1.16668e-11	0.172896	1.74195e-35	1.79216e-10	0.227742	L	Lost
chr1	68826663	68827244	100.408	19.7747	61.7029	7.61861	74.2083	3.65687	68826885	68827134	68827145	+	2.29825	3.50269	-2.30443	1.19826	8.63844e-29	3.16743e-08	0.00189131	4.95233e-28	1.77507e-07	0.00346777	L	Lost
chr1	69152427	69153230	78.3108	62.1373	20.8596	17.8515	17.0844	6.59409	69152762	69152715	69152726	+	13.5789	1.92024	-0.334853	1.58539	4.20103e-08	0.439633	1.17778e-05	4.44688e-08	0.483772	2.80381e-05	L	Lost
chr1	69506428	69507100	143.285	17.5582	72.4923	5.8842	75.6354	0	69506688	69506755	69506766	-	1	3.57596	-3.01042	0.565534	7.62591e-27	5.05015e-11	0.172572	3.68356e-26	6.46661e-10	0.22744	L	Lost
chr1	71064310	71065053	78.6681	25.4752	34.9678	7.14163	37.1866	0	71064766	71064686	71064697	+	10.5789	2.80857	-1.64646	1.16211	9.32243e-20	4.33048e-05	0.00135843	2.33961e-19	0.0001013	0.00253928	L	Lost
chr1	71082035	71083064	434.907	28.462	275.409	11.3858	232.169	0	71082384	71082390	71082401	-	9.80702	4.84895	-3.92831	0.920638	4.62842e-62	6.89952e-24	0.00914474	4.07938e-60	3.54729e-21	0.0152561	L	Lost
chr1	71149534	71150606	246.846	156.907	72.0212	51.4325	73.5973	35.7339	71150267	71150238	71150249	-	16.3333	3.54267	-0.660186	2.88249	1.19231e-38	0.0425891	7.51645e-25	1.58973e-37	0.0571351	1.37496e-23	BS	Book
chr1	71164883	71165501	130.434	8.39397	71.697	2.79799	95.242	0	71165234	71164968	71164979	+	-0.263158	4.12322	-3.95229	0.170929	2.07844e-32	1.23574e-13	0.73483	1.62282e-31	3.32269e-12	0.785863	L	Lost
chr1	71268111	71268379	39.9815	5.98367	26.2306	4.8257	27.0969	0	71268254	71268268	71268279	-	5.77193	3.19112	-2.81204	0.379079	2.16225e-19	8.12298e-07	0.49647	5.25209e-19	3.01308e-06	0.571017	L	Lost
chr1	71287633	71288487	82.096	26.345	22.5024	9.16934	20.7889	5.37177	71288089	71288102	71288113	+	13.7193	3.0616	-1.66562	1.39598	5.7864e-22	4.39562e-05	0.000157077	1.79037e-21	0.000102682	0.000328714	L	Lost
chr1	71291115	71291727	51.1948	11.3858	22.4976	5.40214	14.3258	0	71291401	71291369	71291380	+	11.1228	2.58241	-2.18026	0.402155	2.48234e-15	4.4566e-06	0.361447	4.14799e-15	1.34327e-05	0.43674	L	Lost
chr1	71476289	71476850	61.2127	39.2764	27.9113	13.8012	23.3012	10.9728	71476519	71476485	71476496	+	17.3158	3.33858	-0.659064	2.67952	1.7198e-20	0.115351	2.38315e-12	4.64117e-20	0.142776	1.11342e-11	BS	Book
chr1	71533884	71534428	59.9462	23.5419	24.5784	8.78166	23.7839	3.16357	71534246	71534277	71534288	-	10.5789	3.42612	-1.34595	2.08017	1.09474e-22	0.00150698	1.68193e-07	3.61889e-22	0.00260607	4.82647e-07	L	Lost
chr1	71553955	71554911	93.6428	43.4262	21.2311	10.1335	14.3092	0	71554579	71554613	71554624	+	16.3333	2.00772	-1.13163	0.876086	4.46116e-13	0.00159032	0.0045866	6.17452e-13	0.00273888	0.00798589	L	Lost
chr1	71578165	71578568	99.9847	22.5778	58.3461	12.0617	43.3313	0	71578400	71578408	71578419	-	2.96491	3.13149	-2.14866	0.982832	7.04596e-20	1.89524e-06	0.014565	1.7888e-19	6.31555e-06	0.0235462	L	Lost
chr1	71615274	71615847	88.3287	33.3871	48.752	19.3972	49.5015	13.5323	71615617	0	0	0	0	3.6249	-1.41578	2.20912	7.77326e-27	0.000519679	3.74743e-09	3.7494e-26	0.000975886	1.26416e-08	BA	Book
chr1	71656796	71657258	50.8896	5.40214	20.8786	2.60415	22.3848	0	71656999	0	0	0	0	3.09155	-3.18734	-0.0957869	4.33749e-20	2.74685e-08	0.862807	1.1256e-19	1.56706e-07	0.892588	L	Lost
chr1	71681311	71682018	131.186	51.8202	50.7995	17.4689	51.5292	11.3175	71681857	71681851	71681862	+	17.8772	3.34668	-1.35573	1.99095	2.76261e-30	0.000158749	4.84818e-10	1.80034e-29	0.000330236	1.79111e-09	BA	Book
chr1	71692520	71693165	167.982	6.07804	66.7023	1.83387	68.8611	0	71692798	71692870	71692881	+	5.63158	3.92832	-4.76704	-0.838717	5.1815e-43	6.10952e-19	0.104804	9.8833e-42	7.00632e-17	0.145239	L	Lost
chr1	71697020	71697951	289.659	51.5167	121.687	18.6269	114.721	6.75152	71697522	71697384	71697395	-	6.70175	3.52259	-2.47866	1.04393	8.8498e-39	1.30517e-12	0.000624368	1.19214e-37	2.62682e-11	0.00121504	L	Lost
chr1	71718784	71720457	439.939	107.005	121.168	31.4589	118.021	16.5508	71719140	71719136	71719147	-	15.3333	3.66581	-2.04186	1.62396	2.64257e-60	3.27442e-13	2.58969e-11	2.00605e-58	7.78632e-12	1.08825e-10	BA	Book
chr1	71824034	71824415	51.2897	29.1328	24.1973	12.2505	20.9466	6.19601	71824292	71824266	71824277	+	9.2807	2.71059	-0.790814	1.91978	3.66069e-15	0.0601654	3.50599e-07	6.02855e-15	0.0784413	9.7173e-07	L	Lost
chr1	71968066	71969161	74.0734	153.701	18.7077	44.2909	19.6844	32.4439	71968597	71968521	71968532	-	13.7895	2.09757	1.05266	3.15023	1.15011e-13	0.00131623	2.97456e-30	1.66439e-13	0.00230296	1.03524e-28	BM	Book
chr1	72037806	72038766	69.9736	146.276	21.6596	43.1228	16.1805	33.4141	72038316	72038354	72038365	+	17.8772	1.71462	1.06163	2.77624	2.12428e-11	0.000361639	3.73751e-29	2.61912e-11	0.000701871	1.12135e-27	BM	Book
chr1	72055914	72056404	69.0834	16.4946	32.8634	5.49652	24.875	0	72056065	72056012	72056023	+	12.193	2.17928	-2.01844	0.160838	2.8128e-13	2.01878e-06	0.673791	3.94767e-13	6.67674e-06	0.73373	L	Lost
chr1	72064126	72065409	152.398	273.846	48.2713	86.8372	60.3423	80.2404	72064909	72064848	72064859	-	13.5614	2.74999	0.842624	3.59261	8.22104e-29	0.00327469	5.78486e-49	4.72101e-28	0.00533538	1.76845e-46	BM	Book
chr1	72168588	72168831	32.1155	4.53748	20.8454	3.18567	11.781	0	72168697	72168722	72168733	-	3.78947	1.8459	-2.99157	-1.14567	1.47521e-07	5.65159e-06	0.0658357	1.54006e-07	1.65581e-05	0.0949952	L	Lost
chr1	72219424	72220357	239.137	38.496	65.4358	10.9037	59.3093	0	72220062	72220035	72220046	+	5.77193	3.1978	-2.62976	0.568038	2.15226e-35	2.81285e-14	0.0632605	2.17229e-34	9.00199e-13	0.0915481	L	Lost
chr1	72248611	72249081	57.4749	30.9768	27.0876	12.1612	16.2736	4.45458	72248895	72248810	72248821	+	6.47368	2.71049	-0.914779	1.79571	8.43117e-17	0.0227132	6.32868e-07	1.60863e-16	0.0318996	1.71321e-06	L	Lost
chr1	72251711	72252550	261.71	30.1913	118.802	10.8043	93.5209	4.41222	72251935	72251992	72252003	-	12.9298	3.54253	-3.08545	0.457084	1.7383e-26	2.44822e-12	0.231662	8.11583e-26	4.57463e-11	0.295415	L	Lost
chr1	72257016	72257290	34.1725	8.39397	22.9498	5.8842	14.8989	0	72257194	72257133	72257144	+	0.578947	2.64354	-2.01966	0.623876	2.36222e-12	0.000192485	0.218475	3.10098e-12	0.000393707	0.280337	L	Lost
chr1	72257398	72257857	63.3504	17.1705	28.3351	6.75395	11.8146	0	72257516	72257466	72257477	+	5.7193	2.00933	-1.84728	0.162045	1.08844e-09	5.19447e-05	0.687622	1.22302e-09	0.000119226	0.745871	L	Lost
chr1	72258879	72259322	130.234	22.1901	94.8808	13.7961	108.154	5.8894	72259026	0	0	0	0	4.08073	-2.54463	1.53611	8.62246e-30	3.1022e-08	0.000253369	5.38931e-29	1.7437e-07	0.00051752	L	Lost
chr1	72260212	72261234	567.236	105.469	236.989	31.3594	167.245	17.8482	72260700	72260660	72260671	-	17.0877	4.19535	-2.43253	1.76282	6.27105e-46	3.48943e-11	1.4757e-08	1.53976e-44	4.68449e-10	4.7094e-08	BA	Book
chr1	72275514	72276250	454.029	81.6187	192.913	24.1234	163.309	16.2777	72275763	72276071	72276082	-	17.5439	4.91904	-2.47095	2.44808	4.34617e-49	1.24232e-09	3.82585e-12	1.3493e-47	1.05126e-08	1.74892e-11	BA	Book
chr1	72289167	72289765	65.7979	20.0731	27.0639	6.75395	21.7846	0	72289497	72289376	72289387	+	6.08772	2.30562	-1.7457	0.559915	8.29853e-12	0.000121888	0.163219	1.04842e-11	0.000259459	0.216348	L	Lost
chr1	72292946	72293219	35.8153	18.4229	21.6407	10.511	12.8832	7.87649	72293115	0	0	0	0	2.36589	-0.91444	1.45145	9.67606e-10	0.0609938	0.000818066	1.08945e-09	0.0794329	0.00156984	L	Lost
chr1	72359346	72360013	121.949	27.6917	65.7837	11.192	63.7327	2.29186	72359778	72359726	72359737	+	12.5439	2.84995	-2.14181	0.708143	1.88284e-23	2.38206e-08	0.038825	6.67192e-23	1.38266e-07	0.0585169	L	Lost
chr1	72424512	72424979	111.693	13.6023	70.8543	5.11392	62.3984	0	72424879	72424854	72424865	-	9.70175	2.84358	-3.00801	-0.164433	2.15205e-20	3.97029e-11	0.69173	5.75184e-20	5.24596e-10	0.749441	L	Lost
chr1	72489111	72489567	47.4855	29.2323	20.8501	12.3499	15.1947	2.63934	72489259	72489266	72489277	+	16.3333	2.13674	-0.685218	1.45152	4.49489e-13	0.0649671	1.1073e-05	6.21917e-13	0.0842259	2.64327e-05	L	Lost
chr1	72536661	72537180	53.723	15.9182	23.3166	5.59598	14.3092	0	72537066	72537038	72537049	+	4.42105	1.87531	-1.7326	0.142702	2.95174e-10	4.61283e-05	0.708489	3.40755e-10	0.000107254	0.763745	L	Lost
chr1	72615869	72616557	69.9926	17.8465	21.6596	4.24418	18.212	0	72616438	72615963	72615974	+	5.33333	2.47813	-1.93744	0.540683	4.73373e-17	2.46896e-06	0.147933	9.25499e-17	7.97995e-06	0.198098	L	Lost
chr1	72759184	72759618	90.362	31.4589	45.3953	13.513	41.519	4.98623	72759364	72759345	72759356	-	18.4737	2.72852	-1.54574	1.18278	5.08708e-22	2.58519e-05	0.000336548	1.58367e-21	6.38358e-05	0.000677348	L	Lost
chr1	72761088	72761741	62.446	13.0258	25.8164	3.95596	15.0427	0	72761331	72761284	72761295	-	4.96491	2.13654	-2.26675	-0.130215	2.25441e-10	3.30813e-06	0.765689	2.61991e-10	1.03062e-05	0.812399	L	Lost
chr1	72773134	72773364	32.106	5.40214	24.1878	3.76211	13.9187	0	72773279	72773169	72773180	-	5.03509	2.78093	-2.52401	0.256912	1.13987e-13	2.12772e-05	0.651978	1.65028e-13	5.36926e-05	0.714206	L	Lost
chr1	72779246	72779804	119.573	28.944	58.7699	11.5796	64.5282	2.19098	72779399	72779569	72779580	+	10.4737	3.11423	-2.03918	1.07505	3.76226e-27	7.64129e-08	0.00166541	1.87109e-26	3.81873e-07	0.00307601	L	Lost
chr1	72787882	72788411	94.4618	24.6055	40.7911	10.034	36.916	0	72788205	72788182	72788193	-	10.5965	2.4557	-1.95019	0.50551	1.98268e-12	2.4849e-05	0.208294	2.61702e-12	6.16329e-05	0.268778	L	Lost
chr1	72825718	72826038	47.9757	15.0535	22.5451	5.98367	15.8386	0	72825906	72825941	72825952	+	10.1053	2.16155	-1.69618	0.465379	3.3152e-11	0.000190335	0.256495	4.04032e-11	0.000389709	0.323448	L	Lost
chr1	72836807	72837667	118.254	19.4966	26.2591	5.78982	13.6911	0	72837032	72837170	72837181	+	5.24561	2.08833	-2.66037	-0.572047	2.07822e-12	5.95825e-10	0.132219	2.73971e-12	5.59439e-09	0.179183	L	Lost
chr1	72838818	72839330	50.3852	10.6104	20.0026	4.24418	11.9923	0	72838981	72838980	72838991	+	6.70175	2.11108	-2.18637	-0.0752896	1.8335e-12	1.90713e-06	0.858842	2.42463e-12	6.34706e-06	0.889457	L	Lost
chr1	72839425	72840609	766.133	40.3298	401.582	7.52423	179.297	3.92192	72839963	72839881	72839892	-	6.49123	5.13945	-4.24482	0.894631	9.70848e-94	5.38931e-37	0.00301241	1.13599e-90	9.14378e-33	0.00537943	L	Lost
chr1	72843932	72844358	63.3883	9.3581	28.7731	4.1498	20.6014	0	72844056	72844187	72844198	+	2.42105	2.35911	-2.7383	-0.379194	1.38452e-12	9.76754e-08	0.420595	1.84441e-12	4.73218e-07	0.49654	L	Lost
chr1	72852819	72854186	258.183	66.9529	50.8232	10.9981	37.0724	3.37757	72853160	72853838	72853849	+	6.36842	2.70915	-1.93741	0.771739	4.57726e-24	1.8855e-08	0.00852539	1.71662e-23	1.1298e-07	0.0142832	L	Lost
chr1	72857405	72858033	114.912	13.8956	52.885	4.8257	58.9489	0	72857839	72857710	72857721	+	12.8596	3.19529	-3.07463	0.12066	1.93294e-28	1.30298e-12	0.764784	1.07297e-27	2.62399e-11	0.811539	L	Lost
chr1	72859697	72859988	63.7172	9.55194	42.9145	5.40214	27.2562	0	72859815	0	0	0	0	2.70107	-2.73631	-0.0352365	3.44621e-18	1.67593e-08	0.938171	7.4746e-18	1.01844e-07	0.952686	L	Lost
chr1	72868473	72870928	632.239	361.145	155.855	70.8246	116.653	51.0085	72870587	72870562	72870573	+	18.1053	3.18977	-0.808037	2.38174	1.73024e-42	0.00485856	1.21817e-23	3.17363e-41	0.0076778	1.93794e-22	BA	Book
chr1	72872255	72873665	254.031	89.9336	69.1594	25.3758	63.7078	14.3169	72872687	72872660	72872671	-	17.9123	2.81433	-1.50556	1.30876	1.14102e-25	8.558e-06	4.98291e-06	4.95562e-25	2.39524e-05	1.23501e-05	BA	Book
chr1	72874347	72875071	280.408	56.8245	115.826	17.5582	89.8558	8.03447	72874760	72874743	72874754	+	16.5263	3.34693	-2.29386	1.05307	8.63556e-37	1.56651e-11	0.000372939	9.7417e-36	2.31316e-10	0.000746031	L	Lost
chr1	72900181	72901667	246.865	161.429	50.752	44.1965	54.7998	30.4421	72900604	72901396	72901407	+	14.4561	2.38832	-0.615623	1.7727	2.93496e-20	0.0545493	2.89224e-11	7.75157e-20	0.071745	1.20865e-10	BS	Book
chr1	72991543	72992265	179.548	45.5331	55.8274	11.192	43.3368	4.15106	72992099	72992104	72992115	+	0.754386	3.1566	-1.96118	1.19541	4.60156e-28	1.00647e-07	0.000204909	2.47731e-27	4.84844e-07	0.000423199	L	Lost
chr1	73006822	73007456	124.954	15.9182	45.7763	5.11392	44.4247	0	73007065	73007384	73007395	-	2.82456	2.74564	-2.94908	-0.203439	9.16396e-26	1.38364e-13	0.579257	4.01395e-25	3.65663e-12	0.649632	L	Lost
chr1	73009652	73010063	50.3758	13.4084	21.2122	5.59598	12.6696	0	73009814	73009762	73009773	-	13.7193	2.27723	-1.86693	0.410298	3.46453e-12	5.2976e-05	0.327607	4.49688e-12	0.000121396	0.40066	L	Lost
chr1	73106983	73107311	44.962	12.9264	22.4834	6.84833	13.8465	0	73107160	73107170	73107181	+	15.1053	2.35193	-1.75637	0.595564	1.03019e-13	8.54915e-05	0.148108	1.49704e-13	0.000187693	0.198309	L	Lost
chr1	73131463	73131791	46.2475	6.36627	28.7636	3.28005	18.896	0	73131655	73131652	73131663	+	5.54386	2.34563	-2.7952	-0.449565	2.03309e-12	4.40784e-07	0.386497	2.6822e-12	1.76257e-06	0.462365	L	Lost
chr1	73172144	73172941	99.5277	42.3576	29.9921	8.2996	20.9063	0	73172622	73172618	73172629	-	18.1053	1.93549	-1.23481	0.700672	2.82991e-14	0.000220015	0.015745	4.31796e-14	0.000444815	0.0253188	L	Lost
chr1	73282095	73282579	62.4839	57.7988	25.8306	21.9019	18.0321	15.5317	73282350	73282429	73282440	-	17.8772	2.30389	-0.12073	2.18316	5.68075e-16	0.721879	1.77399e-13	1.00655e-15	0.752065	9.26842e-13	BS	Book
chr1	73435921	73436968	123.739	27.5973	40.01	5.78982	20.6482	0	73436758	73436162	73436173	-	15.1754	2.25248	-2.18172	0.0707587	6.3107e-20	4.0572e-10	0.820492	1.60924e-19	4.00445e-09	0.857303	L	Lost
chr1	73547241	73547763	65.3742	11.9673	22.0881	4.1498	18.8296	0	73547451	73547619	73547630	+	11.1228	2.68705	-2.50813	0.178915	2.01489e-17	9.68301e-08	0.681258	4.07361e-17	4.69736e-07	0.740272	L	Lost
chr1	73550121	73550585	52.9324	8.29451	22.9166	3.95596	14.9233	0	73550411	73550545	73550556	-	6.19298	2.45546	-2.59187	-0.136405	1.06266e-12	9.03069e-07	0.779383	1.42764e-12	3.30856e-06	0.823683	L	Lost
chr1	73689365	73689893	103.209	18.2392	54.5135	6.46573	57.7889	0	73689551	73689624	73689635	-	12.9298	2.88831	-2.53501	0.353301	1.63396e-20	5.97146e-09	0.369554	4.42146e-20	4.16077e-08	0.445047	L	Lost
chr1	73718769	73719254	68.3214	27.6968	29.1494	12.7376	31.0374	3.06058	73719080	73719125	73719136	+	12.2632	2.72673	-1.3316	1.39513	2.77584e-17	0.00119152	0.000147596	5.54074e-17	0.0020985	0.000309828	L	Lost
chr1	73829465	73829840	51.7514	10.5161	28.8158	4.63186	41.2039	0	73829735	73829701	73829712	-	1.01754	2.81557	-2.28261	0.53296	3.12303e-16	4.1778e-06	0.248509	5.65555e-16	1.26814e-05	0.314487	L	Lost
chr1	73952142	73952869	147.475	43.7094	64.1504	18.0454	47.6001	4.71767	73952485	73952484	73952495	-	6.50877	2.70248	-1.75948	0.943005	2.96378e-25	2.21009e-07	0.00159369	1.23946e-24	9.61719e-07	0.00295124	L	Lost
chr1	73978383	73978680	38.2723	19.2033	23.3071	10.8094	14.5499	0	73978501	73978497	73978508	-	13.4737	2.10032	-1.02038	1.07994	1.49399e-09	0.0238772	0.00711202	1.6691e-09	0.0334265	0.0120431	L	Lost
chr1	73979263	73980310	144.928	32.9051	47.8997	6.85341	35.8773	0	73979625	73979572	73979583	-	15.1754	2.35631	-2.15755	0.19876	5.11531e-22	1.87132e-10	0.508239	1.59187e-21	2.02357e-09	0.582323	L	Lost
chr1	73993818	73994228	52.4992	11.5796	22.0976	5.59598	12.8382	0	73994032	73994009	73994020	+	15.1754	1.72134	-2.20567	-0.484339	4.06968e-07	1.21363e-05	0.282403	4.20436e-07	3.26092e-05	0.351791	L	Lost
chr1	74047435	74047812	54.5325	40.0416	27.0449	21.0372	20.2986	8.58014	74047551	74047522	74047533	+	16.1579	2.32609	-0.44719	1.8789	7.54714e-15	0.21915	5.11094e-09	1.20886e-14	0.256969	1.70614e-08	L	Lost
chr1	74066986	74067223	31.2159	7.91191	21.2359	4.43802	11.9878	0	74067121	0	0	0	0	2.02559	-1.98536	0.0402299	1.44196e-09	0.000132826	0.933695	1.61199e-09	0.000280543	0.949562	L	Lost
chr1	74077554	74078529	178.653	94.6598	67.9119	28.5614	53.7422	12.8212	74077844	74077840	74077851	+	13.2456	2.68896	-0.922661	1.7663	8.00106e-25	0.00430598	1.5539e-10	3.21568e-24	0.00686758	6.03646e-10	BA	Book
chr1	74138876	74139308	87.8291	18.91	44.1193	9.55194	30.1333	0	74139057	74139079	74139090	+	3	2.2399	-2.20781	0.0320868	4.6123e-11	2.42868e-06	0.937687	5.57163e-11	7.86529e-06	0.952354	L	Lost
chr1	74139590	74140363	134.029	102.378	62.4127	35.3205	55.0938	23.5086	74140052	74140040	74140051	-	17.0877	2.61286	-0.392457	2.2204	3.76388e-17	0.29906	3.24002e-12	7.42729e-17	0.341202	1.4942e-11	BS	Book
chr1	74141287	74142222	185.343	39.4652	49.1852	9.3581	37.379	0	74141597	74141631	74141642	+	14.1579	2.68231	-2.23885	0.443456	1.42205e-17	5.48377e-08	0.208913	2.9162e-17	2.85838e-07	0.269504	L	Lost
chr1	74157878	74158662	282.075	23.4475	130.876	11.9622	118.598	4.98226	74158048	74158351	74158362	+	15.3333	3.63575	-3.60058	0.0351666	8.35068e-41	1.44189e-20	0.919763	1.33285e-39	2.89513e-18	0.938515	L	Lost
chr1	74170481	74170874	49.1472	40.6181	29.9968	18.428	20.0154	10.4108	74170734	74170714	74170725	+	8.15789	2.26333	-0.269432	1.9939	7.85478e-12	0.500253	1.00339e-08	9.94278e-12	0.542872	3.25631e-08	BS	Book
chr1	74226273	74226561	43.8094	4.63186	26.2923	2.50977	19.5296	0	74226394	0	0	0	0	2.10656	-3.27395	-1.16739	1.84088e-09	3.13621e-07	0.0527299	2.04587e-09	1.30867e-06	0.077418	L	Lost
chr1	74244161	74245071	91.5811	78.4483	22.4976	15.5356	12.6305	6.59994	74244761	74244744	74244755	+	15.1404	1.84495	-0.231057	1.6139	2.4508e-13	0.456519	8.85382e-10	3.45347e-13	0.500277	3.19342e-09	L	Lost
chr1	74252215	74252519	36.2438	34.5502	17.9029	20.0731	7.85298	11.2145	74252308	74252328	74252339	+	10.5439	2.28873	-0.0948028	2.19393	2.52234e-09	0.83612	3.65636e-08	2.78688e-09	0.855946	1.1216e-07	BM	Book
chr1	74303465	74304288	195.446	18.428	66.7071	6.75395	58.202	0	74303619	74303637	74303648	-	6.59649	3.17184	-3.40049	-0.228653	2.18148e-29	1.67521e-16	0.539776	1.32186e-28	9.75041e-15	0.612518	L	Lost
chr1	74331400	74332424	345.707	307.129	98.304	88.4823	82.3811	60.2226	74331824	74332043	74332054	-	13.8947	3.4496	-0.172073	3.27753	2.49223e-38	0.590789	4.00544e-34	3.218e-37	0.629467	2.25775e-32	BS	Book
chr1	74353976	74355221	139.395	39.3708	29.1067	8.68728	18.7581	0	74355108	74354512	74354523	-	5.82456	1.9346	-1.83999	0.0946087	1.47519e-12	5.05125e-07	0.763793	1.96089e-12	1.98891e-06	0.810767	L	Lost
chr1	74355625	74356901	244.571	81.4249	70.693	22.6722	89.8533	20.9969	74356220	74356235	74356246	+	17.8772	3.13519	-1.58042	1.55477	1.17784e-25	2.40548e-05	9.68468e-07	5.10767e-25	5.98864e-05	2.5777e-06	BA	Book
chr1	74381311	74382071	82.3537	20.6444	22.4929	8.00629	12.9507	0	74381468	74381782	74381793	-	3.61404	1.98032	-1.97286	0.00745933	1.66137e-09	1.18275e-05	0.984839	1.85067e-09	3.18652e-05	0.988393	L	Lost
chr1	74425675	74426061	44.9051	9.93962	20.8122	5.30776	16.4275	0	74425816	74425691	74425702	+	10.7193	1.99922	-2.21243	-0.213206	7.36219e-09	2.02115e-05	0.65109	7.97998e-09	5.13389e-05	0.713474	L	Lost
chr1	74433080	74433783	165.654	79.313	72.4307	25.1819	86.697	17.4831	74433363	74433389	74433400	+	9.24561	3.05985	-1.06389	1.99596	6.76937e-16	0.0228216	3.50289e-07	1.19006e-15	0.0320373	9.7095e-07	BA	Book
chr1	74443095	74443807	156.574	110.096	40.848	31.8415	17.0143	6.34186	74443365	74443486	74443497	-	11.0351	1.32466	-0.512709	0.811954	1.91014e-08	0.0852096	0.00100389	2.04154e-08	0.108078	0.00190553	L	Lost
chr1	74474085	74474865	110.431	101.901	35.4058	32.8056	28.0287	18.8519	74474497	74474501	74474512	+	18.1053	2.39076	-0.123695	2.26706	7.57904e-17	0.721018	1.14629e-14	1.45258e-16	0.75133	6.77768e-14	BS	Book
chr1	74514784	74515812	87.5429	47.0838	21.2596	10.7099	17.3622	4.64491	74514910	74515587	74515598	+	13.7193	3.36181	-0.892892	2.46891	2.13544e-24	0.0226419	2.47102e-12	8.26343e-24	0.0318113	1.15193e-11	L	Lost
chr1	74549449	74549794	54.504	7.42985	32.8823	4.1498	36.1801	0	74549651	74549785	74549796	+	6.89474	3.61853	-2.89125	0.727287	7.78319e-22	1.82743e-07	0.174445	2.38042e-21	8.13248e-07	0.229519	L	Lost
chr1	74552571	74552975	59.5367	76.3161	35.839	41.4878	21.6782	31.1623	74552716	74552675	74552686	-	2.96491	2.23597	0.360382	2.59635	2.38387e-09	0.420583	5.07368e-12	2.63681e-09	0.465026	2.29096e-11	BS	Book
chr1	74558058	74558475	43.7098	10.8043	23.7356	4.43802	23.1702	0	74558243	74558169	74558180	-	13.7193	3.11207	-1.97582	1.13625	2.24912e-19	3.02954e-05	0.0123101	5.45373e-19	7.35082e-05	0.0201456	L	Lost
chr1	74634472	74635157	66.6644	76.2268	32.1155	21.226	29.0424	14.4384	74634720	74634725	74634736	-	10.2982	1.92355	0.191531	2.11508	4.0054e-06	0.707063	4.89501e-07	4.08081e-06	0.738648	1.34008e-06	BS	Book
chr1	74802786	74803352	60.8222	47.7597	23.3451	16.3059	16.9601	9.12582	74803021	74803015	74803026	+	13.7193	2.71706	-0.348089	2.36897	2.91879e-17	0.360976	2.34545e-12	5.81479e-17	0.405005	1.09671e-11	L	Lost
chr1	74825065	74826313	392.207	68.7817	100.356	17.1705	65.7562	9.30056	74825845	74825876	74825887	-	14.807	3.36773	-2.50056	0.867174	1.83146e-26	5.55242e-10	0.0106078	8.53901e-26	5.24527e-09	0.0175296	L	Lost
chr1	74827955	74828797	85.3104	31.2651	22.5024	9.16426	13.8689	4.73636	74828261	74828220	74828231	+	9.33333	2.3305	-1.46391	0.866591	4.42336e-13	0.000464186	0.0170442	6.12245e-13	0.000880399	0.027267	L	Lost
chr1	74837546	74838014	65.3599	16.2064	27.8686	7.52423	25.0361	0	74837808	74837780	74837791	+	9.49123	2.45379	-1.98119	0.472602	8.29412e-13	2.47951e-05	0.259998	1.12353e-12	6.15128e-05	0.327402	L	Lost
chr1	74851997	74855030	320.548	218.154	44.5478	22.8711	40.0725	13.2455	74853108	74853094	74853105	+	12.4561	2.00981	-0.555423	1.45439	2.43519e-11	0.138195	1.94792e-06	2.99028e-11	0.168682	5.03034e-06	BS	Book
chr1	74858515	74859589	86.229	133.26	17.9314	24.2229	12.9409	17.4077	74859277	74859234	74859245	+	17.8772	2.17321	0.621667	2.79488	1.74319e-15	0.052656	6.64958e-25	2.9502e-15	0.0694594	1.22564e-23	BS	Book
chr1	74871185	74872073	421.307	69.0851	211.772	19.591	166.404	9.13317	74871690	74871640	74871651	+	14.807	3.66644	-2.61081	1.05563	1.03112e-43	1.32309e-14	0.000298821	2.09015e-42	4.66213e-13	0.000605619	L	Lost
chr1	74897886	74898724	142.856	51.328	41.6338	14.6659	33.5584	4.90992	74898402	74898409	74898420	+	16.7193	2.52232	-1.47211	1.05021	2.95512e-23	6.88114e-06	0.000235486	1.02794e-22	1.97261e-05	0.000482795	L	Lost
chr1	74975660	74976248	144.532	22.0957	82.896	10.034	76.7151	0	74975826	74976095	74976106	-	6.89474	3.08633	-2.71461	0.371723	1.15669e-26	1.45417e-11	0.304993	5.49028e-26	2.16708e-10	0.376572	L	Lost
chr1	75003956	75004618	72.0306	25.8578	23.7546	10.2278	16.7271	0	75004367	75004575	75004586	+	17.8772	2.51244	-1.47736	1.03507	7.62108e-18	0.000120145	0.00270868	1.60009e-17	0.000256118	0.00486805	L	Lost
chr1	75036431	75038028	188.242	297.691	43.3477	71.9927	41.2166	72.1569	75037223	75037188	75037199	+	17.8772	2.81636	0.658156	3.47451	2.0935e-25	0.0401992	4.52167e-38	8.88652e-25	0.0541753	4.08606e-36	BS	Book
chr1	75080363	75080654	35.8011	8.87604	21.6407	5.11392	16.4202	0	75080433	75080408	75080419	+	9.73684	2.5693	-1.99898	0.570314	4.94604e-11	0.000305489	0.264004	5.96235e-11	0.00060031	0.331708	L	Lost
chr1	75080790	75081432	72.0401	23.7357	27.8829	7.42985	23.253	0	75081026	75081047	75081058	+	9.92982	2.12503	-1.60513	0.519902	8.84489e-14	3.57188e-05	0.132256	1.29351e-13	8.53314e-05	0.179227	L	Lost
chr1	75120661	75121705	113.184	145.605	32.4396	39.2713	26.6721	24.852	75121431	75120741	75120752	+	13.386	1.80225	0.360807	2.16306	6.23234e-09	0.340184	3.60445e-12	6.77566e-09	0.383695	1.65261e-11	BS	Book
chr1	75177012	75177347	59.1841	17.27	25.0211	8.58782	16.4877	0	75177226	75177020	75177031	+	0.157895	2.54542	-1.7678	0.777613	1.8421e-17	1.78632e-05	0.0398218	3.73739e-17	4.59415e-05	0.0599048	L	Lost
chr1	75203073	75203672	74.445	16.5941	37.0154	5.01446	50.0448	0	75203339	75203390	75203401	-	2.01754	2.74046	-2.15374	0.586713	2.24428e-14	9.44597e-06	0.176236	3.45845e-14	2.61316e-05	0.231657	L	Lost
chr1	75208416	75208825	47.4807	29.7143	22.0834	12.3499	12.1308	0	75208708	75208714	75208725	+	14.3158	1.94361	-0.661048	1.28256	1.79683e-10	0.0869253	0.000147589	2.09871e-10	0.110053	0.000309828	L	Lost
chr1	75223948	75224653	189.752	32.4281	65.3267	11.4853	55.1106	2.77044	75224428	75224118	75224129	-	15.3333	3.62026	-2.58103	1.03923	4.86522e-28	1.63947e-09	0.00578451	2.61428e-27	1.33763e-08	0.00992695	L	Lost
chr1	75302602	75302898	34.62	6.27189	20.4359	4.43802	13.7992	0	75302722	75302811	75302822	-	4.7193	2.32945	-2.47787	-0.148422	1.34454e-09	3.79227e-05	0.790664	1.5053e-09	9.0026e-05	0.832985	L	Lost
chr1	75325231	75325752	45.419	19.0095	24.9926	8.10575	16.9429	0	75325475	75325450	75325461	+	13.7193	2.74797	-1.27648	1.4715	9.89919e-18	0.00191966	0.000122775	2.05701e-17	0.0032613	0.000260382	L	Lost
chr1	75340150	75341422	136.172	66.481	25.3926	16.6936	10.3243	4.21182	75340527	75340551	75340562	+	16.9298	1.74737	-1.03833	0.709037	9.03511e-11	0.0026257	0.0146213	1.07274e-10	0.00434941	0.0236293	L	Lost
chr1	75342245	75342536	41.648	12.9264	24.1736	7.61861	10.9886	0	75342350	75342279	75342290	+	9.31579	1.7114	-1.64977	0.0616341	4.3581e-07	0.000604731	0.885492	4.49986e-07	0.001122	0.910866	L	Lost
chr1	75345875	75346795	151.151	141.759	48.733	40.6231	41.8897	21.8019	75346183	75346242	75346253	+	12.5614	2.42898	-0.097564	2.33141	8.90706e-13	0.814403	1.21364e-11	1.20339e-12	0.835984	5.27506e-11	BS	Book
chr1	75367530	75368301	140.414	70.5415	43.7572	21.4249	34.8055	11.7777	75367985	75367918	75367929	+	15.1754	3.0092	-1.00345	2.00575	9.24985e-21	0.0111375	3.14302e-09	2.56078e-20	0.0165411	1.06887e-08	BA	Book
chr1	75384207	75384623	50.7141	22.7716	25.7784	10.4217	25.3912	0	75384423	75384406	75384417	-	10.1579	2.67488	-1.15995	1.51493	2.25447e-08	0.0525939	0.00322058	2.4041e-08	0.0693857	0.00572768	L	Lost
chr1	75410051	75410610	114.955	35.0272	44.1715	13.2197	28.9286	7.38259	75410464	75410441	75410452	+	8.17544	2.67059	-1.72392	0.94667	1.46109e-15	6.42616e-05	0.011043	2.49091e-15	0.000144458	0.0182	L	Lost
chr1	75443894	75444507	136.995	15.7244	67.9024	5.69036	48.6768	0	75444169	75444076	75444087	-	6.24561	2.85541	-3.09746	-0.242056	7.41155e-16	5.01775e-10	0.581994	1.29778e-15	4.80574e-09	0.652378	L	Lost
chr1	75478739	75479268	62.0127	47.094	24.1546	13.995	11.3279	4.71767	75478990	75478906	75478917	-	10.6491	1.91079	-0.413206	1.49758	7.90336e-08	0.349359	5.66924e-05	8.30937e-08	0.392908	0.00012513	L	Lost
chr1	75484598	75484965	43.3572	24.6999	20.8501	10.5161	10.9605	0	75484733	75484946	75484957	-	7.03509	1.93794	-0.809765	1.12817	2.17049e-09	0.051481	0.00197288	2.40533e-09	0.0680418	0.00360893	L	Lost
chr1	75496335	75496951	114.107	39.659	34.5583	11.2914	25.6892	4.41815	75496676	75496470	75496481	-	12.9298	2.68037	-1.5384	1.14197	3.8934e-25	4.63826e-06	0.000136929	1.61076e-24	1.39074e-05	0.000288811	L	Lost
chr1	75508052	75508839	105.351	20.6444	31.2301	6.75395	27.3747	0	75508732	75508147	75508158	+	4.49123	1.89248	-2.32575	-0.433273	2.32034e-10	3.78809e-08	0.242538	2.69432e-10	2.06958e-07	0.307698	L	Lost
chr1	75513466	75513970	64.903	30.7728	24.1309	10.8043	18.2429	2.63934	75513734	75513750	75513761	+	13.7193	2.16315	-1.05472	1.10842	1.31894e-10	0.0141754	0.00286328	1.55224e-10	0.0206665	0.00512906	L	Lost
chr1	75514628	75515154	76.6348	13.0258	34.5631	6.75395	15.2617	0	75514842	0	0	0	0	2.46873	-2.56189	-0.0931648	4.54702e-13	2.00454e-07	0.833485	6.28745e-13	8.81318e-07	0.868605	L	Lost
chr1	75542122	75542849	205.641	196.148	79.9109	76.515	96.1472	50.8235	75542617	75542604	75542615	+	16.1579	3.16273	-0.0675245	3.09521	2.60265e-20	0.870461	3.12318e-19	6.90074e-20	0.886902	3.01591e-18	BS	Book
chr1	75543252	75544195	82.3916	70.9241	24.5499	14.5715	19.3392	5.21896	75543548	75544192	75544203	-	13.7895	1.58981	-0.222328	1.36748	7.24957e-06	0.613589	0.000167671	7.36548e-06	0.650897	0.000349484	L	Lost
chr1	75556409	75556881	58.2702	41.8755	21.6454	12.9315	11.9186	3.00014	75556721	75556758	75556769	+	4.49123	1.54124	-0.479114	1.06213	9.33666e-06	0.273935	0.00379761	9.47289e-06	0.315056	0.00669425	L	Lost
chr1	75557562	75558089	92.4001	57.128	46.2048	27.6968	46.4299	15.6279	75557699	75557677	75557688	+	14.0351	2.79431	-0.709198	2.08511	2.68889e-21	0.0474259	3.23359e-11	7.82591e-21	0.0630679	1.34435e-10	BS	Book
chr1	75562269	75563287	120.311	137.4	30.7921	36.861	31.7156	20.7276	75562572	75562606	75562617	-	18.1053	2.7956	0.18925	2.98485	3.86978e-25	0.549519	7.10169e-28	1.60138e-24	0.590318	1.86086e-26	BS	Book
chr1	75585399	75585898	151.769	14.6659	81.3244	8.58782	66.9763	0	75585633	0	0	0	0	3.08256	-3.37296	-0.290401	9.7552e-19	1.33152e-11	0.512976	2.23257e-18	2.00366e-10	0.58676	L	Lost
chr1	75598006	75598689	286.951	39.3657	134.948	14.0894	116.286	4.67498	75598521	75598566	75598577	+	14.3158	3.96779	-2.86549	1.1023	7.0243e-37	1.2638e-12	0.00183191	7.99148e-36	2.5664e-11	0.00336613	L	Lost
chr1	75659291	75659816	62.4887	19.7798	23.3071	6.94779	18.7635	0	75659635	75659526	75659537	+	4.7193	1.73877	-1.66344	0.0753255	4.70465e-11	1.19528e-05	0.824931	5.67942e-11	3.21569e-05	0.861172	L	Lost
chr1	75700786	75701668	83.2866	15.7244	24.5831	3.95596	15.2053	0	75701438	75700970	75700981	+	7.68421	2.13599	-2.37196	-0.23597	7.15464e-14	1.83125e-08	0.534936	1.05359e-13	1.10138e-07	0.607882	L	Lost
chr1	75729970	75730561	53.704	17.7572	21.6501	6.46573	23.2791	0	75730191	75730256	75730267	+	18.1053	2.81269	-1.63797	1.17472	1.50478e-17	0.000171736	0.00345297	3.07861e-17	0.000354839	0.00611724	L	Lost
chr1	75788238	75789032	96.5853	79.7057	28.6971	20.5551	31.8327	11.1784	75788826	75788771	75788782	-	15.1404	2.55188	-0.286148	2.26573	1.09411e-18	0.410773	3.93884e-14	2.49355e-18	0.455247	2.20156e-13	BS	Book
chr1	75800976	75801580	197.855	11.192	108.712	3.66774	109.779	0	75801262	75801299	75801310	-	6.59649	4.70356	-4.13849	0.565073	4.34402e-51	5.19748e-19	0.20497	1.55491e-49	6.06069e-17	0.264892	L	Lost
chr1	75842744	75843241	79.1156	10.2278	38.7198	3.47389	30.8465	0	75842923	75842905	75842916	-	8.92982	2.78764	-2.96147	-0.173829	1.79953e-20	3.93844e-10	0.694342	4.84978e-20	3.90313e-09	0.75156	L	Lost
chr1	75859335	75859908	81.2296	14.6659	39.5958	5.78982	45.2487	0	75859569	75859575	75859586	-	7.91228	3.57421	-2.47172	1.10249	4.74795e-30	9.24901e-09	0.00725909	3.02843e-29	6.05882e-08	0.0122744	L	Lost
chr1	75869117	75869643	45.0285	36.9605	20.0074	13.6074	14.7383	4.41297	75869270	75869218	75869229	-	17.3158	2.41733	-0.304596	2.11274	9.61628e-12	0.474862	1.52722e-08	1.2107e-11	0.517985	4.86695e-08	L	Lost
chr1	75884992	75885778	144.57	17.0762	52.0849	5.11392	49.5258	0	75885308	75885312	75885323	-	7.35088	2.84642	-3.06422	-0.2178	2.43205e-22	7.33401e-13	0.571742	7.79142e-22	1.58715e-11	0.642415	L	Lost
chr1	75915497	75916079	62.0317	27.1153	24.5594	9.45756	18.0918	2.46397	75915837	75915822	75915833	-	13.2982	2.37292	-1.21089	1.16203	1.60887e-14	0.002425	0.00105643	2.50533e-14	0.0040444	0.00199977	L	Lost
chr1	75933299	75933593	37.0486	12.0617	24.5641	6.46573	14.5499	0	75933455	75933428	75933439	+	12.9298	2.02248	-1.6364	0.386074	5.08848e-08	0.00153416	0.403795	5.37436e-08	0.0026493	0.479778	L	Lost
chr1	76017867	76018218	27.0923	37.7359	12.0939	22.2003	4.39505	15.4614	76018038	76017976	76017987	-	15.3333	1.70463	0.446704	2.15134	2.40049e-06	0.294182	2.75641e-09	2.45142e-06	0.336144	9.43159e-09	BM	Book
chr1	76024922	76026348	264.929	57.2173	52.047	10.3273	41.3009	3.16915	76025872	76025582	76025593	-	11.5439	3.16519	-2.21354	0.951649	3.68057e-26	7.63867e-09	0.0036495	1.67439e-25	5.147e-08	0.00644623	L	Lost
chr1	76032605	76033307	86.6243	22.9655	34.9963	9.74578	26.4663	0	76033079	76033029	76033040	-	12.9123	2.60582	-1.92986	0.675962	6.67516e-18	2.29655e-06	0.0644292	1.40855e-17	7.48404e-06	0.0931083	L	Lost
chr1	76080132	76080763	57.4512	67.3558	26.2449	28.5665	20.8034	17.4495	76080460	76080408	76080419	-	18.4737	2.03167	0.216225	2.2479	4.12879e-12	0.534455	4.42596e-14	5.32749e-12	0.575973	2.46166e-13	BS	Book
chr1	76388892	76390115	100.423	93.0096	22.9403	23.0548	17.821	17.1543	76389195	76389646	76389657	+	17.3158	2.17393	-0.108901	2.06502	8.15193e-18	0.721469	2.56447e-15	1.70647e-17	0.751684	1.62019e-14	BS	Book
chr1	76646023	76646356	42.9619	3.47389	23.3546	1.35181	23.1479	0	76646238	76646163	76646174	-	2.64912	3.20102	-3.66289	-0.461863	9.74945e-18	1.67684e-07	0.498669	2.02713e-17	7.54945e-07	0.573251	L	Lost
chr1	76888161	76888635	49.59	26.3399	24.1783	8.68219	26.7993	4.52102	76888356	76888379	76888390	-	16.5263	3.35395	-0.910474	2.44347	1.48282e-17	0.0496052	1.05412e-08	3.03614e-17	0.0657241	3.41345e-08	L	Lost
chr1	76904135	76904538	42.905	8.20013	23.7546	5.59598	22.1129	0	76904412	0	0	0	0	2.41224	-2.35595	0.056291	9.99538e-14	3.24584e-06	0.905669	1.45406e-13	1.01382e-05	0.927368	L	Lost
chr1	77035014	77035396	44.543	40.2355	22.9024	20.5501	16.99	9.5304	77035288	77035274	77035285	-	17.0877	2.5927	-0.15125	2.44145	1.90712e-16	0.679205	1.61568e-13	3.5211e-16	0.712265	8.47634e-13	L	Lost
chr1	77181187	77182006	73.3635	65.1393	21.7023	13.8012	22.671	8.04948	77181637	77181665	77181676	+	14.1579	2.24748	-0.18766	2.05982	4.69264e-14	0.6025	2.69555e-11	7.0225e-14	0.640549	1.12989e-10	L	Lost
chr1	77409893	77410745	125.339	56.7352	38.7103	17.5633	34.2608	8.23736	77410049	77410430	77410441	-	17.8772	3.01397	-1.14715	1.86682	1.2753e-25	0.00123506	2.11446e-09	5.51764e-25	0.00216966	7.32814e-09	L	Lost
chr1	77414526	77414889	48.7235	4.72624	23.7214	3.08621	18.932	0	77414680	77414547	77414558	+	7.33333	2.94915	-3.28706	-0.337907	6.6702e-16	1.2312e-07	0.568789	1.17348e-15	5.78087e-07	0.639542	L	Lost
chr1	77433059	77434082	112.912	55.4829	31.6396	12.6432	21.3466	4.8115	77433448	77433812	77433823	-	5.14035	2.36716	-1.03188	1.33527	5.14931e-16	0.00498699	2.24071e-05	9.15687e-16	0.00786427	5.17063e-05	L	Lost
chr1	77443285	77444441	298.159	79.4073	147.861	23.2537	135.091	10.8575	77443883	77443847	77443858	-	17.9123	3.68411	-1.90895	1.77516	4.98951e-30	2.08559e-06	2.08484e-07	3.17832e-29	6.86956e-06	5.9217e-07	BA	Book
chr1	77447933	77448959	148.327	49.3997	47.5187	10.4217	45.5607	2.36763	77448289	77448585	77448596	+	10.0877	2.85157	-1.58534	1.26622	7.30564e-17	0.00024055	0.000574452	1.40192e-16	0.00048285	0.00112332	L	Lost
chr1	77449038	77450997	1233.97	317.232	334.879	59.6326	282.934	52.2838	77450635	77449519	77449530	+	14.3158	5.2986	-1.95886	3.33974	1.45318e-93	2.87125e-10	1.20643e-36	1.64369e-90	2.94707e-09	9.17889e-35	BA	Book
chr1	77452214	77452962	81.9347	63.5784	24.9547	21.226	23.2821	15.5598	77452673	77452663	77452674	+	16.5263	3.56584	-0.360195	3.20565	1.63177e-25	0.354207	1.15801e-19	6.98596e-25	0.397898	1.17122e-18	BS	Book
chr1	77453169	77453963	115.788	53.7332	42.486	12.1561	37.4171	6.54964	77453349	77453286	77453297	-	7.85965	2.79704	-1.09413	1.70291	3.33629e-18	0.00610792	7.10423e-07	7.24546e-18	0.00949385	1.91491e-06	L	Lost
chr1	77469263	77469536	62.8697	4.43802	46.6475	3.47389	52.1509	0	77469398	77469288	77469299	+	2.35088	3.59495	-3.80721	-0.212254	4.63671e-26	6.25757e-10	0.725025	2.0867e-25	5.83504e-09	0.777691	L	Lost
chr1	77472496	77472876	41.6718	6.75395	21.2454	3.47389	16.875	0	77472636	77472613	77472624	+	7.49123	2.44171	-2.62532	-0.183602	2.30872e-09	2.19546e-05	0.746037	2.55543e-09	5.52127e-05	0.795603	L	Lost
chr1	77499053	77500505	276.71	125.338	50.3663	21.2311	59.056	13.8885	77499982	77499937	77499948	-	16.1579	3.12798	-1.14474	1.98324	4.42428e-35	0.000238325	8.10779e-14	4.34276e-34	0.000478696	4.37883e-13	BA	Book
chr1	77511818	77512320	44.543	62.8183	14.1604	22.0013	4.8017	10.8053	77511972	77511836	77511847	+	7.15789	1.71495	0.490979	2.20593	6.4326e-05	0.344808	2.68106e-07	6.48631e-05	0.388368	7.52119e-07	BM	Book
chr1	77515228	77515982	112.845	47.7648	40.7911	14.2782	46.9795	8.78419	77515467	77515456	77515467	-	18.1053	2.7298	-1.25059	1.47921	8.43921e-20	0.000898794	6.33386e-06	2.12676e-19	0.00161935	1.55227e-05	L	Lost
chr1	77626367	77626797	47.5424	13.6967	24.2021	5.97858	24.1198	0	77626588	77626621	77626632	+	0.0701754	2.90095	-1.74377	1.15718	2.75136e-14	0.000515117	0.0117101	4.20341e-14	0.00096823	0.0192221	L	Lost
chr1	77692981	77693356	38.7293	9.74578	21.6739	5.78982	19.6297	0	77693233	77693120	77693131	+	4.89474	2.9372	-2.00942	0.927783	2.19917e-16	6.29998e-05	0.0522113	4.03811e-16	0.000141913	0.0767595	L	Lost
chr1	77953424	77953879	38.7103	66.004	14.9984	33.2928	10.0075	19.143	77953538	77953504	77953515	-	11.6316	1.936	0.760574	2.69658	4.75452e-08	0.0656415	1.04463e-14	5.02555e-08	0.085019	6.20253e-14	BS	Book
chr1	77955411	77956362	88.2813	25.0875	31.6586	7.14163	25.1601	0	77956041	77955620	77955631	-	8.92982	2.39865	-1.82577	0.572875	2.22784e-19	6.1925e-07	0.0824482	5.40406e-19	2.377e-06	0.116727	L	Lost
chr1	78061046	78061551	34.1488	38.4016	15.8127	20.9377	12.7209	11.2745	78061302	78061264	78061275	-	10.5439	2.31704	0.167248	2.48429	2.15697e-11	0.676101	2.32786e-12	2.65806e-11	0.70947	1.08864e-11	BS	Book
chr1	78101751	78102243	32.4871	55.6716	12.9224	27.6024	10.9945	22.1554	78102024	78101924	78101935	+	13.5614	2.41885	0.777272	3.19612	3.53429e-12	0.0425145	5.72651e-21	4.58409e-12	0.0570441	6.72443e-20	BS	Book
chr1	78116532	78116884	57.1746	11.3858	37.5482	4.92008	41.1018	0	78116680	78116836	78116847	-	0.859649	2.85859	-2.3381	0.520491	1.87363e-16	2.37605e-06	0.256271	3.46116e-16	7.7125e-06	0.323201	L	Lost
chr1	78157815	78158092	41.6575	24.5111	29.5778	14.0894	23.0652	6.57282	78157981	78157999	78158010	+	13.7193	3.26763	-0.791157	2.47647	5.90362e-20	0.0552646	3.69597e-10	1.51073e-19	0.0725902	1.3794e-09	L	Lost
chr1	78164411	78165004	119.502	14.1787	54.6037	5.2083	48.2151	0	78164725	78164547	78164558	-	11.1228	3.13064	-3.01631	0.114329	1.01547e-23	2.5092e-11	0.781698	3.68257e-23	3.51838e-10	0.825467	L	Lost
chr1	78201229	78201624	69.9736	41.3041	33.3298	20.5602	27.1267	14.4132	78201416	78201350	78201361	+	-0.368421	2.65636	-0.785273	1.87109	1.03127e-17	0.0387249	2.62228e-08	2.13978e-17	0.0523173	8.15822e-08	BS	Book
chr1	78304260	78304618	44.9858	5.5016	26.6638	3.18567	20.0526	0	78304436	78304422	78304433	+	5.57895	2.99101	-3.12847	-0.137467	4.88523e-18	1.36704e-07	0.810594	1.04337e-17	6.33625e-07	0.849183	L	Lost
chr1	78306386	78306795	61.9795	34.7389	33.7203	13.8012	42.5058	8.75627	78306577	78306598	78306609	-	7.15789	3.36269	-0.851278	2.51141	1.12432e-22	0.0340277	1.48086e-11	3.71269e-22	0.0463776	6.38421e-11	L	Lost
chr1	78307086	78307573	60.3225	38.1134	22.4692	16.0177	20.6046	8.65513	78307312	78307458	78307469	-	7.94737	2.81575	-0.666236	2.14951	1.35203e-11	0.187841	8.42302e-07	1.68634e-11	0.223289	2.25302e-06	L	Lost
chr1	78564599	78565280	68.2692	7.04217	25.3784	2.99183	18.3913	0	78564821	78564980	78564991	+	7.57895	1.90272	-3.23489	-1.33217	1.45042e-10	6.91719e-10	0.00631733	1.70243e-10	6.34896e-09	0.0107749	L	Lost
chr1	78597194	78598023	69.4408	19.9736	22.0312	6.17751	17.1423	0	78597451	78597187	78597198	+	6.01754	1.88005	-1.80838	0.0716713	2.36209e-09	3.33693e-05	0.851494	2.61331e-09	8.02551e-05	0.883385	L	Lost
chr1	78598602	78599254	115.002	31.6426	33.7156	12.1561	27.3464	6.24296	78599137	78599116	78599127	-	11.0351	2.93639	-1.8465	1.08989	9.7017e-18	2.73328e-05	0.00447189	2.01795e-17	6.70922e-05	0.00780018	L	Lost
chr1	78651193	78651427	58.294	4.63186	49.9662	4.1498	40.2724	0	78651313	78651260	78651271	-	12.4561	3.51015	-3.68801	-0.177861	2.4382e-24	2.22736e-09	0.768205	9.38042e-24	1.75281e-08	0.814533	L	Lost
chr1	78657816	78658303	59.9367	17.6577	25.3926	6.94779	22.0783	0	78658063	78658068	78658079	-	13.8421	2.24445	-1.77432	0.470136	8.06742e-15	1.28213e-05	0.203383	1.28909e-14	3.4249e-05	0.263041	L	Lost
chr1	78673194	78673540	38.3103	7.91191	22.9024	5.30776	24.9796	0	78673283	78673253	78673264	-	7.47368	2.99769	-2.28037	0.717311	5.3588e-17	1.42768e-05	0.155443	1.04248e-16	3.76977e-05	0.207125	L	Lost
chr1	78730839	78731306	73.2734	30.6835	35.3536	10.034	30.9607	0	78731088	78731102	78731113	-	12.7719	2.30057	-1.26286	1.03771	1.56542e-16	0.000522852	0.00134972	2.91209e-16	0.000981355	0.00252482	L	Lost
chr1	78818483	78819052	88.2908	18.428	41.6575	6.56011	24.6646	0	78818807	78818808	78818819	+	14.807	2.46523	-2.25418	0.211054	9.95255e-17	7.67019e-08	0.575924	1.88734e-16	3.83045e-07	0.64645	L	Lost
chr1	79195566	79196223	82.9055	101.393	28.3256	33.4764	28.6399	37.7822	79195697	79195624	79195635	-	16.1228	4.23901	0.297266	4.53627	1.27892e-33	0.413146	7.23505e-38	1.10736e-32	0.457668	6.3768e-36	BS	Book
chr1	79375091	79375368	35.001	7.91191	22.0834	4.63186	16.6321	0	79375244	79375153	79375164	+	3.35088	2.69056	-2.14976	0.540802	3.33479e-14	4.56578e-05	0.280062	5.06058e-14	0.000106248	0.349282	L	Lost
chr1	79387858	79388725	69.0787	121.571	20.3932	31.4538	17.8711	19.8726	79388419	79388492	79388503	+	17.8772	2.2572	0.815076	3.07227	1.66592e-15	0.0125128	2.86454e-28	2.82479e-15	0.0184135	7.8389e-27	BM	Book
chr1	79577510	79578889	199.593	104.778	32.9108	21.6086	21.5514	14.2546	79578507	79578562	79578573	+	16.1579	2.7238	-0.926465	1.79734	1.84637e-28	0.00230942	4.83515e-12	1.0276e-27	0.00386494	2.18529e-11	BA	Book
chr1	79599152	79599479	47.8618	5.30776	29.5778	3.66774	27.2489	0	79599261	79599278	79599289	-	1.15789	2.64785	-3.22729	-0.57944	8.01467e-15	8.10962e-08	0.312035	1.28109e-14	4.02717e-07	0.384051	L	Lost
chr1	79607514	79608742	155.826	96.1902	50.4279	24.024	50.4088	16.5268	79608067	79608625	79608636	+	13.7544	3.1251	-0.691187	2.43391	1.19505e-37	0.0173838	3.10392e-21	1.44724e-36	0.024937	3.76296e-20	BA	Book
chr1	79668432	79668723	21.6312	36.4734	14.5604	21.4198	8.62423	12.1125	79668604	79668540	79668551	-	10.8246	1.94406	0.74702	2.69108	1.36392e-06	0.10293	7.9286e-12	1.39706e-06	0.128631	3.51688e-11	BM	Book
chr1	79739574	79740355	74.1731	86.1715	24.5973	25.9522	17.8711	16.0892	79739935	79740056	79740067	+	17.9123	2.26163	0.208351	2.46998	1.93545e-13	0.569441	2.10315e-15	2.7492e-13	0.609245	1.344e-14	BS	Book
chr1	79853743	79854538	78.2918	53.0675	25.8116	15.3418	17.6303	5.0196	79853954	79853940	79853951	-	14.3158	2.50694	-0.562675	1.94427	4.52148e-18	0.11029	2.91997e-10	9.69218e-18	0.137102	1.10092e-09	L	Lost
chr1	79871336	79871659	53.7419	10.9037	35.4106	5.98367	30.1874	0	79871511	79871538	79871549	-	9.36842	2.36472	-2.32076	0.0439585	4.845e-14	9.90864e-07	0.920126	7.2368e-14	3.58569e-06	0.938829	L	Lost
chr1	80015240	80015710	30.7874	54.8069	11.6607	24.4116	8.01901	14.232	80015440	80015470	80015481	+	7.7193	1.97149	0.825581	2.79707	2.6099e-08	0.0409999	5.45798e-16	2.77849e-08	0.0551754	3.71973e-15	BM	Book
chr1	80149681	80150222	77.1677	30.2015	35.4106	13.99	22.511	5.1702	80149870	80149892	80149903	+	8.22807	2.61322	-1.36097	1.25226	9.26004e-18	0.000503021	0.000319876	1.93034e-17	0.000948015	0.000645478	L	Lost
chr1	80204003	80204449	76.1874	25.3758	36.2106	12.2556	34.7107	0	80204216	80204092	80204103	-	6.47368	2.67949	-1.58787	1.09162	6.37478e-21	2.49058e-05	0.00141538	1.78936e-20	6.17603e-05	0.00264051	L	Lost
chr1	80232793	80233027	43.7904	6.65957	35.0343	2.99183	30.4986	0	80232908	80232968	80232979	+	1.12281	2.69252	-2.79897	-0.106453	1.78655e-15	5.19475e-07	0.841144	3.02043e-15	2.0369e-06	0.874787	L	Lost
chr1	80233591	80234839	237.137	64.364	45.4095	12.1612	42.5815	5.89902	80234217	80234401	80234412	-	9.92982	3.14378	-1.89311	1.25067	2.5951e-30	5.82865e-08	3.24306e-05	1.69541e-29	3.01414e-07	7.34919e-05	L	Lost
chr1	80319847	80320472	97.4802	16.2064	56.2464	5.8842	67.2406	3.84553	80320137	80320426	80320437	+	4.19298	4.57468	-2.55509	2.01959	7.87496e-38	6.2817e-09	3.43683e-06	9.69245e-37	4.34925e-08	8.66369e-06	L	Lost
chr1	80399770	80400380	58.7509	13.8012	22.8929	4.1498	14.7309	0	80400238	80399946	80399957	-	6.57895	2.02079	-2.15069	-0.129897	8.28021e-12	1.16868e-06	0.746952	1.0463e-11	4.14041e-06	0.79622	L	Lost
chr1	80619207	80619978	205.359	56.3475	92.5045	13.3141	93.0122	6.67345	80619498	80619649	80619660	-	3.36842	3.75451	-1.86638	1.88813	6.7318e-46	1.15321e-08	1.41954e-10	1.64694e-44	7.34592e-08	5.53162e-10	L	Lost
chr1	80815158	80816000	48.752	91.0865	14.1604	26.9214	12.691	20.2581	80815539	80815444	80815455	+	13.7895	1.94732	0.898229	2.84554	2.39498e-10	0.0113879	2.33002e-21	2.77918e-10	0.0168856	2.86882e-20	BM	Book
chr1	81087475	81087800	22.8976	36.861	15.4032	20.5551	12.691	10.7889	81087681	81087641	81087652	-	17.9123	2.4245	0.67381	3.09831	3.68319e-10	0.109563	3.57065e-16	4.22921e-10	0.136264	2.48539e-15	BS	Book
chr1	81329637	81330290	42.5382	67.5446	14.5937	22.1952	14.09	14.36	81329829	81329827	81329838	-	17.8772	2.81651	0.661154	3.47766	1.72705e-16	0.0770775	7.89485e-25	3.20119e-16	0.0985298	1.4403e-23	BS	Book
chr1	81605450	81605888	50.4042	11.8679	24.1831	4.8257	25.5685	0	81605710	81605678	81605689	-	2.66667	2.64215	-2.09068	0.55147	1.1327e-16	5.4957e-06	0.198894	2.13687e-16	1.61571e-05	0.2581	L	Lost
chr1	81650449	81650779	34.601	5.30776	20.4548	3.18567	25.5743	0	81650666	81650687	81650698	+	10.0351	2.84545	-2.7589	0.0865422	8.40779e-15	5.0388e-06	0.881974	1.34114e-14	1.49721e-05	0.907983	L	Lost
chr1	81714804	81715118	54.1562	4.43802	34.1725	3.28005	38.4181	0	81714962	0	0	0	0	4.36973	-3.59163	0.778093	3.61322e-30	4.48414e-09	0.214235	2.33183e-29	3.23195e-08	0.275542	L	Lost
chr1	82003936	82004976	209.831	37.8201	61.1985	8.97042	82.965	0	82004535	82004702	82004713	+	12.9123	3.73529	-2.46494	1.27035	2.51616e-43	2.1799e-12	6.12117e-05	4.9126e-42	4.10492e-11	0.000134492	L	Lost
chr1	82279302	82279875	70.0685	55.5823	25.8875	22.1952	24.0899	8.66337	82279526	82279556	82279567	-	4.26316	2.35961	-0.347114	2.0125	4.84725e-16	0.323719	5.04961e-11	8.63738e-16	0.366684	2.05972e-10	L	Lost
chr1	82280236	82280909	115.731	35.0221	51.6565	14.7602	48.6591	7.87223	82280781	82280730	82280741	-	7.63158	2.85362	-1.71674	1.13688	2.58185e-25	1.50803e-06	0.000362707	1.0867e-24	5.16628e-06	0.000726635	L	Lost
chr1	82288517	82289519	194.837	240.066	50.39	57.5999	53.252	56.6031	82289135	82289114	82289125	-	10.5789	3.0747	0.300099	3.3748	5.42082e-21	0.44498	7.72568e-25	1.53172e-20	0.488895	1.41095e-23	BS	Book
chr1	82320792	82321395	54.5799	21.226	22.0834	8.68219	17.1878	2.85997	82321155	82321160	82321171	-	13.8947	2.3782	-1.35676	1.02144	3.01313e-14	0.00101084	0.00592861	4.58722e-14	0.00180379	0.0101624	L	Lost
chr1	82666712	82667492	43.3288	80.2771	14.1557	24.9932	8.35106	14.9356	82667106	82667104	82667115	-	14.0351	1.74403	0.888085	2.63212	1.74024e-08	0.0133884	2.30396e-18	1.86271e-08	0.0195975	2.02121e-17	BM	Book
chr1	82721626	82722452	190.933	142.236	51.9474	45.0663	75.6927	29.7171	82722093	82721960	82721971	-	17.9123	3.24921	-0.428677	2.82054	1.41801e-21	0.298005	3.78761e-16	4.2301e-21	0.340191	2.62779e-15	BS	Book
chr1	82800350	82800876	49.1472	89.8341	18.7646	34.4456	9.26242	20.6603	82800507	82800580	82800591	-	18.1053	1.68814	0.864163	2.55231	5.22803e-09	0.0102501	1.26325e-19	5.70097e-09	0.0153224	1.27245e-18	BM	Book
chr1	82816376	82817608	388.126	81.2514	104.541	16.5992	102.334	9.19687	82817148	82817367	82817378	+	13.7193	4.22813	-2.26772	1.9604	2.60195e-61	7.713e-13	2.30591e-12	2.16402e-59	1.66069e-11	1.07926e-11	L	Lost
chr1	82823380	82823833	168.339	25.7584	100.437	13.5079	76.0105	4.05042	82823655	82823651	82823662	+	11.2632	3.83999	-2.68733	1.15267	7.24506e-47	5.77018e-14	0.000559674	1.91768e-45	1.69377e-12	0.00109587	L	Lost
chr1	82853313	82854051	295.679	133.26	177.9	72.2759	142.872	67.2071	82853928	82853911	82853922	+	13.0175	4.89019	-1.15569	3.7345	3.38873e-66	0.000321121	1.03802e-36	4.06324e-64	0.000628736	7.98707e-35	BA	Book
chr1	82854132	82855078	326.004	135.854	165.711	60.2091	163.938	48.9517	82854268	82854226	82854237	+	12.8596	5.34077	-1.26359	4.07718	4.71363e-44	0.00444593	2.21561e-25	9.83687e-43	0.00707085	4.3233e-24	BA	Book
chr1	82872552	82873231	60.4648	29.8138	25.4401	9.74578	24.252	3.81592	82872761	82873101	82873112	-	8.61404	2.89342	-1.01958	1.87384	1.77956e-18	0.0119025	3.20805e-07	3.97666e-18	0.0175863	8.93091e-07	L	Lost
chr1	83035312	83035925	68.7072	28.0845	23.3024	9.6514	18.9324	0	83035725	83035730	83035741	-	16.3509	2.23625	-1.32983	0.906418	2.60118e-13	0.000898382	0.0101701	3.65914e-13	0.00161869	0.0168523	L	Lost
chr1	83113099	83113486	54.5799	5.01446	34.182	3.08621	22.4746	0	83113251	83113164	83113175	-	10.1579	2.55967	-3.30742	-0.747746	9.00231e-16	8.49759e-09	0.171535	1.56598e-15	5.655e-08	0.22624	L	Lost
chr1	83986018	83986276	37.0438	43.9083	32.4681	34.6446	30.0996	26.9212	83986144	83986155	83986166	-	11.3158	3.76307	0.2288	3.99187	5.68218e-19	0.598674	1.03872e-20	1.32966e-18	0.636948	1.18957e-19	BS	Book
chr1	84087218	84087872	52.9229	52.8736	21.6549	22.2896	20.2853	13.8697	84087482	84087450	84087461	-	17.9123	2.60263	-0.00101924	2.60161	1.06968e-16	0.997764	8.67547e-16	2.02213e-16	0.998029	5.78587e-15	BS	Book
chr1	84173329	84173939	76.5589	12.0617	31.2253	4.92008	22.511	0	84173746	84173547	84173558	-	6.05263	2.48966	-2.68432	-0.19467	5.02323e-14	4.20444e-08	0.661261	7.49377e-14	2.26891e-07	0.722427	L	Lost
chr1	84178511	84179423	88.7335	26.3399	22.4834	8.58782	15.6265	0	84178935	84178926	84178937	+	9.05263	2.45182	-1.7493	0.702524	1.9854e-17	6.18783e-06	0.041327	4.01774e-17	1.7954e-05	0.0619877	L	Lost
chr1	84195028	84195820	85.3768	59.1455	34.1536	22.5778	27.3664	16.5268	84195488	84195447	84195458	-	12.9298	3.19462	-0.53001	2.66461	3.33875e-23	0.16134	2.76742e-15	1.15641e-22	0.194315	1.74257e-14	BS	Book
chr1	84401580	84402698	213.097	68.9958	54.561	15.4412	67.4834	9.25963	84402316	84402063	84402074	-	18.4737	3.13945	-1.63633	1.50312	1.03228e-24	1.96586e-05	4.31205e-06	4.10168e-24	5.00694e-05	1.07628e-05	L	Lost
chr1	84403306	84403833	76.1874	14.9541	33.3013	6.75395	27.4587	0	84403621	0	0	0	0	2.89492	-2.3356	0.559328	1.47187e-19	1.96642e-07	0.17432	3.62156e-19	8.66355e-07	0.229386	L	Lost
chr1	84487737	84488625	87.5382	126.784	29.1636	44.4847	28.83	34.1948	84488254	84488186	84488197	-	18.4737	2.44062	0.532897	2.97351	4.10976e-20	0.0832861	3.03583e-29	1.0688e-19	0.105848	9.23072e-28	BS	Book
chr1	84496630	84497094	52.485	16.112	22.0691	7.42985	16.99	0	84496899	84497000	84497011	+	8.91228	2.15786	-1.69189	0.465971	1.77323e-13	4.39918e-05	0.216516	2.52629e-13	0.000102759	0.278129	L	Lost
chr1	84518196	84519433	194.48	138.374	75.8443	31.6527	82.579	20.2849	84519041	84518498	84518509	+	17.9123	3.1827	-0.496155	2.68654	1.78707e-29	0.143552	1.82986e-20	1.08987e-28	0.17458	2.0325e-19	BS	Book
chr1	84546200	84546545	44.1667	6.65957	25.4211	3.66774	13.7992	0	84546367	84546380	84546391	-	0.280702	2.43282	-2.8124	-0.37958	1.08794e-13	3.82942e-07	0.469164	1.57779e-13	1.55733e-06	0.544613	L	Lost
chr1	84636918	84637907	501.914	40.0467	179.472	12.9315	172.511	0	84637181	84637616	84637627	+	5.7193	4.3017	-3.66836	0.633335	4.95766e-76	9.06929e-31	0.0276827	1.17642e-73	3.84685e-27	0.0428149	L	Lost
chr1	84689585	84690202	65.3931	26.9163	32.0918	11.674	27.0175	4.68251	84689758	84689754	84689765	-	16.1228	2.91474	-1.26199	1.65274	1.19371e-23	0.0005609	1.07441e-06	4.30093e-23	0.00104623	2.84671e-06	L	Lost
chr1	84692484	84693245	248.517	98.5112	111.174	28.944	100.455	21.4815	84692894	84692899	84692910	-	8.85965	3.54879	-1.33506	2.21373	7.17077e-19	0.00673857	7.05788e-08	1.66445e-18	0.0103959	2.10046e-07	BA	Book
chr1	84715676	84716189	56.6939	25.9573	22.1118	12.2556	22.624	0	84716045	84716127	84716138	+	18.4737	2.11383	-1.14559	0.968245	2.94005e-13	0.00263039	0.00429294	4.1203e-13	0.00435634	0.00750927	L	Lost
chr1	84767951	84768325	38.753	23.7357	20.4121	11.7735	19.1489	5.37177	84768125	84768183	84768194	+	13.7193	2.71749	-0.710213	2.00728	2.99387e-15	0.0875304	1.54965e-07	4.96269e-15	0.110745	4.46614e-07	L	Lost
chr1	84828922	84830620	238.575	93.4024	54.542	21.8075	82.4983	12.4172	84829640	84830202	84830213	-	16.3333	3.52858	-1.35635	2.17223	4.0499e-35	0.000101853	5.42433e-13	3.9926e-34	0.000220349	2.70086e-12	BA	Book
chr1	84835976	84836606	131.605	151.668	69.1688	60.8748	51.0097	49.0332	84836212	0	0	0	0	3.21755	0.205645	3.42319	1.25065e-16	0.657965	1.80875e-18	2.34802e-16	0.692538	1.60293e-17	BS	Book
chr1	84848174	84848828	117.878	21.4198	35.8248	7.91191	22.6719	0	84848532	84848603	84848614	-	0.684211	2.17507	-2.4615	-0.286431	1.3987e-13	3.32351e-09	0.435017	2.01034e-13	2.48735e-08	0.511023	L	Lost
chr1	84852471	84853368	124.021	25.5645	36.6296	6.56011	26.7953	0	84852860	84852801	84852812	-	16.1228	2.31034	-2.2588	0.0515463	1.42671e-12	2.94992e-07	0.892481	1.89853e-12	1.24239e-06	0.916713	L	Lost
chr1	84856218	84856607	38.734	14.5715	21.2691	7.42985	14.4552	0	84856520	84856458	84856469	+	1.01754	2.12895	-1.43962	0.68933	1.41889e-09	0.00259911	0.108362	1.5864e-09	0.00430938	0.149693	L	Lost
chr1	84856795	84858603	939.292	349.586	332.055	78.5478	211.302	60.5452	84857501	84857521	84857532	+	17.8772	4.08446	-1.42716	2.6573	2.61728e-54	9.97207e-06	3.50908e-23	1.2335e-52	2.73994e-05	5.27808e-22	BA	Book
chr1	84861214	84861925	100.77	24.6055	30.0016	6.65957	13.1137	0	84861411	84861380	84861391	-	6.89474	2.43803	-2.04541	0.392623	6.22817e-16	6.03644e-07	0.278097	1.0989e-15	2.32318e-06	0.347153	L	Lost
chr1	84863638	84864213	72.8876	22.4834	25.3784	8.9755	22.777	2.9533	84863768	84863884	84863895	+	5.14035	2.40217	-1.71574	0.686424	1.50731e-16	1.41254e-05	0.0533644	2.80738e-16	3.73446e-05	0.0782852	L	Lost
chr1	84868243	84869295	422.433	134.214	132.396	37.7257	115.727	22.9292	84868910	84868858	84868869	-	8.87719	3.89494	-1.65519	2.23975	6.72604e-33	3.71444e-05	2.79086e-11	5.48114e-32	8.83762e-05	1.1683e-10	BA	Book
chr1	84869438	84869962	84.572	35.8969	32.5061	11.5796	22.116	4.27628	84869770	84869905	84869916	-	5.45614	2.95103	-1.25399	1.69704	4.12085e-24	0.000565072	2.48203e-07	1.55266e-23	0.00105349	6.98828e-07	L	Lost
chr1	84878618	84879182	79.1298	27.1153	31.6633	10.8094	24.3419	2.77044	84878957	84878913	84878924	-	13.8947	2.62522	-1.56316	1.06207	9.62483e-20	3.81015e-05	0.00188221	2.41139e-19	9.04188e-05	0.00345239	L	Lost
chr1	84882178	84882824	197.794	151.966	76.6823	53.1618	74.4142	37.4508	84882536	84882479	84882490	+	17.5439	3.54588	-0.380892	3.16499	4.09757e-29	0.312486	8.76483e-23	2.41926e-28	0.355122	1.2507e-21	BS	Book
chr1	84886622	84886998	91.3329	18.6218	53.8179	6.75395	47.8366	0	84886833	84886868	84886879	+	0.859649	3.23066	-2.29586	0.934801	8.70176e-21	6.28927e-07	0.0249397	2.41595e-20	2.40901e-06	0.0388557	L	Lost
chr1	84908756	84910149	385.96	344.199	117.883	90.2269	104.364	73.5916	84909374	84910112	84910123	+	18.1053	3.18109	-0.167428	3.01366	1.84299e-31	0.613297	5.79094e-28	1.33145e-30	0.650628	1.53759e-26	BS	Book
chr1	84921847	84922475	63.2697	16.8874	21.2122	5.78982	11.7529	0	84922311	84922301	84922312	+	15.5439	1.86866	-1.93253	-0.0638637	6.10977e-09	2.06448e-05	0.873615	6.64432e-09	5.2322e-05	0.901456	L	Lost
chr1	84925854	84926773	156.155	67.3406	49.5425	20.8434	46.2427	8.96365	84926179	84926088	84926099	+	18.4737	2.48612	-1.20537	1.28076	3.45168e-21	0.000287884	7.09689e-06	9.94109e-21	0.000568381	1.72977e-05	L	Lost
chr1	84930273	84930865	107.417	70.1487	44.9431	27.1153	36.7715	10.3796	84930543	84930502	84930513	-	17.8772	2.18184	-0.620487	1.56136	2.06339e-16	0.0597957	3.07611e-08	3.79702e-16	0.0780176	9.50826e-08	BS	Book
chr1	87689475	87689934	54.0945	99.1871	28.6971	41.3883	28.5644	37.304	87689595	87689548	87689559	-	17.8772	2.53673	0.873837	3.41056	9.93828e-16	0.013918	3.33142e-28	1.72235e-15	0.0203131	9.05086e-27	BM	Book
chr1	87690961	87691437	79.5963	28.0794	35.02	10.2278	23.7373	0	87691130	87691236	87691247	-	6.77193	2.30992	-1.51627	0.793652	1.16271e-16	4.50616e-05	0.0164665	2.19009e-16	0.000105012	0.0263939	L	Lost
chr1	87740628	87741259	55.7895	79.4124	21.2074	28.6558	28.1368	14.5741	87740996	87740988	87740999	+	16.3509	2.66135	0.504605	3.16595	1.29397e-15	0.18433	1.59344e-21	2.21737e-15	0.219477	2.00186e-20	BS	Book
chr1	87783764	87784256	54.9467	9.45756	25.3974	5.30776	21.0637	0	87784123	87783827	87783838	+	6.89474	2.19681	-2.59086	-0.394043	4.51548e-13	1.11385e-07	0.384922	6.2451e-13	5.30028e-07	0.460823	L	Lost
chr1	87805348	87806022	109.503	37.9195	52.5277	12.9315	45.7575	3.91182	87805476	87805511	87805522	+	14.7719	2.83329	-1.53371	1.29959	8.13544e-26	9.63114e-06	2.81092e-05	3.5773e-25	2.65627e-05	6.41315e-05	L	Lost
chr1	87904109	87904748	64.5836	26.827	23.3404	9.26372	11.6612	3.64711	87904557	87904136	87904147	+	7.07018	2.0658	-1.29192	0.773884	5.93756e-12	0.00112965	0.0265772	7.57726e-12	0.00199835	0.0412027	L	Lost
chr1	87905713	87906712	109.15	187.496	28.3019	47.576	29.8755	40.0597	87906120	87906096	87906107	-	15.1404	2.35644	0.775038	3.13148	1.18439e-17	0.0167559	1.60148e-30	2.44539e-17	0.0241138	5.78119e-29	BM	Book
chr1	87918403	87918777	50.4279	8.48835	22.0929	3.56827	11.4778	0	87918583	87918627	87918638	+	11.1228	1.83545	-2.51574	-0.680293	4.34005e-07	5.59295e-06	0.172747	4.48164e-07	1.64103e-05	0.227591	L	Lost
chr1	87959263	87959846	86.6101	25.4701	32.4776	10.4217	26.306	0	87959401	87959412	87959423	-	13.9474	2.7628	-1.75489	1.00791	3.03679e-19	1.47072e-05	0.00540141	7.28457e-19	3.87078e-05	0.00930602	L	Lost
chr1	88084163	88085152	864.951	111.06	509.108	43.1278	313.162	34.005	88084628	88084695	88084706	+	16.5263	5.55678	-2.96418	2.5926	5.48016e-85	7.52814e-18	7.48246e-18	2.99933e-82	6.61793e-16	6.23226e-17	BA	Book
chr1	88097963	88098450	84.6005	13.5079	40.8575	4.63186	29.4448	0	88098121	88098301	88098312	+	9.17544	2.9197	-2.64689	0.272805	5.90548e-23	1.38299e-09	0.501739	1.99951e-22	1.15447e-08	0.576296	L	Lost
chr1	88115121	88115813	70.3784	20.8383	27.5113	8.10575	22.3289	0	88115501	88115443	88115454	-	6.89474	2.83871	-1.73748	1.10123	5.80048e-18	5.69319e-05	0.0047371	1.2304e-17	0.000129569	0.00823146	L	Lost
chr1	88132841	88133718	164.611	43.4059	56.2891	14.1787	41.5649	5.50322	88133275	88133266	88133277	+	7.17544	2.50341	-1.89642	0.606989	7.57254e-16	2.52799e-06	0.0774891	1.32535e-15	8.14569e-06	0.110328	L	Lost
chr1	88174766	88175226	78.2681	25.187	41.2195	11.5796	40.7611	2.54381	88174877	88175149	88175160	+	11.2807	3.3912	-1.66301	1.72819	2.44319e-25	4.80433e-05	4.99705e-06	1.03077e-24	0.000111242	1.23815e-05	L	Lost
chr1	88196545	88198634	456.928	230.922	109.131	58.4747	112.033	42.6986	88197818	88197802	88197813	-	14.5789	2.85466	-0.989672	1.86499	5.22251e-31	0.00118483	1.75237e-13	3.62923e-30	0.0020878	9.16086e-13	BA	Book
chr1	88205486	88206562	555.436	232.726	222.952	67.7384	164.526	40.3366	88206006	88205609	88205620	+	4.12281	3.80719	-1.25542	2.55176	2.79309e-40	0.000350109	2.89359e-18	4.25969e-39	0.000681129	2.51443e-17	BA	Book
chr1	88207387	88208645	304.21	62.9127	110.841	12.7376	84.3071	2.10725	88207703	0	0	0	0	2.80884	-2.27986	0.528988	1.38288e-24	1.50494e-10	0.0804245	5.44376e-24	1.67378e-09	0.114133	L	Lost
chr1	88245378	88245792	58.218	8.39397	29.5494	4.1498	24.5844	0	88245509	0	0	0	0	2.63726	-2.78901	-0.151751	6.78056e-14	2.41933e-07	0.761195	1.00054e-13	1.04195e-06	0.808439	L	Lost
chr1	88334044	88334525	74.5256	31.742	27.0734	12.6382	15.8391	5.75001	88334199	88334320	88334331	-	14.5439	2.44292	-1.22549	1.21744	1.43152e-14	0.0025338	0.000621903	2.23924e-14	0.00421076	0.00121045	L	Lost
chr1	88339382	88340382	106.622	104.112	31.6538	27.6917	18.2228	12.887	88340131	88340116	88340127	+	14.807	1.85849	-0.0365902	1.8219	1.45196e-08	0.927707	4.51497e-08	1.55768e-08	0.936789	1.37073e-07	BS	Book
chr1	88346665	88346996	44.5668	12.832	23.3404	5.2083	16.9295	0	88346839	88346838	88346849	+	-0.157895	1.9771	-1.78803	0.189063	2.53854e-10	8.13391e-05	0.646467	2.94205e-10	0.000179389	0.709596	L	Lost
chr1	88349365	88349759	50.79	6.27189	28.7161	2.99183	18.3008	0	88349539	88349501	88349512	-	5.2807	1.91104	-3.03295	-1.12191	4.36476e-10	3.63645e-08	0.0297652	4.99644e-10	1.99691e-07	0.0457686	L	Lost
chr1	88361537	88362360	160.089	60.0203	49.4476	18.1398	53.1253	11.8427	88362044	88361997	88362008	+	11.2632	2.91525	-1.42433	1.49092	5.35027e-21	0.000247286	7.48924e-06	1.51254e-20	0.000494995	1.82017e-05	BA	Book
chr1	88364696	88365104	51.1616	34.2569	26.1927	20.5501	13.8093	8.33286	88364855	88364817	88364828	-	3.19298	2.3904	-0.595225	1.79518	3.85364e-12	0.159002	1.21493e-06	4.98496e-12	0.191742	3.19906e-06	L	Lost
chr1	88384849	88385739	218.781	86.1562	68.3641	19.2977	62.3984	7.32246	88385525	88385455	88385466	-	11.1404	2.76338	-1.34104	1.42235	8.53183e-21	0.000289443	5.06939e-06	2.37071e-20	0.000571292	1.25507e-05	L	Lost
chr1	88388542	88389478	135.805	64.9302	44.162	13.99	25.3389	3.79587	88388889	88388897	88388908	-	14.807	2.0386	-1.06019	0.978412	9.137e-11	0.00771424	0.00331156	1.08446e-10	0.0117807	0.00587992	L	Lost
chr1	88394546	88395364	94.4097	28.0794	23.3071	8.10575	13.111	0	88394850	88394930	88394941	-	11.1754	1.81767	-1.76017	0.0575064	9.30806e-09	3.48891e-05	0.875048	1.00506e-08	8.35611e-05	0.902633	L	Lost
chr1	88406783	88407173	70.4021	21.0321	31.2348	10.5161	20.973	0	88407017	88406957	88406968	-	9.50877	2.47865	-1.73256	0.746088	1.86294e-12	0.000196965	0.0684546	2.46318e-12	0.000401949	0.0984476	L	Lost
chr1	88428189	88428806	128.334	45.9207	48.7899	16.2064	33.1517	4.27471	88428630	88428184	88428195	-	5.82456	2.11866	-1.46935	0.649313	6.2951e-13	0.000117317	0.0458563	8.60331e-13	0.000250499	0.0681476	L	Lost
chr1	88543782	88544715	293.094	40.817	116.597	11.5796	101.754	4.21182	88544317	88544327	88544338	+	12.9298	3.53065	-2.85487	0.675774	8.01115e-35	4.09508e-14	0.0404463	7.71403e-34	1.25075e-12	0.0607769	L	Lost
chr1	88549052	88550515	290.17	161.539	60.7557	28.6609	54.499	18.0821	88550104	88549596	88549607	-	17.8772	2.80506	-0.850674	1.95439	5.15796e-24	0.0130069	7.61121e-12	1.92505e-23	0.0190836	3.38051e-11	BA	Book
chr1	88593488	88593855	55.4559	20.5501	32.5061	13.5079	20.7416	0	88593608	88593639	88593650	-	7.38596	2.17929	-1.42323	0.756063	3.47269e-10	0.00192181	0.0606941	3.99224e-10	0.00326455	0.0881687	L	Lost
chr1	88615643	88616424	232.894	45.732	134.595	16.2064	126.189	8.10905	88616041	88616055	88616066	+	10.5439	3.56397	-2.34378	1.2202	2.54101e-38	3.74996e-11	9.78301e-05	3.27973e-37	4.98423e-10	0.000210132	L	Lost
chr1	88650114	88650695	73.2876	39.9422	23.3166	13.3141	13.711	5.8478	88650501	88650462	88650473	-	3.68421	2.43742	-0.868782	1.56864	3.0002e-14	0.0298082	6.39134e-06	4.56835e-14	0.0410371	1.5659e-05	L	Lost
chr1	88654675	88655186	54.5799	9.74578	29.9779	5.21338	20.6046	0	88654839	88654982	88654993	+	5.19298	2.53635	-2.50333	0.0330164	1.06144e-13	1.02907e-06	0.944309	1.5408e-13	3.70891e-06	0.957529	L	Lost
chr1	88904773	88905319	106.293	9.06988	65.4738	3.47389	74.7476	0	88905015	88904972	88904983	+	6.52632	3.66527	-3.55845	0.106813	1.06815e-33	1.79002e-13	0.817575	9.33851e-33	4.61907e-12	0.854925	L	Lost
chr1	88955402	88955873	56.6464	33.9636	25.8069	15.0485	22.0783	8.93366	88955575	88955731	88955742	+	9.4386	2.34486	-0.742108	1.60276	3.48001e-16	0.0383002	5.52913e-07	6.27856e-16	0.0517827	1.50421e-06	L	Lost
chr1	88969383	88969844	47.057	37.7308	22.0881	17.7572	13.7688	7.89822	88969696	88969678	88969689	+	16.9298	1.91371	-0.335605	1.5781	2.26782e-09	0.395981	3.61185e-06	2.51082e-09	0.44032	9.08061e-06	L	Lost
chr1	88985458	88985911	50.371	29.1379	21.2549	12.3499	11.0576	2.63934	88985660	88985612	88985623	-	15.3333	1.93226	-0.787177	1.14509	5.262e-10	0.0478201	0.000963073	6.00085e-10	0.0635597	0.00183184	L	Lost
chr1	89023714	89024196	85.3246	55.5772	44.5051	23.5419	63.3449	14.898	89024078	89024042	89024053	+	5.66667	3.00187	-0.621082	2.38079	4.17211e-17	0.148232	1.67787e-10	8.20281e-17	0.179822	6.49723e-10	BS	Book
chr1	89059289	89059714	53.7609	23.3481	24.2021	9.45756	20.0154	2.37046	89059519	89059607	89059618	+	16.1579	2.29102	-1.19352	1.0975	1.88398e-14	0.00229832	0.0018176	2.91983e-14	0.00384789	0.00334056	L	Lost
chr1	89081714	89082297	140.176	102.09	68.2692	37.9246	75.9883	25.5281	89082080	89082054	89082065	-	16.5263	3.08323	-0.460643	2.62258	9.03477e-17	0.305311	4.08375e-12	1.72002e-16	0.347702	1.86005e-11	BS	Book
chr1	89122000	89123716	830.893	133.528	278.418	20.2618	209.274	8.41237	89123141	89122393	89122404	-	10.5789	4.31172	-2.63558	1.67613	9.79312e-45	6.08904e-12	1.61187e-07	2.16207e-43	1.01185e-10	4.63638e-07	L	Lost
chr1	89127115	89127609	271.524	23.6363	167.006	11.9622	153.741	4.6723	89127362	89127395	89127406	-	12.9123	4.61923	-3.50855	1.11068	4.09741e-40	1.49402e-14	0.00675938	6.14123e-39	5.1626e-13	0.0114758	L	Lost
chr1	89187527	89188109	90.7383	61.0788	36.658	24.6055	22.4746	10.3999	89187710	89187709	89187720	-	17.8772	2.32847	-0.576627	1.75184	1.64948e-14	0.122865	4.21485e-08	2.56657e-14	0.151266	1.28375e-07	BS	Book
chr1	89209654	89210204	148.623	19.7798	81.6248	6.36627	67.6736	0	89209918	89209796	89209807	+	9.33333	2.92113	-2.9128	0.00832489	1.58477e-22	6.22759e-12	0.982486	5.16133e-22	1.03343e-10	0.986819	L	Lost
chr1	89228338	89228691	59.1604	21.5142	32.5108	11.192	21.2326	2.74154	89228576	89228545	89228556	-	17.8772	2.50594	-1.44597	1.05997	2.34727e-13	0.00117992	0.00748593	3.31349e-13	0.00208012	0.0126309	L	Lost
chr1	89228998	89229567	111.198	43.615	50.7615	17.951	68.3979	10.2282	89229129	89229154	89229165	+	16.3333	3.91349	-1.36046	2.55303	2.22456e-36	0.000194777	7.04576e-14	2.42877e-35	0.000397939	3.82963e-13	BA	Book
chr1	89372365	89372922	89.9525	31.4538	37.0865	10.6155	31.8394	0	89372491	89372500	89372511	-	15.1404	2.32077	-1.51469	0.806074	1.1019e-17	2.5201e-05	0.0114332	2.27978e-17	6.23921e-05	0.0188003	L	Lost
chr1	89391356	89391821	75.3494	18.3336	32.4396	9.55194	25.8304	0	89391545	89391509	89391520	+	16.5614	2.46635	-2.05429	0.412059	7.46654e-17	7.43841e-07	0.27298	1.43175e-16	2.7915e-06	0.341658	L	Lost
chr1	89447480	89447675	27.5113	7.23601	20.0169	6.27189	12.9072	0	89447580	0	0	0	0	1.96388	-1.91442	0.0494662	3.02768e-08	0.000449845	0.922085	3.2175e-08	0.000855399	0.940291	L	Lost
chr1	89454303	89454917	45.819	69.6667	14.1794	20.3613	5.52585	14.5512	89454635	89454610	89454621	-	14.3158	1.70668	0.59813	2.30481	4.61749e-09	0.0801201	1.29938e-15	5.0459e-09	0.102146	8.51491e-15	BM	Book
chr1	89554534	89555291	129.082	137.609	43.3193	47.7648	34.7843	35.0912	89555057	89554961	89554972	-	10.9474	2.43893	0.0837232	2.52265	7.94474e-20	0.794045	1.47631e-20	2.00811e-19	0.817733	1.6566e-19	BS	Book
chr1	89570279	89571250	409.081	121.849	128.31	30.8723	123.413	24.8054	89570924	89570932	89570943	+	17.8772	4.65941	-1.74339	2.91602	1.58626e-49	3.99964e-06	4.70739e-19	5.0732e-48	1.21864e-05	4.44081e-18	BA	Book
chr1	89572457	89573371	222.943	69.5621	78.3725	21.0321	59.4019	11.6777	89572821	89572546	89572557	+	6.42105	2.98158	-1.67646	1.30512	6.14109e-25	4.3339e-06	2.74516e-05	2.49295e-24	1.31048e-05	6.27134e-05	BA	Book
chr1	89625597	89625909	45.8332	6.56011	25.4164	3.76211	11.3427	0	89625784	89625665	89625676	+	5.19298	2.08681	-2.77164	-0.684825	4.68877e-11	3.08987e-07	0.176951	5.66085e-11	1.29203e-06	0.232458	L	Lost
chr1	89714078	89714701	69.8835	16.9818	24.1356	5.98367	19.0484	0	89714279	89714231	89714242	-	9.87719	2.20533	-2.04611	0.159217	1.38696e-12	3.19382e-06	0.685473	1.84745e-12	9.99684e-06	0.743944	L	Lost
chr1	89723898	89724117	29.5683	11.0976	22.9024	8.58782	15.2461	0	89724009	89723919	89723930	-	7.42105	2.4816	-1.44948	1.03213	1.88911e-11	0.00377331	0.0265389	2.33646e-11	0.00608495	0.041149	L	Lost
chr1	89752599	89753179	79.5583	50.7515	50.3947	28.5614	51.6962	15.8251	89752907	89752918	89752929	-	17.0877	3.44755	-0.649628	2.79792	3.2568e-29	0.0652073	1.21391e-17	1.94189e-28	0.0845082	9.89706e-17	BS	Book
chr1	89862975	89864128	84.9578	147.439	31.6586	50.9505	30.4078	41.6953	89863481	89863484	89863495	-	16.3333	2.55075	0.792314	3.34306	7.23966e-17	0.0257022	2.04395e-28	1.39005e-16	0.0357703	5.67573e-27	BM	Book
chr1	89971042	89971459	22.5308	38.5954	9.17044	22.3839	5.4599	14.3166	89971287	89971246	89971257	+	7.10526	2.52544	0.773204	3.29864	4.48939e-10	0.0771264	7.55959e-17	5.1372e-10	0.0985811	5.67396e-16	BM	Book
chr1	90112601	90112966	45.8617	87.2249	24.6068	47.6704	13.7912	13.2324	90112874	90112867	90112878	-	9.92982	0.986133	0.925613	1.91175	0.000804603	0.00856032	2.0891e-11	0.000807458	0.0129614	8.88228e-11	BM	Book
chr1	90116930	90117233	71.15	24.4116	41.1958	13.0258	28.629	0	90117049	90117116	90117127	-	12.5614	1.93085	-1.5504	0.380458	7.16938e-12	5.76622e-05	0.264026	9.1001e-12	0.000131073	0.331724	L	Lost
chr1	90219548	90220168	82.8628	81.5447	41.2433	28.0845	39.3801	14.1183	90219792	90219762	90219773	+	12.3158	2.1797	-0.0371974	2.1425	5.06159e-14	0.915162	5.33548e-13	7.54701e-14	0.925858	2.65857e-12	BS	Book
chr1	90228748	90229486	87.924	117.431	32.0681	36.5626	26.9657	26.7947	90229118	90229135	90229146	+	17.9123	2.36679	0.412163	2.77895	5.72111e-19	0.184897	2.02937e-25	1.3383e-18	0.220075	3.9805e-24	BS	Book
chr1	90342598	90343155	47.0523	53.3608	14.1462	21.907	10.3424	17.3428	90342764	90342875	90342886	+	12.3158	1.99802	0.171684	2.16971	2.95831e-11	0.629979	1.64275e-12	3.61707e-11	0.666202	7.80175e-12	BS	Book
chr1	90355616	90356070	56.2322	18.91	22.0502	7.91191	10.9183	0	90355843	90355947	90355958	-	8.85965	2.00995	-1.56341	0.446542	5.02274e-10	0.000382151	0.251225	5.7334e-10	0.000738469	0.317533	L	Lost
chr1	90356172	90356485	60.351	20.6495	34.5488	11.8679	23.1702	0	90356283	90356163	90356174	-	6.33333	2.41166	-1.5609	0.850768	5.08219e-13	0.000422586	0.0308112	7.00264e-13	0.000808731	0.0472507	L	Lost
chr1	90360599	90361818	213.682	84.8146	54.0993	19.5859	46.5658	8.55083	90361465	90360727	90360738	+	13.7544	2.64618	-1.33652	1.30966	8.23942e-21	0.000170083	1.28028e-05	2.29302e-20	0.000351744	3.0342e-05	L	Lost
chr1	90362509	90363907	355.334	53.4551	162.511	10.2278	112.831	0	90363482	90362731	90362742	+	10.2982	2.86738	-2.73849	0.128884	1.03646e-34	2.92761e-18	0.636547	9.90435e-34	2.8629e-16	0.701024	L	Lost
chr1	90378377	90378831	55.8274	37.5319	28.7209	13.0258	20.0416	3.59789	90378557	90378532	90378543	+	17.8772	1.80288	-0.569958	1.23292	2.73352e-10	0.114576	7.97989e-05	3.1623e-10	0.14193	0.000173145	L	Lost
chr1	90471674	90472144	59.1082	15.9233	24.5594	5.59598	21.1585	0	90471938	90471926	90471937	+	15.1404	2.61712	-1.92858	0.688546	4.35451e-14	4.44094e-05	0.106452	6.53899e-14	0.00010362	0.147294	L	Lost
chr1	90480048	90480919	160.769	14.9592	65.3457	5.88929	68.818	0	90480343	90480377	90480388	-	10.2982	3.09149	-3.48116	-0.389672	4.39545e-28	6.24498e-16	0.323836	2.37124e-27	3.11176e-14	0.396677	L	Lost
chr1	90509589	90509929	69.9452	6.75395	47.4475	2.79799	39.3508	0	90509688	0	0	0	0	2.28179	-3.37276	-1.09097	8.45788e-15	1.90622e-10	0.0286439	1.3486e-14	2.05596e-09	0.0441785	L	Lost
chr1	90520965	90521348	50.7995	10.2278	23.3166	5.30776	12.3867	0	90521176	90521166	90521177	-	0.157895	2.16039	-2.32251	-0.162126	1.76782e-12	1.03122e-06	0.712128	2.34043e-12	3.71547e-06	0.766741	L	Lost
chr1	90561092	90561695	77.5535	18.2341	31.6728	5.59598	28.9311	0	90561351	90561377	90561388	-	11.1754	3.11239	-2.07313	1.03926	6.6508e-24	6.19579e-07	0.00699305	2.45627e-23	2.37776e-06	0.0118505	L	Lost
chr1	90565483	90565670	31.6965	2.31593	27.1066	1.15796	13.1925	0	90565578	90565490	90565501	+	-0.421053	2.00478	-3.81048	-1.8057	8.98936e-08	4.16025e-06	0.0232991	9.43712e-08	1.26304e-05	0.0364841	L	Lost
chr1	90571034	90571305	35.0058	16.0177	21.2549	7.81753	12.0768	0	90571131	90571121	90571132	-	16.5614	1.92703	-1.14147	0.785564	1.67839e-08	0.0126236	0.0542692	1.79719e-08	0.0185636	0.0794957	L	Lost
chr1	90574890	90575867	168.606	231.687	64.1219	92.5428	68.1232	83.249	90575241	90575256	90575267	+	18.4737	2.94361	0.455018	3.39862	7.68146e-25	0.179134	1.53312e-32	3.09199e-24	0.213905	7.02071e-31	BS	Book
chr1	90608625	90609292	59.5272	16.4997	24.1736	5.11392	15.4299	0	90609115	90609075	90609086	-	12.7895	2.00397	-1.86077	0.143202	4.15522e-11	1.64571e-05	0.711532	5.03442e-11	4.27464e-05	0.766319	L	Lost
chr1	90696923	90697681	166.602	64.0707	59.1414	22.0957	55.3134	10.8449	90697232	90697235	90697246	+	8.05263	3.10684	-1.38613	1.72072	1.58956e-32	2.06792e-05	1.85788e-09	1.25584e-31	5.23935e-05	6.47064e-09	BA	Book
chr1	90705358	90707157	239.889	122.828	42.4813	18.3336	34.0447	9.16403	90706314	90706308	90706319	+	14.7719	2.69834	-0.966965	1.73138	1.09353e-20	0.00702498	7.67457e-09	3.00775e-20	0.010801	2.51639e-08	L	Lost
chr1	90709888	90710223	41.2195	5.40214	24.5452	2.12209	20.1718	0	90710002	90710093	90710104	+	0.175439	2.19722	-2.88439	-0.687171	3.84588e-11	6.89843e-07	0.209961	4.66946e-11	2.6143e-06	0.27063	L	Lost
chr1	90820757	90821154	45.0095	4.05542	22.1023	2.70361	14.0257	0	90820977	0	0	0	0	1.93763	-3.66721	-1.72959	4.67756e-06	1.2619e-06	0.0137439	4.76175e-06	4.42311e-06	0.0223123	L	Lost
chr1	90853704	90854360	71.6022	22.7665	24.1356	7.42985	21.0637	0	90853825	90853872	90853883	-	10.0351	2.14186	-1.62567	0.516194	8.60349e-13	6.11901e-05	0.150326	1.16386e-12	0.000138212	0.200962	L	Lost
chr1	90877416	90877838	25.4164	45.8365	10.0132	21.6187	6.80307	15.9964	90877746	90877613	90877624	+	17.9123	1.49955	0.835163	2.33471	1.12458e-05	0.0341378	1.45384e-12	1.14011e-05	0.0465124	6.94051e-12	BM	Book
chr1	90921417	90922286	315.371	111.925	151.698	32.0353	150.127	17.7762	90921914	90921939	90921950	+	16.3333	3.76235	-1.49614	2.26621	2.16723e-60	7.86349e-08	3.46724e-20	1.66759e-58	3.91651e-07	3.7244e-19	BA	Book
chr1	90964832	90965617	105.313	67.4451	31.2443	18.7213	27.3248	10.9833	90965250	90965197	90965208	-	15.7018	2.48549	-0.645773	1.83971	6.68195e-18	0.0683071	1.50926e-09	1.40989e-17	0.0881318	5.30601e-09	BS	Book
chr1	90998885	90999310	57.5271	14.5715	33.7725	7.33547	20.4155	0	90999006	90998975	90998986	+	3.5614	2.12818	-2.01187	0.116311	1.07312e-11	8.20057e-06	0.775292	1.34738e-11	2.30757e-05	0.820279	L	Lost
chr1	91087669	91088174	79.0919	30.3009	39.1151	12.4443	32.387	4.30978	91087790	91087794	91087805	+	0.22807	2.43521	-1.40662	1.02858	3.26624e-16	0.000292217	0.00274091	5.90671e-16	0.000576367	0.00492181	L	Lost
chr1	91088565	91088974	48.3187	32.7062	22.0644	14.6659	12.6696	4.98226	91088704	91088673	91088684	-	16.3333	1.81828	-0.553773	1.2645	4.27378e-09	0.156297	0.000181119	4.67451e-09	0.188775	0.000376173	L	Lost
chr1	91156707	91157003	31.2823	26.6332	20.4311	13.5079	12.0768	5.49625	91156912	91156869	91156880	-	17.8772	2.13172	-0.249954	1.88177	1.88643e-09	0.560119	6.74454e-07	2.09553e-09	0.600275	1.82128e-06	L	Lost
chr1	91283758	91284411	47.0855	82.4986	19.1694	24.4116	14.8644	10.8053	91284023	91283978	91283989	+	17.8772	1.39252	0.80552	2.19804	4.60681e-06	0.025617	1.4818e-13	4.69044e-06	0.0356576	7.80898e-13	BM	Book
chr1	91321295	91321690	42.0907	41.975	20.8454	21.4249	11.711	13.0321	91321541	91321565	91321576	-	17.0877	1.96273	-0.0128943	1.94983	4.62791e-08	0.976323	1.38465e-07	4.89324e-08	0.979375	4.01069e-07	BS	Book
chr1	91335674	91336415	93.3187	57.5106	40.8195	25.2814	36.6896	12.387	91336061	91335996	91336007	+	16.5614	2.66009	-0.710152	1.94994	8.27485e-25	0.0241796	3.42134e-12	3.32061e-24	0.0338177	1.57376e-11	BA	Book
chr1	91362911	91363382	61.2269	20.3562	23.3404	7.04217	12.125	0	91363152	91363215	91363226	+	7.64912	2.13555	-1.56952	0.566027	6.39576e-14	6.24792e-05	0.108496	9.45446e-14	0.000140871	0.149872	L	Lost
chr1	91459088	91459646	69.1309	25.9573	27.0971	11.3858	18.999	0	91459402	91459341	91459352	-	13.7193	2.30638	-1.43158	0.874795	1.41804e-15	0.000189568	0.0106249	2.42068e-15	0.000388279	0.0175545	L	Lost
chr1	91503273	91503559	84.9151	15.0485	67.4359	9.84016	80.1852	2.89646	91503418	91503373	91503384	+	9.05263	3.87417	-2.45684	1.41734	3.47981e-31	2.35107e-08	0.000772105	2.4554e-30	1.36631e-07	0.00148618	L	Lost
chr1	91620513	91621139	89.143	28.5665	39.591	12.5438	25.8673	3.63104	91620964	91621024	91621035	-	6.08772	2.57213	-1.68022	0.891911	3.95238e-19	1.04667e-05	0.00877239	9.38729e-19	2.85872e-05	0.0146673	L	Lost
chr1	91767251	91767772	89.9336	14.8597	40.4005	7.62369	19.608	0	91767389	91767697	91767708	+	2.57895	1.90543	-2.60963	-0.704205	5.78195e-09	4.53374e-08	0.0950646	6.29589e-09	2.42121e-07	0.132925	L	Lost
chr1	91772938	91773616	152.47	30.1964	42.924	7.23601	32.3725	0	91773416	91773416	91773427	+	5.08772	3.10063	-2.32176	0.778874	4.66306e-24	9.67056e-09	0.0290488	1.74784e-23	6.30091e-08	0.0447635	L	Lost
chr1	91805338	91805741	43.705	17.3695	22.0502	6.85341	16.0462	0	91805487	91805494	91805505	+	15.5439	2.59486	-1.34864	1.24622	3.50113e-10	0.010994	0.0079638	4.02438e-10	0.0163458	0.0133952	L	Lost
chr1	91813877	91814847	137.485	86.6484	36.2628	18.7162	22.4843	8.33286	91814350	91814138	91814149	+	14.7719	2.31057	-0.66993	1.64064	4.87753e-16	0.0575799	3.57365e-08	8.68906e-16	0.0753861	1.09712e-07	L	Lost
chr1	91831365	91832509	136.934	77.7724	32.4681	19.5859	27.4587	9.99671	91832008	91831964	91831975	-	14.1579	2.33848	-0.820163	1.51832	2.72844e-12	0.0488402	1.27401e-05	3.56793e-12	0.0647972	3.02104e-05	L	Lost
chr1	91832596	91834108	207.774	96.6926	39.5293	12.6432	31.8367	4.0094	91832709	91833919	91833930	+	14.3158	1.95285	-1.11266	0.840194	4.21206e-12	0.00180416	0.00455568	5.43142e-12	0.00307764	0.00793736	L	Lost
chr1	91865338	91866166	174.849	114.633	56.6227	35.6087	46.5335	18.1007	91865653	91865697	91865708	+	8.38596	2.68182	-0.613436	2.06838	1.04232e-20	0.0814721	3.22829e-12	2.87273e-20	0.103733	1.4892e-11	BS	Book
chr1	91899622	91900534	161.846	161.812	53.2233	43.9976	67.3212	33.1877	91900112	91900102	91900113	+	18.1053	2.85364	-0.00195589	2.85168	4.34319e-22	0.995594	1.38369e-21	1.35945e-21	0.996122	1.7461e-20	BS	Book
chr1	91921678	91921990	42.9192	36.2744	20.0121	16.112	11.8402	6.24656	91921826	91921810	91921821	+	18.1053	2.19676	-0.227934	1.96882	1.99749e-12	0.543946	2.82371e-09	2.63616e-12	0.58516	9.6473e-09	L	Lost
chr1	91923416	91923723	58.2702	3.76211	37.4628	2.31593	33.3721	0	91923610	91923592	91923603	-	5.73684	2.80452	-3.89595	-1.09143	8.7984e-19	1.31701e-09	0.0789307	2.02274e-18	1.10647e-08	0.112215	L	Lost
chr1	91956490	91956994	99.0993	23.2537	31.2443	8.9755	22.6566	0	91956735	91956712	91956723	+	5.63158	2.50775	-2.09743	0.410327	1.27327e-18	9.3521e-08	0.24312	2.88694e-18	4.55818e-07	0.308381	L	Lost
chr1	92011152	92012014	168.235	35.4199	70.8638	7.81753	73.807	4.34423	92011373	92011648	92011659	+	13.5614	3.20096	-2.27869	0.922276	3.99907e-23	5.62769e-08	0.0116691	1.37613e-22	2.92263e-07	0.0191584	L	Lost
chr1	92053803	92054242	60.7984	25.7584	27.9066	9.16426	21.4727	0	92054072	92054028	92054039	-	9	2.31494	-1.22055	1.09439	4.36822e-14	0.00218434	0.00199209	6.55871e-14	0.00367046	0.00364252	L	Lost
chr1	92098863	92099802	180.62	119.265	58.2655	28.944	49.9589	19.8726	92099345	92099071	92099082	-	5.61404	2.89802	-0.601112	2.29691	1.72534e-13	0.213624	9.32005e-09	2.46053e-13	0.251044	3.03248e-08	BS	Book
chr1	92179914	92180299	50.3758	17.27	22.0549	8.9755	10.7364	0	92180103	92180111	92180122	+	13.5263	1.87001	-1.53573	0.334277	2.32546e-10	0.000210178	0.368178	2.70008e-10	0.000426375	0.443704	L	Lost
chr1	92225796	92226472	107.879	16.793	42.0528	6.46573	42.7836	0	92226032	92226088	92226099	-	17.9123	3.11592	-2.72591	0.390007	9.9863e-18	4.38379e-08	0.379514	2.07409e-17	2.35e-07	0.455344	L	Lost
chr1	92301339	92302778	767.988	203.787	273.848	55.5721	249.576	53.6489	92301880	92301889	92301900	-	10.9474	4.38059	-1.91581	2.46478	3.68513e-61	3.80796e-09	2.59992e-19	3.02047e-59	2.80112e-08	2.53006e-18	BA	Book
chr1	92308994	92309874	191.537	57.2122	46.6522	13.0208	35.8539	3.89455	92309438	92309277	92309288	+	9.2807	3.12442	-1.73747	1.38695	2.46604e-30	4.99425e-07	4.1613e-06	1.61638e-29	1.96852e-06	1.04034e-05	L	Lost
chr1	92320275	92321277	255.364	69.8656	87.0765	18.7213	61.5625	8.24316	92320803	92320840	92320851	+	11.1228	3.13537	-1.88483	1.25053	5.94198e-37	2.08958e-09	4.84604e-06	6.78657e-36	1.65784e-08	1.20302e-05	L	Lost
chr1	92328493	92328798	49.5947	6.94271	33.3203	3.56827	18.9228	0	92328584	92328683	92328694	-	4.49123	2.13792	-2.69379	-0.555869	3.88275e-12	1.63911e-07	0.247666	5.02128e-12	7.40218e-07	0.313561	L	Lost
chr1	92415417	92416350	116.231	39.7534	25.8259	10.9981	11.8267	0	92415728	92415711	92415722	-	4.92982	2.18866	-1.55256	0.636102	6.67778e-14	4.73615e-05	0.0528521	9.85761e-14	0.000109806	0.077584	L	Lost
chr1	92420974	92421603	88.2244	18.7213	32.0776	5.30776	24.1903	0	92421351	92421048	92421059	+	15.3333	2.44544	-2.26842	0.177017	8.10259e-17	5.31725e-08	0.637472	1.5489e-16	2.78399e-07	0.701861	L	Lost
chr1	92424193	92425230	515.181	45.4336	263.835	17.2649	254.326	10.3536	92424772	92424838	92424849	-	10.0877	4.39212	-3.48116	0.91096	1.14379e-47	7.19672e-19	0.00746085	3.19441e-46	8.05961e-17	0.0125936	L	Lost
chr1	92441391	92441683	33.2776	6.36627	20.3837	4.24418	13.4627	0	92441510	92441602	92441613	+	0.666667	2.24155	-2.32301	-0.08146	9.39534e-10	5.11919e-05	0.878825	1.0584e-09	0.000117713	0.905427	L	Lost
chr1	92782623	92782994	72.4734	21.708	46.6617	12.5438	42.4398	2.63934	92782832	92782864	92782875	-	17.9123	2.92352	-1.73128	1.19224	6.28232e-20	3.51656e-05	0.0017287	1.60236e-19	8.41578e-05	0.00318665	L	Lost
chr1	92797927	92798441	62.8934	14.3776	27.0591	6.94779	17.1423	0	92798041	92798357	92798368	+	10.1579	2.00324	-2.15028	-0.147032	9.4355e-13	3.6045e-07	0.702705	1.2722e-12	1.47702e-06	0.758714	L	Lost
chr1	92940414	92940987	81.5774	42.7503	27.4829	14.5766	18.0117	5.76814	92940732	92940719	92940730	-	15.5614	2.15637	-0.951343	1.20502	2.96577e-12	0.0150768	0.00033999	3.86785e-12	0.0218811	0.000683668	L	Lost
chr1	92950268	92950797	94.1377	125.338	35.8106	51.7207	25.2078	36.1231	92950470	92950366	92950377	+	6.33333	2.36982	0.411537	2.78136	3.32073e-13	0.290028	1.46563e-17	4.63732e-13	0.331792	1.18469e-16	BS	Book
chr1	93019673	93020221	45.8095	63.7774	17.9266	25.7634	12.3077	15.8544	93020046	93020021	93020032	-	13.0175	2.23803	0.475989	2.71402	5.90993e-13	0.182628	2.28574e-18	8.0968e-13	0.217649	2.00626e-17	BS	Book
chr1	93234698	93235634	87.8386	38.5904	24.5357	10.6104	21.7608	4.20002	93235054	93235557	93235568	+	15.1053	2.26533	-1.17774	1.08759	2.01627e-11	0.00614805	0.00308168	2.48911e-11	0.00954747	0.00549447	L	Lost
chr1	93309978	93310639	91.2807	73.2349	26.6781	20.9377	14.1744	9.5304	93310300	93310253	93310264	+	5.10526	2.17432	-0.320733	1.85358	1.16282e-13	0.371212	1.14928e-09	1.68207e-13	0.415447	4.09346e-09	L	Lost
chr1	93316750	93317356	64.5457	20.749	22.8787	6.17751	16.4956	0	93316943	93316918	93316929	-	16.1228	1.72957	-1.68171	0.0478626	3.61791e-10	1.77871e-05	0.890809	4.15595e-10	4.57736e-05	0.915246	L	Lost
chr1	93362419	93363233	82.915	107.104	22.9024	25.0875	12.7012	9.62234	93362627	93362642	93362653	+	17.0877	2.0244	0.364765	2.38916	3.21325e-16	0.213024	9.86812e-22	5.81397e-16	0.250409	1.26504e-20	L	Lost
chr1	93497444	93497788	44.5098	5.69036	20.3932	2.79799	20.0604	0	93497568	93497554	93497565	+	5.57895	2.38408	-2.8864	-0.50232	1.24316e-08	8.65179e-06	0.397379	1.33646e-08	2.4173e-05	0.473483	L	Lost
chr1	93507581	93508436	85.7863	32.1246	21.6786	8.29451	12.9868	0	93508107	93508016	93508027	+	8.14035	2.10621	-1.39793	0.708275	3.87876e-12	0.000434414	0.0396854	5.01651e-12	0.00082917	0.0597208	L	Lost
chr1	93561388	93561674	57.9177	5.30776	42.1002	4.34364	43.8135	0	93561506	93561573	93561584	-	10.2456	3.41763	-3.50335	-0.0857193	3.28955e-24	2.46974e-09	0.881182	1.25069e-23	1.91775e-08	0.907581	L	Lost
chr1	93582478	93582993	67.4407	69.3733	27.9208	35.7974	17.64	22.6882	93582722	93582661	93582672	+	16.1579	2.40572	0.0396477	2.44537	3.96832e-16	0.909575	6.84729e-16	7.12508e-16	0.921249	4.6101e-15	BS	Book
chr1	93698711	93699201	66.5932	61.2727	32.8823	28.1738	32.8374	22.426	93698882	93698896	93698907	+	7.17544	2.66454	-0.124185	2.54036	9.78117e-11	0.801988	1.4319e-09	1.15897e-10	0.824912	5.04766e-09	BS	Book
chr1	93776772	93777275	41.2243	72.2759	15.8222	29.143	8.7811	13.8036	93777065	93777058	93777069	+	3.68421	1.49464	0.799058	2.2937	7.12372e-07	0.0239244	6.28444e-15	7.32913e-07	0.0334875	3.8128e-14	BM	Book
chr1	93890478	93890881	53.2803	17.0813	25.3784	6.65957	24.1274	0	93890643	93890747	93890758	+	13.2456	2.58264	-1.68018	0.902456	5.55949e-16	0.000100821	0.0226155	9.85735e-16	0.000218326	0.0354971	L	Lost
chr1	94015890	94016489	352.792	28.944	208.669	11.8679	202.017	4.06137	94016153	94016172	94016183	+	9.64912	4.2503	-3.59905	0.651249	1.86235e-67	4.12697e-26	0.0377919	2.37575e-65	3.59078e-23	0.0570993	L	Lost
chr1	94039175	94039651	64.503	20.068	31.2159	9.25864	29.1455	3.43335	94039317	94039294	94039305	+	16.1228	2.56353	-1.67748	0.886055	3.33543e-16	6.6244e-05	0.0195858	6.02701e-16	0.000148413	0.0310636	L	Lost
chr1	94220824	94221768	126.182	22.866	33.3156	6.56011	22.7107	0	94221404	94221422	94221433	+	5.61404	2.32463	-2.45837	-0.133742	7.70778e-14	1.10384e-08	0.722329	1.13219e-13	7.07129e-08	0.775314	L	Lost
chr1	94243711	94245302	291.141	130.641	59.5842	24.024	45.7969	12.846	94244897	94244865	94244876	+	11.0702	2.61873	-1.15629	1.46244	3.5895e-25	0.000248246	3.27638e-08	1.49067e-24	0.000496684	1.01015e-07	BA	Book
chr1	94256693	94256959	45.4095	20.4557	28.7493	9.26372	16.8199	0	94256798	0	0	0	0	2.29288	-1.15881	1.13406	2.72457e-14	0.00343978	0.00165384	4.16473e-14	0.00558426	0.00305558	L	Lost
chr1	94257074	94257837	87.8765	68.5138	27.9161	19.1039	15.0019	5.30943	94257221	94257709	94257720	+	15.1754	1.6252	-0.373506	1.25169	2.13236e-10	0.243565	3.72678e-06	2.4814e-10	0.28321	9.36054e-06	L	Lost
chr1	94334119	94334497	50.7995	13.4135	26.2306	5.59598	14.2181	0	94334318	94334326	94334337	-	2.31579	2.04431	-1.95258	0.0917212	5.12568e-10	3.64776e-05	0.829471	5.84873e-10	8.69702e-05	0.86506	L	Lost
chr1	94537494	94538043	73.2876	32.7112	31.2301	11.2914	21.7122	0	94537755	94537780	94537791	+	15.5614	2.33729	-1.17618	1.16111	2.57086e-15	0.00196937	0.000526834	4.28957e-15	0.00333849	0.00103497	L	Lost
chr1	94611741	94612355	87.7389	44.2909	37.4296	17.0813	35.5318	5.95771	94612130	94612127	94612138	+	9.73684	2.28911	-0.995537	1.29357	4.22531e-12	0.0167365	0.00027437	5.44747e-12	0.0240889	0.000558433	L	Lost
chr1	94753257	94754177	73.626	99.9727	18.7172	24.9932	16.0585	13.6791	94753824	94753846	94753857	+	15.7895	1.88077	0.43334	2.31411	3.13446e-09	0.256572	3.36174e-13	3.4505e-09	0.29697	1.70744e-12	BS	Book
chr1	94785571	94786244	104.132	17.1756	32.1013	5.01954	22.2019	0	94786003	94785995	94786006	-	8.49123	2.39918	-2.61523	-0.216049	2.92925e-18	1.52731e-10	0.559646	6.39958e-18	1.69422e-09	0.63106	L	Lost
chr1	94799125	94799560	102.894	32.0353	47.9045	13.1202	31.371	4.48711	94799386	94799407	94799418	+	7.63158	2.54674	-1.69092	0.855819	5.36976e-13	0.000206972	0.0289979	7.38568e-13	0.000420373	0.0446942	L	Lost
chr1	94926457	94926915	45.019	51.1341	18.7599	24.3122	8.49777	15.5168	94926788	94926820	94926831	-	18.1053	2.19444	0.189733	2.38417	8.67305e-12	0.615239	3.3944e-13	1.09459e-11	0.652322	1.72344e-12	BM	Book
chr1	95021238	95021622	48.7472	23.4424	31.2491	9.3581	20.0416	0	95021514	95021507	95021518	+	10.2456	2.16998	-1.03284	1.13715	6.05005e-12	0.0114047	0.00172062	7.71703e-12	0.016909	0.00317296	L	Lost
chr1	95110832	95111628	146.552	58.3701	52.0375	18.0403	41.3975	5.69425	95111417	95111150	95111161	-	9.80702	2.4358	-1.32367	1.11213	7.54267e-16	0.000549539	0.00062882	1.32033e-15	0.00102668	0.00122307	L	Lost
chr1	95113615	95114419	109.879	102.467	37.0391	24.5111	33.717	14.4132	95114183	95114123	95114134	+	12.5614	2.67993	-0.101027	2.57891	4.39907e-18	0.785059	2.84904e-16	9.44291e-18	0.809733	2.00866e-15	BS	Book
chr1	95124190	95124704	71.1405	24.5111	34.1156	8.10575	22.5601	0	95124386	95124645	95124656	-	6.59649	2.0821	-1.55657	0.525527	1.44135e-08	0.0012491	0.205151	1.54644e-08	0.00219263	0.265105	L	Lost
chr1	95168648	95169328	118.321	35.5041	54.5467	11.8679	44.5543	4.45458	95168990	95168983	95168994	-	7.98246	2.99989	-1.72761	1.27228	3.32343e-27	1.40522e-06	7.42073e-05	1.66211e-26	4.86118e-06	0.000161602	L	Lost
chr1	95172162	95172542	84.5436	11.0976	49.1377	4.43802	37.0077	0	95172293	95172312	95172323	+	12.5614	2.58819	-2.96649	-0.378294	2.74245e-18	2.1764e-10	0.381748	6.00501e-18	2.3122e-09	0.457572	L	Lost
chr1	95350229	95350897	79.1678	42.6458	21.6691	15.63	19.6767	7.05888	95350567	95350696	95350707	-	13.7193	2.86006	-0.890917	1.96914	1.92223e-21	0.0151921	1.88485e-09	5.67092e-21	0.0220334	6.56254e-09	L	Lost
chr1	95353152	95353853	73.3066	26.2455	26.7018	10.2278	27.7042	0	95353403	95353409	95353420	+	9.66667	2.40974	-1.49243	0.917311	9.3796e-18	6.42898e-05	0.00626107	1.9543e-17	0.000144512	0.0106853	L	Lost
chr1	95461778	95462456	64.1409	47.8642	26.2401	15.3418	19.6455	7.88392	95462212	95462225	95462236	-	17.3158	2.5168	-0.439784	2.07701	5.20785e-16	0.240397	2.66995e-10	9.25758e-16	0.279852	1.01116e-09	L	Lost
chr1	95473721	95474136	59.1984	9.3581	27.5303	4.8257	17.7844	0	95473820	95473963	95473974	-	2.45614	2.07518	-2.63838	-0.563197	1.8996e-11	8.39578e-08	0.213693	2.34901e-11	4.14753e-07	0.274929	L	Lost
chr1	95500604	95501243	83.734	23.2537	28.7398	7.23601	18.0475	0	95500740	95500707	95500718	+	16.9298	2.14017	-1.85318	0.286995	1.21711e-10	3.44349e-05	0.460993	1.43483e-10	8.2543e-05	0.536505	L	Lost
chr1	95507395	95508075	77.8918	38.5954	30.8206	13.7017	25.5365	4.95446	95507843	95507808	95507819	-	17.8772	3.00145	-1.01806	1.98339	1.61119e-23	0.0054513	2.24062e-09	5.7429e-23	0.00854269	7.75036e-09	L	Lost
chr1	95564593	95565150	87.9003	23.2537	33.344	7.52423	17.9367	0	95564833	95564851	95564862	+	10.2982	2.17989	-1.92455	0.255346	2.6998e-15	5.52599e-07	0.456216	4.49653e-15	2.14866e-06	0.531784	L	Lost
chr1	95569177	95569757	81.1821	14.472	40.4005	5.98367	29.6502	0	95569448	95569462	95569473	+	17.8772	2.67927	-2.47758	0.201689	3.03158e-21	3.47199e-09	0.603301	8.77661e-21	2.58197e-08	0.671515	L	Lost
chr1	95601971	95602714	110.708	14.7602	40.7579	4.1498	31.9487	0	95602123	95602483	95602494	+	6.45614	2.32429	-2.88059	-0.556297	5.97282e-17	1.10159e-11	0.148297	1.15676e-16	1.70298e-10	0.198524	L	Lost
chr1	95622303	95622578	50.0137	21.1316	27.9019	12.0617	15.607	2.99499	95622441	95622454	95622465	+	12.3158	2.50638	-1.25371	1.25267	3.03147e-14	0.00329694	0.00113532	4.61328e-14	0.00536932	0.00214146	L	Lost
chr1	95623738	95624155	57.4844	10.7099	29.1588	6.07804	12.9507	0	95623814	95624058	95624069	-	5.12281	1.77168	-2.42561	-0.653937	1.36478e-06	7.1622e-06	0.172958	1.3979e-06	2.04454e-05	0.22778	L	Lost
chr1	95628063	95628694	100.361	18.5224	44.5762	8.20013	40.8598	0	95628479	95628478	95628489	+	10.7719	3.36164	-2.41288	0.948759	4.81891e-26	1.96822e-08	0.0162269	2.16468e-25	1.17377e-07	0.0260393	L	Lost
chr1	95631260	95631823	61.2174	42.9391	24.9879	18.5274	16.4956	6.76662	95631370	95631403	95631414	+	14.3158	2.09133	-0.519091	1.57224	5.98782e-10	0.215029	1.10375e-05	6.80982e-10	0.252573	2.63534e-05	L	Lost
chr1	95634311	95634998	195.285	82.3048	100.347	36.2795	97.8335	23.7632	95634482	95634482	95634493	-	13.7193	3.60609	-1.24944	2.35665	3.87551e-37	0.000262803	4.48397e-15	4.48831e-36	0.000522817	2.76394e-14	BA	Book
chr1	95643813	95644165	42.8718	5.40214	26.2496	2.79799	21.5441	0	95644023	95643953	95643964	-	11.2807	3.23647	-2.94197	0.294507	1.19797e-18	5.72591e-07	0.605855	2.72221e-18	2.21573e-06	0.673733	L	Lost
chr1	95692509	95693044	63.3266	39.2764	26.6971	13.3191	19.2986	10.0561	95692689	95692654	95692665	+	13.7193	2.34022	-0.708848	1.63137	1.02166e-12	0.0816779	3.9173e-06	1.37397e-12	0.10396	9.82161e-06	BS	Book
chr1	95700983	95701488	44.9668	68.8913	21.2311	24.3122	11.5539	17.2305	95701328	95701120	95701131	-	7.49123	1.40011	0.614335	2.01445	8.03729e-05	0.151551	1.08995e-08	8.10007e-05	0.183414	3.52408e-08	BS	Book
chr1	95930975	95931981	190.046	66.7692	57.9366	15.7294	41.1995	4.09103	95931530	95931562	95931573	-	9.92982	2.65927	-1.51127	1.148	1.28314e-23	7.61109e-06	7.35267e-05	4.61092e-23	2.1587e-05	0.000160212	L	Lost
chr1	95977486	95979016	513.285	529.443	135.653	111.065	119.259	93.7976	95978090	95978100	95978111	+	16.5263	3.52021	0.0435251	3.56374	1.37893e-55	0.871146	2.72547e-56	7.33404e-54	0.887519	1.84966e-53	BS	Book
chr1	96195041	96195299	32.5298	5.01446	20.4453	3.56827	18.8514	0	96195180	96195240	96195251	-	4.19298	2.46893	-2.56325	-0.0943251	9.62484e-12	1.63264e-05	0.867333	1.21174e-11	4.24459e-05	0.896255	L	Lost
chr1	96792044	96792746	105.055	13.3141	52.1419	4.92008	70.0679	0	96792222	96792658	96792669	-	7.63158	4.08993	-2.96711	1.12282	3.1792e-35	5.98704e-11	0.00979377	3.16085e-34	7.52716e-10	0.0162669	L	Lost
chr1	96859857	96860354	25.4211	75.8289	10.0037	30.0969	5.4599	29.7348	96860064	96860150	96860161	+	18.1053	2.57619	1.58474	4.16092	1.85067e-11	6.81027e-05	4.13619e-31	2.29009e-11	0.000152205	1.60771e-29	BM	Book
chr1	97169912	97170270	35.3963	6.07804	24.1641	3.28005	19.6297	0	97170064	97169980	97169991	-	2.80702	3.15255	-2.5224	0.63015	2.15108e-15	2.06302e-05	0.268977	3.61225e-15	5.22999e-05	0.337245	L	Lost
chr1	97501067	97501403	40.0005	46.8007	22.0691	26.6332	18.8833	16.0663	97501252	97501227	97501238	+	15.3333	3.04908	0.213465	3.26255	2.96475e-18	0.574861	4.63129e-20	6.47213e-18	0.614348	4.90645e-19	BS	Book
chr1	98379439	98379807	64.5125	10.1335	38.3245	5.01954	41.8082	0	98379578	98379588	98379599	-	0.385965	3.40424	-2.72848	0.675761	2.57006e-24	2.54846e-08	0.149519	9.86424e-24	1.46671e-07	0.199978	L	Lost
chr1	98409446	98410230	59.9557	121.581	21.2501	41.2991	18.488	36.6207	98409731	98409851	98409862	-	18.1053	3.43872	1.01506	4.45377	2.05486e-25	0.00327094	3.13889e-43	8.73124e-25	0.00532953	5.04796e-41	BM	Book
chr1	98643123	98643657	84.9626	18.91	49.1283	7.04217	53.9617	0	98643469	98643427	98643438	+	14.1579	3.51461	-2.15782	1.35679	1.45973e-30	8.72247e-08	0.00037677	9.77175e-30	4.29142e-07	0.000753251	L	Lost
chr1	98771257	98771606	54.9847	10.3222	35.8153	7.52423	27.3929	0	98771428	98771449	98771460	-	-0.298246	2.96668	-2.38004	0.586645	1.93066e-17	1.95852e-06	0.209065	3.91029e-17	6.50086e-06	0.26966	L	Lost
chr1	99358894	99359274	33.2919	17.5633	21.2454	9.74578	16.9261	4.0795	99359140	99359132	99359143	+	17.9123	3.41277	-0.952479	2.46029	7.19496e-17	0.0441159	8.07557e-08	1.38235e-16	0.0590014	2.38971e-07	L	Lost
chr1	99448837	99450146	175.829	341.868	60.4174	101.697	70.8926	106.824	99449537	99449496	99449507	-	17.9123	3.07166	0.957403	4.02906	7.18505e-37	0.000562076	1.19342e-63	8.16785e-36	0.00104831	1.76071e-60	BM	Book
chr1	99530624	99531652	122.383	56.0593	22.4739	14.4771	18.2773	6.46406	99531192	99530820	99530831	+	14.3158	2.63405	-1.12973	1.50433	4.00424e-24	0.000539103	1.4519e-07	1.51024e-23	0.00100915	4.19725e-07	L	Lost
chr1	99592888	99593401	49.2231	16.7879	22.9736	6.65957	31.847	0	99593225	99593214	99593225	+	8.17544	2.94952	-1.54708	1.40244	7.72755e-17	0.000711453	0.000889068	1.47987e-16	0.00130503	0.00169922	L	Lost
chr1	99657094	99657482	58.275	17.1756	32.0396	9.84524	34.1136	0	99657219	99657197	99657208	-	2.80702	2.84237	-1.77763	1.06474	1.90748e-19	2.709e-05	0.0066904	4.6529e-19	6.65638e-05	0.0113649	L	Lost
chr1	99690733	99691787	115.812	35.8918	43.7715	8.48835	45.805	4.26944	99690925	99690889	99690900	-	13.7895	2.61246	-1.68772	0.924737	6.79436e-24	7.95826e-07	0.00239651	2.50628e-23	2.9591e-06	0.00433317	L	Lost
chr1	99876025	99876463	50.0089	9.64632	22.0881	3.76211	19.6297	0	99876193	99876272	99876283	+	5.77193	2.89826	-2.32475	0.573511	9.95726e-18	2.34466e-06	0.216452	2.06831e-17	7.62447e-06	0.278068	L	Lost
chr1	99933144	99933741	66.1884	37.7257	24.9689	15.0535	23.7839	8.75627	99933278	99933444	99933455	+	12.9123	2.93299	-0.811557	2.12144	8.97133e-20	0.0368579	1.3259e-09	2.25583e-19	0.049954	4.68924e-09	L	Lost
chr1	99969617	99970239	200.75	20.5501	100.427	7.23601	101.47	0	99969897	99969952	99969963	+	5.7193	3.98211	-3.27865	0.703466	1.77965e-38	6.51336e-15	0.0668695	2.32892e-37	2.51442e-13	0.0963558	L	Lost
chr1	99983098	99983373	42.0813	5.78982	27.5113	3.95596	23.0485	0	99983249	0	0	0	0	2.62577	-2.89321	-0.267437	2.35151e-13	1.10301e-06	0.634229	3.31907e-13	3.93819e-06	0.699061	L	Lost
chr1	101292121	101293067	243.817	58.6685	96.7134	17.4639	125.191	5.99119	101292563	101292673	101292684	+	13.7193	4.24527	-2.06394	2.18133	3.09579e-47	8.95843e-09	1.18093e-11	8.42418e-46	5.89921e-08	5.13619e-11	L	Lost
chr1	101614007	101614827	61.2222	88.1788	23.7499	29.7143	24.9796	26.0441	101614372	101614359	101614370	-	18.1053	3.16828	0.531225	3.6995	4.11227e-18	0.196	3.20192e-24	8.8508e-18	0.232224	5.4791e-23	BS	Book
chr1	102401708	102402025	34.1678	5.78982	22.9451	5.11392	21.9625	0	102401863	102401900	102401911	+	2.40351	3.81003	-2.59329	1.21674	3.47765e-20	1.04621e-05	0.040896	9.1213e-20	2.85767e-05	0.0613766	L	Lost
chr1	102683908	102684952	122.044	33.9636	35.8248	7.91191	36.4355	0	102684559	102684534	102684545	-	9.87719	3.05097	-1.84854	1.20243	1.16056e-22	3.94538e-06	0.000673538	3.82604e-22	1.20405e-05	0.0013062	L	Lost
chr1	102774615	102775272	143.304	14.8597	56.2512	5.5016	54.8504	0	102774854	102775177	102775188	-	7.54386	3.43684	-3.28302	0.153828	3.3212e-30	9.58543e-14	0.704904	2.15196e-29	2.66827e-12	0.760557	L	Lost
chr1	103525028	103525406	64.5314	2.60415	37.8913	2.12209	37.6005	0	103525184	0	0	0	0	3.70211	-4.53065	-0.828533	5.28492e-28	5.32424e-10	0.251089	2.83441e-27	5.05505e-09	0.317421	L	Lost
chr1	103653201	103653993	252.507	28.5564	153.393	10.2278	105.736	6.35078	103653876	103653382	103653393	+	12.4561	5.20328	-3.12834	2.07495	2.33751e-63	2.3823e-16	1.38351e-08	2.24064e-61	1.33618e-14	4.43019e-08	L	Lost
chr1	104465424	104466225	31.2443	77.9561	7.49921	20.068	3.11675	14.8092	104465735	104465956	104465967	-	14.5789	2.08194	1.32215	3.40409	1.01315e-08	0.00112148	7.54609e-23	1.09255e-08	0.00198494	1.08547e-21	BM	Book
chr1	104990437	104991067	184.628	10.034	97.485	4.92008	113.361	0	104990702	104991021	104991032	-	6.08772	4.91138	-4.19187	0.719503	1.58649e-55	3.38257e-19	0.1165	8.41162e-54	4.09931e-17	0.159809	L	Lost
chr1	105166712	105167455	49.1377	85.4854	15.8079	27.8805	13.972	29.6891	105167119	105167038	105167049	-	16.5614	2.21619	0.798886	3.01508	2.63237e-14	0.0149512	3.26276e-26	4.02832e-14	0.0217128	7.01617e-25	BM	Book
chr1	105368083	105368579	57.456	10.1284	32.5108	6.36627	30.5688	0	105368350	105368312	105368323	+	8.85965	3.28535	-2.45802	0.827325	5.16391e-17	5.51616e-06	0.0992372	1.00618e-16	1.6206e-05	0.138218	L	Lost
chr1	105636909	105637160	47.076	2.50977	41.248	2.50977	39.1822	0	105637047	0	0	0	0	4.62181	-4.36925	0.252553	2.99606e-26	6.94437e-08	0.760672	1.37274e-25	3.51339e-07	0.807985	L	Lost
chr1	106436545	106437364	87.8955	169.137	36.277	67.5395	42.487	63.1423	106436872	106436825	106436836	-	18.1053	3.21637	0.944524	4.16089	2.04145e-21	0.0138215	1.49965e-35	6.00855e-21	0.020187	9.90032e-34	BM	Book
chr1	106663887	106665079	115.764	84.7151	24.1356	16.7879	23.2476	8.88614	106664699	106664596	106664607	+	17.9123	2.41965	-0.45219	1.96746	1.3599e-23	0.123962	1.21552e-14	4.87795e-23	0.152544	7.16703e-14	L	Lost
chr1	106883931	106884444	137.41	42.0693	85.4053	16.9818	90.4859	9.08774	106884251	106884200	106884211	-	13.0702	4.24966	-1.71262	2.53704	5.77e-39	8.78407e-06	1.35247e-12	7.93007e-38	2.45063e-05	6.47025e-12	L	Lost
chr1	106908525	106910267	350.273	78.632	127.053	24.024	144.414	19.9802	106910117	106910164	106910175	+	13.8947	3.55444	-2.1523	1.40214	4.22886e-38	5.73636e-10	2.46497e-06	5.34443e-37	5.398e-09	6.30418e-06	BA	Book
chr1	106967198	106967557	39.172	7.23601	22.9356	4.1498	16.8238	0	106967438	106967511	106967522	+	8.24561	2.22499	-2.42445	-0.199462	4.06156e-11	6.78085e-06	0.691761	4.9241e-11	1.94633e-05	0.74945	L	Lost
chr1	106967633	106968229	76.2158	8.39397	33.7251	2.79799	23.253	0	106967786	106967936	106967947	-	2.31579	3.38527	-3.17683	0.208438	3.21138e-25	4.18277e-10	0.667311	1.33905e-24	4.11283e-09	0.728145	L	Lost
chr1	106991282	106992071	233.694	32.6118	120.43	12.2556	134.807	4.87317	106991853	106991333	106991344	+	8.26316	4.19002	-2.84076	1.34926	1.83423e-34	8.63769e-11	0.000494827	1.71179e-33	1.03606e-09	0.00097452	L	Lost
chr1	107241059	107241433	53.7704	4.92008	27.5113	3.76211	26.3907	0	107241159	107241198	107241209	+	3.89474	2.873	-3.41448	-0.541483	5.97423e-20	4.27357e-09	0.335357	1.52722e-19	3.10259e-08	0.408915	L	Lost
chr1	107243704	107244490	57.0465	76.4206	15.4174	21.3254	11.4963	11.1341	107244105	107244120	107244131	+	17.9123	2.18413	0.416079	2.60021	1.43708e-14	0.206634	6.84275e-20	2.2469e-14	0.243614	7.10294e-19	BS	Book
chr1	107259285	107260185	231.699	162.855	121.282	54.8861	105.853	67.7469	107259561	107260044	107260055	+	2.10526	3.53361	-0.50441	3.0292	1.69796e-50	0.0686005	2.09422e-35	5.81989e-49	0.0884699	1.36398e-33	BS	Book
chr1	107322907	107323168	29.5731	5.78982	22.9214	2.31593	14.7383	0	107323058	107322972	107322983	-	3.35088	2.21807	-2.38635	-0.168282	1.23527e-10	3.34267e-05	0.757733	1.45594e-10	8.0376e-05	0.805518	L	Lost
chr1	107347775	107348369	62.008	30.9768	22.0834	12.3499	16.99	4.64491	107348065	107347982	107347993	+	15.7018	2.95493	-1.0204	1.93453	5.00227e-16	0.0222691	1.11253e-06	8.90472e-16	0.0313226	2.94358e-06	L	Lost
chr1	107387864	107389072	225.762	147.911	75.0063	37.7257	93.2002	35.9308	107388328	107388332	107388343	-	17.8772	4.04139	-0.609944	3.43144	9.61797e-52	0.047306	9.35325e-36	3.64248e-50	0.0629183	6.27241e-34	BS	Book
chr1	107419885	107420529	102.828	14.3726	37.4486	5.40214	44.3142	2.37046	107420234	107420150	107420161	-	11.6316	3.45572	-2.79354	0.662174	5.06047e-25	1.92223e-09	0.122065	2.06813e-24	1.53983e-08	0.166735	L	Lost
chr1	107576230	107577365	97.8518	170.881	28.3351	62.1373	28.3222	59.1868	107576841	107576801	107576812	-	18.1053	2.95105	0.80234	3.75339	2.03612e-26	0.0103173	1.15282e-42	9.45295e-26	0.0154106	1.74638e-40	BM	Book
chr1	107609343	107610199	152.974	50.2695	62.9788	18.5274	82.4994	8.29144	107609644	107609638	107609649	-	13.9474	3.75859	-1.6075	2.15109	2.87739e-45	6.49101e-07	5.47072e-13	6.64661e-44	2.47845e-06	2.72316e-12	L	Lost
chr1	107804721	107805419	90.4237	25.1819	25.8401	11.674	14.1744	2.68802	107805212	107805261	107805272	+	13.7895	2.18342	-1.83968	0.343735	4.52108e-17	3.72036e-07	0.288671	8.85914e-17	1.51771e-06	0.358782	L	Lost
chr1	107819639	107819932	45.3858	15.1479	27.9161	10.7099	16.9671	0	107819756	107819853	107819864	+	7.61404	2.18568	-1.58042	0.605257	2.61103e-13	0.000168167	0.115813	3.67224e-13	0.000348057	0.158962	L	Lost
chr1	107821205	107821781	42.8765	69.0902	14.5842	24.5111	7.21329	12.2178	107821559	107821458	107821469	+	18.1053	1.85084	0.680632	2.53147	4.44562e-08	0.086685	3.51444e-14	4.70241e-08	0.109761	1.9728e-13	BM	Book
chr1	107954655	107955427	111.603	31.6426	37.0865	10.9981	32.9742	4.69208	107954880	107955335	107955346	-	8.82456	3.34797	-1.8001	1.54787	3.47033e-27	4.58539e-06	1.24778e-05	1.73124e-26	1.3772e-05	2.9611e-05	L	Lost
chr1	107973798	107974088	38.8052	4.1498	22.5356	2.50977	20.0154	0	107973914	107973838	107973849	-	3.2807	2.62334	-3.28561	-0.662271	2.54617e-12	1.09498e-06	0.303388	3.33704e-12	3.91282e-06	0.374855	L	Lost
chr1	108005616	108006162	103.294	19.1039	53.7372	7.23601	37.9813	0	108005980	108005916	108005927	-	7.49123	2.96411	-2.43356	0.530551	2.92388e-25	1.29248e-09	0.148861	1.22398e-24	1.08887e-08	0.199184	L	Lost
chr1	108060522	108061266	97.409	33.0989	45.4095	15.0535	51.6756	6.08846	108060856	108060829	108060840	+	10.5789	3.04313	-1.57738	1.46574	1.51345e-25	2.12529e-05	1.23211e-05	6.49827e-25	5.36429e-05	2.92578e-05	L	Lost
chr1	108080322	108081857	225.691	200.213	65.3552	40.7226	87.1942	31.3955	108081116	108081114	108081125	-	16.3333	3.50172	-0.17411	3.32761	7.97818e-37	0.593598	1.52133e-32	9.03014e-36	0.632122	6.97614e-31	BS	Book
chr1	108118496	108118945	81.6865	10.1284	55.0464	3.56827	59.871	0	108118724	0	0	0	0	3.37838	-2.9587	0.419682	6.9888e-25	1.10502e-09	0.359177	2.82088e-24	9.48804e-09	0.434369	L	Lost
chr1	108175444	108175685	28.373	6.07804	22.1166	5.11392	22.4943	0	108175563	108175530	108175541	-	6.59649	3.22118	-2.20206	1.01912	6.59225e-15	0.000185575	0.076806	1.06152e-14	0.000380837	0.109419	L	Lost
chr1	108291804	108292303	64.9409	23.2537	33.7536	12.5438	16.5974	3.94807	108292180	108292135	108292146	-	13.807	2.19922	-1.48722	0.712002	5.04776e-12	0.000445665	0.0565511	6.47118e-12	0.000848496	0.0826136	L	Lost
chr1	108460662	108461361	78.744	18.3285	27.1113	5.69036	24.1081	0	108460781	108460762	108460773	-	5.57895	2.35845	-2.07375	0.284698	8.21406e-12	1.05049e-05	0.491965	1.03844e-11	2.86776e-05	0.566739	L	Lost
chr1	109857566	109858028	99.1941	23.4475	48.752	10.6155	56.4442	3.66932	109857839	109857801	109857812	-	16.5263	4.2005	-2.0915	2.10901	8.90215e-34	7.66928e-07	1.69271e-07	7.84819e-33	2.86641e-06	4.85453e-07	L	Lost
chr1	109873810	109875272	167.035	81.7233	29.5731	16.9818	29.2493	9.79224	109874589	109874217	109874228	+	14.3158	2.81231	-1.03187	1.78044	7.73212e-25	0.00226698	8.36063e-10	3.11202e-24	0.00379972	3.0226e-09	L	Lost
chr1	110038763	110038965	25.4448	10.7099	21.2738	6.75395	15.1947	0	110038865	110038857	110038868	+	2.59649	2.40383	-1.24932	1.15451	1.98078e-10	0.0130896	0.0136555	2.30911e-10	0.0191973	0.02218	L	Lost
chr1	110154587	110154935	41.2385	31.26	24.1546	17.0762	25.8849	11.1471	110154761	110154719	110154730	+	13.7193	3.25962	-0.394479	2.86514	2.23256e-20	0.313768	2.37552e-14	5.95624e-20	0.356411	1.35888e-13	BS	Book
chr1	110155773	110156369	65.7932	27.6866	24.9736	12.832	28.6399	6.64183	110155919	110156100	110156111	-	12.9123	2.93266	-1.23108	1.70159	1.2608e-14	0.00929461	4.54098e-05	1.98142e-14	0.0139852	0.000101314	L	Lost
chr1	110443829	110444487	61.6459	33.9687	26.6591	15.2474	25.3045	6.08846	110444130	110444069	110444080	-	8.35088	2.72865	-0.8838	1.84485	3.84781e-18	0.0220715	1.04711e-07	8.30795e-18	0.0310549	3.07235e-07	L	Lost
chr1	110629350	110629791	32.0538	64.3487	17.4982	30.0076	14.7711	24.8036	110629671	110629633	110629644	-	16.9298	4.72294	1.01366	5.7366	4.98153e-22	0.0094174	7.8026e-33	1.55252e-21	0.0141568	3.77159e-31	BM	Book
chr1	112655485	112655909	49.5805	29.9132	30.0016	12.5438	31.847	4.26944	112655612	112655571	112655582	-	13.9474	3.44709	-0.742635	2.70445	2.93063e-22	0.0663491	2.40574e-12	9.31307e-22	0.0858438	1.12289e-11	L	Lost
chr1	112670371	112672169	362.376	107.869	68.2929	24.6999	73.5672	9.96704	112671550	112671586	112671597	-	12.4561	3.93291	-1.7477	2.18521	8.39412e-55	1.47975e-08	4.48929e-16	4.17039e-53	9.12619e-08	3.08433e-15	L	Lost
chr1	112800575	112801159	71.6543	17.8465	26.6638	6.84833	21.9625	2.74224	112800900	112800950	112800961	-	13.8947	4.03174	-1.98047	2.05127	1.02939e-22	8.47229e-05	1.36389e-05	3.41384e-22	0.000186138	3.22424e-05	L	Lost
chr1	113202080	113202683	31.2538	59.245	12.9224	23.1542	5.44971	21.1652	113202256	113202341	113202352	+	13.9474	1.69815	0.918345	2.61649	1.65915e-06	0.0252281	2.691e-14	1.69768e-06	0.0351769	1.52673e-13	BM	Book
chr1	113939540	113939985	67.0881	15.0535	35.0058	6.46573	41.1233	0	113939761	113939791	113939802	+	5.64912	3.63094	-2.18106	1.44988	2.36365e-27	7.39464e-07	0.000619896	1.19443e-26	2.77701e-06	0.00120689	L	Lost
chr1	114675179	114675429	48.7804	7.04217	38.3672	5.2083	39.7651	0	114675314	114675251	114675262	+	16.3333	5.30181	-2.75243	2.54937	9.61826e-27	8.89735e-07	4.52631e-05	4.60009e-26	3.26499e-06	0.000101	L	Lost
chr1	114676327	114676521	25.8069	3.76211	23.3119	3.28005	21.4364	0	114676424	114676317	114676328	-	8.92982	4.39566	-2.72233	1.67333	1.28425e-18	4.72937e-05	0.0198689	2.91066e-18	0.000109656	0.0314743	L	Lost
chr1	115471290	115471826	48.7567	16.7879	20.8406	8.00629	19.6297	3.84553	115471390	115471686	115471697	+	8.49123	3.81052	-1.53321	2.27731	8.88921e-26	0.000357066	1.13094e-07	3.89964e-25	0.000693549	3.30714e-07	L	Lost
chr1	115855080	115855270	27.5208	2.89237	27.1066	2.89237	25.5685	0	115855176	115855193	115855204	+	9.29825	5.38077	-3.05796	2.32281	9.44238e-19	2.10707e-05	0.00533007	2.1639e-18	5.3278e-05	0.00919217	L	Lost
chr1	115855747	115856036	39.5958	8.00629	26.6638	4.24418	15.1626	0	115855928	115855981	115855992	+	3.5614	4.85975	-2.25107	2.60868	1.37778e-24	2.11109e-05	9.08497e-06	5.42619e-24	5.33482e-05	2.18701e-05	L	Lost
chr1	115860643	115861533	146.332	23.5368	60.8696	7.71807	68.4295	2.37046	115861275	115860834	115860845	+	3.75439	3.52655	-2.60524	0.92131	6.73253e-26	3.92189e-09	0.0196298	2.98361e-25	2.87669e-08	0.031129	L	Lost
chr1	116072517	116072988	42.1097	10.8043	22.1023	6.46573	23.1479	0	116072765	116072755	116072766	+	13.0702	2.83132	-1.92316	0.908165	1.15898e-15	8.61635e-05	0.048001	1.99492e-15	0.000189034	0.0710809	L	Lost
chr1	116745712	116746190	53.285	13.99	28.7161	5.11392	23.1054	0	116746063	116746040	116746051	-	14.1579	2.47427	-1.92433	0.549939	1.16986e-15	1.152e-05	0.173764	2.01303e-15	3.11234e-05	0.228743	L	Lost
chr1	117228416	117228842	35.8343	1.15796	23.7261	1.15796	20.2853	0	117228740	117228739	117228750	-	10.2456	3.78369	-4.99025	-1.20656	2.1007e-19	4.92912e-06	0.26929	5.10843e-19	1.46912e-05	0.337576	L	Lost
chr1	117926284	117926664	60.4221	7.23601	27.0971	3.28005	28.0437	0	117926456	117926571	117926582	+	9.70175	3.66671	-3.0516	0.615106	1.54829e-18	3.97948e-07	0.278532	3.48118e-18	1.60891e-06	0.347632	L	Lost
chr1	118263200	118263966	106.717	14.0843	51.7039	3.47389	44.011	0	118263617	118263693	118263704	-	5.08772	2.88068	-2.88834	-0.00765495	6.43385e-21	1.3766e-10	0.985115	1.80549e-20	1.54984e-09	0.988611	L	Lost
chr1	118266515	118267188	57.9746	48.6345	22.5498	15.0535	25.2656	9.16983	118266805	118266730	118266741	+	16.5263	2.19873	-0.266647	1.93208	8.95913e-13	0.474906	2.2752e-09	1.20999e-12	0.518017	7.86676e-09	L	Lost
chr1	119187368	119187822	53.4321	3.66774	30.4728	1.83387	33.377	0	119187525	119187413	119187424	+	2.31579	3.1527	-3.92404	-0.771345	5.17745e-06	9.89633e-05	0.388417	5.26859e-06	0.000214673	0.464433	L	Lost
chr1	119354417	119354633	31.2491	9.64632	24.5831	8.68219	10.4479	0	119354532	0	0	0	0	2.2325	-1.64421	0.588285	4.34258e-11	0.000736058	0.19389	5.25617e-11	0.00134689	0.252253	L	Lost
chr1	120125006	120125637	155.003	17.5582	91.2665	7.42985	96.5495	2.37046	120125357	120125400	120125411	+	15.7018	3.80625	-3.12059	0.685665	6.02788e-39	2.74069e-14	0.0726741	8.27109e-38	8.83188e-13	0.104022	L	Lost
chr1	120232562	120233148	74.9446	41.98	38.3056	16.8874	30.5481	8.04948	120232788	120232747	120232758	-	17.8772	2.76822	-0.854034	1.91418	1.31944e-13	0.0628367	1.36561e-06	1.90028e-13	0.0816699	3.57943e-06	L	Lost
chr1	120235769	120236484	144.057	28.2732	69.5546	11.2914	61.4931	2.10804	120236171	120236154	120236165	-	13.9474	3.38598	-2.36679	1.01919	9.28191e-34	1.99359e-10	0.00261832	8.16601e-33	2.1374e-09	0.00471365	L	Lost
chr1	120298322	120299588	338.927	105.076	61.6744	17.7521	55.6499	10.0259	120299447	120299403	120299414	-	16.9298	3.70097	-1.6927	2.00827	1.34306e-52	1.42571e-08	1.15374e-14	5.54431e-51	8.83625e-08	6.81932e-14	BA	Book
chr1	120307978	120308442	77.8017	19.2926	49.5046	14.5664	65.2659	9.86372	120308308	120308278	120308289	+	13.9474	4.59567	-1.97752	2.61816	4.30744e-32	1.06847e-05	5.18684e-09	3.2787e-31	2.91169e-05	1.73012e-08	L	Lost
chr1	120354853	120355191	38.7388	20.6495	22.0881	9.45756	13.4133	2.33314	120355053	120355065	120355076	-	11.9649	2.3279	-0.919479	1.40842	1.52859e-09	0.0587941	0.00103289	1.70675e-09	0.0768425	0.00195696	L	Lost
chr1	120355373	120355870	59.5557	31.1656	29.1636	11.192	15.5474	4.41297	120355639	120355733	120355744	+	4.54386	1.77038	-0.937909	0.832473	2.07831e-07	0.0324747	0.0261295	2.16117e-07	0.0443803	0.0405679	L	Lost
chr1	120355947	120356282	33.3488	29.7194	21.2691	13.6074	13.8007	4.79997	120356153	120356186	120356197	+	3.84211	1.64588	-0.172013	1.47387	0.000150541	0.748819	0.00107014	0.000151524	0.77677	0.00202474	L	Lost
chr1	120370658	120370971	37.1008	7.23601	21.2501	3.28005	12.9856	0	120370870	120370946	120370957	-	7.03509	3.10356	-2.34671	0.756854	2.44473e-15	3.40944e-05	0.161528	4.08797e-15	8.1825e-05	0.214383	L	Lost
chr1	120383222	120383569	40.81	14.0894	22.4976	7.14163	14.509	0	120383453	120383397	120383408	+	6.68421	3.06513	-1.57431	1.49082	4.32893e-19	0.000419823	0.000490773	1.02393e-18	0.000804078	0.000966927	L	Lost
chr1	120383946	120384285	37.0676	12.2556	22.8976	5.30776	16.8565	0	120384037	120384084	120384095	-	11.1754	2.12461	-1.63163	0.492975	1.69605e-10	0.000546681	0.253169	1.98428e-10	0.00102195	0.319737	L	Lost
chr1	120407420	120408249	59.5747	98.223	17.0886	21.8075	8.56559	12.9549	120407743	120407661	120407672	+	16.5614	1.7934	0.720467	2.51387	2.00478e-09	0.041373	1.60412e-17	2.22511e-09	0.0556366	1.29048e-16	BM	Book
chr1	120449493	120449833	32.0681	46.9996	17.0934	22.7767	10.7764	12.9304	120449681	120449645	120449656	-	18.4737	1.95775	0.526955	2.4847	3.12644e-08	0.199785	1.69703e-12	3.32121e-08	0.236213	8.04041e-12	BS	Book
chr1	120517832	120518166	51.6327	28.6558	30.8253	14.9541	17.3636	9.26638	120517961	120518012	120518023	+	9.36842	2.29267	-0.848626	1.44405	5.85782e-13	0.0343094	4.73597e-05	8.02963e-13	0.0467315	0.000105464	L	Lost
chr1	120521942	120523697	633.154	107.298	205.155	18.8157	212.409	6.76662	120522189	120522281	120522292	-	2.36842	3.70954	-2.56439	1.14515	7.28478e-41	2.44966e-13	9.99408e-05	1.16491e-39	6.0498e-12	0.000214449	L	Lost
chr1	120523737	120524410	96.59	97.0854	34.5631	32.2292	28.555	19.6825	120524111	120524033	120524044	-	17.8772	2.93884	-0.00479843	2.93404	9.45877e-20	0.989942	4.16579e-19	2.37172e-19	0.991373	3.95739e-18	BS	Book
chr1	120524666	120525378	71.9737	62.3312	26.6354	15.2474	22.1577	7.43493	120525080	120525039	120525050	-	2.36842	2.30302	-0.210287	2.09273	6.30825e-13	0.58737	2.63283e-10	8.62094e-13	0.626233	9.98323e-10	L	Lost
chr1	120525472	120526133	130.287	121.477	53.7135	47.4715	58.2925	37.3434	120525840	120525824	120525835	-	16.3333	3.62382	-0.102135	3.52169	1.69983e-34	0.761859	1.42709e-31	1.59206e-33	0.78832	5.84144e-30	BS	Book
chr1	120530239	120530762	137.852	25.3758	49.9568	9.55194	46.2109	0	120530393	120530397	120530408	-	13.8421	2.6865	-2.44287	0.243627	2.89661e-17	1.37115e-08	0.517567	5.7723e-17	8.54497e-08	0.591154	L	Lost
chr1	120538712	120540563	965.998	146.381	202.455	30.5841	183.092	23.7632	120539624	120539648	120539659	-	14.3158	4.29146	-2.72707	1.56439	4.99321e-71	1.56571e-19	9.30611e-10	8.60073e-69	2.15972e-17	3.34836e-09	BA	Book
chr1	120542355	120542584	35.4438	5.98367	25.0306	3.47389	15.2401	0	120542471	0	0	0	0	1.92269	-2.63769	-0.715001	4.1742e-09	4.05174e-06	0.183798	4.56869e-09	1.2333e-05	0.240376	L	Lost
chr1	120544354	120545337	592.966	74.7704	365.047	23.7307	224.412	12.8528	120544740	120545308	120545319	+	7.84211	4.2893	-2.98226	1.30704	2.46003e-51	1.32102e-16	2.33843e-05	8.96631e-50	7.9762e-15	5.38293e-05	BA	Book
chr1	120559547	120560093	207.383	103.934	81.2011	40.7226	95.7559	26.7157	120559826	120559731	120559742	-	15.1404	4.23783	-1.00818	3.22965	1.97079e-47	0.00295095	3.858e-26	5.43256e-46	0.00484937	8.20773e-25	BA	Book
chr1	120586278	120586802	68.3973	13.6023	22.9403	5.40214	10.8768	0	120586535	120586375	120586386	+	5.50877	1.81065	-2.30327	-0.492618	1.36093e-07	3.28767e-06	0.259664	1.42217e-07	1.02528e-05	0.327007	L	Lost
chr1	120626520	120626926	62.4317	11.9622	32.8918	4.24418	30.6627	0	120626783	0	0	0	0	2.73315	-2.3518	0.381352	2.22894e-17	4.80144e-07	0.377453	4.48445e-17	1.90202e-06	0.4533	L	Lost
chr1	120644717	120645183	87.4433	33.8692	42.5003	14.7653	33.7325	5.46942	120644992	120644996	120645007	-	17.8772	3.11831	-1.38133	1.73697	1.54979e-26	0.00015402	1.87277e-07	7.26569e-26	0.000321287	5.34652e-07	L	Lost
chr1	120653330	120653865	118.259	57.3116	52.8565	24.6055	56.7737	12.257	120653632	120653637	120653648	-	17.8772	2.87108	-1.04435	1.82673	1.58454e-28	0.00108489	1.24797e-10	8.87262e-28	0.00192499	4.8883e-10	BA	Book
chr1	120672906	120673460	64.1172	22.5778	26.6544	10.9037	21.7324	0	120673191	120673029	120673040	-	8.05263	2.17629	-1.50825	0.66804	5.53868e-13	0.000203355	0.0641449	7.60783e-13	0.000413721	0.0927488	L	Lost
chr1	120770677	120771054	52.5039	29.4261	23.7451	11.8679	11.8267	3.90365	120770856	120770894	120770905	+	14.3158	2.16429	-0.82761	1.33668	1.80677e-10	0.0533695	0.000336091	2.1101e-10	0.070305	0.000676468	L	Lost
chr1	120812250	120812690	53.3704	39.8478	26.6686	17.9459	20.1283	8.10347	120812384	120812429	120812440	+	17.8772	2.5537	-0.419682	2.13402	2.25341e-16	0.259522	1.34627e-10	4.13435e-16	0.300087	5.25695e-10	L	Lost
chr1	120843608	120844242	149.061	55.9547	71.2164	20.7439	66.0251	10.5809	120843924	120843921	120843932	-	16.3333	2.85307	-1.4038	1.44927	6.25078e-21	0.000236928	1.01625e-05	1.75673e-20	0.000476001	2.43501e-05	BA	Book
chr1	120920433	120921049	65.8406	11.192	21.6644	5.8842	14.1888	0	120920667	120920569	120920580	-	11.1228	2.18797	-2.55054	-0.362571	7.74038e-15	1.15232e-08	0.380802	1.23876e-14	7.34163e-08	0.456584	L	Lost
chr1	120928437	120929202	114.978	63.0122	40.8385	18.6269	30.6629	8.78164	120928826	120928884	120928895	+	10.6842	2.48693	-0.876628	1.61031	2.82508e-15	0.0250489	1.30152e-06	4.69528e-15	0.0349399	3.41697e-06	L	Lost
chr1	120945632	120946203	107.489	9.06988	55.8369	3.28005	51.7341	0	120945782	0	0	0	0	2.93119	-3.57415	-0.642957	2.97983e-20	2.67282e-12	0.174281	7.86456e-20	4.93453e-11	0.229344	L	Lost
chr1	120951670	120952272	86.5436	26.7276	31.2111	9.3581	27.6875	0	120952023	120951975	120951986	-	13.9474	2.34936	-1.70134	0.648027	1.41304e-12	9.96084e-05	0.0885466	1.881e-12	0.000215989	0.124581	L	Lost
chr1	120952731	120953383	83.3245	20.2618	30.4206	7.81753	18.5194	0	120953082	120952883	120952894	+	8.01754	2.40859	-2.04007	0.368525	2.71322e-17	3.11432e-07	0.305263	5.41957e-17	1.30113e-06	0.376878	L	Lost
chr1	120971574	120975015	1358.15	800.465	212.049	115.781	152.058	88.1602	120973285	120974420	120974431	+	17.8772	3.57538	-0.763067	2.81231	2.48402e-47	0.012425	1.52172e-29	6.81302e-46	0.018297	4.82583e-28	BA	Book
chr1	120978691	120979301	89.5762	16.7879	30.8158	6.46573	18.9239	0	120979005	120979261	120979272	-	4.12281	1.89326	-2.4108	-0.517539	2.04649e-11	8.71187e-09	0.16728	2.52547e-11	5.77157e-08	0.221203	L	Lost
chr1	121044841	121045316	70.7452	18.91	35.7868	9.93962	31.8044	0	121044972	121044969	121044980	-	5.64912	2.43159	-1.89464	0.536958	7.5644e-15	9.94891e-06	0.162696	1.21157e-14	2.73446e-05	0.215748	L	Lost
chr1	121050039	121050415	73.6924	39.2713	32.4728	20.3613	20.7843	10.7889	121050179	121050165	121050176	+	18.1053	2.53207	-0.91207	1.62	8.38363e-11	0.0597967	8.87866e-05	9.97376e-11	0.0780176	0.000191544	BS	Book
chr1	121062627	121063496	101.466	28.3625	37.8344	7.91191	43.6571	0	121063106	121063429	121063440	-	13.7193	2.31257	-1.82041	0.492164	6.3261e-14	9.22262e-06	0.168852	9.35556e-14	2.55951e-05	0.223014	L	Lost
chr1	121064127	121064458	83.2391	15.63	49.1045	7.04217	38.0268	0	121064251	121064306	121064317	-	4.19298	2.46735	-2.40764	0.0597141	3.03047e-11	2.61459e-06	0.894628	3.70329e-11	8.39048e-06	0.918477	L	Lost
chr1	121084005	121084213	33.363	4.24418	24.1831	3.76211	11.781	0	121084098	121084078	121084089	-	9.36842	2.17139	-2.90302	-0.731632	4.92148e-10	4.28216e-06	0.222549	5.62008e-10	1.29622e-05	0.284982	L	Lost
chr1	121090567	121091635	141.6	129.299	36.2201	39.4652	32.654	24.0558	121090873	121090862	121090873	-	17.8772	2.20106	-0.134971	2.06609	1.1583e-15	0.687451	1.78045e-13	1.99384e-15	0.72	9.30048e-13	BS	Book
chr1	121093744	121094869	233.985	140.586	45.819	34.9277	42.8745	23.5133	121094455	121094547	121094558	+	17.8772	2.68148	-0.737517	1.94396	8.11588e-24	0.0246119	1.68983e-12	2.97372e-23	0.0343784	8.00742e-12	BA	Book
chr1	121104119	121105018	139.367	41.8755	43.6861	13.2197	41.6917	0	121104646	121104667	121104678	+	18.4737	2.41924	-1.7378	0.681438	1.49109e-17	2.79898e-06	0.0335592	3.05151e-17	8.9025e-06	0.0511298	L	Lost
chr1	121106220	121106624	53.3324	15.2423	22.5024	5.5016	14.5032	0	121106399	121106381	121106392	+	12	1.99494	-1.77899	0.215945	6.31692e-10	8.78094e-05	0.594044	7.17425e-10	0.000192396	0.663147	L	Lost
chr1	121195371	121195964	166.469	77.9612	61.9937	31.8415	63.2367	18.5128	121195676	121195637	121195648	-	10.5439	3.23308	-1.09569	2.13739	3.79069e-26	0.00335431	3.12414e-11	1.72103e-25	0.00545558	1.30043e-10	BA	Book
chr1	121197948	121199179	203.489	88.0895	39.9104	15.63	38.8382	4.33281	121198131	121198620	121198631	-	10.1579	2.24523	-1.20722	1.03801	2.7324e-14	0.00117896	0.000827027	4.17557e-14	0.00207875	0.00158596	L	Lost
chr1	121201226	121202612	1177.84	396.968	323.552	84.1438	229.861	68.7498	121202026	121201710	121201721	-	16.3333	4.77961	-1.57071	3.2089	3.9087e-89	5.39621e-08	1.20426e-39	3.01441e-86	2.82097e-07	1.28504e-37	BA	Book
chr1	121209815	121210419	64.103	31.5533	24.1451	10.2278	20.0604	4.47556	121209988	121209985	121209996	+	8.45614	2.64814	-1.03525	1.61289	4.81509e-18	0.00683447	2.68044e-06	1.02949e-17	0.010532	6.8331e-06	L	Lost
chr1	121222764	121223497	91.2048	107.204	27.9161	32.9051	19.6042	19.7451	121223200	121223204	121223215	-	17.9123	2.99902	0.228243	3.22726	3.91414e-23	0.512811	4.48111e-26	1.34773e-22	0.554939	9.43871e-25	BS	Book
chr1	121226415	121227037	133.934	52.2972	47.438	16.5992	41.3041	6.74185	121226726	121226736	121226747	+	9.54386	2.51041	-1.36051	1.1499	1.08522e-14	0.000939261	0.000992678	1.71502e-14	0.00168644	0.00188519	L	Lost
chr1	121244368	121244770	135.305	31.5482	57.0322	11.9622	51.7904	4.12165	121244529	121244732	121244743	-	7.2807	3.07756	-2.09218	0.985384	1.312e-20	1.06136e-06	0.00857402	3.5782e-20	3.81031e-06	0.0143576	L	Lost
chr1	121244933	121245461	95.3046	31.9359	39.1293	12.9315	32.6487	3.06058	121245163	0	0	0	0	2.23308	-1.57532	0.657756	1.84982e-11	0.000277313	0.0773948	2.28912e-11	0.000549108	0.110203	L	Lost
chr1	121252252	121252958	77.0776	38.5954	22.5071	11.192	15.1947	0	121252753	121252712	121252723	+	17.8772	1.85782	-1.00202	0.855792	4.0983e-09	0.0134993	0.0133342	4.48765e-09	0.019742	0.0216911	L	Lost
chr1	121253585	121253889	45.0332	4.92008	28.7398	3.47389	19.0251	0	121253735	121253721	121253732	+	2.42105	2.33771	-3.15982	-0.822111	2.81577e-12	1.58104e-07	0.150191	3.6783e-12	7.1772e-07	0.200798	L	Lost
chr1	121285350	121286080	140.328	37.0498	51.228	12.5438	44.7793	3.15159	121285692	121285757	121285768	+	11.1754	2.69938	-1.92021	0.779174	2.49424e-16	6.77575e-06	0.0336366	4.55823e-16	1.94536e-05	0.0512386	L	Lost
chr1	121293110	121293349	35.7916	17.7572	20.8264	10.6155	11.0225	0	121293197	121293216	121293227	+	15.1754	2.06847	-1.04901	1.01945	9.69578e-09	0.025875	0.014656	1.04626e-08	0.0359873	0.0236797	L	Lost
chr1	121294587	121296239	622.883	187.774	190.685	28.462	150.529	18.2101	121295452	121295497	121295508	+	16.5263	3.50808	-1.7321	1.77598	1.31557e-30	4.95091e-06	1.41885e-08	8.83462e-30	1.47432e-05	4.53479e-08	BA	Book
chr1	121298792	121299578	122.411	65.6163	34.9821	18.7213	23.2336	9.0784	121298907	121298815	121298826	+	6.33333	2.82749	-0.908856	1.91863	8.15105e-24	0.00839974	1.68475e-10	2.98628e-23	0.012737	6.52162e-10	L	Lost
chr1	121301369	121302012	258.902	55.2839	116.069	17.8515	119.509	11.757	121301681	121301684	121301695	-	16.9298	3.66731	-2.22468	1.44263	1.57369e-32	1.1412e-08	1.86788e-05	1.24388e-31	7.28587e-08	4.34753e-05	BA	Book
chr1	121328043	121328731	99.9942	61.0738	38.3056	16.4997	21.1125	4.28972	121328416	121328352	121328363	-	14.807	2.28619	-0.709568	1.57663	9.19656e-15	0.0528173	4.68765e-07	1.46215e-14	0.069648	1.28582e-06	L	Lost
chr1	121329863	121330357	69.1926	84.432	28.7683	32.6118	21.9811	17.1641	121330235	121330146	121330157	+	16.9298	2.31986	0.279507	2.59936	6.28618e-17	0.388473	1.95597e-20	1.21502e-16	0.432836	2.16418e-19	BS	Book
chr1	121338938	121340020	159.37	49.9812	46.1763	10.6155	51.4354	2.82027	121339657	121339629	121339640	-	17.8772	2.55764	-1.67819	0.879449	3.47136e-24	3.20294e-07	0.00213878	1.31642e-23	1.33181e-06	0.00389311	L	Lost
chr1	121345799	121346347	86.9626	41.4929	32.0111	17.7572	31.2071	9.51012	121346097	121346148	121346159	+	18.1053	2.43166	-1.07901	1.35265	1.15052e-14	0.00660701	8.3451e-05	1.81492e-14	0.0102065	0.000180573	L	Lost
chr1	121350375	121350594	31.6206	3.47389	23.2977	2.99183	11.6283	0	121350485	0	0	0	0	2.24917	-3.22036	-0.971186	1.1854e-08	9.35454e-06	0.158829	1.27554e-08	2.59203e-05	0.211123	L	Lost
chr1	121369668	121370211	62.8887	46.895	23.7309	19.1039	16.0099	10.8822	121370012	121369985	121369996	+	17.3158	2.41564	-0.430122	1.98551	5.9095e-13	0.291534	1.78549e-08	8.09655e-13	0.3334	5.65072e-08	BS	Book
chr1	121379206	121379745	74.5968	75.153	29.1636	27.8805	18.3762	21.9385	121379590	121379507	121379518	+	17.8772	2.31149	0.0174682	2.32896	2.19577e-11	0.966537	3.45362e-11	2.7048e-11	0.971058	1.43231e-10	BS	Book
chr1	121383012	121383552	63.265	31.5533	21.2311	11.0032	16.4865	2.14041	121383297	121383370	121383381	+	16.9298	2.28232	-1.01707	1.26526	2.96916e-15	0.00599895	0.000117695	4.92316e-15	0.00933687	0.00025011	L	Lost
chr1	121394061	121394454	93.752	6.36627	50.8517	3.76211	36.7314	0	121394325	121394274	121394285	-	1.57895	2.69455	-3.819	-1.12445	3.23953e-15	3.43238e-11	0.0353151	5.35603e-15	4.61901e-10	0.0536317	L	Lost
chr1	121462282	121462790	97.5039	21.226	44.5905	7.91191	35.269	0	121462595	121462541	121462552	-	12.5439	2.76137	-2.19353	0.567846	1.04205e-22	1.94347e-08	0.109689	3.4531e-22	1.16126e-07	0.151353	L	Lost
chr1	121531456	121531691	43.7762	2.02771	33.3535	1.35181	21.1125	0	121531596	121531612	121531623	+	-0.54386	2.47624	-4.67553	-2.1993	2.43375e-13	2.19754e-07	0.0127589	3.43044e-13	9.56628e-07	0.0208208	L	Lost
chr1	121724237	121725421	132.796	138.469	37.0818	35.9913	41.5982	19.8726	121724964	121725046	121725057	+	18.1053	3.52086	0.0570005	3.57786	3.13671e-25	0.885532	1.5009e-25	1.30936e-24	0.89996	2.99061e-24	BS	Book
chr1	121734191	121735309	60.3462	184.772	14.9794	39.9422	6.85493	32.2724	121734592	121734666	121734677	-	17.0877	1.56534	1.61335	3.17869	7.85031e-08	1.94659e-06	2.3931e-30	8.25436e-08	6.46635e-06	8.45007e-29	BM	Book
chr1	121766438	121767228	81.1489	41.8857	27.8876	10.8094	23.9671	2.15422	121766727	121767130	121767141	-	9.64912	2.1706	-0.984814	1.18579	8.44965e-13	0.01061	0.000360351	1.14373e-12	0.0158207	0.00072217	L	Lost
chr1	121809787	121810546	271.896	99.6692	128.22	41.6817	135.416	20.2967	121810057	121810094	121810105	-	12.5439	3.74161	-1.44811	2.2935	4.84412e-51	1.62244e-06	6.77468e-18	1.72845e-49	5.51202e-06	5.65941e-17	BA	Book
chr1	121894153	121894547	37.9482	12.1561	22.5071	4.92008	11.2283	0	121894454	121894446	121894457	-	8.91228	2.1204	-1.62546	0.494941	1.18896e-09	0.000859278	0.262359	1.33372e-09	0.0015531	0.329996	L	Lost
chr1	121938652	121940407	314.121	166.737	74.883	37.3431	76.1162	23.8376	121939542	121940046	121940057	+	17.0877	3.20849	-0.916867	2.29162	1.36335e-36	0.00311372	2.599e-18	1.51333e-35	0.00509513	2.26948e-17	BA	Book
chr1	121970445	121971145	246.965	102.646	77.4206	34.3462	67.6736	22.6882	121970637	121970644	121970655	-	15.1754	3.408	-1.25799	2.15	4.98115e-36	0.000156314	6.09569e-14	5.30359e-35	0.000325552	3.33567e-13	BA	Book
chr1	121973004	121973317	38.7103	14.5715	21.2311	8.49344	11.0576	0	121973191	121973156	121973167	-	14.1579	1.86592	-1.44074	0.425176	1.75986e-08	0.0017697	0.302906	1.88347e-08	0.00302434	0.374349	L	Lost
chr1	121974366	121974635	42.086	1.64003	28.3256	1.15796	11.1228	0	121974484	0	0	0	0	2.02913	-4.64225	-2.61312	2.05695e-10	2.6683e-07	0.00304324	2.39561e-10	1.13624e-06	0.00542964	L	Lost
chr1	121982647	121983524	268.129	123.311	74.1256	36.1851	54.0189	18.2099	121983063	121982987	121982998	+	17.8772	3.06828	-1.12171	1.94657	3.31134e-25	0.00213176	2.17281e-10	1.3792e-24	0.00358975	8.30855e-10	BA	Book
chr1	121985885	121986502	222.239	42.4519	105.732	16.3059	85.3714	5.10876	121986075	121986209	121986220	+	14.1579	3.29557	-2.38553	0.910041	2.00973e-21	8.23733e-08	0.0166484	5.91827e-21	4.08233e-07	0.0266677	L	Lost
chr1	122017835	122018649	64.6121	98.4219	18.3314	24.9932	6.39846	11.1784	122018345	122018323	122018334	-	5.59649	1.44951	0.602498	2.05201	5.8109e-07	0.0843431	1.03399e-12	5.98753e-07	0.107075	5.00233e-12	BM	Book
chr1	122161916	122162635	198.018	105.752	95.2382	40.3298	102.377	22.7487	122162182	122162216	122162227	+	17.9123	2.92722	-0.907283	2.01994	3.48113e-21	0.0173115	3.09242e-10	1.00216e-20	0.0248398	1.16246e-09	BA	Book
chr1	122163046	122163457	87.9097	9.45756	42.9382	5.21338	38.1249	0	122163255	122163196	122163207	-	7.12281	2.84354	-3.26297	-0.419428	2.73422e-17	4.44912e-10	0.38421	5.4596e-17	4.34136e-09	0.460149	L	Lost
chr1	122166835	122167251	51.628	8.68219	24.1641	3.56827	12.8382	0	122166958	122167214	122167225	+	6.89474	1.84042	-2.53315	-0.69273	1.13999e-09	2.84448e-07	0.127737	1.27989e-09	1.20246e-06	0.173649	L	Lost
chr1	122200879	122201487	58.7604	60.5024	23.3451	23.2537	16.6029	13.806	122201205	122201187	122201198	+	17.8772	2.19093	0.0315359	2.22247	6.86728e-14	0.927766	1.58087e-13	1.01285e-13	0.936822	8.30655e-13	BS	Book
chr1	122269010	122269635	101.585	27.1203	39.1293	8.49344	30.4952	0	122269357	122269312	122269323	-	9.21053	2.37411	-1.95036	0.423747	9.5144e-16	1.07304e-06	0.228946	1.65159e-15	3.84697e-06	0.29227	L	Lost
chr1	122270790	122272054	138.643	65.9989	21.6454	13.9007	13.6188	3.68824	122271222	122271327	122271338	+	16.3509	2.14686	-1.07574	1.07112	1.33046e-16	0.00111757	0.000142389	2.49098e-16	0.00197854	0.000299471	L	Lost
chr1	122286510	122286917	57.4607	16.8823	25.8211	8.58782	15.1691	0	122286733	122286772	122286783	-	16.7193	2.19109	-1.73754	0.453556	5.24329e-14	2.24057e-05	0.222748	7.81072e-14	5.62263e-05	0.285183	L	Lost
chr1	122363476	122363938	71.2021	21.1316	37.5008	7.81753	29.522	0	122363683	122363695	122363706	+	9.29825	2.49765	-1.76516	0.732493	8.97112e-19	5.06414e-06	0.037587	2.05993e-18	1.50408e-05	0.0568149	L	Lost
chr1	122369663	122370352	77.778	63.9661	31.5969	19.1983	32.8374	11.6491	122370086	122370054	122370065	-	17.8772	2.20124	-0.277823	1.92342	7.23942e-14	0.437963	3.53826e-10	1.06556e-13	0.4822	1.32243e-09	BS	Book
chr1	122375944	122376552	31.2633	67.6491	9.58469	21.907	3.09704	10.8275	122376300	122376254	122376265	-	17.9123	1.21661	1.09877	2.31538	0.000353818	0.00593754	1.18151e-12	0.000355505	0.00924977	5.68363e-12	BM	Book
chr1	122436010	122436709	176.077	89.1633	88.2671	33.3871	80.2359	18.1096	122436337	122436311	122436322	+	17.0877	3.33251	-0.989673	2.34284	5.94183e-29	0.00623417	6.52289e-14	3.45129e-28	0.00967237	3.55797e-13	BA	Book
chr1	122446301	122446982	97.1703	49.5885	33.3488	16.5941	21.6782	6.6127	122446558	122446511	122446522	-	15.1754	2.21555	-0.96165	1.2539	1.50214e-12	0.0148466	0.000192939	1.99609e-12	0.0215737	0.000399548	L	Lost
chr1	122509499	122510328	105.27	48.8233	32.9013	15.0535	24.0885	7.01196	122509852	122509824	122509835	+	13.386	2.42089	-1.113	1.30789	1.55777e-17	0.00195427	2.66839e-05	3.18163e-17	0.00331421	6.10481e-05	L	Lost
chr1	122510617	122511301	85.6867	29.9082	30.7969	10.034	28.3892	0	122510852	122510853	122510864	-	13.7193	2.17826	-1.51175	0.666515	6.00726e-09	0.00179428	0.105859	6.53619e-09	0.00306203	0.146563	L	Lost
chr1	122540490	122540733	31.2586	5.40214	22.9214	2.99183	15.3801	0	122540619	0	0	0	0	2.59803	-2.48527	0.112765	1.48098e-12	2.5954e-05	0.841537	1.96844e-12	6.40648e-05	0.875096	L	Lost
chr1	122540943	122541509	76.9732	26.5286	31.1969	7.42985	20.242	0	122541297	122541270	122541281	-	10.0877	2.28851	-1.5113	0.777211	4.66362e-14	0.000165105	0.0278547	6.98124e-14	0.000342284	0.0430592	L	Lost
chr1	122577072	122577666	48.314	56.8347	22.5024	22.0957	12.751	10.4527	122577185	122577137	122577148	-	17.8772	1.69294	0.224947	1.91789	1.23418e-08	0.529288	2.32857e-10	1.32706e-08	0.570913	8.87912e-10	BS	Book
chr1	122600845	122601100	46.6617	5.97858	34.5821	3.37443	23.2152	0	122600977	122601008	122601019	+	14.3158	2.6195	-2.84351	-0.224005	5.79758e-11	3.90792e-06	0.693598	6.95894e-11	1.19445e-05	0.750961	L	Lost
chr1	122638030	122638972	136.881	55.4778	39.1388	13.3191	29.7461	7.32246	122638693	122638438	122638449	-	11.1754	2.50451	-1.30118	1.20333	1.16429e-20	0.000141099	4.68202e-05	3.19461e-20	0.00029641	0.000104338	L	Lost
chr1	122655956	122656498	147.042	11.674	91.6095	4.43802	82.039	0	122656163	0	0	0	0	3.55479	-3.64477	-0.0899776	2.52527e-24	1.0456e-12	0.846836	9.70221e-24	2.18341e-11	0.87962	L	Lost
chr1	122665927	122666726	124.144	41.5873	45.3905	14.4771	44.9728	4.69983	122666285	122666237	122666248	+	17.9123	2.77317	-1.5856	1.18757	1.67928e-27	1.58508e-06	5.62646e-05	8.61292e-27	5.40135e-06	0.000124234	L	Lost
chr1	122901979	122902333	47.8903	8.58782	28.3114	5.78982	32.1256	0	122902097	122902047	122902058	+	9.64912	2.89421	-2.49835	0.395857	4.02816e-19	5.0153e-07	0.404946	9.5579e-19	1.97636e-06	0.480842	L	Lost
chr1	122983618	122984786	271.281	84.9039	66.2122	21.8075	52.2181	9.98165	122984261	122984210	122984221	-	13.9474	3.11546	-1.67348	1.44198	2.8452e-30	1.00602e-06	7.73039e-07	1.85132e-29	3.63395e-06	2.07413e-06	L	Lost
chr1	122991608	122992247	71.1737	25.7634	30.3921	9.16934	27.4402	0	122991977	122991945	122991956	+	14.3158	2.96365	-1.47638	1.48727	1.39994e-17	0.000790885	0.000157904	2.87173e-17	0.00143914	0.000330331	L	Lost
chr1	123019921	123020368	47.4523	7.62369	20.8311	4.34364	11.8101	0	123020117	0	0	0	0	1.96396	-2.68362	-0.719655	3.81518e-10	3.44662e-07	0.141611	4.37811e-10	1.41981e-06	0.190496	L	Lost
chr1	123077540	123078585	164.602	344.984	61.2649	99.0035	68.0345	72.1777	123078077	123078026	123078037	+	18.1053	3.05541	1.06443	4.11984	1.00957e-27	0.00109584	4.25794e-50	5.27933e-27	0.00194289	1.48953e-47	BM	Book
chr1	123327825	123328631	65.2508	48.6345	20.4121	16.4997	22.8123	7.92375	123328344	123328261	123328272	-	14.5789	2.10326	-0.433535	1.66972	1.63084e-08	0.345765	1.6456e-05	1.74688e-08	0.389235	3.85529e-05	L	Lost
chr1	123603528	123604024	44.5573	7.71807	22.9119	2.99183	17.5127	0	123603652	123604010	123604021	-	18.1053	2.3695	-2.50628	-0.136782	2.56956e-14	7.15473e-07	0.774311	3.93629e-14	2.69907e-06	0.819573	L	Lost
chr1	123739142	123739801	129.648	21.0321	53.3894	6.36627	70.8103	0	123739435	123739667	123739678	-	6.73684	3.53322	-2.61146	0.921765	7.17292e-31	2.47454e-10	0.0147318	4.9271e-30	2.58604e-09	0.0237943	L	Lost
chr1	124174598	124175044	30.0111	58.9567	14.5984	22.389	10.2825	15.8928	124174869	124174820	124174831	-	8.64912	1.97992	0.968246	2.94816	5.27801e-08	0.0190908	5.4396e-17	5.57315e-08	0.0271846	4.15725e-16	BM	Book
chr1	124224855	124225344	108.66	8.87604	59.1035	3.28005	68.1232	0	124225101	124225018	124225029	-	5.57895	3.37206	-3.59869	-0.226638	1.29929e-29	1.39789e-13	0.62308	7.99869e-29	3.68567e-12	0.689168	L	Lost
chr1	124503791	124505048	396.415	113.361	112.507	26.9214	121.132	19.9802	124504080	124504478	124504489	+	14.1579	4.69119	-1.80057	2.89062	7.98179e-76	1.98486e-09	1.16352e-26	1.8679e-73	1.58106e-08	2.63388e-25	BA	Book
chr1	124961691	124962389	80.8675	13.4084	40.4195	4.43802	41.2064	0	124961959	124962351	124962362	-	4.19298	3.23578	-2.55319	0.682589	2.6479e-20	1.42135e-07	0.125235	7.01578e-20	6.54775e-07	0.17053	L	Lost
chr1	124968405	124968734	62.4934	5.2083	45.4048	2.79799	47.9872	0	124968555	124968563	124968574	+	7.03509	3.65522	-3.49383	0.161383	1.42561e-26	1.12529e-09	0.773982	6.71503e-26	9.64496e-09	0.819325	L	Lost
chr1	125624070	125624358	36.2865	7.71807	21.2596	4.63186	12.5339	0	125624246	125624229	125624240	-	3.5614	1.98717	-2.20964	-0.222471	7.27654e-10	1.85258e-05	0.643108	8.24148e-10	4.74908e-05	0.706746	L	Lost
chr1	125630487	125630889	39.591	31.3594	20.4216	13.6023	17.3622	9.08774	125630712	125630687	125630698	-	9.50877	2.80396	-0.34401	2.45995	1.66077e-15	0.400402	5.06133e-11	2.81703e-15	0.444829	2.06401e-10	L	Lost
chr1	126178405	126178645	31.287	14.9592	21.2928	7.81753	29.3014	0	126178521	126178534	126178545	-	8.2807	2.91012	-1.11161	1.79851	4.65338e-13	0.0257191	0.000109126	6.43007e-13	0.0357895	0.00023295	L	Lost
chr1	126304731	126305072	43.3335	6.56011	31.2728	3.47389	30.5688	0	126304868	126304884	126304895	+	9.70175	3.35943	-2.69116	0.668265	1.68878e-20	9.23278e-07	0.212043	4.56145e-20	3.36877e-06	0.273012	L	Lost
chr1	126828731	126829203	28.3398	68.8071	13.3367	31.3594	7.66722	19.2834	126828967	126828918	126828929	+	15.5614	2.04563	1.26962	3.31525	1.00151e-06	0.00779516	1.71716e-16	1.02793e-06	0.0118946	1.23989e-15	BM	Book
chr1	127125065	127126142	58.3034	97.4578	18.3172	26.0517	16.7036	16.501	127125728	127125676	127125687	-	18.4737	1.72365	0.734615	2.45826	4.18831e-10	0.0232953	1.28804e-19	4.79883e-10	0.0326644	1.29656e-18	BM	Book
chr1	127279241	127279871	167.811	56.5464	88.7145	23.4475	81.0611	9.61597	127279429	127279426	127279437	-	16.3333	3.42809	-1.58246	1.84564	1.38901e-40	6.77058e-07	1.20738e-10	2.17137e-39	2.57225e-06	4.73973e-10	L	Lost
chr1	127282802	127283544	72.4449	89.7296	21.6596	24.024	12.6305	10.7992	127283141	0	0	0	0	1.87495	0.309487	2.18444	1.80604e-09	0.410432	3.4562e-12	2.00833e-09	0.454929	1.58855e-11	BS	Book
chr1	127429563	127429760	24.1499	0.482062	22.8976	0.482062	20.3208	0	127429677	0	0	0	0	4.20194	-5.41566	-1.21372	1.30901e-17	0.000163437	0.404652	2.69073e-17	0.000339096	0.480615	L	Lost
chr1	127457938	127458909	95.3663	81.6238	27.4829	19.1039	13.9953	9.5304	127458396	127458374	127458385	-	9	1.84452	-0.222191	1.62233	9.7692e-12	0.505613	7.67997e-09	1.22955e-11	0.548209	2.51792e-08	L	Lost
chr1	127535636	127535917	38.2771	6.94779	24.1404	4.8257	14.5499	0	127535802	127535834	127535845	+	3.82456	1.96504	-2.49329	-0.528253	8.20962e-09	7.64582e-06	0.306649	8.88433e-09	2.16728e-05	0.378355	L	Lost
chr1	127611230	127611692	65.7457	44.778	28.2687	17.2751	29.0008	8.39308	127611455	127611439	127611450	+	16.5614	2.47964	-0.57473	1.90491	4.16139e-14	0.151736	4.67025e-08	6.25868e-14	0.183612	1.41623e-07	L	Lost
chr1	127611833	127612431	161.931	22.2896	84.9388	8.2996	96.6351	0	127612131	127612206	127612217	+	4.75439	3.58956	-2.87354	0.71602	2.68035e-39	3.98796e-14	0.0413769	3.79126e-38	1.22354e-12	0.0620571	L	Lost
chr1	127641306	127641717	49.6279	7.42985	24.1973	3.47389	20.1283	0	127641484	0	0	0	0	2.70941	-2.75502	-0.0456071	1.28634e-13	1.07072e-06	0.930952	1.85395e-13	3.83946e-06	0.947453	L	Lost
chr1	127661627	127662267	115.793	58.9517	50.7995	17.9459	56.4022	10.1377	127661773	127661775	127661786	-	18.1053	3.35407	-0.972988	2.38108	1.2014e-29	0.00611399	6.31106e-14	7.41357e-29	0.0095011	3.44796e-13	BA	Book
chr1	127884476	127885283	57.9129	80.7693	19.9789	25.664	18.2298	15.8475	127884789	127884802	127884813	-	11.0877	2.08472	0.46886	2.55359	3.48908e-12	0.182399	1.55572e-17	4.52736e-12	0.217403	1.25274e-16	BS	Book
chr1	127948152	127949290	97.8185	97.5624	20.3979	32.5225	17.3899	17.0819	127948231	127948842	127948853	-	17.8772	2.35443	-0.0138459	2.34058	3.7867e-15	0.969374	1.76006e-14	6.22579e-15	0.97348	1.02197e-13	BS	Book
chr1	128025627	128026628	290.336	22.4732	121.659	7.04217	128.069	0	128025936	128026038	128026049	-	4.38596	4.53244	-3.65561	0.876838	3.9631e-30	1.89531e-12	0.0538247	2.54552e-29	3.64176e-11	0.0789059	L	Lost
chr1	128046554	128047134	106.346	17.6526	36.2818	7.23601	41.1233	0	128046819	128046956	128046967	-	3.73684	3.30916	-2.54868	0.760476	8.21065e-28	1.09188e-09	0.0486372	4.32762e-27	9.3942e-09	0.071957	L	Lost
chr1	128566848	128567355	32.5155	59.3444	15.4174	22.4834	10.9945	13.206	128566978	128567021	128567032	+	17.8772	2.0751	0.861361	2.93646	1.36773e-07	0.0581458	2.63024e-14	1.42914e-07	0.0760596	1.49451e-13	BS	Book
chr1	128571230	128571992	109.169	24.9932	36.658	6.56011	33.7765	0	128571680	128571377	128571388	-	8.38596	2.86773	-2.15274	0.714993	5.94407e-27	4.1268e-09	0.0322888	2.90174e-26	3.00956e-08	0.0493494	L	Lost
chr1	129101169	129101761	71.6401	36.6672	34.9868	12.0617	23.6167	0	129101385	129101375	129101386	-	8.85965	2.34347	-0.977649	1.36582	1.41011e-16	0.00654884	1.73097e-05	2.63284e-16	0.0101212	4.04665e-05	L	Lost
chr1	129125310	129126353	270.586	262.072	100.733	79.9889	111.673	64.4467	129125816	129125771	129125782	-	17.8772	3.50441	-0.0485955	3.45582	5.58525e-43	0.871643	5.26124e-41	1.06117e-41	0.887892	6.63679e-39	BS	Book
chr1	129131344	129132421	257.74	47.7597	125.325	13.6023	138.562	8.26418	129131879	129131889	129131900	-	16.3333	3.96275	-2.43137	1.53138	1.47943e-42	3.38168e-11	2.45487e-06	2.72834e-41	4.55902e-10	6.27977e-06	L	Lost
chr1	129134302	129134597	51.247	11.5796	31.6491	8.10575	29.5783	0	129134429	129134422	129134433	+	13.0175	2.62509	-2.17409	0.450999	1.31908e-16	2.82908e-06	0.29809	2.47077e-16	8.98578e-06	0.368975	L	Lost
chr1	129158729	129159205	48.752	8.10575	22.5166	3.47389	17.3203	0	129158926	129158972	129158983	-	1.36842	2.03241	-2.62039	-0.58798	7.72091e-12	1.64873e-07	0.209038	9.78026e-12	7.43572e-07	0.269635	L	Lost
chr1	129217260	129218568	251.64	142.807	57.856	31.4538	43.6543	19.143	129217754	129217756	129217767	+	17.8772	2.89585	-0.821736	2.07411	1.58172e-37	0.00296445	2.05004e-18	1.89055e-36	0.00486929	1.80686e-17	BA	Book
chr1	129393418	129393688	69.1878	15.1479	59.1746	12.3499	45.9582	2.45981	129393574	129393574	129393585	-	14.5789	3.1006	-2.18918	0.911418	6.50816e-16	1.88529e-05	0.0483444	1.1461e-15	4.82238e-05	0.0715582	L	Lost
chr1	129403712	129404505	130.329	21.226	58.2655	8.9755	47.593	0	129404098	129404104	129404115	+	7.7193	2.39766	-2.61215	-0.21449	4.6719e-20	7.10077e-12	0.531156	1.20804e-19	1.15842e-10	0.604296	L	Lost
chr1	129491503	129491843	55.4227	19.1039	33.3298	8.9755	27.5266	0	129491687	129491658	129491669	+	17.8772	3.12965	-1.53527	1.59438	3.9302e-21	0.000277059	5.55232e-05	1.12505e-20	0.000548637	0.000122677	L	Lost
chr1	129532864	129533454	35.7821	57.9926	14.1509	20.9428	12.691	16.4551	129533056	129533071	129533082	+	17.8772	2.71635	0.688541	3.40489	1.26251e-13	0.0876748	4.89829e-21	1.82107e-13	0.110898	5.79344e-20	BS	Book
chr1	129624376	129624828	67.0359	39.3657	40.8195	23.3531	43.8764	11.3175	129624679	129624667	129624678	-	16.5614	3.7289	-0.76777	2.96113	2.44519e-30	0.0343058	3.51492e-17	1.60395e-29	0.0467297	2.74693e-16	BA	Book
chr1	129665108	129665951	107.003	107.974	37.0391	38.2078	38.5836	32.1719	129665525	129665364	129665375	-	12.9298	2.91987	0.00981988	2.92969	6.27548e-19	0.979899	1.44184e-18	1.46385e-18	0.982534	1.2899e-17	BS	Book
chr1	129669374	129670692	273.124	178.977	74.4877	45.5432	85.3388	37.868	129669972	129670012	129670023	+	16.3509	3.31947	-0.609274	2.71019	1.21081e-36	0.0542086	7.62233e-24	1.3502e-35	0.0713328	1.23874e-22	BS	Book
chr1	129680372	129680792	75.7399	14.9592	35.3584	7.33547	34.7901	0	129680608	129680660	129680671	-	3.84211	2.85383	-2.39217	0.461658	8.28662e-19	1.55232e-07	0.269111	1.91052e-18	7.06467e-07	0.337376	L	Lost
chr1	129723264	129724235	184.881	109.808	43.7098	28.7553	34.1536	19.7815	129723741	129723701	129723712	+	18.4737	2.99143	-0.755773	2.23566	2.70406e-26	0.027761	2.27833e-14	1.2438e-25	0.0384057	1.30634e-13	BA	Book
chr1	129801171	129801822	69.221	9.16426	34.1868	3.08621	27.296	0	129801557	0	0	0	0	2.58363	-2.87535	-0.291719	1.40629e-14	2.56154e-08	0.539062	2.20129e-14	1.47398e-07	0.611895	L	Lost
chr1	129848653	129849160	60.8316	41.5822	22.5071	15.7244	15.9782	5.79276	129848915	129848984	129848995	-	16.3333	2.43491	-0.539394	1.89552	5.09901e-18	0.115101	5.56633e-10	1.08704e-17	0.142508	2.04529e-09	L	Lost
chr1	129877509	129877793	35.8153	7.71807	22.8882	3.76211	17.8319	0	129877642	129877634	129877645	+	8.26316	2.52526	-2.19198	0.333288	2.36113e-13	2.90203e-05	0.500786	3.33181e-13	7.07432e-05	0.575318	L	Lost
chr1	129894632	129895608	116.903	21.5142	32.0444	5.78982	35.2873	0	129895273	129895214	129895225	+	12.9123	2.69217	-2.4271	0.265064	1.51578e-20	1.92361e-09	0.46421	4.11546e-20	1.54056e-08	0.539786	L	Lost
chr1	129897605	129897849	70.0211	3.56827	60.8411	2.60415	61.1406	0	129897729	129897801	129897812	-	2.21053	5.51613	-4.17487	1.34126	1.85237e-33	3.52198e-10	0.058019	1.58409e-32	3.53375e-09	0.0845621	L	Lost
chr1	129913963	129914556	63.7124	48.4356	24.5689	15.4361	19.8764	9.82042	129914127	129914150	129914161	+	11.0702	2.65305	-0.395969	2.25708	8.71895e-16	0.316042	7.05457e-11	1.51855e-15	0.358779	2.83528e-10	L	Lost
chr1	129994243	129994591	39.8772	16.112	24.0977	8.10575	37.0021	0	129994409	129994384	129994395	+	13.7193	3.90283	-1.30034	2.60249	1.36046e-16	0.0174946	6.81864e-07	2.54405e-16	0.0250779	1.84071e-06	L	Lost
chr1	129998832	129999319	83.7862	26.5337	38.7862	9.84016	27.4066	0	129999130	129999061	129999072	-	9.12281	2.30323	-1.66108	0.642147	1.26146e-16	9.76253e-06	0.0549198	2.36729e-16	2.68824e-05	0.0803863	L	Lost
chr1	130005446	130005962	59.9842	12.832	25.3926	6.46573	26.5802	0	130005666	130005650	130005661	-	13.7193	2.88898	-2.21665	0.672334	7.43365e-20	8.64687e-07	0.110548	1.88342e-19	3.18415e-06	0.152426	L	Lost
chr1	130010605	130011329	72.8117	24.3122	22.8929	6.27189	17.7551	0	130010847	130010873	130010884	-	15.7895	2.69523	-1.5714	1.12383	1.4716e-15	0.000330419	0.00380036	2.50858e-15	0.000645636	0.00669871	L	Lost
chr1	130240583	130241508	115.016	44.8673	54.1609	21.3203	54.4353	14.7973	130240998	130241205	130241216	+	13.386	3.25929	-1.36291	1.89638	1.21708e-29	0.000125498	3.00762e-09	7.50757e-29	0.000266507	1.02539e-08	BA	Book
chr1	130288757	130289485	458.785	31.2549	283.017	11.4802	178.916	5.27483	130289178	130289250	130289261	+	13.8596	4.78941	-3.85341	0.935997	1.92025e-49	1.09892e-19	0.0125792	6.11829e-48	1.63551e-17	0.0205543	L	Lost
chr1	130296114	130297891	220.453	59.1455	93.3994	12.6382	93.8557	10.1377	130297037	130296864	130296875	-	16.5614	3.32391	-1.89851	1.42541	2.05971e-34	3.34062e-08	2.04682e-06	1.91328e-33	1.8571e-07	5.2721e-06	BA	Book
chr1	130355524	130356318	133.733	18.91	36.277	5.59598	29.6295	0	130356214	130355744	130355755	-	9.73684	2.91882	-2.81262	0.106201	2.46364e-24	7.39895e-12	0.775015	9.47292e-24	1.20258e-10	0.820062	L	Lost
chr1	130488353	130488819	63.3456	37.3329	23.7451	14.3726	11.2426	5.50322	130488651	130488650	130488661	-	8.22807	2.09134	-0.740559	1.35078	6.02639e-12	0.0529982	4.71298e-05	7.68773e-12	0.0698728	0.000104993	L	Lost
chr1	130496256	130497318	169.158	157.777	64.6073	46.2191	61.8518	36.5388	130496797	130496756	130496767	+	18.1053	2.91739	-0.107028	2.81036	9.49052e-26	0.747562	2.6343e-23	4.15163e-25	0.775739	4.03019e-22	BS	Book
chr1	130667935	130668335	37.0628	43.2222	20.4026	17.27	13.8218	11.1471	130668186	130668138	130668149	-	17.8772	2.34424	0.229027	2.57327	1.90613e-11	0.570897	4.21738e-13	2.35665e-11	0.61063	2.12327e-12	BS	Book
chr1	130731701	130731986	37.0533	30.6784	24.5594	14.472	16.9295	5.48144	130731868	130731831	130731842	-	16.3333	1.8604	-0.254644	1.60576	4.28362e-09	0.513515	2.24355e-06	4.68498e-09	0.555594	5.75961e-06	L	Lost
chr1	130756689	130757241	82.5103	17.9459	31.687	7.42985	22.3809	0	130756868	130757091	130757102	+	-0.350877	2.29735	-2.19779	0.0995551	1.80326e-16	4.96107e-08	0.785016	3.3357e-16	2.61607e-07	0.828243	L	Lost
chr1	130898477	130898818	38.734	5.69036	23.3261	2.41031	12.751	0	130898619	130898664	130898675	+	9.64912	2.48223	-2.66938	-0.187149	2.02787e-13	2.0571e-06	0.726027	2.87663e-13	6.78625e-06	0.778496	L	Lost
chr1	130968820	130969117	35.4058	11.674	23.7356	5.98367	10.8794	0	130969022	130969030	130969041	-	10.8246	1.84888	-1.58895	0.259938	2.47556e-08	0.000855345	0.546659	2.6368e-08	0.00154673	0.619028	L	Lost
chr1	131003585	131004083	77.1345	8.00629	35.42	4.43802	27.3641	0	131003912	131003697	131003708	+	4.22807	2.57453	-3.21132	-0.636783	3.25216e-17	2.25438e-10	0.178094	6.45505e-17	2.38832e-09	0.233754	L	Lost
chr1	131436938	131437864	115.035	52.968	30.8538	20.7439	37.0826	12.4728	131437547	131437127	131437138	-	16.5614	3.2639	-1.11489	2.14902	3.35806e-26	0.00290496	9.16046e-11	1.5324e-25	0.00477795	3.63898e-10	BA	Book
chr1	131723259	131723813	55.3989	33.7647	25.8591	12.9264	20.9466	9.15121	131723709	131723681	131723692	+	8.26316	2.47753	-0.694826	1.7827	5.49046e-15	0.0746669	2.55421e-07	8.9019e-15	0.0956897	7.17901e-07	L	Lost
chr1	131827656	131827948	31.6538	20.4557	21.2454	9.74578	14.9233	3.84553	131827824	131827826	131827837	+	5.57895	2.43177	-0.637532	1.79424	4.79375e-12	0.139405	5.0797e-06	6.15484e-12	0.170012	1.25744e-05	L	Lost
chr1	132446821	132447713	145.794	39.7483	42.5003	7.71807	30.6312	0	132447415	132447045	132447056	+	9.19298	2.46905	-1.86392	0.605128	5.08e-20	1.68676e-07	0.0513242	1.30948e-19	7.59011e-07	0.0755567	L	Lost
chr1	132613387	132613968	66.5837	84.1438	27.9208	34.8333	28.7094	23.0099	132613790	132613613	132613624	+	3.73684	2.22569	0.332069	2.55776	3.59979e-10	0.434131	7.53338e-13	4.13541e-10	0.478354	3.69675e-12	BS	Book
chr1	132669240	132669714	17.9266	47.4715	7.92295	21.8075	3.08008	13.1101	132669441	132669537	132669548	-	13.5789	1.28463	1.40337	2.688	0.000511505	0.000684434	1.47006e-15	0.00051367	0.0012588	9.56175e-15	BM	Book
chr1	132722479	132722860	48.7235	8.10575	30.4206	3.95596	23.1314	0	132722730	132722770	132722781	-	6.82456	2.46292	-2.61991	-0.156991	5.5195e-16	1.53295e-07	0.739743	9.7885e-16	6.9888e-07	0.790206	L	Lost
chr1	132884546	132885528	161.65	291.011	59.5652	76.515	55.8326	69.0454	132884978	132884781	132884792	-	17.0877	3.45746	0.846708	4.30417	1.38333e-42	0.0027394	2.97058e-66	2.55668e-41	0.00452252	6.72005e-63	BM	Book
chr1	132938830	132939304	57.0417	53.6439	25.8211	25.1819	20.3379	13.6019	132939024	132939021	132939032	+	7.89474	2.43671	-0.0860693	2.35064	6.04145e-13	0.830951	1.57597e-11	8.26999e-13	0.851092	6.77356e-11	BS	Book
chr1	132992628	132993396	94.1757	87.4136	22.0834	22.5778	14.1301	11.7534	132992789	132992751	132992762	+	12.5614	2.23142	-0.105622	2.12579	4.45239e-19	0.725169	2.11572e-16	1.05218e-18	0.755214	1.5143e-15	BS	Book
chr1	133035739	133036579	330.303	91.4589	130.805	30.3851	126.599	27.872	133036187	133036160	133036171	-	12.5614	3.94038	-1.84665	2.09373	1.14248e-42	1.80715e-07	7.06874e-12	2.12427e-41	8.05385e-07	3.14947e-11	BA	Book
chr1	133043847	133044675	84.4629	52.4859	26.6449	14.1838	20.4449	5.67609	133044459	133044454	133044465	+	11.5439	2.30417	-0.683578	1.62059	5.0767e-13	0.0838937	1.62722e-06	6.99592e-13	0.106569	4.23374e-06	L	Lost
chr1	133046589	133047135	70.3215	48.0479	37.8534	27.0158	49.118	19.8634	133047015	133047021	133047032	+	17.3158	2.8101	-0.54634	2.26376	1.15795e-19	0.139829	6.14916e-12	2.87923e-19	0.170487	2.75676e-11	BS	Book
chr1	133057809	133058362	88.7572	21.708	33.3346	6.07804	18.0577	0	133057937	133058095	133058106	+	2.66667	2.11545	-2.02374	0.0917113	3.54003e-12	1.50923e-06	0.80445	4.59084e-12	5.16882e-06	0.844023	L	Lost
chr1	133140544	133141239	114.569	71.6	33.3156	17.1756	23.5903	6.43251	133140790	133140769	133140780	-	14.5789	2.52534	-0.688447	1.8369	1.73664e-20	0.0395702	1.98141e-10	4.68399e-20	0.0533763	7.6118e-10	L	Lost
chr1	133156129	133156860	138.243	61.9486	42.067	19.4916	41.8586	7.48558	133156452	133156455	133156466	-	11.2105	2.78429	-1.16699	1.6173	3.50132e-26	0.000378125	1.72997e-08	1.59584e-25	0.000731527	5.48577e-08	L	Lost
chr1	133284927	133285556	115.831	46.7956	54.5515	21.8024	56.2966	17.2305	133285273	133285293	133285304	-	16.5263	3.43863	-1.30856	2.13008	6.47303e-34	0.000139208	1.07562e-11	5.77265e-33	0.000292788	4.69684e-11	BA	Book
chr1	133375072	133376155	313.386	44.9668	154.25	13.3141	163.345	6.26699	133375565	133375652	133375663	+	8	4.29337	-2.81336	1.48001	1.41093e-53	2.43213e-15	3.43757e-06	6.34976e-52	1.0368e-13	8.66439e-06	L	Lost
chr1	133418663	133419547	81.2153	89.8341	18.3409	22.5778	12.3894	14.3166	133419432	133419118	133419129	-	18.4737	2.32725	0.140508	2.46775	7.45954e-15	0.693588	4.50572e-16	1.19534e-14	0.725868	3.09499e-15	BS	Book
chr1	133458582	133458919	38.2771	7.14163	24.1167	3.95596	25.3045	0	133458704	133458718	133458729	-	8.26316	2.4849	-2.48148	0.00342562	8.81649e-12	1.22449e-05	0.994854	1.11236e-11	3.28672e-05	0.995998	L	Lost
chr1	133473581	133473970	49.5852	41.0057	25.4116	19.8742	26.7977	13.4493	133473753	133473794	133473805	+	10.5789	2.93097	-0.273174	2.6578	1.86065e-16	0.508646	9.09557e-13	3.4383e-16	0.550994	4.42304e-12	BS	Book
chr1	133641706	133642825	368.785	129.488	90.8475	22.9655	75.7189	13.6019	133642069	133642029	133642040	-	12.9123	3.529	-1.51277	2.01623	1.77451e-53	8.15049e-08	1.36036e-16	7.93337e-52	4.04402e-07	9.91645e-16	BA	Book
chr1	133693505	133694159	126.192	39.6539	49.552	17.4639	37.9841	5.90786	133693640	133693630	133693641	+	12.9123	2.72291	-1.66638	1.05653	4.23875e-19	2.1447e-05	0.00193143	1.00386e-18	5.40764e-05	0.00353712	L	Lost
chr1	133717027	133717830	90.3573	15.9182	27.4734	4.43802	16.636	0	133717275	133717084	133717095	+	13.4211	2.53946	-2.48332	0.0561402	4.57006e-18	5.51993e-09	0.884608	9.79138e-18	3.87962e-08	0.910225	L	Lost
chr1	133720092	133720614	72.0496	16.7879	31.2491	7.33547	17.2124	0	133720413	133720110	133720121	+	3.7193	2.02819	-2.09659	-0.0684048	4.95372e-13	3.21852e-07	0.853384	6.832e-13	1.33712e-06	0.884999	L	Lost
chr1	133721046	133721614	62.5408	28.944	23.3451	9.93962	11.781	0	133721346	133721411	133721422	+	9.59649	1.66511	-1.10341	0.561702	2.97526e-09	0.00314242	0.0840934	3.2778e-09	0.00513788	0.118833	L	Lost
chr1	133746591	133747302	79.9061	83.6566	30.7969	25.4752	28.3097	14.4106	133746893	133746921	133746932	-	17.8772	2.22586	0.0628801	2.28874	2.96913e-12	0.869999	1.71743e-12	3.87194e-12	0.886537	8.13138e-12	BS	Book
chr1	133754701	133755667	102.032	28.4671	37.5198	9.06988	29.486	0	133755045	133755045	133755056	+	6.50877	2.40193	-1.8612	0.540722	3.42783e-15	4.78288e-06	0.129102	5.65605e-15	1.42968e-05	0.17538	L	Lost
chr1	133786363	133788472	1256.85	336.361	257.049	63.4841	206.467	47.5282	133786868	133787182	133787193	-	14.1579	4.76376	-1.90282	2.86094	7.45156e-85	1.5781e-10	2.38834e-30	3.95084e-82	1.74088e-09	8.45007e-29	BA	Book
chr1	133788855	133789590	124.987	76.2217	44.9952	20.8383	36.8306	16.5268	133789085	133789089	133789100	+	13.7193	2.7556	-0.711992	2.0436	4.89166e-23	0.036222	3.66335e-12	1.6694e-22	0.0491747	1.67894e-11	BA	Book
chr1	133804639	133805988	221.034	222.885	48.7045	55.1003	52.429	44.9563	133805409	133805401	133805412	-	17.0877	3.19995	0.01124	3.21119	8.40118e-30	0.973377	1.74018e-29	5.25585e-29	0.976832	5.47262e-28	BS	Book
chr1	133806289	133806872	95.0516	36.861	33.3535	11.0032	33.691	6.35078	133806589	133806618	133806629	+	9.47368	3.314	-1.3809	1.9331	3.54958e-30	0.000109827	3.91076e-09	2.2925e-29	0.000235842	1.31808e-08	L	Lost
chr1	133807753	133808112	71.2401	45.732	37.496	22.9655	21.4725	11.7534	133807872	133807925	133807936	-	3.98246	2.43566	-0.636431	1.79923	6.16413e-11	0.165285	4.12695e-06	7.38559e-11	0.198661	1.03229e-05	BS	Book
chr1	133842961	133843566	164.069	34.1625	75.7731	11.6791	78.4286	3.52609	133843224	133843247	133843258	-	14.1579	3.11548	-2.2915	0.823979	1.06382e-28	6.81662e-10	0.0124926	6.04768e-28	6.27022e-09	0.0204167	L	Lost
chr1	133866947	133867562	67.4454	27.5029	21.6407	8.10575	16.7425	0	133867260	133867256	133867267	-	13.7895	1.87352	-1.32043	0.553099	3.56833e-10	0.000904352	0.110949	4.09982e-10	0.00162841	0.152917	L	Lost
chr1	133899564	133900572	139	41.5822	36.2201	10.6155	23.1702	2.68802	133900087	133899911	133899922	-	10.0351	2.93389	-1.73406	1.19983	6.27981e-22	8.57831e-06	0.000408932	1.9358e-21	2.39993e-05	0.000814001	L	Lost
chr1	133904740	133905550	99.6274	58.4696	34.9821	16.0177	19.3605	9.66212	133905183	133905234	133905245	+	4.12281	2.26177	-0.768436	1.49333	5.42647e-12	0.0600971	1.549e-05	6.94278e-12	0.0783703	3.63778e-05	L	Lost
chr1	133913339	133914302	116.574	89.1633	29.9636	21.6136	28.4673	12.3456	133913860	133913866	133913877	+	16.1579	2.72943	-0.394885	2.33454	7.9892e-20	0.274614	4.57584e-14	2.0189e-19	0.315752	2.53879e-13	BS	Book
chr1	133986204	133986714	69.9025	16.0177	27.8639	6.27189	20.136	0	133986559	133986503	133986514	+	12.9298	2.47853	-2.13794	0.340587	1.49337e-12	9.5903e-06	0.428572	1.98459e-12	2.64661e-05	0.504343	L	Lost
chr1	134007883	134008803	110.369	63.1015	36.6391	15.4361	29.4703	9.14187	134008415	134008388	134008399	+	16.1579	2.08634	-0.807017	1.27933	3.92215e-11	0.0415132	0.000121705	4.76003e-11	0.0558109	0.000258194	L	Lost
chr1	134009886	134011167	198.994	93.8946	47.8428	24.9982	49.24	16.7234	134010681	134010648	134010659	-	12.2632	2.54283	-1.09529	1.44754	8.21963e-23	0.00071233	1.34951e-07	2.74849e-22	0.00130643	3.91426e-07	BA	Book
chr1	134038316	134039069	111.584	103.337	26.6354	27.1153	19.4976	13.5536	134038862	134038850	134038861	-	15.1754	2.7571	-0.112055	2.64505	1.50039e-25	0.718804	1.69252e-22	6.44545e-25	0.749207	2.34036e-21	BS	Book
chr1	134053592	134054601	124.982	84.5162	35.4533	23.6363	18.9941	17.5022	134054233	134053679	134053690	-	9.73684	2.00152	-0.561117	1.4404	4.34117e-11	0.137562	4.9104e-06	5.25465e-11	0.168013	1.21766e-05	BS	Book
chr1	134055018	134055688	190.723	38.9831	101.58	10.8094	94.8175	0	134055464	134055415	134055426	-	4.80702	2.84942	-2.29945	0.549966	8.0681e-21	8.77278e-09	0.110823	2.247e-20	5.80173e-08	0.152769	L	Lost
chr1	134084040	134084594	87.0718	18.7162	33.7488	6.46573	15.555	0	134084280	134084544	134084555	-	2.21053	2.16638	-2.20019	-0.0338112	1.72739e-13	1.43842e-07	0.927765	2.46325e-13	6.61202e-07	0.944833	L	Lost
chr1	134091752	134092581	118.697	62.2215	24.5736	13.3141	11.9337	4.36591	134092459	134092441	134092452	-	4.73684	1.97912	-0.918946	1.06017	4.02165e-10	0.021382	0.00153113	4.61067e-10	0.0301736	0.00284308	L	Lost
chr1	134094098	134094936	102.103	52.2921	34.5631	10.034	20.9312	2.81987	134094369	0	0	0	0	1.89851	-0.961146	0.937363	5.09941e-09	0.0196869	0.0067803	5.56339e-09	0.0279723	0.0115095	L	Lost
chr1	134096567	134098844	392.868	311.452	78.3393	39.9472	50.8463	24.3388	134097679	134098020	134098031	-	8.35088	2.19138	-0.334938	1.85644	1.63891e-15	0.325684	2.45787e-11	2.78107e-15	0.36875	1.03645e-10	BS	Book
chr1	134161212	134162300	162.021	129.96	33.3393	25.1819	19.6084	14.7154	134161298	134161593	134161604	+	10.0351	2.28371	-0.315371	1.96834	1.57905e-22	0.26933	4.08998e-16	5.14369e-22	0.310339	2.82544e-15	BS	Book
chr1	134162663	134163875	134.162	139.706	21.6834	22.1901	9.25047	12.4741	134163444	134162727	134162738	-	12.9123	2.06028	0.0599728	2.12025	5.6366e-14	0.857434	2.37771e-14	8.37347e-14	0.875179	1.3599e-13	BM	Book
chr1	134173718	134174194	83.5727	18.0454	38.2534	7.23601	39.0971	0	134173921	134173839	134173850	+	7.64912	2.53717	-2.23525	0.30191	1.2366e-13	1.98422e-06	0.468855	1.78537e-13	6.57717e-06	0.544329	L	Lost
chr1	134184793	134185345	142.542	27.9799	74.611	9.6514	71.0648	0	134185052	134185300	134185311	-	2.2807	2.85183	-2.34575	0.506083	1.66651e-18	5.60374e-08	0.179245	3.73414e-18	2.91286e-07	0.235093	L	Lost
chr1	134202572	134202938	62.4365	14.2833	34.9583	4.92008	17.0334	0	134202814	0	0	0	0	1.98089	-2.17783	-0.196941	1.47772e-10	1.66477e-06	0.630354	1.73363e-10	5.6361e-06	0.695513	L	Lost
chr1	134238276	134239626	583.797	203.588	185.243	67.7384	185.377	52.6348	134239044	134239107	134239118	-	18.1053	4.00522	-1.52064	2.48458	3.19832e-54	1.44756e-06	1.21979e-20	1.49078e-52	4.98578e-06	1.38478e-19	BA	Book
chr1	134316315	134316802	72.8734	14.2833	42.486	7.42985	41.9958	0	134316617	134316646	134316657	+	6.89474	3.35939	-2.39755	0.961845	2.7455e-22	3.83843e-07	0.0287801	8.74772e-22	1.56025e-06	0.0443726	L	Lost
chr1	134367387	134368465	1142.87	195.214	488.34	45.3545	288.236	30.8961	134367826	134368266	134368277	+	13.8421	5.51763	-2.55352	2.96411	7.19175e-81	3.2911e-13	3.53281e-23	2.39253e-78	7.82052e-12	5.31142e-22	BA	Book
chr1	134437356	134438343	242.275	74.3929	81.6485	19.4916	64.0898	6.27615	134437813	134437815	134437826	-	13.8947	2.85035	-1.70669	1.14366	1.07164e-25	7.66254e-07	0.000101055	4.66922e-25	2.86484e-06	0.000216757	L	Lost
chr1	134492289	134492752	79.1061	39.5596	39.5531	15.63	38.4536	7.25611	134492525	134492482	134492493	+	17.9123	2.69618	-1.00266	1.69352	1.41344e-22	0.00346541	4.06665e-08	4.62288e-22	0.00562155	1.24106e-07	L	Lost
chr1	134693894	134694540	100.418	68.4092	38.3625	24.4116	30.7558	12.5492	134694233	134694232	134694243	-	9.19298	2.51003	-0.555634	1.9544	9.85618e-20	0.099008	2.09055e-11	2.46667e-19	0.124178	8.88735e-11	BS	Book
chr1	134730652	134731211	62.0364	23.2588	28.3161	6.65957	16.3786	0	134730809	134730817	134730828	+	15.5614	1.74978	-1.45678	0.292996	1.0906e-08	0.000463365	0.420514	1.17491e-08	0.00087899	0.496493	L	Lost
chr1	134747273	134748236	282.404	39.2764	90.4237	11.0976	68.2357	0	134747661	134747434	134747445	+	7.35088	2.99078	-2.86572	0.125064	4.69282e-24	3.59505e-13	0.712456	1.75822e-23	8.47158e-12	0.766973	L	Lost
chr1	134748412	134748855	74.9209	25.1819	34.5204	11.5796	29.8574	0	134748647	134748651	134748662	+	14.5789	2.44979	-1.56912	0.88067	6.23719e-17	5.57837e-05	0.0114604	1.20583e-16	0.000127222	0.0188441	L	Lost
chr1	134749323	134750124	124.478	65.9045	40.8053	19.2033	42.6082	9.48271	134749767	134749657	134749668	+	14.807	3.25292	-0.92543	2.32749	8.66338e-32	0.00537198	4.50396e-15	6.44249e-31	0.00842597	2.77575e-14	L	Lost
chr1	134775369	134775923	142.395	12.3499	71.1927	3.95596	62.6309	0	134775786	134775735	134775746	-	0.0350877	2.75301	-3.52487	-0.771853	3.87941e-27	7.0699e-17	0.0495438	1.92738e-26	4.58706e-15	0.0731484	L	Lost
chr1	134785286	134785945	94.0808	17.27	34.1298	5.01954	29.1256	0	134785653	134785652	134785663	+	6.5614	2.31528	-2.43845	-0.123166	2.7097e-12	1.59334e-07	0.764402	3.54424e-12	7.22337e-07	0.811236	L	Lost
chr1	134819402	134820141	92.0902	54.4193	29.5826	17.5633	24.5431	9.14242	134819641	134819607	134819618	-	13.7193	2.81053	-0.762741	2.04779	2.27929e-25	0.0197654	2.48287e-12	9.64498e-25	0.028071	1.15698e-11	L	Lost
chr1	134844476	134844956	98.285	29.2373	44.981	12.9315	38.7975	3.72647	134844779	134844800	134844811	-	9.22807	2.8423	-1.75945	1.08285	7.57381e-18	3.81915e-05	0.00397065	1.59056e-17	9.0607e-05	0.00697645	L	Lost
chr1	134880007	134880975	267.377	237.676	92.0523	66.8737	86.7127	49.9929	134880431	134880417	134880428	+	13.0702	3.24397	-0.174946	3.06902	6.05945e-38	0.560708	3.11998e-33	7.55383e-37	0.60085	1.58777e-31	BS	Book
chr1	134905677	134906201	56.6037	30.1071	26.6638	17.1756	25.5955	12.0761	134905962	134905969	134905980	+	14.7719	3.70037	-0.928845	2.77152	1.22544e-25	0.0203031	7.87159e-13	5.30936e-25	0.0287744	3.85269e-12	BA	Book
chr1	134908952	134909936	124.844	50.0858	46.1858	14.9592	49.9615	7.51689	134909380	134909360	134909371	-	13.7193	2.77802	-1.33565	1.44238	3.09553e-18	0.000861732	2.90003e-05	6.7446e-18	0.00155712	6.60493e-05	L	Lost
chr1	134914832	134916361	255.259	176.284	52.0565	36.5626	49.9615	36.8929	134915812	134915809	134915820	+	8.15789	3.0391	-0.535598	2.5035	9.28926e-34	0.0778862	2.57758e-22	8.17036e-33	0.0994661	3.48744e-21	BS	Book
chr1	134916892	134917507	71.5832	30.8723	28.3019	10.8043	20.4477	3.43335	134917159	0	0	0	0	2.01038	-1.19935	0.811037	5.28675e-13	0.00107088	0.0117437	7.27593e-13	0.00190213	0.0192745	L	Lost
chr1	134917593	134918054	50.4185	31.1605	21.6691	14.8546	16.1293	12.1819	134917683	134917687	134917698	-	10.2982	2.63663	-0.675761	1.96087	3.12265e-16	0.0845729	2.81187e-08	5.65517e-16	0.107347	8.72647e-08	BS	Book
chr1	134930247	134930508	60.8838	14.0894	37.9388	8.10575	20.3636	0	134930368	134930385	134930396	+	0.912281	2.21798	-2.14484	0.0731412	1.42442e-10	1.19209e-05	0.867276	1.67301e-10	3.20863e-05	0.896223	L	Lost
chr1	134946574	134947011	116.988	44.9617	57.0227	23.1542	46.5212	11.6634	134946694	134946721	134946732	+	16.9298	3.19337	-1.379	1.81437	1.60968e-30	6.32071e-05	5.13052e-09	1.07417e-29	0.000142332	1.71218e-08	BA	Book
chr1	134976706	134977127	45.7858	9.06988	27.4923	3.47389	10.3243	0	134977031	0	0	0	0	1.93735	-2.34267	-0.405321	1.23471e-07	2.05804e-05	0.414168	1.29141e-07	5.21901e-05	0.490112	L	Lost
chr1	134979907	134981218	289.09	128.34	43.2623	26.1511	60.9444	9.62234	134981069	134980417	134980428	-	17.5439	3.02301	-1.17626	1.84676	4.26347e-22	0.00240027	1.06348e-08	1.33585e-21	0.00400631	3.44179e-08	L	Lost
chr1	135017479	135018262	79.5346	69.3835	28.7493	23.8352	22.1212	14.4223	135018126	135018026	135018037	-	16.5614	2.37412	-0.206347	2.16777	1.63709e-11	0.629816	2.0315e-09	2.03232e-11	0.666091	7.05143e-09	BS	Book
chr1	135023830	135024452	71.6022	30.7779	29.1494	9.3581	15.9999	0	135024108	135024063	135024074	+	2.89474	2.16726	-1.21467	0.952589	1.60683e-13	0.00149698	0.00455351	2.29732e-13	0.00259129	0.00793398	L	Lost
chr1	135025577	135026915	308.449	115.975	100.742	21.8024	91.1764	17.572	135026080	135026096	135026107	-	13.7544	3.52223	-1.41135	2.11088	2.5821e-30	0.000195702	4.12238e-11	1.68822e-29	0.000399661	1.69434e-10	BA	Book
chr1	135098844	135099649	140.818	123.986	48.3377	40.136	40.2724	35.5326	135099369	135099314	135099325	-	16.3333	3.34269	-0.185387	3.15731	1.29243e-36	0.543468	2.33913e-31	1.43649e-35	0.584702	9.37116e-30	BS	Book
chr1	135100563	135101381	224.796	104.877	63.2602	28.6507	58.6441	21.2697	135100823	135100802	135100813	-	14.807	2.99816	-1.09899	1.89917	2.236e-30	0.000661337	5.74651e-12	1.471e-29	0.00121996	2.58444e-11	BA	Book
chr1	135105621	135105898	40.0242	5.8842	24.2021	3.08621	15.5421	0	135105771	0	0	0	0	2.2856	-2.70801	-0.422412	1.62017e-11	1.88196e-06	0.429521	2.0116e-11	6.27808e-06	0.505285	L	Lost
chr1	135151931	135152935	233.962	44.7679	81.9821	11.2863	88.466	5.79392	135152461	135152446	135152457	-	13.5614	3.37214	-2.38289	0.989242	5.63566e-35	2.03732e-11	0.00154159	5.49367e-34	2.92686e-10	0.00286133	L	Lost
chr1	135222526	135222936	62.0791	17.8515	28.3303	9.6514	20.1283	0	135222726	135222697	135222708	-	4.75439	2.10977	-1.81638	0.293392	1.76009e-11	3.19609e-05	0.451384	2.18047e-11	7.71687e-05	0.527396	L	Lost
chr1	135230519	135231493	123.697	22.9655	39.5483	5.69545	37.0947	0	135231398	135230584	135230595	+	4.84211	2.73806	-2.44586	0.292203	1.14927e-25	4.40782e-11	0.385892	4.98954e-25	5.74608e-10	0.461752	L	Lost
chr1	135236775	135237248	156.736	9.45248	126.282	6.17242	96.6947	0	135237088	135237001	135237012	+	6.59649	5.64373	-3.98303	1.6607	3.48895e-52	4.58334e-16	0.000930005	1.38468e-50	2.34226e-14	0.00177341	L	Lost
chr1	135264051	135264548	68.7119	22.3839	31.2348	8.20013	17.1521	0	135264161	135264149	135264160	-	3.54386	2.23259	-1.61391	0.618683	4.27709e-14	5.60832e-05	0.0833364	6.42585e-14	0.000127843	0.117886	L	Lost
chr1	135276393	135277124	70.7831	63.2953	22.0691	16.7879	16.8617	10.1916	135276625	135277052	135277063	+	15.5439	2.17028	-0.162376	2.0079	3.02858e-08	0.734702	5.2563e-07	3.21837e-08	0.76411	1.43378e-06	BS	Book
chr1	135293100	135293900	111.993	91.9562	49.9093	25.0926	54.7405	15.4614	135293439	135293456	135293467	+	10.0877	2.44652	-0.288456	2.15806	7.12249e-16	0.433895	4.53692e-12	1.24877e-15	0.478124	2.05597e-11	BS	Book
chr1	135294061	135294759	211.954	36.7616	102.903	8.68219	103.245	0	135294336	135294697	135294708	+	-0.0175439	3.16656	-2.52919	0.637372	3.22124e-16	4.12936e-07	0.131862	5.82813e-16	1.66317e-06	0.178736	L	Lost
chr1	135329211	135329641	57.8418	35.7974	28.3114	18.8157	21.6297	8.32162	135329533	135329578	135329589	-	4.24561	2.24952	-0.697571	1.55195	9.56458e-12	0.0896763	1.38162e-05	1.20442e-11	0.113257	3.26297e-05	L	Lost
chr1	135331014	135332130	172.882	83.9448	33.3298	14.3776	17.9479	3.00014	135331373	135331397	135331408	+	6.66667	1.94362	-1.04475	0.898873	1.90383e-12	0.0028162	0.00210752	2.51607e-12	0.00463871	0.00383888	L	Lost
chr1	135339260	135339631	40.81	20.6495	20.8311	9.74578	16.0704	2.77012	135339395	135339388	135339399	+	13.7193	2.62787	-0.998601	1.62927	9.90684e-16	0.0150856	1.75378e-05	1.71716e-15	0.0218929	4.098e-05	L	Lost
chr1	135389084	135390732	302.04	177.546	83.3388	27.3091	68.1074	10.1471	135390129	135390456	135390467	-	7.84211	2.31302	-0.76868	1.54434	3.18628e-13	0.0516298	1.8139e-06	4.45525e-13	0.0682145	4.69713e-06	BS	Book
chr1	135424465	135425144	78.3061	31.4538	31.2728	10.1284	26.2368	4.68251	135424861	135424871	135424882	+	11.0526	2.48655	-1.3148	1.17175	1.03005e-15	0.000961362	0.000827179	1.78166e-15	0.00172311	0.00158616	L	Lost
chr1	135427059	135427590	49.5425	7.91191	24.1546	4.1498	11.0576	0	135427489	135427206	135427217	-	5.98246	2.40646	-2.65097	-0.244505	1.40354e-11	1.53781e-06	0.630992	1.74878e-11	5.2582e-06	0.696149	L	Lost
chr1	135444271	135444650	46.2095	5.78982	24.9736	3.66774	22.3	0	135444391	135444648	135444659	-	7.85965	2.96531	-3.02883	-0.0635205	8.49518e-17	2.54563e-07	0.910071	1.62011e-16	1.08984e-06	0.930977	L	Lost
chr1	135560569	135561086	65.7979	49.1115	24.5831	16.5941	10.3778	4.68295	135560774	135560978	135560989	-	0.105263	1.65134	-0.423173	1.22817	1.71143e-06	0.32694	0.000668474	1.75096e-06	0.370036	0.00129701	L	Lost
chr1	135564139	135564501	79.2247	19.8742	50.8612	8.20013	37.9813	0	135564379	135564282	135564293	+	1.40351	2.52045	-1.98139	0.539063	1.6949e-14	8.47169e-06	0.17264	2.63592e-14	2.37441e-05	0.227511	L	Lost
chr1	135564623	135566514	240.013	188.554	36.2533	27.4035	30.5434	13.2256	135565172	135566240	135566251	+	13.7193	3.23904	-0.353	2.88604	9.92139e-35	0.263249	6.58746e-27	9.48612e-34	0.304034	1.53209e-25	BS	Book
chr1	135567489	135568830	291.56	113.674	89.9478	36.9554	102.96	29.6172	135567996	135567979	135567990	+	16.5614	3.10576	-1.36579	1.73998	1.10898e-27	0.000112738	5.21493e-09	5.78406e-27	0.000241449	1.73846e-08	BA	Book
chr1	135588752	135589503	132.777	97.3634	41.1863	22.0013	26.1996	13.5973	135588880	135589271	135589282	-	13.7193	3.03236	-0.452786	2.57958	2.73695e-20	0.252591	2.06109e-14	7.24494e-20	0.292651	1.18802e-13	BS	Book
chr1	135590358	135592353	392.307	183.703	89.6047	22.0957	66.506	8.55424	135591213	135591436	135591447	+	7.03509	2.43646	-1.09386	1.3426	2.2756e-19	0.00121974	1.4445e-06	5.51636e-19	0.00214486	3.77861e-06	L	Lost
chr1	135592474	135593034	110.112	23.7357	42.5477	7.71807	35.8581	0	135592681	135592553	135592564	+	6.59649	2.94554	-2.21628	0.729263	4.19933e-19	4.41477e-07	0.0606725	9.94805e-19	1.76471e-06	0.0881411	L	Lost
chr1	135637761	135638970	226.5	42.2581	83.734	13.6023	66.3494	3.37988	135638643	135638613	135638624	+	6.63158	2.43961	-2.4157	0.0239067	1.91636e-20	9.32379e-12	0.937704	5.15193e-20	1.46542e-10	0.952354	L	Lost
chr1	135728065	135728736	79.5441	43.4262	30.0016	14.9592	15.0019	5.18444	135728355	135728364	135728375	+	16.1228	2.22093	-0.894793	1.32614	5.18581e-14	0.0162546	3.93264e-05	7.72714e-14	0.0234609	8.8299e-05	L	Lost
chr1	135755871	135756591	92.4618	23.5419	34.5678	6.94779	24.2599	0	135756107	135756085	135756096	-	17.9123	2.37106	-1.97053	0.400529	3.40477e-18	1.90471e-07	0.238046	7.38898e-18	8.43105e-07	0.30268	L	Lost
chr1	135787831	135789150	201.946	162.875	32.8539	33.581	29.8574	23.8997	135788296	135788184	135788195	-	17.8772	2.2552	-0.312349	1.94285	6.33579e-16	0.363068	8.55137e-12	1.11696e-15	0.407165	3.78076e-11	BS	Book
chr1	135804270	135804907	82.4391	36.7565	31.2159	10.6104	27.5464	3.66863	135804442	135804481	135804492	+	14.5789	2.08716	-1.14896	0.938202	8.9151e-15	0.0010349	0.00220612	1.41906e-14	0.00184354	0.00400752	L	Lost
chr1	135814048	135814677	76.5874	22.9705	30.7589	5.98367	31.6302	0	135814259	135814587	135814598	+	9.52632	2.20942	-1.78031	0.429112	1.40577e-10	0.000109614	0.284407	1.6519e-10	0.000235413	0.354054	L	Lost
chr1	135907923	135908512	89.162	40.6282	27.4923	16.2115	20.2986	7.38259	135908146	135908009	135908020	+	12.5088	3.10038	-1.16003	1.94035	2.61519e-26	0.00119942	2.31196e-09	1.20474e-25	0.00211109	7.9861e-09	L	Lost
chr1	135956890	135957968	208.65	122.918	59.9842	30.6835	41.4696	16.5051	135957380	135957348	135957359	+	13.2456	2.48892	-0.762494	1.72643	3.67263e-11	0.102396	6.7582e-06	4.46472e-11	0.128029	1.65221e-05	BS	Book
chr1	135979044	135980345	167.283	74.0996	25.7784	11.3858	20.0416	2.33217	135979365	135979348	135979359	-	16.1228	2.14414	-1.17409	0.970052	1.0661e-13	0.00131991	0.00157366	1.5473e-13	0.00230869	0.00291671	L	Lost
chr1	136007505	136007879	80.8438	17.0762	47.0618	9.64632	36.927	4.45458	136007739	136007746	136007757	-	12.9123	2.89163	-2.22831	0.663314	6.52873e-16	3.92992e-06	0.124343	1.14948e-15	1.20009e-05	0.169478	L	Lost
chr1	136011808	136012755	101.237	51.6213	20.0121	10.8043	11.389	4.45651	136012022	136011996	136012007	+	16.5263	1.83863	-0.975755	0.862878	5.26773e-12	0.00439412	0.00319539	6.74451e-12	0.00699576	0.00568555	L	Lost
chr1	136050816	136051243	106.26	30.1964	47.5187	13.3141	25.7363	4.30978	136050986	136051098	136051109	-	10.7719	2.76414	-1.80004	0.964106	6.08257e-20	5.31248e-06	0.00583036	1.55363e-19	1.56859e-05	0.0100016	L	Lost
chr1	136085641	136086149	187.132	27.4979	97.5182	12.2556	70.5758	0	136085892	136085837	136085848	+	8.2807	2.96606	-2.76503	0.201033	6.09676e-21	9.04004e-11	0.589028	1.71472e-20	1.07558e-09	0.65887	L	Lost
chr1	136106807	136107280	73.8442	12.9315	31.7108	5.30776	31.1407	0	136107074	136107233	136107244	+	0.842105	2.26237	-2.55214	-0.289771	6.63026e-13	5.66002e-08	0.49629	9.0457e-13	2.938e-07	0.570887	L	Lost
chr1	136113000	136114301	230.38	82.2053	58.7699	16.6885	51.2367	8.81528	136113347	136114001	136114012	+	17.8772	2.71206	-1.48688	1.22518	2.00694e-22	2.30564e-05	3.74491e-05	6.47782e-22	5.76972e-05	8.43014e-05	L	Lost
chr1	136131531	136131979	34.5346	55.1895	14.9747	22.4834	12.5052	11.0535	136131845	136131804	136131815	+	15.1754	2.25351	0.675531	2.92904	3.03327e-10	0.0969264	1.07299e-16	3.49762e-10	0.121774	7.92553e-16	BS	Book
chr1	136159446	136159956	36.2912	56.651	19.6026	26.1511	15.636	21.4337	136159717	136159864	136159875	+	7.80702	2.68561	0.625232	3.31084	1.49387e-11	0.163444	5.03041e-17	1.85867e-11	0.196657	3.86455e-16	BS	Book
chr1	136186996	136187785	148.637	35.5041	49.5805	10.8043	38.2955	5.19126	136187613	136187634	136187645	-	14.7719	2.73873	-2.06011	0.678614	4.14679e-14	1.08596e-05	0.0888619	6.23867e-14	2.95508e-05	0.124994	L	Lost
chr1	136201079	136201509	93.7187	30.8825	60.4032	17.4689	50.4209	6.52725	136201252	136201260	136201271	+	10.8246	2.95732	-1.63242	1.32489	1.81969e-20	6.35312e-05	0.000264001	4.90177e-20	0.000142977	0.000538298	L	Lost
chr1	136223237	136223854	111.731	65.6112	41.286	23.4424	36.9107	12.5492	136223485	136223669	136223680	-	7.49123	2.35218	-0.76891	1.58327	1.67391e-08	0.137707	0.000226155	1.7925e-08	0.168147	0.000464311	BS	Book
chr1	136240676	136241189	62.3653	31.9308	22.8597	12.3499	26.5836	4.26944	136240955	136240987	136240998	+	7.89474	2.58949	-0.954384	1.63511	4.0852e-08	0.10353	0.000979006	4.32561e-08	0.129323	0.00186058	L	Lost
chr1	136278214	136278670	112.351	18.6167	44.0908	7.81245	42.291	0	136278436	136278305	136278316	+	6.50877	2.64475	-2.56094	0.083813	4.08904e-12	6.77506e-07	0.851466	5.2784e-12	2.5733e-06	0.883383	L	Lost
chr1	136280886	136281371	89.5335	11.674	52.0422	5.59598	43.6484	0	136281260	136281313	136281324	-	12.4561	4.84249	-2.93577	1.90672	1.58626e-09	0.00320689	0.026301	1.76927e-09	0.00523246	0.0408099	L	Lost
chr1	136354661	136355355	66.2074	18.7162	22.0596	5.8842	13.711	0	136355086	136355149	136355160	-	16.9298	2.24164	-1.80493	0.436709	1.28388e-13	1.64172e-05	0.244938	1.85072e-13	4.26559e-05	0.310512	L	Lost
chr1	136389020	136389282	44.1383	2.79799	28.3351	1.83387	18.9362	0	136389134	136389163	136389174	+	-0.175439	2.12598	-3.97255	-1.84657	1.23628e-10	7.72527e-08	0.00953308	1.45708e-10	3.85389e-07	0.0158603	L	Lost
chr1	136392542	136392968	62.9314	21.8075	24.5926	9.93962	13.097	0	136392831	136392753	136392764	-	13.0175	2.09186	-1.54313	0.548726	1.82791e-11	0.000242055	0.139872	2.26241e-11	0.000485526	0.188434	L	Lost
chr1	136397550	136397963	320.752	32.7062	241.251	16.112	146.541	5.27483	136397677	136397702	136397713	-	13.5614	4.94026	-3.28567	1.65459	1.14209e-54	3.05877e-16	6.28775e-06	5.56819e-53	1.65276e-14	1.54152e-05	L	Lost
chr1	136398096	136398330	60.77	14.3776	51.5948	13.0258	49.9589	3.66125	136398215	136398156	136398167	-	17.8772	3.57216	-2.0985	1.47366	3.04198e-24	4.91816e-06	0.000792071	1.16007e-23	1.46612e-05	0.00152297	L	Lost
chr1	136420540	136421296	214.516	86.4546	70.8306	22.9705	48.6885	11.6858	136421075	136421142	136421153	+	17.5439	3.0047	-1.31484	1.68986	4.58003e-31	4.54302e-05	1.14041e-09	3.20046e-30	0.000105798	4.06402e-09	BA	Book
chr1	136429432	136430081	75.8301	53.6439	20.3932	14.4669	14.9437	8.29433	136429977	136430051	136430062	+	9.2807	2.1432	-0.496015	1.64719	1.1663e-13	0.164322	8.00154e-08	1.68703e-13	0.197609	2.36905e-07	L	Lost
chr1	136431487	136432818	505.252	71.5898	174.115	16.6936	141.818	3.81729	136431836	136432202	136432213	+	6.45614	4.00717	-2.81703	1.19014	1.41733e-47	1.24517e-15	8.31125e-05	3.93248e-46	5.67147e-14	0.000179906	L	Lost
chr1	136435728	136436237	121.173	39.9422	59.5035	16.6885	57.8125	8.71302	136436086	136436073	136436084	-	11.1754	2.97455	-1.59329	1.38125	6.55477e-25	1.43694e-05	2.1751e-05	2.652e-24	3.79188e-05	5.02675e-05	L	Lost
chr1	136440036	136440351	39.1388	21.4249	21.6549	13.1253	13.4224	7.09386	136440164	136440154	136440165	-	17.3158	2.82253	-0.89665	1.92588	2.47769e-10	0.100599	6.74262e-05	2.87275e-10	0.126006	0.000147468	L	Lost
chr1	136449800	136450227	91.6143	44.092	51.1948	27.1102	52.7433	18.9405	136450060	136450059	136450070	+	13.7193	3.40964	-1.05096	2.35868	5.68665e-28	0.00457899	2.97766e-12	3.04169e-27	0.00726452	1.37696e-11	BA	Book
chr1	136451607	136452896	186.204	106.046	52.9087	24.5111	28.8893	11.5682	136452236	136452209	136452220	+	12.5614	2.0173	-0.816473	1.20083	5.35186e-12	0.0258635	7.70802e-05	6.85042e-12	0.0359727	0.000167514	BA	Book
chr1	136453687	136454150	54.9989	34.9277	23.3546	11.8679	11.4164	5.19313	136453800	136453936	136453947	-	8.14035	1.84365	-0.655568	1.18808	7.94711e-09	0.104919	0.000620095	8.60381e-09	0.130934	0.00120721	L	Lost
chr1	136466719	136468048	476.074	93.0198	109.512	28.4671	112.452	19.2943	136467414	136467544	136467555	-	5.70175	4.21013	-2.35979	1.85034	1.42569e-37	7.44905e-09	8.26932e-08	1.71067e-36	5.03523e-08	2.44577e-07	BA	Book
chr1	136478292	136478524	39.5388	4.92008	28.7066	3.47389	23.6167	0	136478420	136478368	136478379	-	1.61404	2.43317	-2.97365	-0.540485	1.2841e-11	1.48364e-06	0.354863	1.60379e-11	5.09199e-06	0.429841	L	Lost
chr1	136484234	136484637	66.5505	11.674	36.6011	4.92008	32.8515	0	136484452	136484431	136484442	-	13.8596	2.87623	-2.50125	0.374977	2.11611e-15	1.11073e-06	0.423204	3.55545e-15	3.96156e-06	0.499074	L	Lost
chr1	136486140	136487039	126.154	56.3475	46.6048	13.8956	42.291	8.71888	136486430	136486456	136486467	-	17.8772	2.6693	-1.16352	1.50578	4.53187e-24	0.000442342	2.00765e-07	1.69998e-23	0.000842738	5.71195e-07	L	Lost
chr1	136507675	136508313	81.6533	25.7634	27.4971	10.6155	24.1274	5.02098	136507847	136507782	136507793	-	9.92982	3.07333	-1.67724	1.3961	4.42907e-26	8.26818e-06	5.79046e-05	1.9967e-25	2.3239e-05	0.000127681	L	Lost
chr1	136535272	136535754	53.7277	18.3336	24.1641	7.91191	11.9116	0	136535410	136535374	136535385	+	16.5614	2.02735	-1.56601	0.461338	4.74963e-11	0.000228507	0.224364	5.73153e-11	0.000460282	0.286959	L	Lost
chr1	136604053	136604587	58.713	53.7434	20.4264	17.6577	11.5007	8.71302	136604420	136604363	136604374	-	14.3158	1.84753	-0.129838	1.71769	7.68905e-09	0.740442	2.19011e-07	8.32868e-09	0.769373	6.20393e-07	L	Lost
chr1	136606521	136608065	147.809	143.856	18.7314	21.6136	14.2856	10.3312	136607682	136607948	136607959	-	16.5614	2.01677	-0.0379999	1.97877	2.66241e-14	0.906644	2.09917e-13	4.07229e-14	0.91861	1.08866e-12	BS	Book
chr1	136640147	136640733	88.2481	62.9127	32.9108	19.6854	23.8182	6.55302	136640360	136640331	136640342	-	14.7719	2.53701	-0.495826	2.04119	3.37515e-20	0.137453	2.68872e-12	8.85899e-20	0.167885	1.24879e-11	L	Lost
chr1	136852440	136852866	89.5667	38.4909	61.6886	17.1705	50.2441	9.94655	136852655	136852649	136852660	+	8.35088	3.19821	-1.19861	1.9996	3.0888e-24	0.0018501	7.85675e-09	1.17727e-23	0.00314953	2.57289e-08	L	Lost
chr1	136886080	136886581	81.2011	47.0838	45.7953	21.9962	41.679	13.8526	136886207	136886188	136886199	+	12.4561	2.67908	-0.784167	1.89491	6.36362e-22	0.021294	4.26506e-10	1.95985e-21	0.0300645	1.58188e-09	BA	Book
chr1	136887622	136888217	76.9684	51.8202	33.3013	25.6691	29.4543	14.1183	136887938	136887943	136887954	+	17.8772	2.38329	-0.586239	1.79705	3.48332e-15	0.114932	2.39367e-08	5.74425e-15	0.14233	7.47922e-08	BS	Book
chr1	136897355	136897950	87.0243	82.4043	31.2206	28.0794	21.8843	15.457	136897635	136897685	136897696	+	17.8772	2.3497	-0.0854543	2.26424	1.50204e-18	0.789059	2.23087e-16	3.38055e-18	0.813166	1.59302e-15	BS	Book
chr1	137002043	137002981	118.316	162.88	27.9113	42.457	14.4385	22.8446	137002488	137002381	137002392	+	16.9298	1.93308	0.458116	2.3912	1.06231e-10	0.206904	1.39986e-15	1.25644e-10	0.243899	9.13839e-15	BS	Book
chr1	137004938	137006148	160.835	327.47	40.8622	68.1159	26.1674	58.5015	137005389	137005621	137005632	-	12.8596	1.7412	1.02581	2.76701	1.94801e-08	0.0066386	2.13152e-19	2.08149e-08	0.0102502	2.09043e-18	BM	Book
chr1	137028629	137029261	74.9446	49.4992	22.0312	13.2197	19.5606	5.1702	137029103	137028964	137028975	+	15.1754	2.15626	-0.603114	1.55315	1.1725e-11	0.126508	4.10053e-06	1.46803e-11	0.155418	1.02598e-05	L	Lost
chr1	137051172	137051563	64.5457	12.0566	28.7351	5.2083	13.8093	0	137051418	137051460	137051471	-	7.98246	1.8912	-2.35769	-0.466492	5.72044e-09	9.80242e-07	0.279469	6.23031e-09	3.55255e-06	0.348674	L	Lost
chr1	137062573	137063226	69.1878	100.246	24.1594	34.1523	15.8922	26.605	137062885	137062887	137062898	-	17.8772	2.08481	0.536669	2.62148	9.37242e-14	0.102018	5.28935e-21	1.36718e-13	0.127591	6.23639e-20	BS	Book
chr1	137066602	137067303	122.854	26.5337	32.8871	8.78166	26.1471	0	137066871	137066816	137066827	-	8.64912	2.37303	-2.21347	0.159556	5.16751e-19	2.4413e-09	0.628475	1.21382e-18	1.90002e-08	0.69389	L	Lost
chr1	137077968	137078444	83.2818	29.8189	34.9678	13.1253	21.736	3.73045	137078233	137078272	137078283	+	15.1754	2.32698	-1.50521	0.821764	2.691e-14	0.000175085	0.0194224	4.11489e-14	0.000360989	0.0308274	L	Lost
chr1	137079561	137079832	38.7293	11.192	22.9214	5.8842	11.2804	0	137079714	137079644	137079655	+	6.52632	2.13239	-1.78621	0.346182	7.84205e-09	0.000592409	0.460076	8.49142e-09	0.00110065	0.535639	L	Lost
chr1	137082273	137083452	463.871	110.851	214.482	30.8723	173.737	25.0605	137082738	137082767	137082778	+	12.193	3.52133	-2.05985	1.46148	6.52677e-40	7.00125e-10	2.30963e-07	9.65024e-39	6.41223e-09	6.52562e-07	BA	Book
chr1	137087120	137087718	83.7625	38.2128	30.4301	14.1838	15.8185	4.85201	137087395	137087327	137087338	+	13.7193	2.16145	-1.14529	1.01616	4.36434e-11	0.00626087	0.00462204	5.28213e-11	0.00971156	0.00804141	L	Lost
chr1	137095254	137096169	336.984	78.0606	153.369	20.8485	126.077	10.0552	137095842	137095680	137095691	-	3.84211	3.31137	-2.1129	1.19846	4.59464e-23	5.51021e-07	0.00069698	1.57199e-22	2.14302e-06	0.00134907	BA	Book
chr1	137114124	137115197	348.455	129.776	84.1198	33.0938	77.3067	16.2745	137114473	137115176	137115187	+	6.66667	3.32707	-1.42636	1.90071	2.12378e-30	7.21506e-05	3.01053e-10	1.40043e-29	0.000160522	1.13343e-09	BA	Book
chr1	137131476	137132274	106.099	64.0758	39.1388	22.8711	32.4275	13.3595	137131969	137131957	137131968	-	17.8772	2.17821	-0.738485	1.43972	1.60356e-11	0.0669813	2.2095e-05	1.9915e-11	0.0865825	5.10276e-05	BS	Book
chr1	137136281	137136726	56.6132	36.18	23.3214	13.7017	16.0424	5.90786	137136501	137136550	137136561	+	17.8772	2.3489	-0.639951	1.70895	7.2944e-14	0.0984903	5.24822e-07	1.07347e-13	0.123601	1.43192e-06	L	Lost
chr1	137142167	137142474	34.1204	24.9932	21.6454	12.6432	19.5048	4.67889	137142315	137142277	137142288	-	16.3509	2.70277	-0.470517	2.23226	3.08001e-13	0.283194	2.47406e-08	4.31074e-13	0.324749	7.71832e-08	L	Lost
chr1	137157443	137157882	63.3931	11.8679	32.563	5.5016	27.4066	0	137157675	137157581	137157592	+	4.17544	1.99936	-2.42085	-0.421491	2.8157e-10	4.09279e-07	0.329391	3.25426e-10	1.65079e-06	0.402492	L	Lost
chr1	137209540	137210454	153.894	100.445	54.0708	30.3009	68.4909	18.4802	137210081	137210081	137210092	+	12.9123	2.63526	-0.616963	2.0183	2.80959e-12	0.184441	1.64269e-07	3.67065e-12	0.219602	4.72024e-07	BS	Book
chr1	137240637	137241075	54.1372	15.2474	25.8211	8.78166	18.234	0	137240906	137240895	137240906	+	14.5789	2.5973	-1.86614	0.731162	4.20887e-17	1.5081e-05	0.066803	8.2703e-17	3.95626e-05	0.0962763	L	Lost
chr1	137264928	137265527	128.225	61.1732	52.4612	24.029	50.6346	12.3215	137265070	137265254	137265265	+	7.47368	2.92707	-1.06995	1.85712	1.10584e-19	0.00715771	5.51338e-08	2.75592e-19	0.0109926	1.65812e-07	BA	Book
chr1	137369094	137369688	255.183	68.6974	143.209	30.4948	159.248	23.4388	137369273	137369271	137369282	-	14.7719	4.41033	-1.89343	2.5169	5.72468e-40	2.53361e-06	1.12005e-12	8.4939e-39	8.15987e-06	5.40098e-12	BA	Book
chr1	137404467	137404678	36.7007	4.92008	27.1208	3.47389	17.3782	0	137404561	137404502	137404513	-	0.631579	2.34607	-2.86766	-0.521588	4.25585e-09	1.14287e-05	0.391583	4.65551e-09	3.09036e-05	0.467757	L	Lost
chr1	137406994	137407935	168.592	117.819	40.4005	26.1511	38.5803	16.2071	137407503	137407500	137407511	+	11.5439	2.79138	-0.521172	2.27021	3.23442e-19	0.170441	1.21143e-12	7.7373e-19	0.204381	5.82259e-12	BS	Book
chr1	137450288	137450512	127.534	1.92825	119.616	1.92825	84.7547	0	137450397	137450436	137450447	-	8.35088	3.87425	-5.84239	-1.96814	8.68288e-36	2.77641e-13	0.0122783	9.07131e-35	6.77784e-12	0.0200965	L	Lost
chr1	137461445	137461856	54.5183	12.6432	24.9594	6.17751	14.7703	0	137461612	137461781	137461792	-	-0.122807	1.61674	-2.1571	-0.540359	3.28789e-05	9.42246e-05	0.262798	3.32087e-05	0.000205239	0.330456	L	Lost
chr1	137482425	137483066	99.5609	45.9258	34.9916	14.1838	25.7991	3.82667	137482989	137482927	137482938	-	13.0702	2.83787	-1.11358	1.72429	3.16217e-25	0.00104637	1.30583e-08	1.31934e-24	0.00186152	4.19452e-08	L	Lost
chr1	137485275	137486212	281.48	207.365	115.393	68.121	101.429	51.541	137485711	137485696	137485707	-	16.5614	3.50709	-0.444214	3.06288	7.81592e-40	0.161343	1.05762e-29	1.14813e-38	0.194315	3.38889e-28	BS	Book
chr1	137487379	137487891	56.2749	44.3853	21.6644	16.4997	13.1214	5.48853	137487593	137487723	137487734	-	16.3509	2.071	-0.347657	1.72335	3.92648e-11	0.366092	1.99468e-07	4.76511e-11	0.410203	5.67737e-07	L	Lost
chr1	137494672	137495240	85.867	59.3495	33.3393	17.951	29.4348	7.78716	137495075	137495038	137495049	+	16.5263	2.63328	-0.55189	2.08139	5.71065e-20	0.113048	9.07054e-12	1.4637e-19	0.140172	3.99676e-11	L	Lost
chr1	137512192	137512833	127.03	24.3122	57.0654	7.71807	46.3774	0	137512659	137512673	137512684	-	9.24561	2.92569	-2.37507	0.550615	1.74013e-17	2.04929e-07	0.168712	3.53835e-17	8.98661e-07	0.222845	L	Lost
chr1	137528863	137529319	186.266	16.6885	113.359	7.23601	89.9402	0	137529021	137529039	137529050	+	12.5439	3.98736	-3.44821	0.539153	2.81105e-32	1.31142e-13	0.202073	2.16987e-31	3.50121e-12	0.261579	L	Lost
chr1	137541912	137542556	47.914	82.5037	16.6744	29.625	7.825	14.9485	137542204	137542160	137542171	+	14.5789	1.58085	0.776388	2.35724	5.55599e-07	0.0378671	2.97809e-14	5.72644e-07	0.051235	1.6823e-13	BM	Book
chr1	137551628	137552198	97.0897	10.4217	46.2997	4.8257	46.6512	0	137552081	137551863	137551874	+	10.6316	2.86883	-3.24819	-0.379361	8.94651e-22	8.79897e-12	0.391771	2.71905e-21	1.39913e-10	0.467916	L	Lost
chr1	137572076	137572959	243.322	74.4873	77.5535	19.3921	69.119	8.38617	137572209	137572627	137572638	+	9.49123	3.01698	-1.70862	1.30836	3.50249e-24	5.11615e-06	3.83187e-05	1.32764e-23	1.51767e-05	8.61333e-05	L	Lost
chr1	137573639	137573836	33.763	4.92008	24.5784	3.28005	10.5433	0	137573738	0	0	0	0	2.04068	-2.74527	-0.704587	1.64269e-08	9.91667e-06	0.226228	1.75945e-08	2.72648e-05	0.2891	L	Lost
chr1	137620470	137621144	91.9763	16.6936	38.3198	6.27189	25.0361	0	137620910	137620732	137620743	+	6.78947	2.28505	-2.48179	-0.196739	1.73061e-15	4.03785e-09	0.605312	2.93023e-15	2.95358e-08	0.673268	L	Lost
chr1	137631744	137632332	58.7224	13.6023	21.6691	5.59598	12.0768	0	137631995	137631981	137631992	+	8.78947	1.89654	-2.08271	-0.18617	2.55529e-08	1.89751e-05	0.666615	2.72087e-08	4.85035e-05	0.727526	L	Lost
chr1	137650047	137650448	29.2063	49.5986	16.2696	20.2618	8.78314	10.0618	137650202	137650297	137650308	+	0.894737	1.36449	0.755642	2.12013	0.000244293	0.0871751	6.0701e-09	0.000245654	0.11034	2.01051e-08	BM	Book
chr1	137651288	137652203	110.727	107.099	33.2871	26.2404	30.5227	24.0253	137651589	137651619	137651630	+	17.9123	2.4726	-0.048694	2.4239	6.00348e-19	0.88385	1.42289e-17	1.40233e-18	0.89852	1.15151e-16	BS	Book
chr1	137652327	137652768	84.1578	48.5351	47.895	27.6917	40.7324	12.6513	137652474	137652378	137652389	-	15.5614	2.96563	-0.800362	2.16527	2.33344e-20	0.039025	2.58212e-10	6.21659e-20	0.0526892	9.79969e-10	BS	Book
chr1	137667125	137667712	59.9415	20.3613	24.1594	5.59598	15.5577	0	137667461	137667412	137667423	+	5.15789	1.84761	-1.58473	0.262885	3.78357e-10	0.000109316	0.469186	4.34227e-10	0.000234834	0.544619	L	Lost
chr1	137688636	137689551	177.538	87.6176	56.6844	27.5029	57.6554	19.9175	137688810	137688716	137688727	-	13.7193	2.95665	-1.0256	1.93105	6.58662e-24	0.00450755	3.60516e-10	2.43362e-23	0.00715947	1.34655e-09	BA	Book
chr1	137696379	137697466	84.1198	169.838	23.7546	43.5155	12.8382	37.9335	137696888	137696889	137696900	+	16.7193	1.57453	1.00814	2.58267	1.14752e-07	0.00462541	8.08543e-19	1.20104e-07	0.00733157	7.42726e-18	BM	Book
chr1	137713529	137713966	56.199	44.4796	22.0596	17.7521	11.7856	4.49858	137713816	137713784	137713795	-	11.0351	1.99328	-0.337986	1.65529	3.08128e-12	0.336322	5.75707e-08	4.0134e-12	0.379705	1.72911e-07	L	Lost
chr1	137716505	137717081	101.956	32.423	39.9056	14.5664	43.534	7.05888	137716851	0	0	0	0	2.32138	-1.66777	0.653614	5.93859e-13	7.6607e-05	0.0726198	8.13443e-13	0.000169791	0.103949	L	Lost
chr1	137785907	137786599	53.2755	51.4223	23.7451	12.1561	10.2542	3.26979	137786077	137786029	137786040	-	16.9298	1.61748	-0.0452371	1.57224	4.64128e-06	0.917153	1.46509e-05	4.72525e-06	0.927623	3.45026e-05	L	Lost
chr1	137802920	137803202	32.4634	7.23601	20.4026	4.72624	14.1418	0	137803089	137803060	137803071	-	6.87719	2.17596	-2.15392	0.022037	2.67711e-10	6.3846e-05	0.965095	3.09852e-10	0.0001436	0.973848	L	Lost
chr1	137904715	137904973	45.0522	17.1756	25.4164	10.6155	11.1228	0	137904847	137904730	137904741	-	-0.578947	1.96618	-1.40247	0.563714	1.45846e-07	0.00493645	0.196386	1.52277e-07	0.00779254	0.255148	L	Lost
chr1	137990019	137990914	204.616	68.3098	89.1857	23.9245	86.5575	13.4519	137990515	137990498	137990509	+	16.9298	3.22662	-1.5806	1.64602	1.60197e-34	1.56423e-06	1.01451e-08	1.50456e-33	5.33673e-06	3.2905e-08	BA	Book
chr1	138012586	138012972	45.3953	33.9636	20.0121	14.3776	12.0768	4.30978	138012835	138012851	138012862	-	7	1.8054	-0.422333	1.38306	4.24806e-09	0.271868	3.17326e-05	4.64729e-09	0.312935	7.19533e-05	L	Lost
chr1	138027373	138027893	147.837	84.71	75.4111	34.058	72.7034	23.6218	138027676	138027621	138027632	-	16.7193	2.97646	-0.800227	2.17623	1.6402e-26	0.0184072	1.26706e-13	7.6726e-26	0.0262784	6.7327e-13	BA	Book
chr1	138035245	138035984	95.3188	44.8724	29.9826	12.7376	21.406	3.31292	138035750	138035641	138035652	-	18.1053	2.76302	-1.10567	1.65736	6.24318e-22	0.0019972	1.64824e-07	1.92521e-21	0.00338247	4.73499e-07	L	Lost
chr1	138070517	138071061	67.4407	20.4557	22.8929	8.10575	14.4825	0	138070765	138070759	138070770	+	4.92982	1.97805	-1.726	0.252057	1.68647e-06	0.00153922	0.587905	1.72553e-06	0.00265695	0.657913	L	Lost
chr1	138346801	138347239	77.0681	12.832	30.3874	5.8842	16.6191	0	138346914	0	0	0	0	2.03105	-2.57896	-0.547915	3.12491e-10	7.70878e-08	0.202468	3.60085e-10	3.8468e-07	0.261997	L	Lost
chr1	138357305	138357895	120.74	63.2953	61.2079	24.9881	60.2608	12.4374	138357578	138357551	138357562	+	11.9649	2.8382	-0.933577	1.90462	1.99093e-23	0.00756283	3.96952e-10	7.04391e-23	0.0115625	1.47679e-09	BA	Book
chr1	138367187	138367458	45.819	8.58782	30.4063	6.46573	19.8524	0	138367345	138367395	138367406	+	1.49123	2.66389	-2.43323	0.230662	1.42792e-14	3.3255e-06	0.637878	2.23392e-14	1.03546e-05	0.702148	L	Lost
chr1	138367587	138368044	54.6131	21.5193	25.4211	11.197	16.1338	0	138367785	138367783	138367794	+	7.98246	2.58012	-1.36837	1.21176	6.69887e-16	0.00100599	0.00131801	1.17815e-15	0.00179617	0.0024685	L	Lost
chr1	138462439	138463257	217.24	24.2127	106.975	8.20013	116.993	0	138463074	138463114	138463125	-	6.14035	3.23586	-3.13961	0.0962541	1.51992e-22	2.87889e-12	0.806275	4.95773e-22	5.2606e-11	0.84539	L	Lost
chr1	138465742	138467316	288.35	141.455	78.801	34.058	62.9811	25.9128	138467070	138466040	138466051	-	8.49123	2.76642	-1.0302	1.73622	4.25596e-24	0.00236288	8.61568e-10	1.60108e-23	0.00394857	3.11017e-09	BA	Book
chr1	138467390	138467976	126.272	65.6112	52.0849	21.708	36.9585	11.3563	138467648	138467653	138467664	-	8.50877	2.94273	-0.9467	1.99603	7.10675e-28	0.00395767	5.18462e-12	3.76508e-27	0.00635779	2.33887e-11	BA	Book
chr1	138488193	138488658	60.351	38.3021	25.3831	16.6936	16.3786	7.88392	138488394	138488416	138488427	-	14.3158	2.62474	-0.648929	1.97581	3.20098e-16	0.0967066	1.16273e-08	5.79238e-16	0.121521	3.75118e-08	L	Lost
chr1	138491493	138491881	43.7525	23.2537	20.8454	8.10575	11.8402	0	138491757	138491759	138491770	+	18.4737	2.2673	-0.917914	1.34939	3.54512e-13	0.021218	0.000168417	4.9401e-13	0.0299658	0.000350886	L	Lost
chr1	138494001	138494493	72.8686	30.1964	37.0628	15.5305	36.5571	10.7761	138494338	138494321	138494332	-	17.3158	3.29296	-1.25618	2.03678	2.47681e-23	0.0018373	3.58327e-08	8.67792e-23	0.00312962	1.09998e-07	L	Lost
chr1	138509647	138510336	236.166	17.0813	128.762	5.78982	121.587	0	138509942	138509970	138509981	-	9.05263	3.98293	-3.82735	0.155584	4.02812e-43	1.2672e-19	0.689144	7.76186e-42	1.82203e-17	0.74714	L	Lost
chr1	138534793	138535275	71.5879	26.4394	34.5346	13.3141	28.7104	3.43335	138535028	138534997	138535008	+	11.5439	2.3483	-1.44907	0.89923	9.55837e-12	0.00121487	0.0211448	1.20368e-11	0.00213696	0.033346	L	Lost
chr1	138542440	138543437	340.241	89.7245	151.203	28.2732	131.766	21.6448	138542997	138542968	138542979	-	16.3333	4.03325	-1.91902	2.11423	7.96556e-39	4.65409e-07	9.35969e-11	1.07816e-37	1.851e-06	3.71204e-10	BA	Book
chr1	138555910	138556905	380.237	172.516	85.3578	37.338	70.4722	26.683	138556578	138556157	138556168	+	16.9298	3.34841	-1.14052	2.20788	1.92073e-37	0.000386841	3.4034e-16	2.28128e-36	0.000746708	2.37339e-15	BA	Book
chr1	138569923	138570658	84.0486	60.5968	21.2074	12.7376	19.6113	4.7973	138570161	138570144	138570155	+	14.4035	2.36913	-0.477992	1.89114	3.98274e-14	0.212634	8.24941e-09	6.00144e-14	0.249994	2.69529e-08	L	Lost
chr1	138570922	138572238	363.418	155.639	125.082	50.9505	141.71	39.922	138571806	138571641	138571652	-	5.77193	3.20913	-1.22593	1.9832	3.4132e-33	0.000203301	8.34283e-13	2.85905e-32	0.000413635	4.07393e-12	BA	Book
chr1	138575061	138575734	82.3822	28.4569	20.3647	9.26372	16.8705	0	138575226	138575611	138575622	-	8.22807	2.05738	-1.5099	0.547484	4.00956e-09	0.000948632	0.1616	4.39331e-09	0.00170236	0.214462	L	Lost
chr1	138576551	138577279	170.287	31.2651	77.0586	13.8012	80.2026	6.63112	138576946	138576897	138576908	+	6.15789	3.22109	-2.46347	0.757626	2.73081e-30	5.91779e-11	0.0240654	1.78167e-29	7.45115e-10	0.0375885	L	Lost
chr1	138578171	138579151	131.148	32.8056	51.628	6.65957	48.7575	0	138579041	138579041	138579052	-	7.85965	2.63054	-2.00179	0.628748	6.63138e-16	2.70445e-06	0.0880849	1.16677e-15	8.64286e-06	0.12398	L	Lost
chr1	138586437	138587555	234.871	65.0297	77.4823	16.4003	72.7034	8.06578	138586783	138586718	138586729	+	11.5439	3.08757	-1.85171	1.23585	3.61269e-19	2.05557e-05	0.000728192	8.61426e-19	5.21391e-05	0.0014062	L	Lost
chr1	138588883	138589314	49.5757	34.9328	25.0163	11.7735	14.7862	4.41297	138589203	138589174	138589185	+	14.7719	1.74129	-0.519689	1.2216	2.1894e-06	0.260284	0.00174628	2.237e-06	0.300906	0.00321662	L	Lost
chr1	138591291	138593564	738.613	309.728	177.505	34.6395	136.866	18.0649	138591804	138591839	138591850	+	7.29825	3.4722	-1.25486	2.21734	7.17778e-50	1.33505e-05	2.13599e-20	2.35555e-48	3.55311e-05	2.34869e-19	BA	Book
chr1	138594251	138595858	349.84	206.49	77.4681	43.8981	82.1806	35.0899	138594755	138594741	138594752	-	13.7193	2.86793	-0.76257	2.10536	1.26658e-25	0.023932	5.65534e-14	5.48062e-25	0.0334949	3.10572e-13	BA	Book
chr1	138603779	138604158	64.9836	37.338	34.5583	15.1479	18.2295	6.2827	138604059	138604123	138604134	-	6.08772	2.01557	-0.794666	1.2209	7.12301e-10	0.0544632	0.000567193	8.07002e-10	0.0716373	0.00110989	L	Lost
chr1	138624269	138625151	143.723	22.8711	46.6475	5.5016	38.6429	0	138624621	138625083	138625094	+	1.03509	2.58943	-2.68144	-0.0920015	2.08606e-19	3.77037e-11	0.798301	5.07466e-19	5.0094e-10	0.839102	L	Lost
chr1	138656130	138656850	79.9536	42.5514	27.8924	15.2423	16.4956	8.28134	138656558	138656508	138656519	-	17.8772	2.80242	-0.915103	1.88732	4.08072e-24	0.00695633	7.12716e-10	1.5384e-23	0.0107037	2.59019e-09	L	Lost
chr1	138808646	138809097	54.1657	28.7604	21.2501	10.5211	10.7767	4.21182	138808805	138808796	138808807	-	5.64912	1.82036	-0.952915	0.867448	6.07788e-09	0.019148	0.0139666	6.61049e-09	0.0272591	0.0226445	L	Lost
chr1	138847559	138848340	188.109	50.5577	58.2275	15.6351	50.9042	5.45364	138848021	138847960	138847971	+	6.70175	3.31298	-1.89486	1.41812	6.89698e-32	1.14724e-07	6.20637e-06	5.16634e-31	5.44085e-07	1.52256e-05	L	Lost
chr1	138848529	138850887	606.723	324.955	178.639	57.1229	136.337	50.4924	138849454	138848662	138848673	+	9.64912	3.30155	-0.900356	2.40119	1.77333e-37	0.00456433	5.68135e-20	2.1136e-36	0.00724422	5.95936e-19	BA	Book
chr1	138854097	138854546	78.7203	14.2833	39.572	5.98367	24.1894	0	138854343	138854375	138854386	+	5.22807	2.33705	-2.51431	-0.177267	1.02441e-15	9.2314e-09	0.657328	1.77243e-15	6.04962e-08	0.71901	L	Lost
chr1	138869678	138870056	60.7937	20.3613	29.1351	7.52423	22.3828	0	138869798	138869830	138869841	-	13.7895	2.56248	-1.60691	0.95557	1.06724e-18	4.10825e-05	0.00788557	2.43459e-18	9.66611e-05	0.0132709	L	Lost
chr1	138877147	138877578	57.9177	29.7194	27.8924	14.0894	23.9025	6.66479	138877294	138877313	138877324	-	7.4386	2.76322	-0.970777	1.79244	9.63468e-15	0.027542	4.49935e-06	1.52916e-14	0.0381275	1.12097e-05	L	Lost
chr1	138904831	138905721	150.737	38.7893	54.0708	11.0032	59.3593	3.94807	138905401	138905432	138905443	+	12.9123	3.21223	-1.96762	1.24461	9.23684e-38	1.53911e-09	2.62094e-05	1.12908e-36	1.26702e-08	6.00191e-05	L	Lost
chr1	139070258	139070994	187.604	37.338	97.5371	10.2278	84.1567	0	139070790	139070556	139070567	-	8.73684	3.02597	-2.32318	0.702787	2.15902e-28	1.54489e-10	0.0278731	1.19331e-27	1.7126e-09	0.0430858	L	Lost
chr1	139100741	139101374	82.4533	44.7628	33.763	14.1838	16.7296	7.01193	139101135	139100975	139100986	-	18.4737	2.51601	-0.865208	1.6508	3.77102e-18	0.016198	1.7237e-07	8.14992e-18	0.0233882	4.94048e-07	L	Lost
chr1	139123373	139124306	100.423	58.564	26.2591	13.5079	19.9257	4.1495	139123585	139123611	139123622	-	6.94737	2.35412	-0.773948	1.58017	3.27766e-17	0.025732	1.29385e-07	6.50292e-17	0.0358045	3.76181e-07	L	Lost
chr1	139275171	139275471	67.8787	8.20013	52.885	4.92008	39.0609	0	139275311	139275345	139275356	-	7.26316	3.56384	-3.02316	0.540682	4.62861e-19	1.42803e-07	0.314221	1.09208e-18	6.57226e-07	0.386388	L	Lost
chr1	139284193	139284479	52.9087	2.31593	37.915	1.83387	25.2235	0	139284312	139284403	139284414	-	3.15789	2.76164	-4.55141	-1.78977	7.08694e-18	1.06582e-08	0.0215787	1.49237e-17	6.8601e-08	0.0339798	L	Lost
chr1	139314745	139315658	501.905	95.5245	239.532	25.9522	251.738	23.5756	139315142	139315217	139315228	+	16.1579	6.02403	-2.39614	3.62789	5.38793e-80	3.04326e-11	2.23123e-27	1.70868e-77	4.1506e-10	5.51839e-26	BA	Book
chr1	139592020	139592812	137.719	15.63	56.6132	4.92008	70.6721	0	139592486	139592567	139592578	+	10.1404	2.81698	-3.1323	-0.315315	3.76139e-24	7.77507e-14	0.409727	1.42339e-23	2.2115e-12	0.485551	L	Lost
chr1	139672424	139672859	88.705	37.6262	54.5515	18.6218	61.3306	12.1819	139672557	139672568	139672579	-	11.1404	4.9324	-1.22831	3.70409	3.43306e-39	0.00152283	5.24144e-20	4.80285e-38	0.00263148	5.51668e-19	BA	Book
chr1	139773758	139774272	24.1878	55.5823	10.8369	28.0794	6.24355	14.4439	139773953	139773891	139773902	-	6.01754	1.45798	1.18831	2.64629	2.53579e-05	0.00247572	3.91426e-16	2.56329e-05	0.00412212	2.70968e-15	BM	Book
chr1	140041386	140041859	27.5161	47.2776	11.2654	20.8383	8.10421	13.6896	140041509	140041601	140041612	+	14.0351	2.61688	0.781221	3.3981	1.87635e-12	0.0498179	7.88914e-21	2.48053e-12	0.0659902	9.13972e-20	BM	Book
chr1	140101993	140102724	89.9715	29.0435	40.0053	8.49344	37.9192	0	140102565	140102117	140102128	-	16.5263	2.90112	-1.63865	1.26247	1.22009e-20	4.41716e-05	0.000429944	3.34231e-20	0.000103122	0.000854024	L	Lost
chr1	140468260	140468722	57.9272	21.1316	22.5071	8.2996	14.0133	0	140468388	140468559	140468570	-	14.807	2.16927	-1.46756	0.701717	8.95193e-15	0.000126252	0.0426856	1.42466e-14	0.000267924	0.0638338	L	Lost
chr1	140614885	140616121	131.182	105.354	28.6877	22.2896	31.47	12.4741	140615403	140615673	140615684	+	17.9123	2.50814	-0.311453	2.19668	5.1488e-23	0.310005	6.71716e-17	1.75275e-22	0.352586	5.07082e-16	BS	Book
chr1	140853151	140854006	152.108	31.6477	53.7989	7.23601	46.9503	0	140853829	140853813	140853824	-	8.17544	3.01294	-2.26724	0.745698	1.07172e-22	2.19239e-08	0.0359915	3.54589e-22	1.28888e-07	0.0545807	L	Lost
chr1	141351749	141352311	91.6475	61.4564	43.3145	33.0938	43.0629	28.9756	141351857	141351916	141351927	-	4.94737	2.61562	-0.570302	2.04532	9.80266e-18	0.124276	1.82916e-10	2.03782e-17	0.152908	7.05488e-10	BS	Book
chr1	141383998	141385294	117.774	74.5867	27.0164	15.7294	36.7128	9.71661	141384626	141385062	141385073	-	15.5439	2.8707	-0.663431	2.20727	1.39998e-23	0.0558908	2.53472e-13	5.01696e-23	0.0733502	1.30258e-12	L	Lost
chr1	141391056	141393745	837.854	289.55	128.715	35.6036	123.225	22.3958	141392941	141392049	141392060	-	9.24561	3.8684	-1.53279	2.33561	6.32826e-45	6.24153e-06	8.68174e-17	1.42304e-43	1.80913e-05	6.47609e-16	BA	Book
chr1	141396540	141396898	37.1008	5.11392	21.2691	2.60415	19.9091	0	141396678	0	0	0	0	2.82467	-2.87004	-0.0453626	2.5228e-15	1.8371e-06	0.937636	4.21249e-15	6.14351e-06	0.952354	L	Lost
chr1	142085204	142085551	37.5103	2.79799	26.2449	1.64003	19.1489	0	142085289	142085497	142085508	-	1.63158	3.93767	-3.73736	0.200306	8.94635e-23	3.79986e-07	0.788091	2.98385e-22	1.54679e-06	0.83079	L	Lost
chr1	142101889	142102299	111.108	6.46573	68.2407	3.18567	113.052	0	142102145	142102180	142102191	-	6.87719	4.90021	-4.15038	0.749822	6.55049e-40	2.34289e-13	0.183659	9.68109e-39	5.82002e-12	0.240223	L	Lost
chr1	142121910	142122117	31.6681	6.65449	26.6544	5.2083	18.4369	0	142121990	142121954	142121965	-	13.7193	2.97667	-2.15286	0.823815	2.27433e-13	0.000199136	0.134719	3.21375e-13	0.000406039	0.182201	L	Lost
chr1	142325417	142326503	506.047	31.1605	240.375	8.48835	187.591	2.10725	142326025	142325938	142325949	-	3.61404	5.25992	-4.00227	1.25765	6.14186e-82	1.56623e-28	0.000162506	2.39554e-79	2.58563e-25	0.000339384	L	Lost
chr1	142524232	142524869	37.5055	68.0215	16.6554	22.1901	12.8701	15.4141	142524496	142524375	142524386	-	16.9298	2.34488	0.859331	3.20421	9.88758e-11	0.0362041	1.70305e-19	1.17125e-10	0.0491543	1.68729e-18	BM	Book
chr1	143714492	143715129	51.666	88.6711	16.6696	26.8219	15.5693	17.5346	143714613	143714856	143714867	+	17.5439	2.75998	0.778034	3.53801	4.16676e-19	0.0213754	2.23881e-31	9.87295e-19	0.0301656	9.01181e-30	BM	Book
chr1	145402576	145403362	211.611	29.625	96.228	8.9755	92.6518	0	145402879	145402939	145402950	-	13.7544	3.61981	-2.85867	0.761138	1.04851e-41	3.2577e-15	0.0206878	1.8033e-40	1.34809e-13	0.0326799	L	Lost
chr1	145439142	145439968	84.1103	149.76	27.4829	47.6704	31.144	43.9069	145439494	145439514	145439525	-	17.8772	3.41635	0.827269	4.24362	1.14068e-28	0.0133945	2.48306e-44	6.46942e-28	0.0196055	4.55447e-42	BM	Book
chr1	145483696	145484239	54.5942	17.0762	20.8406	7.91191	19.6297	0	145484027	145484055	145484066	+	17.5439	2.71508	-1.65823	1.05684	9.74275e-18	9.19753e-05	0.00686566	2.02586e-17	0.000200836	0.0116457	L	Lost
chr1	145578904	145579540	56.2891	13.0258	23.3404	5.98367	11.5029	0	145579006	145578901	145578912	-	2.80702	2.03953	-2.11663	-0.0771034	1.4641e-09	1.33894e-05	0.859461	1.6363e-09	3.56096e-05	0.889917	L	Lost
chr1	145581061	145581429	42.8908	9.84016	21.6739	5.30776	14.2734	0	145581315	145581192	145581203	-	6.89474	2.12193	-2.09503	0.0268987	1.25611e-10	2.29679e-05	0.952776	1.47973e-10	5.74969e-05	0.96417	L	Lost
chr1	145592793	145593548	100.785	22.6671	40.81	5.78474	39.3801	0	145593137	145593219	145593230	+	12.5614	2.61948	-2.11219	0.507285	6.24684e-15	2.58869e-06	0.197997	1.0081e-14	8.31601e-06	0.257035	L	Lost
chr1	145684174	145684583	45.8712	10.9981	22.5261	4.72624	14.5032	0	145684471	145684180	145684191	-	9.80702	1.89977	-2.03841	-0.138636	1.30326e-08	3.63739e-05	0.75581	1.40023e-08	8.67558e-05	0.803751	L	Lost
chr1	146189567	146190034	47.9662	43.0284	20.4406	15.7244	19.6297	7.09417	146189746	146189758	146189769	+	13.807	2.52477	-0.14714	2.37763	2.1686e-13	0.71744	2.95586e-11	3.06907e-13	0.748037	1.23402e-10	L	Lost
chr1	146335583	146336529	67.9119	135.283	24.5831	46.0304	23.7839	41.9292	146336095	146336088	146336099	-	17.5439	2.64002	0.989761	3.62979	2.67929e-19	0.00265935	1.35619e-36	6.45621e-19	0.00440108	1.02265e-34	BM	Book
chr1	147611626	147612548	45.8332	86.8372	16.2459	25.664	10.6928	21.1652	147612046	147612004	147612015	-	18.1053	2.51151	0.921376	3.43289	4.7259e-14	0.013358	5.00949e-26	7.06885e-14	0.0195556	1.04995e-24	BM	Book
chr1	148169270	148170159	125.02	20.7439	52.5277	5.11392	56.6443	0	148170044	148170090	148170101	-	13.8421	3.69901	-2.58855	1.11046	2.17418e-32	5.0115e-10	0.00385468	1.69562e-31	4.80382e-09	0.0067878	L	Lost
chr1	148263989	148264488	56.2085	9.26372	26.2449	3.28005	17.5915	0	148264371	148264316	148264327	+	4.38596	2.11547	-2.63021	-0.514746	3.06033e-11	1.91836e-07	0.268111	3.7383e-11	8.48044e-07	0.336308	L	Lost
chr1	148274238	148274950	134.938	23.4424	52.466	7.52423	58.4093	3.08647	148274343	148274288	148274299	+	12.4561	5.00067	-2.50461	2.49606	4.12e-43	4.85028e-09	2.57513e-09	7.9299e-42	3.46129e-08	8.84702e-09	L	Lost
chr1	148342326	148342574	34.9821	7.42985	23.7404	3.95596	14.6484	0	148342464	148342433	148342444	-	11.2105	1.88614	-2.25293	-0.366795	3.63706e-09	1.6886e-05	0.45211	3.99303e-09	4.37065e-05	0.528014	L	Lost
chr1	149386124	149386913	62.8934	118.301	22.0834	29.2424	20.7889	26.5626	149386566	149386592	149386603	+	17.8772	3.00175	0.907881	3.90963	1.83266e-16	0.0277919	1.58243e-27	3.38879e-16	0.0384468	3.99232e-26	BM	Book
chr1	150344639	150345125	53.3846	35.1215	25.8543	15.3418	25.8387	3.93901	150344881	150344856	150344867	+	10.5439	2.95312	-0.607482	2.34564	5.56354e-19	0.120925	5.38369e-11	1.30306e-18	0.149099	2.18836e-10	L	Lost
chr1	150670367	150670762	59.5984	12.0566	30.4253	5.69036	23.0676	0	150670556	150670562	150670573	-	4.94737	2.70073	-2.23493	0.465801	8.88222e-19	4.98476e-07	0.261361	2.0409e-18	1.96501e-06	0.328927	L	Lost
chr1	151928580	151929048	60.3937	58.9567	32.8871	28.7553	30.8033	12.9304	151928795	151928807	151928818	+	18.4737	3.13891	-0.0415835	3.09732	3.86029e-21	0.911945	1.21256e-19	1.10625e-20	0.923056	1.22385e-18	BS	Book
chr1	151976984	151977431	51.6897	9.45756	25.0211	3.86158	24.1535	0	151977166	151977201	151977212	-	2.80702	2.31445	-2.50044	-0.185992	6.06293e-13	6.12216e-07	0.688933	8.29804e-13	2.35243e-06	0.746982	L	Lost
chr1	152239905	152240262	33.2492	41.5822	19.1125	20.8383	22.3898	15.1319	152240089	152240143	152240154	+	0.877193	1.97802	0.323556	2.30158	0.0249001	0.765929	0.00918521	0.0249067	0.792073	0.0153168	BS	Book
chr1	152344009	152344444	52.9656	9.06988	29.5921	3.47389	23.0308	0	152344263	0	0	0	0	2.28144	-2.55297	-0.27153	2.13026e-12	4.89565e-07	0.562632	2.80602e-12	1.9346e-06	0.63371	L	Lost
chr1	152840649	152841016	87.9145	19.2977	49.9947	8.20013	37.9813	0	152840836	152840825	152840836	+	10.5965	2.4294	-2.19354	0.235857	2.39216e-13	1.47449e-06	0.557879	3.37309e-13	5.06877e-06	0.629586	L	Lost
chr1	152902539	152903182	117.435	22.185	50.8137	7.81245	36.9585	0	152902722	152902687	152902698	-	6.89474	2.86289	-2.35571	0.507177	1.0445e-23	2.10724e-09	0.152601	3.783e-23	1.67029e-08	0.203746	L	Lost
chr1	152950284	152950632	41.229	19.0095	20.3884	8.78166	11.6283	0	152950479	152950469	152950480	-	15.7018	2.08381	-1.13498	0.948829	5.79686e-10	0.0103787	0.0160556	6.59729e-10	0.0154927	0.0257802	L	Lost
chr1	153024576	153025334	155.893	30.9717	47.1472	8.58782	40.1364	0	153024965	153024954	153024965	-	3.66667	2.5728	-2.33186	0.240937	5.28915e-20	9.78024e-10	0.471184	1.36111e-19	8.54242e-09	0.54651	L	Lost
chr1	153025673	153026115	54.5704	11.8679	29.5731	4.1498	14.2181	0	153025790	0	0	0	0	2.48375	-2.20455	0.279204	1.42005e-11	2.16365e-05	0.551152	1.76897e-11	5.4494e-05	0.623231	L	Lost
chr1	153067313	153068355	102.451	35.4098	29.1873	10.2329	29.2618	6.82975	153067431	153067663	153067674	-	5.5614	2.84805	-1.53209	1.31596	5.06581e-21	7.38028e-05	0.00011809	1.43488e-20	0.000163975	0.000250886	L	Lost
chr1	153081038	153082072	196.956	102.661	42.4481	22.866	41.679	19.6833	153081528	153081552	153081563	+	13.9474	3.41373	-0.940677	2.47306	2.08125e-33	0.00593201	6.54175e-17	1.77267e-32	0.00924328	4.94443e-16	BA	Book
chr1	153082742	153083215	73.7066	8.78166	34.5631	3.66774	26.306	0	153082914	153082975	153082986	+	9.47368	2.60794	-3.10639	-0.498448	1.35478e-13	1.2998e-08	0.319425	1.94919e-13	8.14665e-08	0.391966	L	Lost
chr1	153097702	153098074	51.6849	16.7879	25.8401	7.81753	15.8589	0	153097957	153097944	153097955	-	6.66667	2.41021	-1.61778	0.792435	1.37483e-12	0.000408074	0.0541717	1.83223e-12	0.0007833	0.0793699	L	Lost
chr1	153140579	153141311	104.194	21.0321	35.4248	5.01446	22.6566	0	153140970	153141183	153141194	-	6.78947	2.46732	-2.29499	0.172339	3.75338e-19	4.32878e-09	0.624057	8.93717e-19	3.13663e-08	0.6901	L	Lost
chr1	153152067	153152416	85.2772	14.8597	48.6761	6.07804	44.3935	0	153152225	153152186	153152197	-	14.5789	2.78958	-2.5326	0.256975	1.93946e-15	2.44588e-07	0.559262	3.26917e-15	1.05138e-06	0.630689	L	Lost
chr1	153190641	153191555	128.729	71.2965	36.2723	19.6803	31.6164	10.7746	153191336	153191437	153191448	-	3.05263	2.48404	-0.847862	1.63618	5.7386e-13	0.0475276	5.15758e-06	7.87193e-13	0.0631982	1.27523e-05	BS	Book
chr1	153255008	153255687	91.9953	35.9862	39.9483	13.0258	49.6583	6.69309	153255246	153255378	153255389	+	4.85965	3.20756	-1.34631	1.86125	2.30497e-21	0.00126067	5.33159e-07	6.75193e-21	0.00221156	1.45291e-06	L	Lost
chr1	153274210	153274678	62.4554	16.2115	23.7167	5.59598	29.556	0	153274406	153274467	153274478	-	6.24561	2.81133	-1.97126	0.84007	8.07232e-20	3.62917e-06	0.0332218	2.03854e-19	1.11862e-05	0.0506522	L	Lost
chr1	153286538	153287570	183.938	147.827	76.9637	44.6735	103.851	33.9567	153286926	153286905	153286916	-	16.3333	3.23138	-0.319601	2.91178	3.26504e-34	0.308594	7.2725e-27	2.9735e-33	0.351146	1.6799e-25	BS	Book
chr1	153314839	153315449	92.0001	54.4294	33.7061	21.7131	32.7619	16.2146	153315111	153315075	153315086	+	16.9298	3.04175	-0.774732	2.26702	4.70267e-19	0.0600711	2.8168e-10	1.10878e-18	0.0783395	1.06416e-09	BS	Book
chr1	153348263	153348832	80.7109	33.377	32.8966	12.9264	30.7006	9.44458	153348448	153348497	153348508	-	13.7895	2.74435	-1.2532	1.49115	6.22447e-15	0.00458222	0.000108076	1.00468e-14	0.00726922	0.00023084	L	Lost
chr1	153417770	153418437	97.0138	48.6345	32.4918	14.0894	18.5117	3.06156	153417970	153417990	153418001	+	6.42105	2.08138	-1.0105	1.07088	9.7189e-14	0.00461651	0.000478139	1.41584e-13	0.00731848	0.000944065	L	Lost
chr1	153420651	153421673	112.341	152.747	31.6111	38.3072	34.5814	26.2793	153421039	153421017	153421028	+	17.0877	2.69144	0.439781	3.13122	1.18708e-20	0.194861	2.47963e-27	3.25479e-20	0.230963	6.10161e-26	BS	Book
chr1	153487953	153488363	50.4279	16.2115	24.1641	8.2996	18.7421	0	153488148	153488182	153488193	-	10.7719	2.92249	-1.66094	1.26156	5.90694e-18	0.000193912	0.0023305	1.25259e-17	0.000396338	0.00421899	L	Lost
chr1	153531313	153531650	47.0902	12.6382	24.1783	6.27189	13.7992	0	153531478	153531442	153531453	-	2.80702	2.17873	-1.87487	0.303863	6.49162e-12	4.15183e-05	0.46678	8.26381e-12	9.75309e-05	0.542365	L	Lost
chr1	153532670	153533296	99.5847	28.7502	36.2628	9.06988	21.1125	0	153532885	153532934	153532945	-	14.1579	2.36553	-1.7814	0.584126	5.61133e-15	9.65548e-06	0.0972607	9.08831e-15	2.662e-05	0.135705	L	Lost
chr1	153725568	153725843	42.0148	5.8842	25.3784	3.95596	19.8544	0	153725731	153725592	153725603	-	3.96491	2.40941	-2.77966	-0.370252	3.12221e-12	1.25396e-06	0.492791	4.06375e-12	4.39891e-06	0.567519	L	Lost
chr1	153727836	153728219	76.2775	9.55194	47.9282	3.47389	42.851	0	153728042	0	0	0	0	2.84969	-2.99563	-0.145944	1.01051e-20	5.61223e-10	0.747377	2.78778e-20	5.29294e-09	0.796581	L	Lost
chr1	153747180	153747456	36.2058	4.63186	20.8122	3.47389	17.1298	0	153747298	153747252	153747263	-	1.2807	2.18697	-3.00083	-0.813866	2.76543e-10	1.84924e-06	0.172734	3.19747e-10	6.17926e-06	0.227583	L	Lost
chr1	153813060	153813867	176.967	65.0297	57.4749	20.9377	61.545	9.16403	153813423	153813408	153813419	-	17.9123	4.03935	-1.44256	2.59679	5.14021e-52	4.13223e-06	3.73471e-19	2.0118e-50	1.25577e-05	3.56885e-18	L	Lost
chr1	153824645	153825132	77.8539	10.8043	32.9061	3.95596	29.8687	0	153824907	153824976	153824987	-	5.61404	3.37233	-2.80711	0.565219	1.46696e-28	5.59365e-10	0.191852	8.23597e-28	5.28128e-09	0.24985	L	Lost
chr1	153844736	153845297	95.7947	23.7357	32.4728	10.2278	20.958	0	153845014	153844792	153844803	-	8.21053	2.65736	-2.01607	0.641284	4.75795e-20	3.08075e-07	0.0697985	1.22955e-19	1.28901e-06	0.100236	L	Lost
chr1	153878606	153879013	44.5715	41.6817	20.8216	17.27	11.2978	5.9156	153878804	153878755	153878766	-	13.0702	1.93962	-0.0972336	1.84238	1.115e-09	0.801161	3.00118e-08	1.2522e-09	0.824162	9.28765e-08	L	Lost
chr1	153917643	153918035	54.5989	7.33039	28.3446	4.92008	20.8476	0	153917756	153917939	153917950	-	3.35088	2.62219	-2.82292	-0.200728	7.96479e-14	2.70348e-07	0.694068	1.16888e-13	1.14973e-06	0.751355	L	Lost
chr1	153957897	153958265	43.2955	8.68728	25.8259	4.1498	14.791	0	153958182	153958160	153958171	+	9.64912	2.14299	-2.42254	-0.279554	2.12425e-11	2.35434e-06	0.558583	2.61912e-11	7.6508e-06	0.630154	L	Lost
chr1	153964514	153965410	151.579	174.832	54.1515	50.4582	55.0287	42.5178	153964940	153964917	153964928	-	16.5263	3.10731	0.205322	3.31263	1.71737e-34	0.484313	2.57407e-38	1.60804e-33	0.52726	2.40536e-36	BS	Book
chr1	154420237	154421047	516.598	31.3594	282.427	11.2914	235.864	3.61883	154420517	154420909	154420920	+	4.78947	4.66974	-4.0513	0.618435	6.79806e-77	1.43067e-31	0.0502393	1.73442e-74	6.93529e-28	0.0740947	L	Lost
chr1	154542581	154542984	57.856	29.3266	24.1499	13.6023	13.2357	6.09363	154542797	154542611	154542622	-	5.61404	2.13523	-0.954831	1.1804	9.66159e-14	0.00969189	0.000309104	1.4081e-13	0.0145423	0.000624745	L	Lost
chr1	154593512	154593767	48.7852	11.5746	32.944	7.71807	17.6815	3.192	154593663	0	0	0	0	2.62315	-2.02854	0.59461	1.44334e-09	0.000519885	0.252166	1.61346e-09	0.000976219	0.318592	L	Lost
chr1	154626479	154626802	45.4617	34.9328	20.8643	18.3336	10.2761	4.7852	154626660	154626619	154626630	-	4.91228	1.57402	-0.398404	1.17561	1.03007e-06	0.326139	0.000664173	1.05701e-06	0.369203	0.00128918	L	Lost
chr1	154639969	154640646	241.122	120.9	80.8248	46.9894	73.1113	29.8363	154640432	154640402	154640413	+	7.15789	3.55572	-0.998134	2.55759	9.62548e-39	0.0024223	2.47555e-19	1.29355e-37	0.0040405	2.41596e-18	BA	Book
chr1	154640680	154641254	108.331	27.8855	39.5863	9.84016	27.8824	0	154641021	154641043	154641054	-	2.08772	2.40929	-1.96509	0.444191	2.37662e-16	6.93838e-07	0.201949	4.35194e-16	2.62797e-06	0.261455	L	Lost
chr1	154650930	154651316	39.0866	13.7961	21.2406	5.11392	15.4299	0	154651155	154651153	154651164	+	4.49123	2.70552	-1.48783	1.21769	3.14328e-12	0.00333708	0.00841766	4.09055e-12	0.00543026	0.0141153	L	Lost
chr1	154662903	154664453	227.429	191.233	49.1567	33.1933	43.4775	18.3882	154663948	154663049	154663060	+	17.8772	2.41461	-0.249974	2.16464	4.69195e-29	0.34095	1.4434e-22	2.75025e-28	0.384457	2.01725e-21	BS	Book
chr1	154675380	154675639	37.4913	9.74578	21.6691	6.07804	10.3061	0	154675558	154675506	154675517	-	0.859649	1.82776	-1.96248	-0.134713	3.51397e-08	9.22959e-05	0.768547	3.7274e-08	0.000201485	0.814819	L	Lost
chr1	154745620	154748129	336.179	312.61	87.4765	72.3601	90.2797	64.4467	154747088	154747073	154747084	-	17.8772	3.27626	-0.104775	3.17149	1.05076e-34	0.744401	4.37457e-32	1.00325e-33	0.772871	1.89581e-30	BS	Book
chr1	154762652	154763384	447.676	30.6784	250.587	9.93454	236.759	6.23856	154763040	154763262	154763273	-	2.17544	4.52938	-3.84863	0.680751	1.20785e-67	2.74993e-27	0.0350071	1.56435e-65	3.11045e-24	0.0531973	L	Lost
chr1	154764099	154765025	146.561	53.5394	54.961	18.8106	51.3292	9.22934	154764222	154764172	154764183	+	15.1404	2.42736	-1.4375	0.989858	2.0982e-15	0.000226653	0.00280957	3.5265e-15	0.000456874	0.00503711	L	Lost
chr1	154789955	154790372	71.6781	10.034	43.7715	5.11392	39.0151	0	154790251	154789948	154789959	+	10.7193	2.65771	-2.82707	-0.169362	1.98549e-17	5.66021e-09	0.706848	4.01774e-17	3.96671e-08	0.762363	L	Lost
chr1	154832744	154833455	120.711	24.029	52.4612	7.62369	51.6311	0	154833177	154833127	154833138	-	17.8772	3.14742	-2.35422	0.793197	4.71663e-22	5.81116e-08	0.0402342	1.47199e-21	3.00641e-07	0.0604796	L	Lost
chr1	154839332	154840917	249.441	97.264	49.5805	14.3776	30.009	7.29035	154839611	154840391	154840402	-	16.1579	2.72516	-1.36212	1.36304	5.12925e-17	0.000812916	5.64428e-05	9.99718e-17	0.00147527	0.000124611	L	Lost
chr1	154855249	154857058	633.377	365.409	145.799	66.5804	119.138	49.7746	154856509	154855828	154855839	-	17.3158	4.32417	-0.79485	3.52932	2.30496e-64	0.00929926	2.81164e-42	2.37733e-62	0.0139916	4.18453e-40	BA	Book
chr1	154878435	154879208	395.606	107.387	195.67	40.3248	131.327	27.4038	154878668	154878655	154878666	-	12.4561	3.69021	-1.88109	1.80911	2.726e-28	6.00611e-06	1.96391e-07	1.49437e-27	1.7491e-05	5.59166e-07	BA	Book
chr1	154879314	154880016	87.9524	42.1637	38.334	14.9592	19.7023	6.92349	154879407	154879377	154879388	-	5.45614	2.13967	-1.06015	1.07952	1.54716e-11	0.00864008	0.00176271	1.92349e-11	0.0130722	0.00324511	L	Lost
chr1	154880225	154881322	153.308	22.4783	31.6586	3.95596	18.989	0	154880856	154880993	154881004	+	3	1.96321	-2.75222	-0.789003	5.88473e-11	8.95429e-11	0.0327431	7.06155e-11	1.0665e-09	0.0499897	L	Lost
chr1	154886840	154888001	816.966	329.597	259.992	93.104	186.426	91.8322	154887489	154887448	154887459	+	9.07018	4.42572	-1.30983	3.11588	4.22699e-57	0.000105951	2.77716e-28	2.49886e-55	0.000228355	7.61206e-27	BA	Book
chr1	154890600	154890810	25.8259	3.66774	20.0074	2.31593	10.1128	0	154890696	154890670	154890681	+	3.70175	2.31229	-2.91759	-0.605295	1.31194e-09	3.39121e-05	0.369961	1.46943e-09	8.14278e-05	0.445428	L	Lost
chr1	154939637	154940829	144.094	68.0215	30.0111	12.2505	16.1735	0	154940439	154940198	154940209	+	4.49123	1.89077	-1.08252	0.808248	4.1084e-15	0.000471806	0.00217377	6.73415e-15	0.000893753	0.00395255	L	Lost
chr1	154942204	154943696	365.281	144.83	80.3157	29.0435	80.7398	13.4519	154942680	154943199	154943210	-	9.50877	2.87776	-1.33653	1.54123	8.44532e-27	6.56901e-05	3.43658e-08	4.05741e-26	0.000147317	1.05676e-07	BA	Book
chr1	154944241	154944916	114.512	44.7679	37.4723	12.7376	24.1894	4.08573	154944818	154944845	154944856	+	17.8772	2.24821	-1.35316	0.895053	8.11529e-10	0.0036417	0.022165	9.16942e-10	0.0058839	0.0348448	L	Lost
chr1	154956273	154956759	64.5646	19.7798	26.6496	7.62369	17.8321	0	154956663	154956619	154956630	-	13.9474	2.45079	-1.7099	0.740888	2.74162e-14	7.92725e-05	0.0561275	4.18927e-14	0.000175287	0.0820301	L	Lost
chr1	154974146	154974586	60.8316	11.2863	21.6881	3.76211	10.951	0	154974331	154974352	154974363	+	7.61404	1.81938	-2.38588	-0.566505	2.95069e-09	3.96083e-07	0.183436	3.25136e-09	1.6027e-06	0.239968	L	Lost
chr1	155033343	155034230	117.317	39.0724	36.6201	13.1202	31.5964	7.4278	155033525	155033567	155033578	+	9.64912	2.62542	-1.57649	1.04894	1.60896e-15	0.000184571	0.00382615	2.73271e-15	0.000379097	0.00673931	L	Lost
chr1	155167299	155168328	195.251	64.7415	56.199	22.0957	55.5567	12.9509	155167787	155167791	155167802	-	13.7895	2.72277	-1.59274	1.13002	1.68774e-17	8.19922e-05	0.00092338	3.43655e-17	0.000180665	0.00176147	BA	Book
chr1	155174208	155175242	113.264	51.5269	37.0486	14.2833	37.9158	9.17676	155174591	155174593	155174604	+	7.63158	2.74303	-1.14539	1.59764	2.03412e-24	0.000661912	7.21034e-08	7.88484e-24	0.00122076	2.14396e-07	L	Lost
chr1	155194947	155195347	42.4765	5.59598	23.3214	2.60415	17.9262	0	155195099	155195316	155195327	-	-0.263158	2.81794	-2.91766	-0.0997285	1.29416e-17	2.41557e-07	0.854979	2.66166e-17	1.04046e-06	0.886133	L	Lost
chr1	155220938	155221615	83.6676	34.2518	23.3166	10.9037	13.411	0	155221399	155221126	155221137	-	11.0526	2.3209	-1.28746	1.03345	9.3248e-14	0.00132464	0.00302441	1.36047e-13	0.00231647	0.00539917	L	Lost
chr1	155221725	155222935	156.117	54.126	34.1298	14.1838	25.4487	4.67498	155222684	155222684	155222695	-	15.3333	2.71537	-1.52438	1.19099	2.06425e-23	1.13849e-05	7.61431e-05	7.28812e-23	3.08147e-05	0.000165562	L	Lost
chr1	155223440	155224538	187.542	25.664	51.247	7.81245	36.9107	0	155223544	155224455	155224466	-	-0.438596	2.9167	-2.86392	0.0527853	4.89278e-22	5.20176e-12	0.884886	1.52556e-21	8.8167e-11	0.910396	L	Lost
chr1	155271802	155272261	116.621	44.7679	54.5799	17.4639	38.0427	8.71302	155272036	155272055	155272066	+	17.8772	3.0551	-1.37881	1.67629	2.29242e-22	0.000429723	1.04298e-06	7.35729e-22	0.000820954	2.76799e-06	L	Lost
chr1	155305090	155305609	63.246	8.97042	32.0301	4.92008	39.9426	0	155305377	155305258	155305269	+	6.89474	3.10149	-2.75817	0.343328	2.9667e-17	2.65486e-07	0.490262	5.90712e-17	1.13146e-06	0.56516	L	Lost
chr1	155323097	155323782	100.351	15.5305	41.5864	7.33039	38.0413	0	155323565	155323547	155323558	-	11.1754	2.90411	-2.65882	0.245286	8.86508e-15	2.25704e-07	0.589329	1.4113e-14	9.80544e-07	0.65912	L	Lost
chr1	155336786	155337485	129.458	65.8995	39.1103	18.1398	37.2443	12.9753	155336898	155337202	155337213	+	13.7193	2.92926	-0.974708	1.95455	1.7327e-28	0.00262885	7.43467e-12	9.66397e-28	0.004354	3.30557e-11	BA	Book
chr1	155339431	155341489	358.963	184.772	64.9552	35.4098	65.6896	32.9354	155339799	155339812	155339823	+	17.3158	3.03335	-0.958608	2.07474	2.62408e-22	0.0129483	7.5625e-11	8.37576e-22	0.0190057	3.03116e-10	BA	Book
chr1	155343104	155343628	87.8765	20.6495	42.0575	9.93962	40.8102	2.07949	155343221	155343299	155343310	+	11.2982	3.21238	-2.10482	1.10756	7.31054e-27	1.47073e-07	0.0028496	3.53827e-26	6.74102e-07	0.00510535	L	Lost
chr1	155354667	155355054	51.247	40.6181	29.1636	19.1039	15.2977	6.45076	155354781	155354754	155354765	+	14.3158	1.91864	-0.328002	1.59064	7.69532e-12	0.342985	1.30432e-07	9.74966e-12	0.386597	3.7903e-07	L	Lost
chr1	155355777	155356565	62.4887	95.5143	21.6786	34.5451	12.7012	13.661	155356187	155356368	155356379	+	9.29825	1.60487	0.617247	2.22212	7.88682e-10	0.045882	7.96188e-18	8.91543e-10	0.0611634	6.61534e-17	BS	Book
chr1	155379765	155380788	398.064	146.758	168.597	50.3689	176.433	38.5732	155380166	155380380	155380391	+	17.8772	4.29358	-1.4411	2.85248	1.95965e-58	6.16205e-06	8.59725e-25	1.29371e-56	1.78853e-05	1.56256e-23	BA	Book
chr1	155407915	155408293	47.076	6.56519	24.1736	4.05542	14.5783	0	155408104	0	0	0	0	2.0387	-3.01414	-0.975435	5.21043e-10	1.72091e-07	0.070817	5.94404e-10	7.71558e-07	0.101552	L	Lost
chr1	155426546	155427262	50.352	69.7661	12.5082	23.2588	10.2464	13.3902	155426839	155426811	155426822	-	17.0877	2.25571	0.460942	2.71665	6.7133e-13	0.204872	5.07279e-18	9.15678e-13	0.241697	4.298e-17	BS	Book
chr1	155435636	155436206	65.7315	21.0372	21.6501	7.42985	12.8832	0	155435840	155435853	155435864	+	17.3158	2.37961	-1.66989	0.709721	7.48382e-13	0.000165497	0.0709647	1.01705e-12	0.000342991	0.101747	L	Lost
chr1	155446032	155446749	156.108	26.2506	62.427	9.36318	69.0074	2.97038	155446207	155446188	155446199	+	14.3158	3.2226	-2.60814	0.614459	4.3823e-25	4.54183e-10	0.0980737	1.80336e-24	4.41851e-09	0.136749	L	Lost
chr1	155459354	155459626	44.5573	4.92008	33.7203	3.28005	29.1307	0	155459451	155459401	155459412	+	6.07018	3.10436	-3.14658	-0.0422293	4.8032e-16	5.36209e-07	0.943977	8.56263e-16	2.09167e-06	0.957349	L	Lost
chr1	155481524	155482200	47.076	75.4565	14.9889	24.3173	5.82926	10.2364	155481735	155481706	155481717	+	15.3333	1.40808	0.675109	2.08319	3.863e-06	0.0634791	4.3054e-12	3.93655e-06	0.0824417	1.9534e-11	BM	Book
chr1	155524844	155525477	113.664	15.2474	50.4042	5.5016	32.4804	0	155525026	155525101	155525112	-	2.05263	2.49994	-2.93509	-0.435147	1.36964e-18	8.8107e-12	0.265524	3.09552e-18	1.40034e-10	0.333408	L	Lost
chr1	155540285	155540743	54.961	12.1561	27.4686	5.11392	20.0416	0	155540452	155540384	155540395	-	4.01754	2.07652	-2.15963	-0.0831135	3.43983e-11	3.41967e-06	0.844083	4.1883e-11	1.06215e-05	0.877321	L	Lost
chr1	155551792	155552532	101.166	24.4015	25.7879	9.06479	28.6339	3.90365	155552126	155552099	155552110	-	14.807	2.69383	-2.0013	0.692532	9.27181e-17	3.28228e-06	0.067562	1.76357e-16	1.02369e-05	0.0972793	L	Lost
chr1	155595788	155596704	232.042	87.2147	102.527	29.9082	79.9405	16.8699	155596471	155596471	155596482	-	15.3333	2.89514	-1.40649	1.48865	1.37967e-22	0.000145079	1.88799e-06	4.51721e-22	0.000304018	4.88189e-06	BA	Book
chr1	155667923	155668595	53.3657	83.1745	18.7789	24.8937	14.4732	11.0664	155668249	155668278	155668289	-	14.5789	1.7131	0.635814	2.34891	1.16813e-09	0.0548711	3.15681e-17	1.31096e-09	0.0721291	2.48135e-16	BS	Book
chr1	155787416	155788205	130.263	110.002	59.5177	34.8333	72.8581	23.71	155787747	155787723	155787734	-	17.8772	3.30928	-0.248492	3.06079	2.21581e-28	0.478717	1.79111e-23	1.22318e-27	0.521754	2.78797e-22	BS	Book
chr1	155856429	155856992	52.0755	44.9617	25.4211	19.2033	22.2786	8.83313	155856650	155856650	155856661	-	16.5614	2.41671	-0.211283	2.20542	1.1184e-13	0.586421	9.11003e-11	1.62051e-13	0.625323	3.62022e-10	L	Lost
chr1	155883514	155884285	138.785	22.5778	59.679	6.85341	73.5353	0	155884061	155883788	155883799	+	10.5439	2.9946	-2.62238	0.372218	1.63165e-32	3.74924e-13	0.261606	1.2876e-31	8.74986e-12	0.329207	L	Lost
chr1	155884488	155884958	92.0238	22.2896	41.6196	9.45756	41.8828	0	155884771	155884762	155884773	-	17.8772	3.03839	-2.05733	0.981061	9.72779e-24	3.61392e-07	0.00775944	3.53608e-23	1.48034e-06	0.0130677	L	Lost
chr1	155926010	155926580	63.6128	40.136	27.0164	16.4053	33.0853	4.43827	155926258	155926275	155926286	-	16.1228	1.9282	-0.66164	1.26656	1.18415e-06	0.183124	0.00237135	1.21395e-06	0.218171	0.00428928	L	Lost
chr1	155927549	155928866	262.905	60.5024	69.6305	10.6155	58.4925	0	155927996	155927713	155927724	+	3.40351	2.58897	-2.13008	0.458893	2.539e-24	1.60467e-10	0.10757	9.75056e-24	1.76724e-09	0.148702	L	Lost
chr1	155930912	155931229	36.6343	20.2669	21.2501	9.36318	19.4704	3.06058	155931064	155931038	155931049	-	17.3158	2.47859	-0.894325	1.58427	1.55578e-11	0.052032	0.000132008	1.93379e-11	0.068687	0.000278865	L	Lost
chr1	155937504	155938787	219.02	62.6194	66.6454	15.9233	58.1785	7.37304	155938459	155937526	155937537	-	7	2.90107	-1.80713	1.09394	2.17987e-18	1.67445e-05	0.00198817	4.82357e-18	4.33964e-05	0.00363593	L	Lost
chr1	155995951	155996692	89.1383	40.5339	23.7594	15.6351	12.9167	6.21675	155996259	155996273	155996284	+	12.8596	2.02599	-1.16824	0.857751	1.49836e-12	0.00162428	0.00733386	1.99115e-12	0.00279255	0.0123928	L	Lost
chr1	156385570	156386634	57.9224	131.61	16.2412	39.5646	12.691	35.1958	156386184	156386259	156386270	-	16.5263	2.52761	1.18277	3.71038	4.51265e-13	0.00305814	1.27739e-27	6.2417e-13	0.00501144	3.26398e-26	BM	Book
chr1	156569750	156570391	76.5921	31.9359	22.8882	9.84016	18.8687	3.52788	156570185	156570135	156570146	+	16.5614	2.70405	-1.25945	1.4446	1.94572e-19	0.000932542	2.18838e-05	4.74242e-19	0.00167508	5.05605e-05	L	Lost
chr1	156596024	156596338	35.4106	17.4639	22.4929	8.87604	13.6692	0	156596176	156596211	156596222	+	6.78947	2.23573	-1.0207	1.21502	3.70233e-11	0.0200191	0.00221238	4.49969e-11	0.0284099	0.00401759	L	Lost
chr1	156659936	156660671	90.7478	41.8755	36.6391	16.4053	37.866	6.29949	156660227	156660055	156660066	-	8.78947	2.8697	-1.11848	1.75122	5.93113e-19	0.00516047	6.02174e-07	1.3861e-18	0.00811522	1.6326e-06	L	Lost
chr1	156667040	156667759	164.535	20.5551	70.459	7.14163	70.8694	0	156667241	156667199	156667210	+	7.85965	3.28139	-3.03723	0.244158	1.41375e-35	1.82292e-15	0.486895	1.45152e-34	8.04386e-14	0.561966	L	Lost
chr1	156690029	156690903	94.4381	35.2159	27.8402	8.58782	30.6889	0	156690210	156690240	156690251	-	9.22807	2.17883	-1.41928	0.759545	3.76308e-15	9.77878e-05	0.0170234	6.18816e-15	0.000212313	0.0272376	L	Lost
chr1	156899988	156900697	108.689	21.5142	37.9293	7.33039	23.5304	0	156900233	156900227	156900238	+	15.1754	2.33025	-2.32093	0.00931723	1.71905e-17	2.58242e-09	0.978676	3.49735e-17	1.99475e-08	0.984041	L	Lost
chr1	156907429	156908759	245.774	189.513	43.7477	40.5288	26.5238	27.146	156907777	156907791	156907802	-	18.1053	2.65362	-0.378978	2.27464	8.21062e-27	0.209303	2.60515e-19	3.94969e-26	0.246445	2.53442e-18	BS	Book
chr1	156933090	156933430	46.2427	24.7993	20.4311	11.0976	12.9943	0	156933298	156933227	156933238	-	15.3333	2.51418	-0.917172	1.59701	2.54143e-15	0.0212823	1.00129e-05	4.24172e-15	0.0300492	2.40101e-05	L	Lost
chr1	156957092	156957586	98.2613	13.1253	55.8132	4.63186	53.279	0	156957417	156957392	156957403	+	6.14035	2.85787	-2.95792	-0.100041	4.41777e-21	9.49309e-11	0.811911	1.25836e-20	1.12084e-09	0.850195	L	Lost
chr1	156958251	156959208	238.504	38.5904	89.9288	8.39397	97.2631	3.2463	156958783	156958787	156958798	+	7.89474	3.57324	-2.61577	0.957467	6.48493e-40	1.80859e-13	0.00246483	9.59254e-39	4.6493e-12	0.00445007	L	Lost
chr1	157094384	157094771	44.9431	13.2197	21.2169	7.14163	12.6305	0	157094653	157094653	157094664	-	5.07018	2.06988	-1.78492	0.284963	2.91797e-10	0.000137134	0.500959	3.36925e-10	0.000288724	0.575478	L	Lost
chr1	157097958	157098234	33.344	4.5324	24.1831	2.60415	16.4877	0	157098098	0	0	0	0	3.06515	-2.75971	0.305438	1.57119e-12	3.43446e-05	0.629915	2.08596e-12	8.23616e-05	0.695096	L	Lost
chr1	157279960	157280629	64.1836	17.6577	24.9736	5.59598	24.6296	0	157280248	157280195	157280206	-	13.7193	2.96528	-1.87229	1.09299	5.23489e-22	6.01606e-06	0.00458013	1.62759e-21	1.75155e-05	0.00797585	L	Lost
chr1	157285668	157286611	254.192	66.5804	119.587	19.2033	112.966	7.36812	157285980	157286001	157286012	+	17.8772	3.63972	-1.9415	1.69823	5.82094e-46	1.2951e-09	1.94428e-09	1.43444e-44	1.09076e-08	6.75977e-09	L	Lost
chr1	157338411	157339184	119.968	22.4783	55.4037	8.39397	40.1198	0	157338842	157338813	157338824	-	5.7193	2.86731	-2.39725	0.470057	6.26727e-22	4.38126e-09	0.198598	1.93246e-21	3.16992e-08	0.257756	L	Lost
chr1	157411932	157412332	37.0581	16.112	21.2549	7.62369	13.3689	0	157412114	157412106	157412117	+	6.2807	1.97928	-1.1899	0.789383	1.40612e-10	0.00460701	0.0379164	1.65226e-10	0.00730546	0.0572594	L	Lost
chr1	157493577	157493827	30.3921	8.78166	21.6454	4.63186	14.0743	0	157493709	157493679	157493690	+	7.36842	1.91573	-1.83457	0.0811621	7.43503e-09	0.00029353	0.862522	8.05815e-09	0.000578619	0.892397	L	Lost
chr1	157542288	157542825	56.6275	62.8183	22.4739	21.7131	17.9723	12.3284	157542612	157542591	157542602	-	17.3158	2.1306	0.138041	2.26864	4.4738e-14	0.678936	4.21541e-15	6.7104e-14	0.71207	2.60407e-14	BS	Book
chr1	157555349	157555966	63.3409	57.0336	31.2586	17.4639	25.2459	5.27483	157555490	157555519	157555530	+	13.2982	2.49192	-0.16779	2.32413	2.84988e-14	0.667987	7.04473e-12	4.34727e-14	0.701889	3.1396e-11	L	Lost
chr1	157564467	157564731	35.3773	6.17242	21.2359	3.08621	14.387	0	157564607	157564549	157564560	-	6.17544	2.45519	-2.4239	0.031286	8.23844e-11	3.3202e-05	0.954248	9.8055e-11	7.98812e-05	0.9654	L	Lost
chr1	157583268	157584338	128.282	80.6699	47.9092	22.7716	24.3878	9.75783	157583769	157583789	157583800	+	6.77193	2.36757	-0.676593	1.69098	4.42411e-16	0.0604801	2.9635e-08	7.91205e-16	0.0788184	9.17353e-08	L	Lost
chr1	157584429	157585262	116.355	141.848	36.1489	47.2827	69.3325	39.6661	157584928	157585023	157585034	-	6.10526	3.13651	0.283113	3.41963	1.56761e-14	0.562087	6.87058e-17	2.44389e-14	0.602175	5.18203e-16	BS	Book
chr1	157586572	157587339	82.8581	45.8314	27.9256	15.5356	21.0803	4.46186	157587027	157587040	157587051	-	8.87719	2.3713	-0.857228	1.51407	3.53483e-16	0.0183915	1.72593e-06	6.37392e-16	0.0262582	4.47854e-06	L	Lost
chr1	157660159	157660904	83.2344	58.6634	26.2449	14.9541	20.1516	4.24019	157660287	157660532	157660543	+	0.0526316	2.2972	-0.506144	1.79106	5.26579e-17	0.132222	8.24368e-10	1.02515e-16	0.161945	2.98254e-09	L	Lost
chr1	157842373	157843072	108.331	109.614	53.323	36.7616	51.7311	30.951	157842844	157842824	157842835	+	15.1404	3.59682	0.0126033	3.60942	1.96985e-36	0.968233	1.88792e-35	2.15831e-35	0.972532	1.23198e-33	BS	Book
chr1	157888337	157888971	67.817	18.6269	26.6164	5.69545	21.8843	0	157888758	157888844	157888855	-	3.89474	3.21135	-1.91327	1.29808	7.57349e-21	1.95014e-05	0.00168033	2.11376e-20	4.97252e-05	0.0031017	L	Lost
chr1	157905410	157906184	134.948	23.4475	57.0607	6.46573	51.2155	0	157905940	157905895	157905906	+	11.1754	3.01667	-2.53801	0.478653	3.37608e-30	7.55559e-12	0.157041	2.18627e-29	1.22321e-10	0.209024	L	Lost
chr1	157919205	157919966	272.305	72.3601	131.134	26.7276	118.419	14.5302	157919490	157919755	157919766	+	6.98246	3.80884	-1.90732	1.90152	6.76299e-51	1.27669e-09	9.02025e-12	2.38802e-49	1.07766e-08	3.97615e-11	BA	Book
chr1	157923289	157924429	353.62	106.533	149.17	30.4948	134.426	18.6709	157923895	157923953	157923964	-	17.8772	3.28727	-1.73998	1.54728	1.4004e-41	1.13575e-08	3.02896e-09	2.38674e-40	7.2565e-08	1.03205e-08	BA	Book
chr1	157958216	157958818	85.029	42.0541	27.5398	11.3807	14.2394	5.10876	157958499	157958215	157958226	-	6.4386	1.96691	-0.988295	0.978615	9.37086e-09	0.0231182	0.00774682	1.01175e-08	0.0324268	0.0130477	L	Lost
chr1	158104634	158105246	61.6459	38.8837	25.0068	13.3141	16.4563	5.96161	158105056	158105086	158105097	-	16.3333	2.24167	-0.665834	1.57583	3.4328e-16	0.0517155	2.06414e-07	6.19767e-16	0.0683171	5.86521e-07	L	Lost
chr1	158180798	158181557	190.399	33.0938	59.1225	10.5161	75.6249	5.18638	158181101	158181351	158181362	-	13.8421	4.18942	-2.52261	1.6668	2.28215e-39	3.77645e-10	4.97744e-06	3.24425e-38	3.76126e-09	1.23374e-05	L	Lost
chr1	158362628	158363188	44.9858	52.5803	20.0074	20.1675	10.1677	8.39457	158362865	158362860	158362871	-	13.614	1.84577	0.231058	2.07683	1.44004e-07	0.58405	5.25864e-09	1.50381e-07	0.62303	1.75252e-08	L	Lost
chr1	158495541	158496170	109.127	21.226	38.2913	5.59598	43.3343	0	158495705	158495744	158495755	+	9.73684	3.77755	-2.35781	1.41973	1.21907e-23	1.06232e-06	0.00112877	4.38996e-23	3.81337e-06	0.00212958	L	Lost
chr1	158510464	158511086	74.9162	20.5501	26.6591	7.23601	18.9646	0	158510784	158510938	158510949	-	14.0351	2.55419	-1.85724	0.696949	1.03913e-14	2.71834e-05	0.0766606	1.64454e-14	6.67593e-05	0.109244	L	Lost
chr1	158578667	158579665	213.754	81.0474	71.2354	23.4475	50.8484	8.30855	158579083	158579109	158579120	-	15.3333	3.20718	-1.39914	1.80805	9.61882e-35	1.49552e-05	1.17105e-10	9.20455e-34	3.92812e-05	4.60296e-10	L	Lost
chr1	158598811	158599142	71.2259	22.6772	41.267	10.4217	19.8856	0	158598985	158598937	158598948	-	2.80702	2.10569	-1.66972	0.435973	5.48477e-09	0.000488117	0.292352	5.9769e-09	0.000922077	0.362853	L	Lost
chr1	158599652	158600427	332.041	72.2606	134.534	25.4752	126.841	10.8132	158600000	158600186	158600197	-	10.2456	3.75973	-2.1928	1.56693	7.97966e-43	1.89089e-10	1.49841e-07	1.50096e-41	2.04083e-09	4.32691e-07	BA	Book
chr1	158639143	158639516	84.0866	22.9655	58.6892	11.5796	61.545	4.84602	158639389	158639205	158639216	+	3.78947	3.45369	-1.88617	1.56752	4.28582e-25	9.09187e-06	6.25968e-05	1.76644e-24	2.52653e-05	0.000137349	L	Lost
chr1	158700376	158701190	133.239	38.6898	34.5394	10.034	33.1612	0	158700912	158700948	158700959	-	17.0877	2.4312	-1.78188	0.649319	2.80932e-20	3.38367e-07	0.0338676	7.4313e-20	1.39783e-06	0.0515651	L	Lost
chr1	158885822	158887221	239.494	51.7157	58.694	9.64632	40.4062	0	158886754	158886098	158886109	+	7.80702	2.51114	-2.21076	0.300374	8.98705e-24	2.6701e-11	0.293739	3.27629e-23	3.70571e-10	0.364294	L	Lost
chr1	158890599	158890950	38.7056	15.3418	20.8216	6.94779	13.6317	0	158890784	158890664	158890675	-	7.21053	2.40734	-1.34375	1.06359	2.46951e-12	0.00323051	0.0106421	3.23844e-12	0.00526719	0.0175812	L	Lost
chr1	158893548	158894485	127.858	34.1574	36.1964	10.4217	40.3443	2.90837	158893978	158893948	158893959	+	14.0877	2.80923	-1.91228	0.896956	3.2428e-27	3.06793e-08	0.00375785	1.62346e-26	1.72644e-07	0.00662967	L	Lost
chr1	158913373	158914091	381.908	31.0661	163.33	9.55194	143.94	0	158913803	158913597	158913608	-	7.57895	4.08307	-3.61097	0.472095	2.86399e-48	1.81286e-21	0.162132	8.38514e-47	4.50718e-19	0.215093	L	Lost
chr1	158924771	158925834	241.541	94.4558	66.6312	26.2455	57.5694	13.083	158925467	158925489	158925500	-	18.1053	3.20727	-1.35198	1.85529	2.72693e-41	4.42784e-06	4.80712e-13	4.5337e-40	1.33508e-05	2.40625e-12	BA	Book
chr1	158927527	158928389	135.852	32.2292	34.62	9.45756	30.0565	2.11665	158927941	158927546	158927557	-	4.91228	2.76409	-2.09022	0.673871	4.32896e-24	1.09326e-08	0.0379713	1.6271e-23	7.01409e-08	0.0573371	L	Lost
chr1	159016335	159017674	250.045	77.6679	75.8585	12.1561	67.3568	3.40196	159016566	159016558	159016569	+	17.9123	2.74359	-1.68385	1.05975	3.11619e-29	6.89507e-08	7.52123e-05	1.86001e-28	3.49314e-07	0.000163664	L	Lost
chr1	159183612	159183874	34.1488	3.95596	24.1594	2.79799	18.8833	0	159183774	159183723	159183734	+	1.01754	2.58287	-3.11516	-0.532297	1.22847e-13	1.63092e-06	0.39663	1.77394e-13	5.53696e-06	0.472721	L	Lost
chr1	159364217	159364854	90.3004	38.5011	26.2259	11.3858	21.406	3.06058	159364601	159364587	159364598	-	17.8772	2.32356	-1.2411	1.08246	1.22105e-14	0.00131319	0.0012402	1.92179e-14	0.00229811	0.00232958	L	Lost
chr1	159373057	159373694	82.4343	26.8219	25.8401	9.06988	12.3426	0	159373314	159373101	159373112	-	5.64912	1.77129	-1.61548	0.155811	5.89602e-09	8.41009e-05	0.661146	6.41804e-09	0.000184927	0.722325	L	Lost
chr1	159388862	159389740	283.923	85.8782	78.1875	23.7408	74.7334	11.3	159389121	159389137	159389148	+	9.68421	3.4945	-1.73002	1.76447	7.60933e-33	1.9887e-06	1.38193e-08	6.17721e-32	6.59137e-06	4.4268e-08	BA	Book
chr1	159514219	159514834	49.5852	64.0707	14.5747	21.8075	11.2887	9.12582	159514571	159514577	159514588	+	16.3333	1.76928	0.363445	2.13272	1.26065e-08	0.32756	9.35145e-12	1.35484e-08	0.370661	4.11573e-11	L	Lost
chr1	159661090	159661856	262.001	96.9707	141.237	34.8282	162.579	27.7777	159661517	159661452	159661463	-	16.3333	4.54089	-1.43578	3.10511	8.2591e-46	0.000136624	1.27463e-20	2.00756e-44	0.000287704	1.44318e-19	BA	Book
chr1	159671412	159672213	95.39	23.3481	26.2591	5.69036	21.9244	0	159672042	159672032	159672043	-	8.26316	2.43287	-2.02088	0.411991	7.01912e-19	1.06587e-07	0.227502	1.63048e-18	5.09914e-07	0.290612	L	Lost
chr1	159673481	159674512	136.252	53.7383	34.5915	14.2782	34.4849	6.93987	159674037	159673941	159673952	-	15.1754	3.52678	-1.33465	2.19214	1.39802e-35	9.96862e-05	1.48533e-12	1.43624e-34	0.00021613	7.08586e-12	L	Lost
chr1	159727613	159728585	43.3193	83.7662	14.1604	22.0064	7.57321	11.9506	159728094	159728120	159728131	-	15.7895	1.42124	0.935281	2.35652	2.72941e-06	0.00861656	1.02577e-15	2.78523e-06	0.0130395	6.78637e-15	BM	Book
chr1	160145631	160146443	79.1963	22.7716	22.1118	5.98367	19.9257	0	160145815	160146307	160146318	-	13.7193	2.50461	-1.80688	0.697736	1.15692e-17	5.25395e-06	0.0503967	2.39011e-17	1.55339e-05	0.0743041	L	Lost
chr1	160207603	160208165	31.687	62.048	12.5224	27.5029	10.9945	15.0894	160207719	160207747	160207758	+	15.5614	1.64866	0.957431	2.60609	5.15865e-07	0.0110824	1.64854e-16	5.31917e-07	0.0164664	1.19326e-15	BM	Book
chr1	160224738	160225488	63.3361	21.9019	22.9119	5.40214	18.0123	0	160225122	160225081	160225092	-	1.03509	1.92472	-1.5303	0.394426	5.93912e-11	0.000144436	0.268222	7.12455e-11	0.000302782	0.336397	L	Lost
chr1	160481958	160482496	47.0665	62.1373	20.8169	21.9019	11.8908	11.9052	160482281	160482269	160482280	-	18.1053	1.86489	0.399095	2.26399	1.39977e-09	0.273242	2.49315e-13	1.56528e-09	0.314367	1.28279e-12	BS	Book
chr1	160506043	160506745	49.5805	96.106	21.2311	41.8806	18.9065	37.7234	160506550	160506578	160506589	-	14.5439	2.15768	0.950683	3.10836	7.29e-11	0.0127122	7.58968e-22	8.70169e-11	0.0186802	9.81481e-21	BM	Book
chr1	160705065	160706022	64.5267	85.7838	17.8982	21.0372	14.6858	10.7552	160705467	160705717	160705728	+	14.1579	2.38196	0.404984	2.78694	2.88041e-12	0.314242	3.64318e-16	3.76057e-12	0.356915	2.53068e-15	BS	Book
chr1	160723782	160724066	36.7055	17.1705	24.2068	10.6104	29.515	4.30978	160723921	160723860	160723871	-	15.1754	2.41037	-1.06132	1.34905	1.67528e-10	0.0275914	0.00177548	1.96059e-10	0.0381898	0.00326668	L	Lost
chr1	161009110	161009638	48.3519	12.2505	22.0929	3.95596	20.9318	0	161009499	161009561	161009572	-	5.78947	2.75081	-1.93369	0.817122	3.859e-14	0.00010068	0.0731379	5.82429e-14	0.000218033	0.104629	L	Lost
chr1	161065762	161066638	47.5424	95.8076	15.0174	26.3399	15.1626	15.9886	161066094	161066098	161066109	-	15.1404	2.23322	1.01245	3.24567	1.75469e-11	0.00754166	1.02955e-23	2.17425e-11	0.0115322	1.65493e-22	BM	Book
chr1	161349477	161349938	85.81	29.143	39.9958	11.4853	26.0877	3.66932	161349781	161349875	161349886	-	6.08772	2.47687	-1.58291	0.893957	7.74922e-19	1.92533e-05	0.00689419	1.79307e-18	4.91516e-05	0.0116918	L	Lost
chr1	161357941	161358224	47.4238	14.7653	31.6254	7.62369	19.6692	0	161358055	161358084	161358095	+	15.3333	2.29946	-1.72359	0.575864	2.30151e-11	0.000274918	0.177732	2.83064e-11	0.000544779	0.233346	L	Lost
chr1	161360014	161360450	67.3648	5.8842	36.5632	3.28005	40.196	0	161360254	161360294	161360305	+	0.192982	3.4517	-3.46842	-0.0167206	1.34568e-16	5.64105e-08	0.977632	2.51809e-16	2.92899e-07	0.983253	L	Lost
chr1	161442013	161442818	63.3504	107.686	26.2686	35.7031	19.9257	24.2106	161442228	161442220	161442231	+	9.84211	2.27884	0.762458	3.0413	6.24287e-10	0.0802165	8.03637e-17	7.09228e-10	0.102261	6.01452e-16	BS	Book
chr1	161445539	161446394	53.3182	82.0267	14.5937	28.4671	10.8194	14.1183	161446041	161446013	161446024	+	17.3158	1.72719	0.608702	2.33589	2.34742e-08	0.0973621	2.6673e-14	2.50189e-08	0.122295	1.51379e-13	BS	Book
chr1	161465668	161466044	50.0564	8.49344	26.7208	3.18567	27.296	0	161465895	161465776	161465787	-	6.70175	2.22571	-2.63487	-0.409164	4.7314e-11	8.35548e-07	0.407208	5.7109e-11	3.09021e-06	0.48295	L	Lost
chr1	161527128	161528154	90.8664	38.5954	23.7499	7.52423	18.8102	0	161527907	161527471	161527482	+	13.7193	2.38563	-1.23984	1.14579	7.96744e-16	0.00107702	0.000524748	1.3926e-15	0.00191214	0.00103129	L	Lost
chr1	161580285	161581624	485.773	53.4501	231.671	10.6104	206.498	4.65005	161580786	161580752	161580763	-	8.35088	4.07396	-3.17865	0.89531	8.77984e-59	5.2939e-22	0.00200354	5.87626e-57	1.52236e-19	0.00366187	L	Lost
chr1	161587043	161587441	62.4697	32.423	28.7209	14.1838	20.6046	3.33207	161587307	161587329	161587340	-	15.1754	2.27987	-0.964614	1.31526	1.57288e-14	0.0106352	8.1132e-05	2.45178e-14	0.0158546	0.000175914	L	Lost
chr1	161765271	161765766	69.9499	10.2278	31.6491	4.43802	26.5953	0	161765448	161765600	161765611	+	0.491228	2.55673	-2.78398	-0.227254	8.84412e-18	3.31914e-09	0.604474	1.84659e-17	2.48558e-08	0.672497	L	Lost
chr1	161937379	161938168	182.147	58.1814	70.4401	18.7213	66.5295	8.59548	161937762	161937772	161937783	+	14.1579	3.4764	-1.64836	1.82804	2.39176e-43	1.34624e-07	8.2356e-11	4.67779e-42	6.2535e-07	3.28775e-10	L	Lost
chr1	161973674	161974696	103.732	46.209	23.3166	9.64632	13.4943	2.29186	161973986	161974003	161974014	+	18.1053	2.14987	-1.14883	1.00103	1.42721e-14	0.00134596	0.00117877	2.23311e-14	0.00235085	0.00221959	L	Lost
chr1	162084705	162085407	88.7382	63.8768	25.4069	17.4639	17.2245	7.51219	162085172	162085177	162085188	+	2.63158	2.21498	-0.480915	1.73406	7.27217e-18	0.128284	2.53636e-10	1.52986e-17	0.157446	9.63466e-10	L	Lost
chr1	162139875	162140303	85.3815	6.75395	53.7799	2.99183	47.3762	0	162140145	162140050	162140061	-	-0.368421	3.26511	-3.66033	-0.395221	1.82623e-25	8.70911e-12	0.440407	7.79489e-25	1.38615e-10	0.516319	L	Lost
chr1	162205541	162206171	62.8982	30.5841	26.6544	11.2863	13.9953	4.75331	162205685	162205737	162205748	+	9.80702	2.70836	-1.03263	1.67573	3.89337e-18	0.00788937	1.64347e-06	8.39884e-18	0.0120276	4.27427e-06	L	Lost
chr1	162239279	162239605	47.0997	5.30776	26.2638	2.12209	16.3025	0	162239430	162239372	162239383	+	0.175439	2.05861	-3.20671	-1.1481	4.31242e-12	2.5101e-08	0.0362353	5.55535e-12	1.44733e-07	0.0549309	L	Lost
chr1	162478156	162478597	40.3863	11.9622	21.2501	5.59598	11.8402	0	162478457	0	0	0	0	2.62624	-1.72388	0.902358	7.13581e-14	0.000336033	0.0427907	1.05114e-13	0.00065585	0.0639768	L	Lost
chr1	162581541	162582157	209.987	36.7565	105.013	16.5941	102.888	9.26638	162582010	162581972	162581983	-	16.9298	4.40229	-2.50114	1.90114	8.40626e-44	2.22807e-10	1.15384e-07	1.71734e-42	2.36266e-09	3.3712e-07	L	Lost
chr1	162664400	162665694	741.06	50.5526	375.708	19.4916	231.699	6.82975	162665097	162665408	162665419	+	-0.491228	4.91317	-3.8619	1.05127	9.93817e-79	8.11673e-30	0.000480092	2.90717e-76	1.96732e-26	0.000947755	L	Lost
chr1	162669443	162670205	56.637	73.8063	20.8169	24.8937	19.1489	17.6621	162669707	162669748	162669759	+	5.35088	3.91245	0.386622	4.29907	5.93521e-27	0.298293	5.31021e-32	2.89783e-26	0.340463	2.27802e-30	BS	Book
chr1	162739248	162739657	75.7684	23.9296	37.4818	10.6155	26.7953	0	162739415	162739445	162739456	+	5.57895	2.53612	-1.67068	0.865442	3.12852e-14	0.000142298	0.0255116	4.75734e-14	0.000298836	0.0396812	L	Lost
chr1	162742626	162743101	98.7799	14.472	60.0174	5.40214	56.9542	0	162742806	162742783	162742794	+	13.2456	3.84176	-2.76038	1.08138	3.09982e-37	4.27646e-11	0.0074226	3.61962e-36	5.5985e-10	0.0125359	L	Lost
chr1	162829679	162830197	80.0532	56.8347	27.9493	22.0957	24.1081	9.98165	162829943	162830009	162830020	-	13.9474	2.99685	-0.503461	2.49339	8.98953e-25	0.142001	6.76771e-16	3.59634e-24	0.172905	4.56104e-15	L	Lost
chr1	163070410	163070858	123.777	25.5645	58.7794	10.7048	44.401	3.90365	163070563	163070605	163070616	+	1.73684	3.27994	-2.25214	1.0278	6.57918e-28	1.32352e-08	0.00413745	3.49814e-27	8.28174e-08	0.00725486	L	Lost
chr1	163072156	163073092	285.218	66.1877	141.162	27.5922	164.971	24.8036	163072735	163072756	163072767	-	6.08772	4.09987	-2.10637	1.9935	4.95704e-41	2.35305e-08	1.41593e-09	8.0405e-40	1.36723e-07	4.99551e-09	BA	Book
chr1	163081234	163082331	223.096	70.2431	64.5219	21.7131	84.5197	13.9646	163081857	163081847	163081858	+	18.1053	3.57927	-1.67003	1.90924	2.64928e-41	3.70842e-07	4.31755e-11	4.40893e-40	1.51356e-06	1.77143e-10	BA	Book
chr1	163083043	163083499	59.0798	30.7779	28.7304	12.6382	33.729	8.19248	163083227	163083142	163083153	-	15.1754	4.06855	-0.938017	3.13054	3.69377e-26	0.0267784	4.30351e-14	1.67972e-25	0.0371539	2.3967e-13	L	Lost
chr1	163089828	163091170	339.227	95.5194	139.881	23.3481	119.779	13.1494	163090445	163090438	163090449	+	12.3158	3.27319	-1.82799	1.4452	6.81816e-34	6.70076e-08	5.0459e-07	6.06768e-33	3.40844e-07	1.38005e-06	BA	Book
chr1	163110442	163111222	206.273	59.4286	99.1894	21.6086	75.7574	12.0282	163110962	163110934	163110945	-	11.2632	3.38225	-1.78714	1.59511	1.06625e-28	2.72865e-06	1.27046e-06	6.06047e-28	8.71052e-06	3.33984e-06	BA	Book
chr1	163111312	163112181	124.416	144.065	42.0433	53.2613	31.8448	41.204	163111841	163111837	163111848	-	17.3158	2.82672	0.20925	3.03597	1.93227e-13	0.65183	3.81535e-15	2.7448e-13	0.686784	2.36814e-14	BS	Book
chr1	163177538	163178143	188.247	20.068	107.036	6.46573	109.216	0	163177912	163177823	163177834	-	10.4912	3.98067	-3.223	0.757664	1.54249e-35	1.28301e-13	0.0556252	1.5794e-34	3.43618e-12	0.081345	L	Lost
chr1	163180252	163180999	84.5198	90.2116	22.8929	22.4783	12.6135	15.4557	163180740	163180691	163180702	-	7.7193	2.02562	0.0949895	2.12061	2.36226e-10	0.806681	6.28377e-11	2.74196e-10	0.829136	2.53721e-10	BS	Book
chr1	163184416	163184724	48.7472	9.64632	29.611	5.40214	25.1601	0	163184566	0	0	0	0	3.01704	-2.28745	0.729591	6.23877e-19	2.90675e-06	0.116256	1.45558e-18	9.20352e-06	0.159506	L	Lost
chr1	163200969	163201946	256.178	26.3399	115.821	11.0976	107.458	2.74224	163201399	163201133	163201144	+	12.5614	4.56525	-3.27878	1.28647	3.39749e-60	6.58412e-19	0.000197304	2.54497e-58	7.4473e-17	0.00040816	L	Lost
chr1	163231077	163231557	55.0511	10.4217	25.8401	4.1498	23.1272	0	163231338	163231225	163231236	+	3.36842	3.03032	-2.42761	0.602719	7.49838e-18	1.55537e-06	0.202682	1.5754e-17	5.30916e-06	0.262244	L	Lost
chr1	163372839	163374086	386.593	82.9756	162.092	19.8742	154.997	12.0735	163373283	163373431	163373442	-	6.19298	3.46318	-2.21844	1.24474	7.67085e-52	2.84556e-14	9.35029e-07	2.93786e-50	9.08357e-13	2.49201e-06	BA	Book
chr1	163617816	163618347	31.2491	45.5432	11.2417	22.1008	7.02426	15.7415	163618003	163618202	163618213	-	1.05263	1.49921	0.53776	2.03697	6.44643e-06	0.171991	6.84045e-10	6.55402e-06	0.206072	2.48946e-09	BM	Book
chr1	163680738	163681575	91.1858	36.6621	23.7356	8.39397	14.2063	0	163680922	163680925	163680936	-	14.0877	2.03154	-1.3059	0.725633	3.65137e-15	0.00013024	0.0152471	6.01378e-15	0.000275594	0.0245717	L	Lost
chr1	163723401	163723831	29.9636	51.1443	14.9794	22.1008	7.67866	13.5644	163723610	163723637	163723648	+	13.614	1.76564	0.755998	2.52164	1.99863e-07	0.0531569	2.87566e-14	2.07959e-07	0.0700522	1.62714e-13	BM	Book
chr1	163848746	163849323	136.5	37.2487	63.2412	15.4412	54.499	5.21449	163848882	163849158	163849169	+	16.7193	3.1193	-1.88862	1.23068	1.98883e-20	1.09899e-05	0.000982163	5.33704e-20	2.98454e-05	0.00186626	L	Lost
chr1	163850814	163851486	60.332	12.2505	25.3974	3.76211	21.0232	0	163851123	163851312	163851323	-	3.22807	2.45167	-2.25321	0.198456	1.04949e-12	4.53386e-06	0.655359	1.41051e-12	1.36329e-05	0.71741	L	Lost
chr1	163888094	163888483	53.7514	19.3921	24.1689	9.64632	10.1077	3.51997	163888309	163888335	163888346	-	6.50877	2.16982	-1.45928	0.710542	5.10187e-11	0.000963547	0.0699955	6.14299e-11	0.00172675	0.100481	L	Lost
chr1	163898992	163900092	104.527	96.6774	29.1683	23.6363	19.9257	13.9904	163899721	163899078	163899089	-	4.92982	2.16091	-0.112295	2.04861	2.12091e-17	0.715609	5.98786e-15	4.27444e-17	0.746404	3.64068e-14	BS	Book
chr1	163904192	163904504	32.1108	33.1882	20.8643	18.91	16.9429	9.11653	163904338	163904340	163904351	-	6.01754	1.76997	0.0591508	1.82912	5.73308e-08	0.880277	6.8508e-08	6.04953e-08	0.895209	2.04134e-07	L	Lost
chr1	163906436	163906799	77.9725	27.3091	41.267	14.3776	26.6659	3.26375	163906621	163906644	163906655	+	6.59649	2.2317	-1.53371	0.697989	5.00478e-13	0.000175831	0.0514989	6.90129e-13	0.000362372	0.0757876	L	Lost
chr1	164042116	164042987	57.8892	60.4029	19.1599	20.0731	11.2978	9.90142	164042515	164042468	164042479	+	16.9298	2.08464	0.0552976	2.13994	3.44364e-13	0.871465	3.9679e-13	4.80284e-13	0.887737	2.00391e-12	L	Lost
chr1	164343786	164344211	49.2231	30.0076	25.4638	12.7376	27.7042	7.09427	164343982	164343937	164343948	+	15.1754	2.56909	-0.717398	1.8517	2.9118e-15	0.0717026	2.28226e-07	4.8323e-15	0.0921658	6.4543e-07	L	Lost
chr1	164576282	164576677	52.9609	16.4997	25.0353	7.14163	17.7844	0	164576534	164576525	164576536	+	0.649123	1.93938	-1.69046	0.248926	1.4941e-08	0.00033969	0.549886	1.60208e-08	0.000662339	0.622131	L	Lost
chr1	164762286	164762679	73.7209	10.2278	42.905	6.65957	31.7562	0	164762486	164762525	164762536	-	5.66667	2.69435	-2.85998	-0.165628	4.04346e-21	4.4097e-10	0.700985	1.15632e-20	4.31098e-09	0.757212	L	Lost
chr1	164769066	164769718	56.6227	46.1248	22.9024	15.9233	24.6545	6.76662	164769359	164769321	164769332	+	17.8772	2.18397	-0.308755	1.87522	3.24665e-13	0.396925	3.42337e-09	4.53685e-13	0.441269	1.15991e-08	L	Lost
chr1	164825752	164826735	34.1868	131.511	17.1029	35.4991	12.6657	34.8113	164826181	164826142	164826153	-	9.01754	1.47238	1.9433	3.41568	1.83906e-06	1.65825e-08	5.65483e-34	1.88086e-06	1.00841e-07	3.11502e-32	BM	Book
chr1	165039170	165040121	77.8681	116.761	24.5736	32.0404	20.9626	23.4388	165039711	165039690	165039701	+	16.9298	2.83196	0.578479	3.41044	1.03302e-18	0.116515	1.29079e-26	2.35908e-18	0.144074	2.90068e-25	BS	Book
chr1	165052544	165052949	108.708	10.2278	62.0602	5.59598	68.7147	0	165052734	165052647	165052658	+	7.70175	4.05504	-3.42005	0.634984	4.16467e-40	1.24288e-13	0.157535	6.23653e-39	3.33705e-12	0.209616	L	Lost
chr1	165093593	165094038	72.9018	9.64632	40.41	4.72624	24.467	0	165093923	165093946	165093957	-	2.03509	2.6323	-2.8674	-0.235097	3.41035e-18	1.91669e-09	0.597205	7.4006e-18	1.53611e-08	0.666084	L	Lost
chr1	165239452	165240284	93.2903	41.8755	27.8971	12.2505	17.5915	5.57235	165239771	165240013	165240024	+	2.35088	2.36894	-1.15888	1.21006	1.08421e-17	0.00104156	9.19328e-05	2.24427e-17	0.00185374	0.000197992	L	Lost
chr1	165558191	165558601	39.991	4.1498	23.3261	2.12209	19.1489	0	165558503	165558505	165558516	-	2.80702	4.41929	-3.33186	1.08742	1.88277e-24	3.57715e-07	0.10966	7.31486e-24	1.46722e-06	0.151326	L	Lost
chr1	165821049	165821411	30.3968	56.3526	18.7267	32.1348	18.0296	25.2447	165821251	165821287	165821298	+	11.9649	3.25417	0.884668	4.13883	1.03473e-12	0.0700298	2.89332e-20	1.39122e-12	0.0901796	3.13872e-19	BS	Book
chr1	165932040	165932301	35.0058	5.30776	20.8216	2.99183	10.2225	0	165932147	165932071	165932082	-	0.561404	2.16103	-2.77671	-0.615681	1.60538e-10	3.29568e-06	0.276358	1.88106e-10	1.02749e-05	0.345312	L	Lost
chr1	165948391	165948854	163.64	30.2015	109.927	13.6023	95.1449	6.67345	165948546	165948537	165948548	-	9.36842	3.61359	-2.44343	1.17016	1.2108e-22	2.44763e-07	0.00460789	3.98275e-22	1.05187e-06	0.00801967	L	Lost
chr1	165949635	165950225	140.762	17.0762	71.6354	6.65449	75.3769	0	165950070	165950026	165950037	+	9.73684	3.97465	-3.02833	0.946322	3.64674e-29	1.94057e-10	0.0292689	2.16488e-28	2.08715e-09	0.0450647	L	Lost
[truncated: 32,006 more rows]

## Sheet: POU5F1
Peaks and bookmarking calls for POU5F1
[truncated: 16,442 more rows]

## Sheet: SOX2
Peaks and bookmarking calls for SOX2
[truncated: 26,369 more rows]

[truncated: 1 more sheets: NANOG]
