# Supplementary material for: Transcription factor activity and nucleosome organization in mitosis
Source: HighWire-hosted journal article supplement (doi:10.1101/gr.243048.118), 2019-01-17
Supplement: Supplemental_Table_S3.xlsx [file Supplemental_Table_S3.xlsx]

## Sheet: Sox2-AID RNAseq
Differential expression of genes responsive to SOX2 depletion in EG1.
Gene	EG1_p_1	EG1_p_2	EG1_p_3	EG1_m_1	EG1_m_2	EG1_m_3	log2FoldChange_EG1_pm	pvalue_EG1_pm	padj_EG1_pm	PM_EG1
ENSMUSG00000000001_Gnai3	6339.72	5476.3	6443.35	5884.12	5441.82	5178.08	-0.145722	0.14515	0.911908	-
ENSMUSG00000000028_Cdc45	1261.1	1277.02	1188.46	1234.46	1254.41	929.372	-0.124286	0.257192	0.911908	-
ENSMUSG00000000031_H19	257.624	145.03	110.228	277.009	114.862	82.9065	-0.110999	0.839618	0.9853	-
ENSMUSG00000000037_Scml2	579.204	457.692	496.027	525.202	350.63	452.404	-0.206371	0.225004	0.911908	-
ENSMUSG00000000056_Narf	813.408	638.509	682.413	776.184	716.373	632.546	-0.00621563	0.967092	0.998702	-
ENSMUSG00000000058_Cav2	15.3133	15.0681	13.027	6.50693	9.06801	12.2824	-0.648765	0.203933	0.911908	-
ENSMUSG00000000078_Klf6	1513.32	1389.09	1815.76	1535.64	1429.72	1861.81	0.033042	0.829368	0.9853	-
ENSMUSG00000000085_Scmh1	26.1227	48.0294	46.0955	68.7875	47.3552	66.5299	0.609501	0.0263128	0.732356	-
ENSMUSG00000000088_Cox5a	3058.16	3018.32	3131.49	3073.13	2988.41	2500.5	-0.10469	0.271904	0.911908	-
ENSMUSG00000000094_Tbx4	18.9165	22.6021	26.054	28.8164	25.1889	18.4237	0.108239	0.757826	0.978037	-
ENSMUSG00000000120_Ngfr	902.586	941.754	908.882	516.836	556.172	485.157	-0.821185	1.25388e-16	1.8985e-12	R
ENSMUSG00000000125_Wnt3	12.611	18.8351	6.01245	5.57737	9.06801	8.1883	-0.726582	0.17928	0.911908	-
ENSMUSG00000000126_Wnt9a	29.7259	16.0098	12.0249	13.9434	13.0982	13.306	-0.525552	0.234037	0.911908	-
ENSMUSG00000000127_Fer	754.857	630.033	687.424	669.284	602.519	679.629	-0.0868781	0.468144	0.928865	-
ENSMUSG00000000131_Xpo6	2082.61	2565.34	2128.41	2283.93	2680.1	2636.63	0.165499	0.235489	0.911908	-
ENSMUSG00000000134_Tfe3	628.747	792.957	618.281	808.718	873.552	770.724	0.2659	0.100462	0.911908	-
ENSMUSG00000000142_Axin2	85.5745	127.137	77.1598	101.322	123.93	76.7653	0.058888	0.819682	0.984897	-
ENSMUSG00000000148_Baat1	420.666	401.187	409.849	412.725	387.909	470.827	0.0455155	0.771102	0.979776	-
ENSMUSG00000000149_Gna12	1107.06	1122.57	1125.33	988.124	1006.55	1012.28	-0.158033	0.108553	0.911908	-
ENSMUSG00000000154_Slc22a18	36.9321	32.9614	60.1245	27.8868	14.1058	35.8238	-0.737093	0.0496748	0.843192	-
ENSMUSG00000000167_Pih1d2	54.9478	74.3985	52.1079	65.0693	61.461	74.7182	0.147786	0.533529	0.941169	-
ENSMUSG00000000168_Dlat	2599.66	2272.45	2479.13	2498.66	2317.38	2180.13	-0.0712341	0.407886	0.918958	-
ENSMUSG00000000171_Sdhd	3446.4	2727.32	3174.57	3115.89	2690.18	2452.4	-0.178729	0.227991	0.911908	-
ENSMUSG00000000184_Ccnd2	75.6659	117.719	61.1266	99.4631	157.179	37.8709	0.210483	0.635937	0.962307	-
ENSMUSG00000000194_Gpr107	1836.7	1946.61	1860.85	1839.6	1904.28	2157.62	0.064076	0.489475	0.935357	-
ENSMUSG00000000202_Btbd17	116.201	97.0006	148.307	76.224	59.4459	117.707	-0.512901	0.164881	0.911908	-
ENSMUSG00000000223_Drp2	47.7416	56.5052	29.0602	49.2667	44.3325	31.7297	-0.0900428	0.748682	0.975268	-
ENSMUSG00000000244_Tspan32	94.5823	48.0294	52.1079	76.224	45.3401	45.0356	-0.224408	0.457225	0.926853	-
ENSMUSG00000000253_Gmpr	202.676	148.797	187.388	171.969	142.066	169.907	-0.154866	0.402074	0.918958	-
ENSMUSG00000000275_Trim25	5127.26	6259.84	5400.18	5585.73	6349.63	6199.57	0.111362	0.340457	0.91642	-
ENSMUSG00000000276_Dgke	2389.78	2317.66	2632.45	2470.77	2392.95	3080.85	0.114186	0.408231	0.918958	-
ENSMUSG00000000278_Scpep1	2696.95	2626.55	2840.88	2670.63	2460.45	2490.27	-0.0988372	0.1212	0.911908	-
ENSMUSG00000000282_Mnt	290.953	385.177	303.629	344.867	382.872	501.533	0.326661	0.101661	0.911908	-
ENSMUSG00000000295_Hddc2	517.05	370.109	465.965	404.359	407.053	411.462	-0.146315	0.35094	0.91642	-
ENSMUSG00000000296_Tpd52l1	227.898	206.244	293.608	263.995	242.821	249.743	0.0586213	0.676652	0.96667	-
ENSMUSG00000000301_Pemt	51.3447	44.2624	37.0768	42.7598	40.3023	59.3652	0.0971202	0.731823	0.972631	-
ENSMUSG00000000303_Cdh1	6710.84	7687.54	7644.83	6470.68	6962.22	8199.56	-0.0271634	0.825044	0.9853	-
ENSMUSG00000000305_Cdh4	33.329	59.3305	47.0975	48.3372	54.4081	51.1769	0.140076	0.716723	0.971295	-
ENSMUSG00000000308_Ckmt1	615.235	576.353	789.635	563.314	564.232	689.864	-0.12423	0.412241	0.920917	-
ENSMUSG00000000317_Bcl6b	95.4831	126.195	89.1847	102.252	124.937	98.2596	0.0647574	0.73461	0.972815	-
ENSMUSG00000000320_Alox12	49.5431	46.1459	47.0975	59.4919	55.4156	61.4122	0.303995	0.296555	0.911908	-
ENSMUSG00000000325_Arvcf	1459.27	1447.48	1278.65	1328.34	1271.54	1129.99	-0.166217	0.151884	0.911908	-
ENSMUSG00000000326_Comt	281.945	260.866	220.457	271.432	219.647	211.872	-0.118489	0.423736	0.924187	-
ENSMUSG00000000339_Rtcd1	773.773	751.52	795.648	738.072	758.691	647.899	-0.113447	0.259935	0.911908	-
ENSMUSG00000000340_Dbt	967.442	924.802	932.932	916.547	920.907	962.125	-0.0135185	0.867565	0.987167	-
ENSMUSG00000000346_Dazap2	510.745	550.926	562.164	486.161	549.119	413.509	-0.163605	0.103354	0.911908	-
ENSMUSG00000000355_Mcts1	350.405	318.313	418.868	353.233	348.615	337.767	-0.0641033	0.679509	0.967818	-
ENSMUSG00000000365_Rnf17	1563.76	1468.19	1755.64	1454.76	1416.63	1626.4	-0.0900031	0.468718	0.929029	-
ENSMUSG00000000374_Trappc10	1082.74	961.531	875.814	1137.78	956.172	931.419	0.0511171	0.611175	0.95795	-
ENSMUSG00000000378_Ccm2	535.066	562.227	534.106	592.131	493.703	427.839	-0.106862	0.414514	0.921745	-
ENSMUSG00000000384_Tbrg4	1596.19	1682.91	1413.93	1663.91	1852.9	1635.61	0.134369	0.169428	0.911908	-
ENSMUSG00000000399_Ndufa9	3786	3175.59	3695.65	3462.62	3163.73	2707.26	-0.191217	0.181409	0.911908	-
ENSMUSG00000000409_Lck	201.776	190.234	138.286	184.983	193.451	131.013	-0.058532	0.783695	0.981434	-
ENSMUSG00000000416_Cttnbp2	7.20627	19.7768	19.0394	8.36605	12.0907	22.5178	-0.099969	0.848113	0.9853	-
ENSMUSG00000000420_Galnt1	1923.17	1855.25	2139.43	1972.53	1771.29	1909.92	-0.0654559	0.461986	0.927736	-
ENSMUSG00000000439_Mkrn2	839.531	798.607	815.689	845.901	847.356	764.582	0.00252846	0.98082	0.999082	-
ENSMUSG00000000441_Raf1	3451.8	3500.5	3430.1	3450.53	3472.04	3402.24	-0.00802935	0.85678	0.985753	-
ENSMUSG00000000486_Sept1	745.849	633.8	542.123	765.959	735.517	564.993	0.10461	0.62263	0.95992	-
ENSMUSG00000000489_Pdgfb	192.768	322.08	368.764	109.688	125.945	191.401	-1.04949	0.000425059	0.0990126	-
ENSMUSG00000000530_Acvrl1	72.9635	73.4568	83.1723	67.858	57.4308	79.8359	-0.16204	0.511843	0.937633	-
ENSMUSG00000000531_Grasp	586.41	580.12	610.264	547.512	516.877	446.262	-0.233079	0.0443666	0.824238	-
ENSMUSG00000000532_Acvr1b	633.251	676.179	618.281	645.116	620.655	625.381	-0.0275867	0.773517	0.980808	-
ENSMUSG00000000538_Tom1l2	245.013	251.448	261.542	237.968	241.814	249.743	-0.0551011	0.709535	0.97056	-
ENSMUSG00000000544_Gpa33	215.287	209.069	217.45	222.165	232.746	240.531	0.115402	0.447758	0.926853	-
ENSMUSG00000000552_Zfp385a	22.5196	76.2821	47.0975	51.1259	74.5592	66.5299	0.398583	0.24448	0.911908	-
ENSMUSG00000000555_Itga5	1288.12	1552.95	1490.09	1271.64	1447.86	1952.91	0.10927	0.555506	0.943412	-
ENSMUSG00000000561_Wdr77	8023.28	7924.86	8390.38	7895.69	7535.52	7944.7	-0.0581575	0.380293	0.91642	-
ENSMUSG00000000563_Atp5f1	10267.1	8484.26	9338.34	9258.43	8452.4	7318.29	-0.166411	0.262631	0.911908	-
ENSMUSG00000000568_Hnrnpd	1823.19	1973.92	1941.02	2157.51	2369.77	2107.46	0.209553	0.0120596	0.57703	-
ENSMUSG00000000579_Dynlt1c	1024.19	1010.5	1220.53	1026.24	855.416	1207.77	-0.0752356	0.616993	0.959284	-
ENSMUSG00000000581_C1d	1353.88	1065.12	1312.72	1175.9	1041.81	924.254	-0.247913	0.132279	0.911908	-
ENSMUSG00000000594_Gm2a	267.533	297.594	396.822	233.32	256.927	330.603	-0.228532	0.176971	0.911908	-
ENSMUSG00000000600_Krit1	1428.64	1488.91	1444.99	1315.33	1377.33	1367.45	-0.103811	0.193617	0.911908	-
ENSMUSG00000000605_Clcn4-2	286.449	205.302	327.679	242.615	223.678	280.449	-0.133503	0.421572	0.923997	-
ENSMUSG00000000627_Sema4f	43.2376	28.2526	30.0623	35.3233	25.1889	16.3766	-0.397635	0.273333	0.911908	-
ENSMUSG00000000628_Hk2	10102.3	11095.7	10110.9	11244.9	12661	10333.6	0.129084	0.185771	0.911908	-
ENSMUSG00000000631_Myo18a	2242.05	2663.28	2847.9	2317.4	2571.29	3092.11	0.0417283	0.814672	0.98426	-
ENSMUSG00000000632_Sez6	8.10706	11.301	11.0228	13.9434	13.0982	16.3766	0.514203	0.432493	0.925726	-
ENSMUSG00000000682_Cd52	5.4047	12.2428	10.0208	7.43649	11.0831	9.21184	0.00502735	0.992811	0.999082	-
ENSMUSG00000000686_Abhd15	20.718	18.8351	20.0415	21.3799	24.1814	18.4237	0.102673	0.839773	0.9853	-
ENSMUSG00000000693_Loxl3	105.392	95.1171	104.216	79.9423	87.6575	84.9536	-0.271728	0.169028	0.911908	-
ENSMUSG00000000708_Kat2b	1116.07	1032.16	963.997	1118.26	1062.97	901.736	-0.0135164	0.885182	0.989266	-
ENSMUSG00000000711_Rab5b	956.633	997.317	1133.35	952.8	901.764	946.772	-0.139346	0.114077	0.911908	-
ENSMUSG00000000730_Dnmt3l	2517.69	2200.88	2020.18	2228.16	2013.1	1894.57	-0.135259	0.313142	0.91479	-
ENSMUSG00000000731_Aire	74.7651	54.6217	65.1349	68.7875	58.4383	113.613	0.306192	0.353789	0.91642	-
ENSMUSG00000000732_Icosl	172.05	165.749	140.291	149.659	183.375	252.814	0.291592	0.283868	0.911908	-
ENSMUSG00000000738_Spg7	1142.19	1118.8	986.042	1167.53	1060.96	1082.9	0.028067	0.742298	0.97364	-
ENSMUSG00000000739_Sult5a1	30.6267	38.6119	45.0934	23.239	38.2872	54.2475	0.0148602	0.962274	0.998033	-
ENSMUSG00000000740_Rpl13	33429	28025.7	30624.4	32718.7	28664	25555.7	-0.0828685	0.520758	0.939947	-
ENSMUSG00000000743_Chmp1a	2495.17	2184.87	2563.31	2317.4	2084.64	2238.48	-0.125138	0.149514	0.911908	-
ENSMUSG00000000751_Rpa1	8963.7	7873.06	8002.57	8350.25	7734.01	6204.68	-0.156262	0.24693	0.911908	-
ENSMUSG00000000753_Serpinf1	18.0157	12.2428	10.0208	7.43649	6.04534	10.2354	-0.769388	0.244608	0.911908	-
ENSMUSG00000000759_Tubgcp3	1129.58	1064.18	962.994	969.532	1058.94	1001.02	-0.0603018	0.490359	0.935636	-
ENSMUSG00000000776_Polr3d	1048.51	1061.36	997.065	1115.47	1030.73	1189.35	0.10206	0.189168	0.911908	-
ENSMUSG00000000782_Tcf7	181.058	216.603	230.477	185.912	178.338	245.649	-0.0424103	0.841011	0.9853	-
ENSMUSG00000000787_Ddx3x	23130.3	21956	26104.1	21867.9	21978.9	21128.9	-0.131763	0.2098	0.911908	-
ENSMUSG00000000791_Il12rb1	10.8094	4.70877	16.0332	12.0843	6.04534	13.306	0.0024565	0.99649	0.999082	-
ENSMUSG00000000792_Slc5a5	28.8251	44.2624	23.0477	24.1686	26.1965	34.8003	-0.178496	0.662558	0.966181	-
ENSMUSG00000000804_Usp32	1425.94	1462.54	1430.96	1475.21	1450.88	1650.97	0.0832482	0.247607	0.911908	-
ENSMUSG00000000805_Car4	46.8408	51.7965	19.0394	41.8303	40.3023	16.3766	-0.256783	0.630064	0.961458	-
ENSMUSG00000000811_Txnrd3	223.394	232.613	245.508	203.574	223.678	231.319	-0.0915456	0.432304	0.925726	-
ENSMUSG00000000823_Znf512b	894.479	950.23	856.774	981.617	1011.59	1299.89	0.285359	0.0782909	0.911908	-
ENSMUSG00000000826_Dnajc5	4154.42	4589.17	4803.95	3910.66	4336.53	4466.72	-0.0916264	0.274055	0.911908	-
ENSMUSG00000000827_Tpd52l2	3986.87	3540.99	3938.16	3436.59	3296.73	3479	-0.167045	0.0923562	0.911908	-
ENSMUSG00000000838_Fmr1	2302.4	2436.32	2619.43	2551.65	2438.29	2451.37	0.0166207	0.830452	0.9853	-
ENSMUSG00000000861_Bcl11a	64.8565	66.8645	36.0747	66.9284	60.4534	31.7297	-0.0766577	0.844014	0.9853	-
ENSMUSG00000000876_Pxmp4	115.3	112.069	115.239	118.984	115.869	100.307	-0.0304696	0.866209	0.986981	-
ENSMUSG00000000881_Dlg3	427.872	383.294	367.762	428.528	364.736	277.379	-0.138143	0.397249	0.918612	-
ENSMUSG00000000884_Gnb1l	154.034	136.554	153.318	122.702	132.998	121.801	-0.234017	0.121553	0.911908	-
ENSMUSG00000000901_Mmp11	339.596	510.431	383.795	464.781	489.673	547.593	0.283658	0.112948	0.911908	-
ENSMUSG00000000902_Smarcb1	2319.52	2412.77	1912.96	2276.5	2323.43	1867.96	-0.0390996	0.753584	0.976635	-
ENSMUSG00000000903_Vpreb3	19.8172	21.6603	14.0291	9.29561	29.2192	9.21184	-0.225432	0.635923	0.962307	-
ENSMUSG00000000915_Hip1r	167.546	219.429	239.496	176.617	217.632	270.214	0.0848102	0.643086	0.963802	-
ENSMUSG00000000916_Nsun5	862.951	818.384	772.6	898.886	817.129	870.007	0.0753737	0.394186	0.917269	-
ENSMUSG00000000934_Top1mt	145.927	110.185	174.361	158.955	140.05	117.707	-0.0431958	0.812772	0.98426	-
ENSMUSG00000000948_Snrpn	1115.17	984.133	951.972	1176.82	1128.46	910.948	0.0760251	0.567242	0.947238	-
ENSMUSG00000000957_Mmp14	293.656	316.429	288.598	269.573	383.879	293.755	0.0749285	0.645978	0.964382	-
ENSMUSG00000000958_Slc7a7	784.583	920.093	723.498	849.619	839.295	800.406	0.0356899	0.742726	0.97364	-
ENSMUSG00000000959_Oxa1l	396.345	511.372	402.834	430.387	483.627	405.321	0.0095524	0.949675	0.995993	-
ENSMUSG00000000976_Heatr6	793.591	934.22	749.552	823.591	969.27	946.772	0.14464	0.269757	0.911908	-
ENSMUSG00000001016_Ilf2	5741.6	5160.81	5120.61	5287.34	4749.62	4208.79	-0.169562	0.174681	0.911908	-
ENSMUSG00000001017_2500003M10Rik	4205.76	4154.08	4268.84	3981.31	4114.86	3568.05	-0.114498	0.138358	0.911908	-
ENSMUSG00000001018_Snapin	561.188	547.159	509.054	564.244	600.504	502.557	0.0434729	0.629243	0.961458	-
ENSMUSG00000001025_S100a6	256.723	240.147	383.795	173.828	195.466	200.613	-0.627266	0.00463975	0.393687	-
ENSMUSG00000001027_Scn4a	9.00784	10.3593	17.0353	13.9434	7.0529	9.21184	-0.253947	0.621903	0.95992	-
ENSMUSG00000001034_Mapk7	933.212	1130.1	967.003	957.448	1009.57	1129.99	0.0311449	0.808094	0.98406	-
ENSMUSG00000001036_Epn2	766.567	893.724	700.451	844.971	916.877	822.924	0.130472	0.307173	0.91276	-
ENSMUSG00000001039_B9d1	465.705	420.022	443.919	442.471	403.023	389.968	-0.105471	0.383598	0.91642	-
ENSMUSG00000001052_Sec24b	602.625	633.8	611.266	659.989	633.753	856.701	0.218498	0.122129	0.911908	-
ENSMUSG00000001053_N4bp3	2378.97	2495.65	2533.25	2164.95	2221.66	2226.19	-0.163728	0.0270877	0.741654	-
ENSMUSG00000001054_Rmnd5b	880.967	1001.08	773.602	970.462	978.338	818.83	0.0594873	0.60978	0.957261	-
ENSMUSG00000001056_Nhp2	5708.27	5901.03	5807.03	5675.9	5502.27	4762.52	-0.127633	0.207247	0.911908	-
ENSMUSG00000001062_1300018I17Rik	136.919	187.409	120.249	136.646	176.322	247.696	0.332815	0.206644	0.911908	-
ENSMUSG00000001065_Zfp276	409.857	395.537	362.751	329.065	338.539	420.674	-0.103158	0.545806	0.942192	-
ENSMUSG00000001082_Mfsd10	656.672	727.976	618.281	608.863	696.222	863.866	0.114386	0.546791	0.942317	-
ENSMUSG00000001089_Luzp1	3495.04	4571.27	4052.39	3780.53	4547.11	4314.21	0.060953	0.679269	0.9678	-
ENSMUSG00000001098_Kctd10	1430.45	1421.11	1546.2	1381.33	1339.04	1295.8	-0.130256	0.065453	0.884404	-
ENSMUSG00000001100_Poldip2	2000.64	1926.83	1948.03	2016.22	1963.73	1885.36	-0.0023482	0.969843	0.999082	-
ENSMUSG00000001103_Sebox	17.1149	23.5438	13.027	32.5346	22.1663	33.7767	0.718491	0.0617237	0.869332	-
ENSMUSG00000001105_Ift20	1019.69	869.239	1070.22	980.687	793.955	906.854	-0.141515	0.21047	0.911908	-
ENSMUSG00000001120_Pcbp3	129.713	172.341	140.291	135.716	159.194	157.625	0.0318999	0.852968	0.9853	-
ENSMUSG00000001123_Lgals9	18.9165	13.1846	6.01245	6.50693	11.0831	5.11769	-0.758996	0.16587	0.911908	-
ENSMUSG00000001127_Araf	1037.7	986.958	1098.27	923.054	1047.86	1281.47	0.0581189	0.625546	0.960796	-
ENSMUSG00000001128_Cfp	45.94	48.0294	54.1121	50.1963	42.3174	56.2946	0.00797234	0.980943	0.999082	-
ENSMUSG00000001131_Timp1	133.316	160.098	166.345	139.434	170.277	141.248	-0.0268124	0.861753	0.986568	-
ENSMUSG00000001134_Uxt	258.525	243.914	240.498	224.954	252.897	230.296	-0.070101	0.627309	0.960994	-
ENSMUSG00000001138_Cnnm3	604.426	695.014	598.239	662.777	769.774	823.948	0.249321	0.0860102	0.911908	-
ENSMUSG00000001143_Lman2l	190.065	210.011	221.459	233.32	232.746	389.968	0.461245	0.0229771	0.700331	-
ENSMUSG00000001150_Mcm3ap	5366.87	4338.66	3696.66	5358.92	4583.38	3979.51	0.054854	0.74868	0.975268	-
ENSMUSG00000001151_Pcnt	5017.37	5463.11	4097.49	5378.44	6021.16	5324.44	0.19801	0.0930625	0.911908	-
ENSMUSG00000001156_Mxd1	184.661	242.972	164.34	192.419	196.474	164.79	-0.0967188	0.568011	0.947895	-
ENSMUSG00000001157_Gmcl1	1095.35	984.133	908.882	939.786	989.421	818.83	-0.12116	0.361885	0.91642	-
ENSMUSG00000001158_Snrnp27	797.194	723.267	775.606	740.86	756.675	676.558	-0.0786251	0.507257	0.937592	-
ENSMUSG00000001166_Oas1c	21.6188	23.5438	38.0789	25.0982	20.1511	22.5178	-0.28952	0.446694	0.926853	-
ENSMUSG00000001173_Ocrl	435.979	534.916	564.168	552.159	542.066	534.287	0.0861326	0.546905	0.942317	-
ENSMUSG00000001175_Calm1	8130.48	6866.33	7201.92	7537.81	6703.28	5926.28	-0.138423	0.328316	0.91642	-
ENSMUSG00000001211_Agpat3	527.859	515.139	599.241	601.426	558.187	612.075	0.110144	0.354034	0.91642	-
ENSMUSG00000001227_Sema6b	33.329	37.6702	28.0581	40.9007	37.2796	17.4001	-0.0480693	0.889641	0.989266	-
ENSMUSG00000001228_Uhrf1	9569.93	10510.9	8253.09	9353.25	10266	7980.52	-0.0378916	0.786946	0.98147	-
ENSMUSG00000001229_Dpp9	743.147	920.093	629.303	747.367	974.308	738.994	0.101719	0.575685	0.948526	-
ENSMUSG00000001240_Ramp2	24.3212	42.3789	23.0477	35.3233	16.1209	24.5649	-0.235473	0.553358	0.943026	-
ENSMUSG00000001247_Lsr	358.512	371.993	445.924	383.909	321.411	453.427	-0.0212557	0.892062	0.989538	-
ENSMUSG00000001248_Gramd1a	618.839	770.355	639.324	610.722	613.602	585.463	-0.164504	0.218389	0.911908	-
ENSMUSG00000001249_Hpn	26.1227	23.5438	63.1308	27.8868	17.1285	54.2475	-0.182845	0.748769	0.975268	-
ENSMUSG00000001270_Ckb	13328.9	13430.4	14392.8	12052.7	12145.1	12185.2	-0.177644	0.00122865	0.187909	-
ENSMUSG00000001280_Sp1	4250.8	4608	4791.92	4567.86	4837.28	4762.52	0.0536771	0.575863	0.948526	-
ENSMUSG00000001281_Itgb7	478.316	393.653	439.911	409.007	377.834	409.415	-0.133344	0.22757	0.911908	-
ENSMUSG00000001285_Myg1	1007.98	990.725	1069.21	972.321	1001.51	858.748	-0.114586	0.218552	0.911908	-
ENSMUSG00000001288_Rarg	1567.36	1954.14	1370.84	1713.18	1853.91	1397.13	0.0210028	0.905052	0.990774	-
ENSMUSG00000001289_Pfdn5	1736.71	1572.73	1725.57	1572.82	1480.1	1302.96	-0.208818	0.119642	0.911908	-
ENSMUSG00000001300_Efnb2	340.496	421.906	208.432	338.36	406.046	286.59	0.0861389	0.754135	0.976895	-
ENSMUSG00000001305_Rrp15	3978.76	3291.43	3653.57	3762.86	3340.05	3152.5	-0.0910002	0.4298	0.925502	-
ENSMUSG00000001313_Rnd2	173.851	162.923	156.324	168.251	175.315	131.013	-0.0548322	0.733044	0.972693	-
ENSMUSG00000001323_Srr	199.073	176.108	217.45	209.151	238.791	253.837	0.243672	0.230819	0.911908	-
ENSMUSG00000001333_Sync	59.4517	70.6315	78.1619	77.1536	66.4988	90.0713	0.167715	0.563711	0.946403	-
ENSMUSG00000001334_Fndc5	42.3368	39.5537	22.0457	26.0277	43.325	33.7767	-0.0167871	0.967828	0.998702	-
ENSMUSG00000001348_Acp5	69.3604	64.981	45.0934	57.6328	53.4005	64.4829	-0.0358655	0.89012	0.989344	-
ENSMUSG00000001349_Cnn1	27.0235	32.0196	20.0415	20.4503	16.1209	27.6355	-0.305657	0.395398	0.917359	-
ENSMUSG00000001366_Fbxo9	492.729	432.265	472.98	459.203	385.894	397.133	-0.169551	0.160074	0.911908	-
ENSMUSG00000001376_Ccdc132	2886.11	2383.58	2498.17	2767.3	2507.81	2448.3	-0.00828319	0.936453	0.995612	-
ENSMUSG00000001379_Apbb3	222.494	247.681	293.608	255.629	235.768	420.674	0.255923	0.280426	0.911908	-
ENSMUSG00000001380_Hars	3058.16	2840.33	2632.45	2874.2	2771.79	2255.88	-0.110465	0.33399	0.91642	-
ENSMUSG00000001383_Zmat2	2001.54	2026.65	1816.76	1936.28	1968.77	1466.73	-0.121717	0.403054	0.918958	-
ENSMUSG00000001403_Ube2c	472.011	776.005	472.98	577.258	873.552	465.71	0.155124	0.523121	0.939947	-
ENSMUSG00000001415_Smg5	4097.67	4301.93	4147.59	3998.97	4276.07	4360.27	0.0100107	0.90864	0.990965	-
ENSMUSG00000001416_Cct3	20768.5	17696.5	18020.3	18843.1	17662.5	15353.1	-0.123284	0.354025	0.91642	-
ENSMUSG00000001417_Rhbg	37.8329	41.4372	53.11	47.4076	42.3174	46.0592	0.0405099	0.888691	0.989266	-
ENSMUSG00000001418_0610031J06Rik	781.881	901.258	851.764	778.043	834.257	803.477	-0.0693565	0.438304	0.925726	-
ENSMUSG00000001419_Mef2d	371.123	500.071	484.002	386.697	425.189	553.734	0.0109323	0.957242	0.996944	-
ENSMUSG00000001420_Tmem79	243.212	294.769	329.683	252.841	213.602	279.426	-0.216823	0.162902	0.911908	-
ENSMUSG00000001424_Snd1	5061.51	4970.58	4570.47	4876.48	4993.45	5378.69	0.0621705	0.348303	0.91642	-
ENSMUSG00000001435_Col18a1	8723.19	8817.64	8104.79	9803.15	8775.82	10927.3	0.202276	0.0813852	0.911908	-
ENSMUSG00000001436_Slc19a1	249.517	255.215	213.442	277.009	305.29	293.755	0.285591	0.0957019	0.911908	-
ENSMUSG00000001440_Kpnb1	26313.7	26787.2	24382.5	25232.9	26566.3	22284.5	-0.0647353	0.453618	0.926853	-
ENSMUSG00000001441_Npepps	2826.66	2497.53	2597.38	3270.2	2812.09	3269.18	0.239357	0.00277959	0.311746	-
ENSMUSG00000001445_Mrpl10	1387.21	1328.81	1189.46	1452.9	1436.78	1091.09	0.0276114	0.832233	0.9853	-
ENSMUSG00000001467_Cyp51	2115.04	2114.24	2639.47	2024.58	2119.9	2484.13	-0.0512488	0.629921	0.961458	-
ENSMUSG00000001472_Tcf25	2501.48	2525.78	2529.24	2452.18	2481.61	2401.22	-0.0428305	0.449436	0.926853	-
ENSMUSG00000001473_Tubb6	1775.45	1977.68	1708.54	1756.87	1770.28	1401.22	-0.148043	0.16745	0.911908	-
ENSMUSG00000001482_Def8	1007.08	1052.88	874.812	981.617	1097.23	932.443	0.0368207	0.782134	0.981434	-
ENSMUSG00000001493_Meox1	60.3525	90.4084	43.0892	39.0416	50.3779	35.8238	-0.632493	0.0470934	0.834606	-
ENSMUSG00000001494_Sost	19.8172	15.0681	13.027	4.64781	1.00756	6.14122	-2.02369	0.000898858	0.161885	-
ENSMUSG00000001504_Irx2	31.5274	63.0975	28.0581	39.9711	45.3401	27.6355	-0.119261	0.768425	0.979591	-
ENSMUSG00000001506_Col1a1	20.718	32.9614	23.0477	23.239	13.0982	40.9415	0.00799204	0.984255	0.999082	-
ENSMUSG00000001507_Itga3	2053.79	2654.8	2442.06	1801.49	1984.89	2084.95	-0.284405	0.082843	0.911908	-
ENSMUSG00000001510_Dlx3	17.1149	25.4274	19.0394	6.50693	3.02267	2.04707	-2.39226	0.00021814	0.0589797	-
ENSMUSG00000001517_Foxm1	404.452	613.082	428.888	488.949	648.867	542.475	0.215947	0.286146	0.911908	-
ENSMUSG00000001518_Itfg2	284.648	305.128	284.589	302.107	327.456	398.156	0.232233	0.156359	0.911908	-
ENSMUSG00000001520_Nrip2	27.0235	47.0877	48.0996	52.0554	44.3325	92.1184	0.626369	0.0984264	0.911908	-
ENSMUSG00000001521_Tulp3	398.147	487.828	463.961	549.371	543.073	573.181	0.303574	0.0323569	0.782064	-
ENSMUSG00000001524_Gtf2h4	1114.27	1014.27	950.97	1110.83	980.353	866.936	-0.0577598	0.574811	0.948196	-
ENSMUSG00000001525_Tubb5	25993.9	28483.3	22967.6	26711.9	28519.9	20237.4	-0.0372796	0.764855	0.979127	-
ENSMUSG00000001542_Ell2	820.614	874.889	807.673	850.549	928.968	764.582	0.0234367	0.814307	0.98426	-
ENSMUSG00000001552_Jup	2035.77	2585.11	2584.35	2232.81	2345.59	2932.43	0.0599281	0.720469	0.971295	-
ENSMUSG00000001555_Fkbp10	588.212	518.906	624.293	533.568	525.945	600.816	-0.0605021	0.540433	0.941851	-
ENSMUSG00000001558_Klhl10	32.4282	22.6021	18.0374	25.0982	36.2721	18.4237	0.122266	0.762386	0.978659	-
ENSMUSG00000001569_Nom1	1731.31	1736.59	1667.45	1876.78	1831.74	1528.14	0.0283965	0.780926	0.981434	-
ENSMUSG00000001576_Ergic1	1015.18	1164.01	1196.48	1070.85	1234.26	1121.8	0.0219545	0.816031	0.98426	-
ENSMUSG00000001583_Tnk1	34.2298	50.8547	36.0747	37.1825	35.2645	49.1298	0.00328676	0.991528	0.999082	-
ENSMUSG00000001588_Acap1	118.003	99.8259	170.353	108.759	92.6953	205.731	0.068952	0.831091	0.9853	-
ENSMUSG00000001604_Tcea3	921.502	972.832	648.343	970.462	991.436	663.252	0.0459454	0.823248	0.9853	-
ENSMUSG00000001627_Ifrd1	2455.54	2259.27	2745.69	2610.21	2424.18	2602.86	0.0340471	0.71136	0.97056	-
ENSMUSG00000001630_Stk38l	641.358	621.558	697.445	654.411	568.262	642.781	-0.0705647	0.444771	0.926853	-
ENSMUSG00000001632_Brpf1	1880.84	2075.63	1800.73	1862.84	2001.01	2119.75	0.0552794	0.54479	0.942187	-
ENSMUSG00000001642_Akr1b3	4376.91	3997.74	2769.74	4514.88	4280.1	2474.91	0.0161539	0.95928	0.996944	-
ENSMUSG00000001655_Hoxc13	128.812	158.215	171.355	111.547	122.922	169.907	-0.18131	0.439562	0.925726	-
ENSMUSG00000001656_Hoxc11	18.0157	27.3109	25.0519	19.5208	33.2494	37.8709	0.363899	0.503074	0.93752	-
ENSMUSG00000001663_Gstt1	36.9321	16.0098	47.0975	27.8868	37.2796	24.5649	-0.154724	0.70302	0.969793	-
ENSMUSG00000001665_Gstt3	101.789	110.185	94.1951	78.0831	89.6726	82.9065	-0.290122	0.171323	0.911908	-
ENSMUSG00000001666_Ddt	698.108	719.5	639.324	688.805	804.031	527.122	-0.0261512	0.877054	0.988766	-
ENSMUSG00000001672_Marveld3	32.4282	33.9031	22.0457	26.9573	39.2947	24.5649	0.036335	0.933395	0.995106	-
ENSMUSG00000001674_Ddx18	6085.7	6455.72	5239.85	6262.45	6302.27	5388.92	0.0139	0.916629	0.991782	-
ENSMUSG00000001687_Ubl3	3213.1	3197.25	3581.42	3057.33	3161.71	3255.87	-0.076531	0.32083	0.91642	-
ENSMUSG00000001700_Gramd3	96.3839	113.952	114.237	109.688	80.6046	89.0478	-0.211989	0.247767	0.911908	-
ENSMUSG00000001707_Eef1e1	2627.59	2221.6	2550.28	2415.93	2223.68	2017.39	-0.152412	0.243812	0.911908	-
ENSMUSG00000001729_Akt1	476.515	542.45	489.013	468.499	487.658	436.027	-0.115076	0.371032	0.91642	-
ENSMUSG00000001739_Cldn15	20.718	28.2526	32.0664	20.4503	16.1209	23.5414	-0.428913	0.391211	0.91642	-
ENSMUSG00000001741_Il16	3.60314	1.88351	10.0208	14.873	7.0529	12.2824	1.16162	0.0872445	0.911908	-
ENSMUSG00000001750_Tcirg1	293.656	310.779	291.604	254.7	276.071	336.744	-0.047473	0.803421	0.98406	-
ENSMUSG00000001751_Naglu	63.9557	55.5635	60.1245	48.3372	57.4308	79.8359	0.0431131	0.867322	0.987167	-
ENSMUSG00000001755_Coasy	444.987	437.916	390.809	481.513	469.522	475.945	0.163286	0.172426	0.911908	-
ENSMUSG00000001761_Smo	789.087	810.85	664.376	791.057	794.963	686.794	0.00515948	0.966328	0.998702	-
ENSMUSG00000001763_Tspan33	59.4517	57.447	44.0913	47.4076	39.2947	36.8473	-0.381744	0.183843	0.911908	-
ENSMUSG00000001767_Crnkl1	3717.54	3663.42	3655.57	3846.52	3800.51	3046.05	-0.0454867	0.674897	0.96667	-
ENSMUSG00000001768_Rin2	151.332	159.156	158.328	153.378	149.118	154.554	-0.0362139	0.81082	0.984094	-
ENSMUSG00000001774_Chordc1	2918.54	2691.53	2858.92	2908.6	2743.58	2553.73	-0.0453591	0.606318	0.956754	-
ENSMUSG00000001783_D10Wsu52e	5862.3	4528.89	5278.93	5355.2	4806.05	4215.95	-0.124181	0.36003	0.91642	-
ENSMUSG00000001785_Pwp1	2953.67	2616.19	2751.7	2917.89	2536.02	2226.19	-0.115578	0.383018	0.91642	-
ENSMUSG00000001786_Fbxo7	267.533	276.876	302.627	284.446	320.403	319.344	0.12582	0.27367	0.911908	-
ENSMUSG00000001794_Capns1	2536.61	2873.29	3446.14	2569.31	2843.33	2741.03	-0.119067	0.365094	0.91642	-
ENSMUSG00000001802_Lrp3	34.2298	55.5635	36.0747	27.8868	37.2796	28.659	-0.42542	0.179716	0.911908	-
ENSMUSG00000001827_Folr1	928.708	930.453	831.723	864.492	869.522	664.276	-0.165843	0.153476	0.911908	-
ENSMUSG00000001829_Clpb	2147.47	1932.48	2017.18	2081.29	1976.83	2049.12	0.00230028	0.971671	0.999082	-
ENSMUSG00000001833_Sept7	6153.26	5108.07	5928.28	5723.31	5028.72	4262.01	-0.195151	0.199651	0.911908	-
ENSMUSG00000001844_Zdhhc4	270.235	279.701	298.618	286.305	338.539	280.449	0.0937293	0.460489	0.927205	-
ENSMUSG00000001847_Rac1	1619.61	2599.24	1711.54	1865.63	2203.53	1626.4	-0.0582887	0.788789	0.982039	-
ENSMUSG00000001855_Nup214	1398.92	1940.95	1644.41	2058.05	2175.32	2239.5	0.377059	0.0212538	0.687615	-
ENSMUSG00000001864_Aif1l	71.1619	81.9326	67.1391	71.5762	76.5743	56.2946	-0.106773	0.643235	0.963802	-
ENSMUSG00000001870_Ltbp1	76.5666	76.2821	77.1598	78.0831	84.6348	116.683	0.278023	0.192698	0.911908	-
ENSMUSG00000001891_Ugp2	833.225	804.258	882.828	795.704	711.335	730.806	-0.170942	0.147063	0.911908	-
ENSMUSG00000001901_Kcnh6	9.90862	6.59228	5.01038	10.2252	10.0756	12.2824	0.589098	0.308454	0.91306	-
ENSMUSG00000001909_Trmt1	2089.82	2239.49	1952.04	2065.49	2343.58	2231.31	0.0798421	0.38115	0.91642	-
ENSMUSG00000001910_Nacc1	3218.5	3771.72	3383.01	3671.77	3698.74	3450.34	0.0610004	0.596816	0.954679	-
ENSMUSG00000001918_Slc1a5	487.324	687.48	557.154	522.413	677.078	732.853	0.157608	0.41393	0.921258	-
ENSMUSG00000001924_Uba1	11315.6	11561	11376.6	11544.2	11566.8	10582.4	-0.0237326	0.725045	0.972048	-
ENSMUSG00000001930_Vwf	101.789	130.904	91.1889	136.646	101.763	126.919	0.17389	0.415388	0.921883	-
ENSMUSG00000001942_Siae	253.12	276.876	240.498	229.602	203.527	272.261	-0.12848	0.343167	0.91642	-
ENSMUSG00000001946_Esam	81.0706	88.5249	87.1806	69.7171	64.4837	63.4593	-0.375364	0.0483969	0.836311	-
ENSMUSG00000001948_Spa17	24.3212	25.4274	48.0996	27.8868	39.2947	27.6355	-0.0401146	0.909283	0.990965	-
ENSMUSG00000001962_Fam50a	535.966	571.645	454.942	506.611	573.3	415.556	-0.0635052	0.718322	0.971295	-
ENSMUSG00000001964_Emd	1080.04	1210.15	1089.26	1069.93	1184.89	904.807	-0.0968784	0.39023	0.91642	-
ENSMUSG00000001983_Taco1	314.374	333.381	290.602	331.853	369.773	266.12	0.0445249	0.789927	0.982106	-
ENSMUSG00000001985_Grik3	834.126	1064.18	972.013	1027.17	1162.72	1464.68	0.348416	0.144318	0.911908	-
ENSMUSG00000001986_Gria3	59.4517	62.1558	52.1079	98.5335	91.6877	71.6476	0.592869	0.00465425	0.393687	-
ENSMUSG00000001988_Npas1	9.90862	16.0098	9.01868	26.0277	16.1209	27.6355	0.997444	0.0250527	0.726015	-
ENSMUSG00000001995_Sipa1l2	1347.57	1568.02	1538.19	1380.4	1460.96	1677.58	0.0208907	0.870006	0.987446	-
ENSMUSG00000001998_Ap4e1	873.761	918.21	915.897	853.337	906.801	1036.84	0.0461716	0.608238	0.956754	-
ENSMUSG00000001999_Blvra	334.191	311.721	335.695	303.037	286.146	270.214	-0.1912	0.200607	0.911908	-
ENSMUSG00000002006_Pdzd4	460.301	447.333	396.822	437.823	474.559	450.356	0.0623515	0.674955	0.96667	-
ENSMUSG00000002007_Srpk3	12.611	18.8351	14.0291	18.5912	29.2192	50.1533	1.10387	0.0292308	0.758332	-
ENSMUSG00000002010_Idh3g	1493.5	1678.21	1579.27	1492.88	1601.01	1467.75	-0.0585888	0.466819	0.928648	-
ENSMUSG00000002012_Pnck	17.1149	15.0681	26.054	19.5208	19.1436	14.3295	-0.130141	0.780888	0.981434	-
ENSMUSG00000002014_Ssr4	1269.2	1065.12	1299.69	1096.88	1172.8	1240.53	-0.050157	0.667147	0.96667	-
ENSMUSG00000002015_Bcap31	2409.6	2232.9	2373.92	2350.86	2133	2254.85	-0.058104	0.458438	0.926853	-
ENSMUSG00000002017_Fam98a	557.585	581.062	688.426	739.931	708.313	603.887	0.169035	0.154742	0.911908	-
ENSMUSG00000002020_Ltbp2	25.222	48.9712	38.0789	52.985	42.3174	48.1063	0.358311	0.183718	0.911908	-
ENSMUSG00000002028_Mll1	1518.72	2312.01	1858.85	1828.45	2307.31	3752.29	0.471309	0.212338	0.911908	-
ENSMUSG00000002031_Ift46	850.34	856.054	889.843	871.928	827.204	821.901	-0.0417866	0.622603	0.95992	-
ENSMUSG00000002032_Tmem25	6.30549	16.0098	10.0208	10.2252	20.1511	16.3766	0.530336	0.342795	0.91642	-
ENSMUSG00000002043_Trappc6a	326.084	274.05	341.708	316.051	230.731	352.097	-0.0669916	0.702368	0.969793	-
ENSMUSG00000002052_Supt6h	3948.14	4537.37	4332.97	4498.15	4659.95	5082.89	0.151813	0.143725	0.911908	-
ENSMUSG00000002055_Spag5	1724.1	1845.84	1508.12	1867.49	1936.52	1563.97	0.080007	0.402188	0.918958	-
ENSMUSG00000002058_Unc119	352.207	339.973	277.575	344.867	332.494	340.838	0.0690809	0.608219	0.956754	-
ENSMUSG00000002059_Rab34	304.465	252.39	236.49	257.488	279.093	255.884	-0.00369878	0.977356	0.999082	-
ENSMUSG00000002064_Sdf2	798.995	673.354	879.822	805	722.418	786.077	-0.0233531	0.846943	0.9853	-
ENSMUSG00000002068_Ccne1	2915.84	3242.46	2767.73	2748.71	3025.69	2129.98	-0.175323	0.222478	0.911908	-
ENSMUSG00000002076_Hsf2bp	798.095	612.14	606.256	715.762	576.323	500.51	-0.16965	0.421075	0.923997	-
ENSMUSG00000002083_Bbc3	486.423	599.897	425.882	538.216	535.013	461.615	0.0213364	0.901511	0.990685	-
ENSMUSG00000002100_Mybpc3	8.10706	14.1263	21.0436	7.43649	7.0529	9.21184	-0.86326	0.141906	0.911908	-
ENSMUSG00000002102_Psmc3	7272.93	6434.06	7130.77	6600.81	6555.17	5778.89	-0.138102	0.15217	0.911908	-
ENSMUSG00000002103_Acp2	306.267	362.575	405.841	271.432	382.872	528.145	0.13735	0.528512	0.941169	-
ENSMUSG00000002105_Slc39a13	213.486	190.234	187.388	218.447	217.632	233.367	0.178293	0.237836	0.911908	-
ENSMUSG00000002107_Celf2	57.6502	37.6702	29.0602	46.4781	52.393	41.965	0.173666	0.570882	0.948003	-
ENSMUSG00000002108_Nr1h3	50.4439	54.6217	46.0955	44.6189	46.3476	25.5884	-0.372377	0.175739	0.911908	-
ENSMUSG00000002109_Ddb2	175.653	162.923	224.465	191.49	182.368	241.555	0.129054	0.478407	0.932201	-
ENSMUSG00000002111_Sfpi1	12.611	11.301	20.0415	10.2252	3.02267	9.21184	-0.9626	0.202917	0.911908	-
ENSMUSG00000002129_Sf3a1	2764.51	3516.51	2625.44	3011.78	3668.52	2762.53	0.0843235	0.615392	0.959167	-
ENSMUSG00000002147_Stat6	510.745	577.295	532.102	534.498	547.104	527.122	-0.00998808	0.911408	0.991065	-
ENSMUSG00000002190_Clgn	200.875	174.224	175.363	201.715	198.489	241.555	0.219259	0.12848	0.911908	-
ENSMUSG00000002204_Napsa	21.6188	37.6702	51.1058	38.112	43.325	45.0356	0.202125	0.517951	0.939619	-
ENSMUSG00000002205_Vrk3	483.721	469.935	528.094	504.752	500.756	487.204	0.0115725	0.904353	0.990685	-
ENSMUSG00000002210_1500002O20Rik	161.24	178.933	152.315	210.081	187.406	189.354	0.253161	0.12746	0.911908	-
ENSMUSG00000002221_Paxip1	1538.54	1769.56	1719.56	1666.7	1808.57	1909.92	0.0990693	0.362345	0.91642	-
ENSMUSG00000002222_Rmnd5a	5307.42	5224.85	5360.1	4968.51	4764.74	5069.58	-0.102441	0.125503	0.911908	-
ENSMUSG00000002227_Mov10	454.896	560.344	489.013	603.285	694.207	616.17	0.347262	0.045889	0.829395	-
ENSMUSG00000002228_Ppm1j	295.457	261.808	399.828	263.066	263.98	402.25	-0.0424758	0.864248	0.986769	-
ENSMUSG00000002233_Rhoc	418.865	404.954	474.984	390.416	436.272	430.909	-0.0464016	0.721657	0.971823	-
ENSMUSG00000002249_Tead3	95.4831	90.4084	86.1785	69.7171	69.5214	51.1769	-0.513615	0.0276671	0.746178	-
ENSMUSG00000002250_Ppard	99.987	113.952	120.249	123.632	104.786	123.848	0.0778441	0.695125	0.969793	-
ENSMUSG00000002257_Def6	879.165	939.87	833.727	796.634	802.015	720.57	-0.193808	0.0638107	0.882486	-
ENSMUSG00000002265_Peg3	1098.06	1330.7	821.702	1176.82	1272.54	895.595	0.0412543	0.854994	0.985715	-
ENSMUSG00000002266_Zim1	10.8094	12.2428	7.01453	14.873	13.0982	7.16476	0.225601	0.674224	0.96667	-
ENSMUSG00000002274_Metrn	445.888	549.042	499.034	438.753	439.295	495.392	-0.121392	0.278365	0.911908	-
ENSMUSG00000002279_Lmf1	173.851	179.875	163.338	154.307	164.232	268.167	0.180444	0.414842	0.921883	-
ENSMUSG00000002280_Narfl	933.212	901.258	920.907	889.59	848.363	895.595	-0.0652072	0.360663	0.91642	-
ENSMUSG00000002289_Angptl4	387.337	339.973	347.72	341.149	313.35	310.132	-0.156232	0.130086	0.911908	-
ENSMUSG00000002290_Rab11b-ps2	20.718	25.4274	32.0664	38.112	18.136	49.1298	0.433589	0.279667	0.911908	-
ENSMUSG00000002297_Dbf4	4254.4	4522.3	4091.47	4377.3	4610.58	4393.02	0.0562474	0.409324	0.919659	-
ENSMUSG00000002307_Daxx	2294.3	2310.12	2257.68	2246.75	2262.97	2178.09	-0.0371096	0.598045	0.954973	-
ENSMUSG00000002308_Cd320	935.915	792.015	846.754	945.364	896.726	781.983	0.0276423	0.793753	0.982863	-
ENSMUSG00000002319_Ipo4	927.808	1019.92	761.577	972.321	1081.11	946.772	0.146579	0.238708	0.911908	-
ENSMUSG00000002320_Tm9sf1	293.656	340.915	300.623	327.206	337.532	314.226	0.0661087	0.630379	0.961458	-
ENSMUSG00000002324_Rec8	103.59	100.768	114.237	93.8857	109.824	87.0007	-0.131458	0.528671	0.941169	-
ENSMUSG00000002325_Irf9	142.324	181.758	161.334	166.391	163.224	231.319	0.207918	0.2747	0.911908	-
ENSMUSG00000002326_Gmpr2	378.329	310.779	315.654	342.079	337.532	278.402	-0.068824	0.641096	0.962889	-
ENSMUSG00000002329_Mdp1	306.267	252.39	296.614	291.882	257.935	288.638	-0.0282979	0.819869	0.984897	-
ENSMUSG00000002332_Dhrs1	280.144	274.05	277.575	277.939	228.715	279.426	-0.0809547	0.514459	0.939155	-
ENSMUSG00000002341_Ncan	164.843	161.982	91.1889	184.983	177.33	121.801	0.210638	0.391692	0.91642	-
ENSMUSG00000002342_Tmem161a	430.575	398.362	366.76	463.851	422.166	476.968	0.187586	0.0479512	0.836311	-
ENSMUSG00000002343_Armc6	559.387	559.402	432.897	611.651	547.104	474.921	0.0741352	0.570917	0.948003	-
ENSMUSG00000002345_2310045N01Rik	217.99	223.196	180.374	233.32	234.761	179.119	0.0581748	0.714885	0.971181	-
ENSMUSG00000002346_Slc25a42	103.59	127.137	85.1764	136.646	131.99	169.907	0.471086	0.0305486	0.76706	-
ENSMUSG00000002365_Snx9	245.013	267.458	218.452	263.995	290.176	210.849	0.0656868	0.724451	0.972048	-
ENSMUSG00000002372_Ranbp3	1673.66	1761.08	1615.35	1653.69	1799.5	1651.99	0.0153579	0.832	0.9853	-
ENSMUSG00000002379_Ndufa11	2066.4	1755.43	1741.61	1884.22	1711.84	1364.38	-0.165375	0.224363	0.911908	-
ENSMUSG00000002384_Bmp8b	59.4517	59.3305	88.1826	55.7737	40.3023	79.8359	-0.233543	0.491493	0.935767	-
ENSMUSG00000002393_Nr2f6	660.275	703.49	617.278	649.763	609.572	617.193	-0.078239	0.469934	0.929908	-
ENSMUSG00000002395_Use1	1036.8	924.802	1050.18	1010.43	941.058	889.454	-0.0834694	0.311585	0.914439	-
ENSMUSG00000002396_Ocel1	535.066	536.8	436.905	527.061	474.559	495.392	-0.0118859	0.91774	0.991827	-
ENSMUSG00000002409_Dyrk1b	81.9713	92.2919	85.1764	90.1674	96.7255	141.248	0.337738	0.25657	0.911908	-
ENSMUSG00000002413_Braf	1546.65	1858.08	1739.6	1644.39	1902.27	1980.54	0.103492	0.473182	0.930641	-
ENSMUSG00000002416_Ndufb2	1189.03	926.686	1041.16	1157.3	1062.97	812.689	-0.0575702	0.734173	0.972708	-
ENSMUSG00000002428_Hltf	1977.22	1729.06	1706.53	1762.45	1709.82	1659.15	-0.0771915	0.417564	0.923913	-
ENSMUSG00000002455_Prpf6	3427.48	3862.13	3691.65	3728.47	4011.08	3494.36	0.0329216	0.686952	0.968771	-
ENSMUSG00000002458_Rgs19	382.833	402.129	298.618	404.359	469.522	346.979	0.171377	0.31284	0.914598	-
ENSMUSG00000002459_Rgs20	16.2141	27.3109	12.0249	14.873	20.1511	23.5414	0.0671024	0.859248	0.986427	-
ENSMUSG00000002475_Abhd3	42.3368	33.9031	47.0975	55.7737	50.3779	24.5649	0.0893404	0.779742	0.981434	-
ENSMUSG00000002477_Snrpd1	2645.6	2270.57	2532.24	2466.13	2352.65	1934.49	-0.14125	0.368225	0.91642	-
ENSMUSG00000002486_Tchp	339.596	350.332	315.654	382.979	421.159	372.568	0.226139	0.0796956	0.911908	-
ENSMUSG00000002489_Tiam1	1095.35	1371.19	1205.5	1110.83	1375.32	1367.45	0.06934	0.570656	0.948003	-
ENSMUSG00000002496_Tsc2	1354.78	1621.7	1457.02	1494.73	1578.84	1907.87	0.167985	0.252657	0.911908	-
ENSMUSG00000002504_Slc9a3r2	195.47	198.71	171.355	137.575	138.035	124.872	-0.498463	0.000287518	0.0718134	-
ENSMUSG00000002524_Puf60	3926.52	3933.71	3174.57	4077.99	3672.55	2908.89	-0.0499013	0.748237	0.975222	-
ENSMUSG00000002546_Golga2	994.466	1067.01	1004.08	926.773	1128.46	1196.52	0.0843658	0.427948	0.925018	-
ENSMUSG00000002550_Uck1	1101.66	1136.7	1190.47	1073.64	1042.82	1111.56	-0.0867742	0.289407	0.911908	-
ENSMUSG00000002565_Scin	11.7102	10.3593	10.0208	12.0843	2.01511	4.09415	-0.804859	0.283015	0.911908	-
ENSMUSG00000002578_Ikzf4	13.5118	18.8351	18.0374	18.5912	16.1209	15.3531	-0.00311201	0.993612	0.999082	-
ENSMUSG00000002580_1810046J19Rik	477.416	386.119	449.932	387.627	371.789	318.32	-0.284931	0.0752272	0.908901	-
ENSMUSG00000002602_Axl	36.9321	30.1361	42.0872	39.9711	45.3401	61.4122	0.425247	0.12981	0.911908	-
ENSMUSG00000002603_Tgfb1	51.3447	86.6413	63.1308	59.4919	40.3023	97.2361	-0.0304402	0.9264	0.993381	-
ENSMUSG00000002608_Ccdc97	264.831	308.895	376.78	369.965	385.894	497.439	0.399306	0.086283	0.911908	-
ENSMUSG00000002617_Zfp40	208.081	207.186	241.5	256.559	244.836	240.531	0.177871	0.174336	0.911908	-
ENSMUSG00000002625_Akap8l	1170.12	1091.49	1056.19	1003	1073.05	1006.14	-0.107004	0.153215	0.911908	-
ENSMUSG00000002635_Pdcd2l	955.732	747.753	818.696	924.913	725.441	725.688	-0.0858415	0.57783	0.948526	-
ENSMUSG00000002658_Gtf2f1	1877.23	1782.74	1742.61	1823.8	1903.28	1500.51	-0.0474204	0.637488	0.962307	-
ENSMUSG00000002660_Clpp	1389.91	1301.5	1179.44	1285.58	1273.55	905.831	-0.159715	0.343321	0.91642	-
ENSMUSG00000002661_Alkbh7	372.024	298.536	295.612	395.064	378.841	268.167	0.109241	0.533685	0.941169	-
ENSMUSG00000002679_Med6	1239.48	1230.87	1300.69	1128.49	1063.98	1020.47	-0.230708	0.0373964	0.816904	-
ENSMUSG00000002688_Prkd1	14.4125	10.3593	20.0415	13.0139	13.0982	17.4001	-0.0404244	0.932505	0.995106	-
ENSMUSG00000002718_Cse1l	8904.25	9351.62	8604.82	9083.67	8962.22	7695.98	-0.0613514	0.570364	0.948003	-
ENSMUSG00000002728_Naa20	2183.5	2020.06	2339.85	1881.43	1902.27	2004.09	-0.176988	0.0860661	0.911908	-
ENSMUSG00000002731_Prkra	343.199	301.361	343.712	311.403	303.275	296.826	-0.116254	0.368048	0.91642	-
ENSMUSG00000002732_Fkbp7	53.1463	60.2722	53.11	55.7737	58.4383	55.271	0.0251237	0.924299	0.99319	-
ENSMUSG00000002733_Plekha3	1203.45	1223.34	1124.33	1214.01	1182.87	1067.55	-0.0355331	0.681346	0.968161	-
ENSMUSG00000002741_Ykt6	2966.28	2482.46	2774.75	2665.05	2484.64	2241.55	-0.153803	0.143588	0.911908	-
ENSMUSG00000002748_Baz1b	5123.66	5971.66	5458.3	5346.84	6133	6398.13	0.110973	0.312812	0.914598	-
ENSMUSG00000002763_Pex6	726.032	704.432	585.212	748.297	680.101	814.736	0.15358	0.2537	0.911908	-
ENSMUSG00000002767_Mrpl2	1929.48	1908.93	1743.61	1880.5	1787.41	1570.11	-0.091677	0.379696	0.91642	-
ENSMUSG00000002768_Mea1	577.403	516.081	561.162	569.821	548.111	441.145	-0.085289	0.560495	0.945541	-
ENSMUSG00000002771_Grin2d	19.8172	19.7768	21.0436	17.6617	22.1663	23.5414	0.0615513	0.884085	0.989266	-
ENSMUSG00000002778_Kdelr1	463.003	444.508	499.034	488.02	441.31	479.016	0.00298407	0.97483	0.999082	-
ENSMUSG00000002781_Tmem143	435.079	443.566	334.693	387.627	447.355	387.921	0.0100244	0.944723	0.995993	-
ENSMUSG00000002797_Ggct	308.969	270.283	274.569	303.037	301.26	274.308	0.0410721	0.786161	0.981449	-
ENSMUSG00000002799_Jag2	419.765	479.353	361.749	428.528	392.947	412.486	-0.0314304	0.84473	0.9853	-
ENSMUSG00000002803_Btbd6	208.081	214.72	162.336	223.095	226.7	248.72	0.253422	0.120026	0.911908	-
ENSMUSG00000002804_Nudt14	239.609	198.71	257.533	257.488	211.587	264.073	0.0760864	0.661726	0.966181	-
ENSMUSG00000002808_Epdr1	145.927	126.195	104.216	175.687	141.058	99.2831	0.145407	0.494086	0.935767	-
ENSMUSG00000002812_Flii	1307.04	1293.03	1348.79	1288.37	1307.81	1272.26	-0.0294928	0.67899	0.967734	-
ENSMUSG00000002814_Top3a	724.23	840.044	782.621	818.943	805.038	847.489	0.0748613	0.394935	0.917269	-
ENSMUSG00000002820_Atg4d	567.494	522.673	524.085	473.147	521.915	560.898	-0.0544802	0.59901	0.95521	-
ENSMUSG00000002825_Qtrt1	517.05	478.411	593.229	498.245	515.869	490.274	-0.0777883	0.471866	0.930641	-
ENSMUSG00000002831_Plin4	54.047	46.1459	56.1162	51.1259	64.4837	137.154	0.691712	0.0985783	0.911908	-
ENSMUSG00000002833_Hdgfrp2	2212.33	2374.16	2061.27	2431.73	2260.96	2077.78	0.026478	0.794278	0.982895	-
ENSMUSG00000002835_Chaf1a	1546.65	1774.26	1355.81	1720.62	1886.15	1513.81	0.130648	0.269204	0.911908	-
ENSMUSG00000002844_Adprh	1204.35	1180.02	1078.23	1199.13	1182.87	1093.14	0.00503148	0.950591	0.995993	-
ENSMUSG00000002845_Tmem39a	1300.73	1481.38	1418.94	1395.27	1421.66	1431.93	0.0164855	0.846771	0.9853	-
ENSMUSG00000002846_4930455C21Rik	944.022	699.723	834.729	880.295	727.456	722.617	-0.0885502	0.48752	0.934815	-
ENSMUSG00000002847_Pla1a	32.4282	29.1944	47.0975	29.746	18.136	19.4472	-0.681938	0.0571168	0.857133	-
ENSMUSG00000002870_Mcm2	9003.34	9761.28	7686.92	9328.15	9808.57	7325.46	0.000575399	0.996898	0.99917	-
ENSMUSG00000002871_Tpra1	137.82	108.302	105.218	133.857	114.862	126.919	0.0948773	0.58347	0.950093	-
ENSMUSG00000002881_Nab1	658.473	658.286	802.662	627.454	625.693	737.97	-0.089808	0.469471	0.929792	-
ENSMUSG00000002885_Cd97	1622.31	1940.01	1997.14	1240.03	1416.63	1731.83	-0.341329	0.0480968	0.836311	-
ENSMUSG00000002897_Il17ra	168.447	160.098	215.446	164.532	184.383	199.59	0.0125587	0.941242	0.99567	-
ENSMUSG00000002900_Lamb1	3853.55	3435.52	2628.44	3534.19	3182.87	2780.95	-0.0624011	0.726165	0.972048	-
ENSMUSG00000002908_Kcnn1	143.225	136.554	115.239	105.97	97.733	90.0713	-0.427427	0.0331056	0.78964	-
ENSMUSG00000002910_Arrdc2	145.026	155.389	177.367	136.646	174.307	184.237	0.0511738	0.798438	0.983644	-
ENSMUSG00000002948_Map2k7	493.63	540.567	517.071	465.71	507.809	549.64	-0.0271585	0.785664	0.981449	-
ENSMUSG00000002949_Timm44	1195.34	1204.5	1114.31	1200.06	1206.05	1106.44	-0.000737373	0.992802	0.999082	-
ENSMUSG00000002957_Ap2a2	3968.85	4263.32	3793.86	3883.71	4006.05	3761.5	-0.0457301	0.58485	0.950093	-
ENSMUSG00000002963_Pnkp	427.872	374.818	387.803	399.711	455.416	452.404	0.133892	0.247512	0.911908	-
ENSMUSG00000002968_Med25	644.961	885.249	752.559	752.945	771.789	865.913	0.0666197	0.739152	0.973064	-
ENSMUSG00000002980_Bcam	2025.86	2109.53	2365.9	2146.36	2197.48	2598.76	0.0947648	0.520849	0.939947	-
ENSMUSG00000002981_Clptm1	1460.17	1460.66	1423.95	1447.33	1556.68	1496.41	0.0505129	0.545736	0.942187	-
ENSMUSG00000002983_Relb	260.327	248.623	285.591	259.348	264.988	342.885	0.125717	0.393175	0.916777	-
ENSMUSG00000002984_Tomm40	4060.73	4504.41	3639.54	4467.47	4413.1	4066.51	0.0851524	0.424497	0.92426	-
ENSMUSG00000002985_Apoe	4670.57	3969.49	4928.21	4038.94	3706.8	4411.45	-0.158399	0.146411	0.911908	-
ENSMUSG00000002996_Hbp1	2668.12	2590.76	2473.12	2565.59	2272.04	2206.75	-0.134257	0.210333	0.911908	-
ENSMUSG00000002997_Prkar2b	69.3604	86.6413	78.1619	105.04	69.5214	61.4122	0.0160447	0.947413	0.995993	-
ENSMUSG00000003031_Cdkn1b	711.619	717.616	610.264	631.172	646.852	564.993	-0.146451	0.21837	0.911908	-
ENSMUSG00000003032_Klf4	726.933	1135.76	690.43	1346	1491.18	1468.78	0.753927	0.000345159	0.0829533	-
ENSMUSG00000003033_Ap1m1	409.857	462.401	304.631	420.162	449.37	318.32	0.0130946	0.950687	0.995993	-
ENSMUSG00000003037_Rab8a	1492.6	1404.15	1579.27	1353.44	1368.26	1210.84	-0.186281	0.0297537	0.762434	-
ENSMUSG00000003038_Hmgn2	1208.85	1238.41	1028.13	1223.3	1270.53	1004.09	0.00920604	0.93417	0.995106	-
ENSMUSG00000003039_Fam32a	1116.07	1143.29	1063.2	1134.06	1144.58	819.853	-0.100311	0.379411	0.91642	-
ENSMUSG00000003051_Elf3	457.598	518.906	404.838	382.05	315.365	295.802	-0.475395	0.00997715	0.529355	-
ENSMUSG00000003062_Stard3nl	1094.45	844.753	895.855	954.659	809.068	804.5	-0.142565	0.330786	0.91642	-
ENSMUSG00000003068_Stk11	2006.95	2027.6	1882.9	1943.71	1932.49	1836.23	-0.0509076	0.61504	0.959091	-
ENSMUSG00000003070_Efna2	124.308	102.651	84.1743	93.8857	99.7482	77.7888	-0.198782	0.377724	0.91642	-
ENSMUSG00000003072_Atp5d	1395.31	1752.6	1306.71	1579.32	1680.61	1381.78	0.0593255	0.719203	0.971295	-
ENSMUSG00000003099_Ppp5c	1464.67	1517.17	1232.55	1406.43	1503.28	1210.84	-0.0326302	0.807135	0.98406	-
ENSMUSG00000003119_Cdk12	3724.74	4336.78	4207.71	4055.68	4750.63	5145.32	0.185345	0.170428	0.911908	-
ENSMUSG00000003123_Lipe	124.308	165.749	161.334	164.532	182.368	151.484	0.144231	0.468021	0.928864	-
ENSMUSG00000003131_Pafah1b2	1726.8	1640.54	1879.89	1680.65	1685.64	1644.82	-0.0662102	0.513991	0.938536	-
ENSMUSG00000003134_Tbc1d8	668.382	681.83	698.447	666.495	804.031	907.878	0.214821	0.137243	0.911908	-
ENSMUSG00000003135_D1Bwg0212e	1696.18	1655.6	1540.19	1731.77	1689.67	1462.63	-0.00223518	0.978751	0.999082	-
ENSMUSG00000003153_Slc2a3	24236.5	24255.8	28281.6	25994.3	26609.6	31553.6	0.132479	0.219608	0.911908	-
ENSMUSG00000003154_Foxj2	60.3525	57.447	66.137	66.9284	90.6801	104.401	0.508796	0.0570401	0.857133	-
ENSMUSG00000003161_Sri	556.685	465.226	557.154	575.398	478.59	441.145	-0.0778539	0.592713	0.953034	-
ENSMUSG00000003166_Dgcr2	1075.54	1211.1	1118.32	1206.57	1313.85	1301.94	0.166623	0.0582119	0.86066	-
ENSMUSG00000003178_Mical3	441.384	606.489	480.996	559.596	546.096	649.946	0.199367	0.150456	0.911908	-
ENSMUSG00000003184_Irf3	358.512	388.944	336.697	362.529	429.219	394.062	0.128414	0.364468	0.91642	-
ENSMUSG00000003190_Bcl2l12	120.705	128.079	106.22	103.181	139.043	142.272	0.111103	0.533861	0.941169	-
ENSMUSG00000003198_Zfp959	226.097	219.429	220.457	184.983	209.572	198.566	-0.168033	0.273606	0.911908	-
ENSMUSG00000003199_Mpnd	725.131	674.296	867.797	758.522	693.199	763.559	-0.032664	0.782191	0.981434	-
ENSMUSG00000003200_Sh3gl1	1632.22	1638.65	1485.08	1633.24	1681.61	1476.96	0.0106861	0.887685	0.989266	-
ENSMUSG00000003208_Ccdc94	203.577	187.409	195.405	223.095	199.496	187.307	0.0576577	0.712231	0.97056	-
ENSMUSG00000003226_Ranbp2	15370.1	14854.3	16386.9	15823	15663.5	16196.5	0.0328178	0.655431	0.965734	-
ENSMUSG00000003228_Grk5	93.6815	67.8063	66.137	91.097	92.6953	41.965	-0.0111485	0.966968	0.998702	-
ENSMUSG00000003233_Dvl3	257.624	312.662	249.517	282.587	272.04	366.426	0.167435	0.443094	0.926386	-
ENSMUSG00000003234_Abcf3	1505.21	1379.67	1565.24	1390.62	1346.1	1426.81	-0.0958792	0.247788	0.911908	-
ENSMUSG00000003235_Eif2b5	4510.23	3890.38	4052.39	4302.01	3910.33	3489.24	-0.0897224	0.423764	0.924187	-
ENSMUSG00000003269_Cyth2	1451.16	1466.31	1445.99	1418.51	1453.9	1285.56	-0.0692948	0.295151	0.911908	-
ENSMUSG00000003273_Car11	17.1149	13.1846	17.0353	17.6617	21.1587	19.4472	0.298522	0.464591	0.928648	-
ENSMUSG00000003279_Dlgap1	42.3368	43.3207	49.1017	45.5485	47.3552	85.9771	0.407085	0.234556	0.911908	-
ENSMUSG00000003282_Plag1	358.512	460.518	395.82	460.133	552.141	533.263	0.346972	0.00872039	0.500134	-
ENSMUSG00000003283_Hck	4391.32	4331.13	4534.39	4223.93	4045.34	3834.17	-0.131183	0.127209	0.911908	-
ENSMUSG00000003299_Mrpl4	994.466	970.006	954.978	1016.01	946.096	886.383	-0.0351282	0.704496	0.969793	-
ENSMUSG00000003308_Keap1	886.371	957.764	809.677	933.28	899.749	838.277	0.00942195	0.907423	0.990965	-
ENSMUSG00000003309_Ap1m2	136.018	143.147	153.318	116.195	143.073	129.989	-0.152347	0.372571	0.91642	-
ENSMUSG00000003316_Glg1	2347.44	2672.7	2352.87	2854.68	2990.43	3443.18	0.333006	0.00284494	0.316053	-
ENSMUSG00000003341_Atp8b3	19.8172	12.2428	19.0394	16.7321	4.03023	31.7297	0.0367115	0.946024	0.995993	-
ENSMUSG00000003344_Btbd2	715.223	720.442	710.471	842.183	768.766	618.217	0.0552785	0.709798	0.97056	-
ENSMUSG00000003345_Csnk1g2	1985.33	2107.64	1742.61	1997.63	1976.83	1740.01	-0.0303231	0.75694	0.978037	-
ENSMUSG00000003346_Fam108a	842.233	854.171	815.689	855.196	873.552	766.63	-0.00954157	0.937346	0.995612	-
ENSMUSG00000003348_Mob3a	393.643	376.702	413.857	401.57	462.469	331.626	0.0145664	0.907624	0.990965	-
ENSMUSG00000003352_Cacnb3	183.76	198.71	104.216	189.631	229.723	136.13	0.189901	0.554875	0.943412	-
ENSMUSG00000003354_Ccdc65	36.0314	40.4954	22.0457	33.4642	43.325	18.4237	-0.0516506	0.896632	0.989609	-
ENSMUSG00000003355_Fkbp11	204.478	206.244	177.367	197.067	193.451	182.19	-0.0387025	0.825059	0.9853	-
ENSMUSG00000003360_Ddx23	3961.65	4142.77	3609.48	4086.35	4110.83	3204.7	-0.0389015	0.725001	0.972048	-
ENSMUSG00000003363_Pld3	482.82	555.635	612.268	582.835	537.028	620.264	0.0768398	0.567862	0.947895	-
ENSMUSG00000003378_Grik5	185.562	216.603	161.334	205.433	171.285	237.461	0.123245	0.512484	0.937706	-
ENSMUSG00000003380_Rabac1	1067.43	908.792	1295.68	1103.39	859.446	1034.8	-0.125816	0.430751	0.925726	-
ENSMUSG00000003382_Etv3	1007.98	1021.8	1053.18	1156.37	1101.26	1228.24	0.177299	0.0449373	0.828433	-
ENSMUSG00000003402_Prkcsh	2240.25	2215	2198.55	2256.97	2171.29	2306.03	0.0173023	0.831165	0.9853	-
ENSMUSG00000003410_Elavl3	44.1384	40.4954	49.1017	53.9146	41.3098	61.4122	0.229145	0.426742	0.924814	-
ENSMUSG00000003411_Rab3b	20.718	20.7186	18.0374	21.3799	34.2569	14.3295	0.232695	0.545582	0.942187	-
ENSMUSG00000003418_St8sia6	20.718	13.1846	18.0374	26.9573	13.0982	26.612	0.360997	0.464076	0.928164	-
ENSMUSG00000003420_Fcgrt	119.804	91.3501	163.338	110.618	90.6801	137.154	-0.14462	0.550874	0.94251	-
ENSMUSG00000003421_Nosip	1402.52	1364.6	1422.95	1364.6	1389.42	1222.1	-0.0752434	0.333651	0.91642	-
ENSMUSG00000003423_Pih1d1	717.925	612.14	578.198	593.06	567.255	518.933	-0.184855	0.0821322	0.911908	-
ENSMUSG00000003429_Rps11	13332.5	11878.3	13733.4	12402.2	11981.9	10972.3	-0.139411	0.237579	0.911908	-
ENSMUSG00000003435_Supt5h	2723.97	2879.88	2706.61	2750.57	2953.15	2788.12	0.0310754	0.738038	0.973064	-
ENSMUSG00000003436_Dll3	29.7259	67.8063	38.0789	38.112	63.4761	46.0592	0.121598	0.75001	0.975759	-
ENSMUSG00000003437_Paf1	1261.1	1226.16	1435.97	1209.36	1191.94	1203.68	-0.121558	0.178865	0.911908	-
ENSMUSG00000003438_Timm50	980.053	960.589	1014.1	953.73	804.031	849.536	-0.179532	0.0425411	0.823143	-
ENSMUSG00000003444_Med29	621.541	671.47	647.341	637.679	598.489	505.627	-0.154574	0.139529	0.911908	-
ENSMUSG00000003452_Bicd1	312.572	319.255	329.683	356.952	374.811	314.226	0.122195	0.355691	0.91642	-
ENSMUSG00000003458_Ncstn	951.228	999.201	1104.29	1012.29	1055.92	1277.37	0.131188	0.33813	0.91642	-
ENSMUSG00000003464_Pex19	2176.29	2036.07	2301.77	2053.4	1982.87	2127.93	-0.0795004	0.28929	0.911908	-
ENSMUSG00000003469_Phyhip	49.5431	52.7382	42.0872	44.6189	40.3023	44.0121	-0.164514	0.504895	0.93752	-
ENSMUSG00000003500_Impdh1	518.852	520.79	438.909	524.273	501.763	445.239	-0.00724425	0.959062	0.996944	-
ENSMUSG00000003518_Dusp3	625.144	549.042	616.276	562.385	466.499	547.593	-0.182978	0.0569052	0.857133	-
ENSMUSG00000003526_Prodh	314.374	292.885	263.546	280.728	277.078	292.732	-0.0352184	0.798557	0.983644	-
ENSMUSG00000003527_Dgcr14	717.024	712.908	732.517	766.888	724.434	720.57	0.0331731	0.704635	0.969793	-
ENSMUSG00000003528_Slc25a1	582.807	663.936	571.183	658.129	688.162	618.217	0.111801	0.257994	0.911908	-
ENSMUSG00000003531_Dgcr6	290.052	269.342	268.556	269.573	268.01	244.625	-0.081989	0.504602	0.93752	-
ENSMUSG00000003534_Ddr1	368.421	391.77	352.731	368.106	360.705	432.956	0.0613841	0.697986	0.969793	-
ENSMUSG00000003541_Ier3	179.256	166.69	205.425	193.349	151.134	163.766	-0.115952	0.598965	0.95521	-
ENSMUSG00000003545_Fosb	47.7416	49.913	56.1162	60.4215	31.2343	82.9065	0.183384	0.645562	0.964282	-
ENSMUSG00000003546_Klc4	718.826	543.392	571.183	686.016	628.716	550.663	0.0248769	0.858838	0.986427	-
ENSMUSG00000003549_Ercc1	445.888	428.498	414.859	452.696	435.265	402.25	0.00134876	0.988373	0.999082	-
ENSMUSG00000003559_As3mt	556.685	543.392	561.162	617.229	506.801	457.521	-0.0700419	0.644275	0.964282	-
ENSMUSG00000003573_Homer3	245.013	264.633	250.519	224.024	226.7	280.449	-0.0568556	0.738121	0.973064	-
ENSMUSG00000003575_Crtc1	106.293	136.554	105.218	118.054	132.998	222.108	0.440825	0.0681986	0.888972	-
ENSMUSG00000003581_Rnf215	171.149	159.156	153.318	196.137	136.02	176.048	0.0721897	0.704202	0.969793	-
ENSMUSG00000003585_Sec14l2	139.622	86.6413	87.1806	85.5196	85.6424	57.3181	-0.456647	0.111329	0.911908	-
ENSMUSG00000003604_Aven	958.434	886.19	874.812	948.153	835.265	743.088	-0.105692	0.345186	0.91642	-
ENSMUSG00000003623_Crot	1065.63	857.938	925.918	945.364	830.227	822.924	-0.132944	0.366715	0.91642	-
ENSMUSG00000003644_Rps6ka1	4007.59	4095.69	3884.04	3774.02	3631.24	3882.28	-0.0868337	0.277168	0.911908	-
ENSMUSG00000003657_Calb2	81.0706	64.0393	181.376	84.5901	77.5819	109.519	-0.262555	0.409798	0.920178	-
ENSMUSG00000003660_Snrnp200	20494.6	22228.2	20343.1	20770.1	22193.5	19325.4	-0.0178837	0.813582	0.98426	-
ENSMUSG00000003662_Ciao1	1588.98	1478.55	1571.25	1633.24	1346.1	1396.11	-0.0837637	0.351692	0.91642	-
ENSMUSG00000003665_Has1	26.1227	14.1263	20.0415	17.6617	7.0529	32.7532	-0.0723078	0.899244	0.990407	-
ENSMUSG00000003680_Taf6l	705.314	720.442	635.316	711.114	713.35	716.476	0.054267	0.58474	0.950093	-
ENSMUSG00000003721_Insig2	600.823	555.635	675.399	574.469	518.892	578.299	-0.131218	0.236586	0.911908	-
ENSMUSG00000003731_Kpna6	2202.42	2114.24	2294.75	2289.51	2269.02	2073.69	0.00495509	0.941084	0.995665	-
ENSMUSG00000003746_Man1a	57.6502	88.5249	77.1598	88.3083	85.6424	97.2361	0.282117	0.149628	0.911908	-
ENSMUSG00000003752_Itpkc	527.859	620.616	631.308	591.201	602.519	582.393	-0.00202337	0.983957	0.999082	-
ENSMUSG00000003762_Adck4	176.554	178.933	200.415	188.701	174.307	181.166	-0.0293826	0.856564	0.985753	-
ENSMUSG00000003778_Brd8	4273.32	4410.23	4122.54	4162.58	4465.49	4300.9	0.0136514	0.858249	0.986427	-
ENSMUSG00000003779_Kif20a	7656.66	7956.88	7189.89	7590.8	7602.02	6622.29	-0.0639041	0.435622	0.925726	-
ENSMUSG00000003808_Farsa	2984.3	2665.16	2572.33	2650.18	2569.27	2319.34	-0.125154	0.212711	0.911908	-
ENSMUSG00000003809_Gcdh	878.264	696.898	776.608	787.338	731.486	780.959	-0.0324217	0.809657	0.98406	-
ENSMUSG00000003810_Mast2	508.042	676.179	550.139	583.764	712.343	588.534	0.119807	0.493207	0.935767	-
ENSMUSG00000003812_Dnase2a	361.214	335.264	343.712	377.402	343.577	376.662	0.0775114	0.511104	0.937592	-
ENSMUSG00000003813_Rad23a	870.157	1040.64	915.897	969.532	1079.09	1034.8	0.125192	0.174679	0.911908	-
ENSMUSG00000003814_Calr	11801.2	11114.6	9530.74	11202.1	11084.1	7937.53	-0.102372	0.535732	0.941169	-
ENSMUSG00000003824_Syce2	354.008	323.022	339.704	318.84	328.464	297.849	-0.105299	0.373749	0.91642	-
ENSMUSG00000003847_Nfat5	1343.97	1739.42	1576.26	1891.66	1976.83	2717.49	0.49913	0.0105766	0.53846	-
ENSMUSG00000003848_Nob1	1157.51	1315.63	1084.25	1237.25	1253.4	1017.4	-0.0200494	0.865931	0.986981	-
ENSMUSG00000003849_Nqo1	917.899	859.821	856.774	850.549	837.28	661.205	-0.165022	0.13117	0.911908	-
ENSMUSG00000003863_Ppfia3	120.705	133.729	142.295	129.209	127.96	177.072	0.130005	0.531774	0.941169	-
ENSMUSG00000003865_Gys1	626.045	749.636	585.212	622.806	707.305	589.558	-0.0308029	0.872717	0.988391	-
ENSMUSG00000003868_Ruvbl2	5561.44	4981.88	4773.89	5475.12	5067	4581.35	-0.0183529	0.842923	0.9853	-
ENSMUSG00000003872_Lin7b	27.9243	9.41754	29.0602	25.0982	15.1134	22.5178	-0.0779635	0.848997	0.9853	-
ENSMUSG00000003873_Bax	4450.77	3497.67	3509.27	4515.81	3757.18	3017.39	-0.0211757	0.895103	0.989609	-
ENSMUSG00000003923_Tfam	2811.35	2497.53	2975.16	2587.9	2432.24	2495.38	-0.140342	0.23483	0.911908	-
ENSMUSG00000003929_Zfp81	475.614	433.207	439.911	425.739	416.121	512.792	0.00535467	0.96604	0.998702	-
ENSMUSG00000003934_Efnb3	90.9792	115.836	96.1992	82.731	122.922	143.295	0.201434	0.432617	0.925726	-
ENSMUSG00000003948_Mmd	135.118	157.273	158.328	148.73	100.756	143.295	-0.196546	0.329663	0.91642	-
ENSMUSG00000003949_Hlf	15.3133	25.4274	12.0249	16.7321	26.1965	11.2589	0.0369372	0.950601	0.995993	-
ENSMUSG00000003955_Fam162a	1251.19	906.909	1189.46	1174.04	1007.56	944.725	-0.0984667	0.60985	0.957261	-
ENSMUSG00000003970_Rpl8	44642	38498	41946.9	44569.7	37994	33871.9	-0.103385	0.413258	0.920917	-
ENSMUSG00000003992_Ssbp2	44.1384	43.3207	38.0789	47.4076	43.325	23.5414	-0.132906	0.693199	0.969793	-
ENSMUSG00000004018_Fancl	388.238	324.905	343.712	327.206	330.479	309.108	-0.1289	0.334135	0.91642	-
ENSMUSG00000004032_Gstm5	285.549	242.972	258.535	253.77	242.821	211.872	-0.151503	0.412976	0.920917	-
ENSMUSG00000004035_Gstm7	33.329	24.4856	44.0913	39.0416	31.2343	42.9886	0.157089	0.576182	0.948526	-
ENSMUSG00000004040_Stat3	2852.78	3521.22	3457.16	3161.44	3335.01	3339.8	0.000880228	0.992384	0.999082	-
ENSMUSG00000004043_Stat5a	63.9557	49.913	54.1121	56.7032	65.4912	62.4358	0.134895	0.68804	0.968771	-
ENSMUSG00000004044_Ptrf	703.512	872.064	1050.18	613.51	663.98	910.948	-0.26282	0.267864	0.911908	-
ENSMUSG00000004054_Map3k11	532.363	679.946	581.204	576.328	632.746	700.1	0.0899268	0.583206	0.950093	-
ENSMUSG00000004056_Akt2	1655.64	1595.33	1645.41	1664.84	1786.4	1517.91	0.0214277	0.748979	0.975341	-
ENSMUSG00000004069_Dnaja3	2415	2241.37	2314.79	2427.08	2284.13	1939.6	-0.0676027	0.466219	0.928648	-
ENSMUSG00000004070_Hmox2	637.755	593.305	622.289	633.031	649.874	493.345	-0.0609405	0.684682	0.968738	-
ENSMUSG00000004071_5730403B10Rik	897.181	1131.99	1007.09	1009.5	1005.54	1064.48	0.0206477	0.808385	0.98406	-
ENSMUSG00000004085_B230120H23Rik	1090.85	1119.75	1197.48	1214.94	1227.2	1284.54	0.129292	0.0547633	0.852786	-
ENSMUSG00000004096_Cwc15	2070.9	1972.03	2013.17	2080.36	1961.71	1636.64	-0.0926555	0.488664	0.934884	-
ENSMUSG00000004098_Col5a3	137.82	114.894	107.222	100.393	98.7406	131.013	-0.126624	0.620081	0.959615	-
ENSMUSG00000004099_Dnmt1	6281.17	6984.99	5415.22	6603.6	7341.06	5597.73	0.0649598	0.544988	0.942187	-
ENSMUSG00000004100_Ppan	2230.34	2441.03	2275.71	2410.35	2523.93	2403.27	0.0788707	0.244611	0.911908	-
ENSMUSG00000004105_Angptl2	121.606	129.02	131.272	131.998	126.952	140.225	0.0641978	0.724105	0.972048	-
ENSMUSG00000004110_Cacna1e	63.0549	52.7382	36.0747	74.3649	49.3703	49.1298	0.186205	0.549421	0.942317	-
ENSMUSG00000004113_Cacna1b	53.1463	65.9228	58.1204	64.1397	86.6499	106.448	0.535228	0.0314131	0.778437	-
ENSMUSG00000004127_Rg9mtd2	826.92	800.491	746.546	891.449	806.046	685.77	0.00607221	0.956961	0.996944	-
ENSMUSG00000004151_Etv1	665.679	808.025	733.519	701.819	780.857	747.182	0.0146702	0.892996	0.989538	-
ENSMUSG00000004187_Kifc2	110.796	50.8547	71.1474	67.858	87.6575	110.542	0.189505	0.576305	0.948526	-
ENSMUSG00000004207_Psap	5405.6	5272.88	5768.95	5329.17	4919.9	5834.16	-0.0322649	0.666239	0.96667	-
ENSMUSG00000004221_Ikbkg	679.191	654.519	660.368	632.102	603.527	752.3	-0.00507645	0.962094	0.998033	-
ENSMUSG00000004233_Wars2	245.914	258.041	291.604	255.629	264.988	211.872	-0.117277	0.411764	0.920917	-
ENSMUSG00000004263_Atn1	80.1698	132.787	111.23	116.195	150.126	227.225	0.605982	0.0778851	0.911908	-
ENSMUSG00000004264_Phb2	7331.48	7314.6	6080.59	7091.62	7203.03	5667.33	-0.0542443	0.69101	0.969745	-
ENSMUSG00000004266_Ptpn6	268.434	267.458	218.452	236.109	221.663	190.378	-0.218955	0.138104	0.911908	-
ENSMUSG00000004267_Eno2	57.6502	59.3305	109.226	47.4076	63.4761	88.0242	-0.185053	0.581792	0.949913	-
ENSMUSG00000004268_Emg1	5331.74	4591.99	4868.08	4981.52	4552.14	3698.04	-0.160735	0.267051	0.911908	-
ENSMUSG00000004270_Lpcat3	634.152	681.83	745.544	662.777	699.245	650.97	-0.0337382	0.758096	0.978037	-
ENSMUSG00000004285_Atp6v1f	1360.18	1217.69	1450	1353.44	1170.78	969.29	-0.20474	0.128214	0.911908	-
ENSMUSG00000004317_Clcn5	533.264	465.226	489.013	542.864	455.416	529.169	0.0382858	0.729738	0.97234	-
ENSMUSG00000004319_Clcn3	3014.02	2886.48	3391.02	2982.96	3043.83	3673.48	0.0620935	0.600366	0.95544	-
ENSMUSG00000004328_Hif3a	58.551	83.8161	66.137	92.9561	70.529	82.9065	0.242429	0.38103	0.91642	-
ENSMUSG00000004341_Gpx6	16.2141	15.0681	12.0249	15.8025	13.0982	12.2824	-0.0728101	0.877087	0.988766	-
ENSMUSG00000004356_Utp20	10753.6	11180.5	9111.87	11206.8	11261.5	10125.9	0.07017	0.469826	0.929908	-
ENSMUSG00000004359_Spic	2.70235	11.301	8.0166	32.5346	18.136	11.2589	1.50218	0.0228902	0.700331	-
ENSMUSG00000004360_9330159F19Rik	47.7416	90.4084	24.0498	67.858	112.846	45.0356	0.474697	0.238169	0.911908	-
ENSMUSG00000004364_Cul3	5859.6	5780.48	5894.21	5960.35	5531.49	5376.64	-0.0557386	0.478256	0.932201	-
ENSMUSG00000004383_Large	389.139	467.11	483	461.062	479.597	665.299	0.261931	0.192755	0.911908	-
ENSMUSG00000004393_Ddx56	2814.95	2626.55	2463.1	2699.45	2470.53	2400.2	-0.0623773	0.438426	0.925726	-
ENSMUSG00000004394_Tmed4	484.622	482.178	480.996	423.88	432.242	493.345	-0.102622	0.254735	0.911908	-
ENSMUSG00000004415_Emid2	64.8565	27.3109	68.1411	40.9007	30.2267	38.8944	-0.541037	0.116282	0.911908	-
ENSMUSG00000004446_Bid	482.82	516.081	497.029	501.034	540.051	457.521	0.00301813	0.973309	0.999082	-
ENSMUSG00000004451_Ralb	1565.56	1340.12	1598.31	1478.93	1401.51	1392.01	-0.0759051	0.465471	0.928648	-
ENSMUSG00000004455_Ppp1cc	11598.5	10148.3	11396.6	10252.1	9428.72	9577.24	-0.17986	0.0744079	0.908901	-
ENSMUSG00000004460_Dnajb11	1711.49	1663.14	1832.8	1705.74	1731.99	1590.58	-0.0500465	0.49261	0.935767	-
ENSMUSG00000004462_Tbccd1	443.186	428.498	401.832	525.202	487.658	383.827	0.134018	0.238136	0.911908	-
ENSMUSG00000004473_Clec11a	45.94	32.0196	53.11	50.1963	59.4459	63.4593	0.40145	0.142153	0.911908	-
ENSMUSG00000004500_Zfp324	249.517	274.05	284.589	327.206	274.056	298.873	0.157595	0.202254	0.911908	-
ENSMUSG00000004530_Coro1c	3440.09	3449.64	3142.51	3576.95	3366.25	2978.49	-0.0159205	0.871993	0.988089	-
ENSMUSG00000004535_Tax1bp1	5710.97	5153.28	5696.8	5480.69	5118.39	4778.9	-0.106826	0.25685	0.911908	-
ENSMUSG00000004558_Ndrg2	87.3761	108.302	168.349	87.3788	81.6121	129.989	-0.283041	0.379051	0.91642	-
ENSMUSG00000004561_Mettl17	152.233	172.341	169.351	173.828	202.519	199.59	0.221358	0.232	0.911908	-
ENSMUSG00000004562_Arhgef40	49.5431	64.0393	40.083	46.4781	56.4232	62.4358	0.100396	0.687381	0.968771	-
ENSMUSG00000004565_Pnpla6	1474.58	1480.44	1196.48	1431.52	1515.37	1406.34	0.0679649	0.520619	0.939947	-
ENSMUSG00000004567_Mcoln1	266.632	270.283	277.575	284.446	276.071	344.932	0.152008	0.197936	0.911908	-
ENSMUSG00000004568_Arhgef18	1243.98	1263.83	1050.18	1534.71	1635.27	1806.54	0.483645	0.000375175	0.0887581	-
ENSMUSG00000004591_Pkn2	4848.02	4590.11	5113.59	4860.68	4585.39	4564.98	-0.0544643	0.480731	0.932934	-
ENSMUSG00000004610_Etfb	1534.94	1411.69	1311.72	1440.82	1505.29	935.513	-0.133546	0.48501	0.934815	-
ENSMUSG00000004626_Stxbp2	687.298	682.772	746.546	628.383	632.746	723.641	-0.0928812	0.38784	0.91642	-
ENSMUSG00000004630_Pcp2	19.8172	32.0196	12.0249	13.9434	15.1134	23.5414	-0.284862	0.610797	0.95795	-
ENSMUSG00000004631_Sgce	204.478	159.156	235.488	179.405	169.27	192.425	-0.146288	0.471627	0.930641	-
ENSMUSG00000004633_Chn2	144.125	114.894	116.241	91.097	91.6877	89.0478	-0.466979	0.00797148	0.480861	-
ENSMUSG00000004637_Wwox	298.16	253.332	303.629	324.417	316.373	455.474	0.357993	0.0965584	0.911908	-
ENSMUSG00000004642_Slbp	4079.65	3615.39	4133.56	3787.96	3671.54	3429.87	-0.119278	0.293547	0.911908	-
ENSMUSG00000004661_Arid3b	702.612	916.326	652.351	806.859	892.696	772.771	0.12212	0.41074	0.920517	-
ENSMUSG00000004665_Cnn2	1062.02	1237.46	1286.66	1051.33	1147.61	1112.59	-0.11468	0.272593	0.911908	-
ENSMUSG00000004667_Polr2e	3186.97	3087.07	3025.27	2971.81	3061.97	2613.09	-0.104909	0.275644	0.911908	-
ENSMUSG00000004668_Abca13	75.6659	75.3403	46.0955	72.5058	49.3703	45.0356	-0.238953	0.349306	0.91642	-
ENSMUSG00000004677_Myo9b	985.458	1135.76	998.067	1020.66	1131.49	1265.09	0.131229	0.290286	0.911908	-
ENSMUSG00000004748_Mtfp1	259.426	210.011	233.484	251.911	233.753	214.943	-0.00438426	0.975838	0.999082	-
ENSMUSG00000004768_Rab23	1187.23	1355.18	1123.33	1282.79	1328.97	1449.33	0.147281	0.131198	0.911908	-
ENSMUSG00000004771_Rab11a	1145.8	1002.97	1296.69	1050.4	945.089	1008.18	-0.197407	0.079954	0.911908	-
ENSMUSG00000004788_Eif2b2	1497.1	1403.21	1285.66	1392.48	1368.26	1166.83	-0.0919495	0.409879	0.920222	-
ENSMUSG00000004789_Dlst	2029.47	1917.41	1955.05	2019.94	1917.38	1901.73	-0.0152986	0.800744	0.983957	-
ENSMUSG00000004791_Pgf	13.5118	10.3593	10.0208	10.2252	8.06046	8.1883	-0.356334	0.469087	0.929396	-
ENSMUSG00000004798_Ulk2	92.7808	77.2238	125.259	81.8014	89.6726	100.307	-0.118299	0.590659	0.952587	-
ENSMUSG00000004815_Dgkq	425.17	353.158	397.824	424.81	383.879	532.239	0.188736	0.312711	0.914577	-
ENSMUSG00000004843_Chmp2b	553.982	500.071	526.09	541.005	428.212	421.697	-0.182912	0.148104	0.911908	-
ENSMUSG00000004846_Plod3	1038.6	1073.6	1002.08	963.955	942.066	1017.4	-0.0915593	0.293378	0.911908	-
ENSMUSG00000004849_Ap1s1	1092.65	1058.53	907.88	986.265	947.104	772.771	-0.176815	0.210976	0.911908	-
ENSMUSG00000004864_Mapk13	71.1619	69.6898	80.166	54.8441	72.5441	71.6476	-0.152627	0.523105	0.939947	-
ENSMUSG00000004865_Srpk1	3517.56	4000.57	3695.65	3615.99	4058.44	3474.91	-0.0082947	0.914125	0.991377	-
ENSMUSG00000004880_Lbr	9655.5	9062.5	9981.67	9103.19	9245.34	9260.97	-0.0558488	0.391716	0.91642	-
ENSMUSG00000004885_Crabp2	194.569	151.622	110.228	118.984	109.824	92.1184	-0.509466	0.018111	0.664481	-
ENSMUSG00000004891_Nes	807.102	952.113	838.737	590.271	781.864	707.264	-0.321597	0.052446	0.849289	-
ENSMUSG00000004895_Prcc	1770.94	1924.94	1822.78	1835.88	1976.83	1683.72	-0.00575217	0.958808	0.996944	-
ENSMUSG00000004896_Rrnad1	590.914	561.285	629.303	634.89	634.761	847.489	0.248795	0.13418	0.911908	-
ENSMUSG00000004897_Hdgf	8685.36	10344.2	9121.89	9594	10472.5	8153.5	0.00352983	0.979101	0.999082	-
ENSMUSG00000004902_Slc25a18	9.00784	16.9516	12.0249	12.0843	10.0756	21.4943	0.198963	0.710859	0.97056	-
ENSMUSG00000004929_Thop1	3014.02	3034.33	2597.38	3076.85	3068.01	2518.93	0.00299876	0.980931	0.999082	-
ENSMUSG00000004931_Apba3	594.517	569.761	584.21	594.919	508.816	596.722	-0.0399521	0.714923	0.971181	-
ENSMUSG00000004933_Matk	34.2298	45.2042	32.0664	34.3938	39.2947	39.918	0.0247075	0.937777	0.995612	-
ENSMUSG00000004934_Pias4	1043.11	1088.67	1005.08	1073.64	952.141	942.678	-0.0791866	0.389852	0.91642	-
ENSMUSG00000004936_Map2k1	3632.86	3176.54	3469.19	3378.96	3167.76	2965.19	-0.111707	0.195322	0.911908	-
ENSMUSG00000004937_Sgta	1402.52	1551.07	1476.06	1502.17	1507.31	1333.67	-0.0281574	0.775201	0.98095	-
ENSMUSG00000004945_5730437N04Rik	1095.35	890.899	996.063	933.28	855.416	742.065	-0.236621	0.11028	0.911908	-
ENSMUSG00000004947_Dtx2	365.718	470.877	391.811	417.373	442.318	404.297	0.0412918	0.808176	0.98406	-
ENSMUSG00000004951_Hspb1	6359.54	7577.35	5224.82	7044.22	7176.83	4756.38	-0.0139368	0.947591	0.995993	-
ENSMUSG00000004952_Rasa4	269.334	321.138	321.666	224.024	228.715	263.049	-0.349681	0.0300902	0.765812	-
ENSMUSG00000004980_Hnrnpa2b1	12500.2	12568.6	12414.7	13389.4	13631.2	11450.3	0.0375571	0.613422	0.958643	-
ENSMUSG00000004994_Ccdc130	103.59	113.952	144.299	132.927	144.081	122.824	0.146772	0.446729	0.926853	-
ENSMUSG00000004996_Mri1	662.076	602.722	627.299	581.905	624.685	629.476	-0.0443047	0.61411	0.958905	-
ENSMUSG00000005034_Prkacb	1026.89	1082.08	1156.4	1123.84	1050.88	1016.37	-0.0324653	0.739822	0.973064	-
ENSMUSG00000005043_Sgsh	51.3447	48.9712	51.1058	45.5485	37.2796	62.4358	-0.0618479	0.806724	0.98406	-
ENSMUSG00000005045_Chd5	378.329	431.323	437.907	369.965	354.66	450.356	-0.0864771	0.657163	0.965734	-
ENSMUSG00000005054_Cstb	388.238	409.663	511.058	379.261	333.501	427.839	-0.197897	0.222044	0.911908	-
ENSMUSG00000005057_Sh2b2	21.6188	21.6603	11.0228	13.0139	25.1889	20.4707	0.101156	0.819659	0.984897	-
ENSMUSG00000005069_Pex5	1591.69	1542.59	1509.13	1560.73	1456.93	1367.45	-0.0822792	0.282951	0.911908	-
ENSMUSG00000005078_Jkamp	534.165	392.711	427.886	462.922	444.333	446.262	-0.00226196	0.984469	0.999082	-
ENSMUSG00000005087_Cd44	39.6345	23.5438	23.0477	25.0982	31.2343	24.5649	-0.0963376	0.816945	0.984399	-
ENSMUSG00000005102_Eif2ak4	686.397	730.801	741.536	651.622	706.298	776.865	-0.0165772	0.856494	0.985753	-
ENSMUSG00000005103_Wdr1	4215.67	4435.66	5065.49	4033.37	4162.22	4669.38	-0.0924526	0.362066	0.91642	-
ENSMUSG00000005125_Ndrg1	138.721	103.593	73.1515	116.195	125.945	57.3181	-0.0755453	0.852822	0.9853	-
ENSMUSG00000005131_4930550C14Rik	29.7259	25.4274	23.0477	25.0982	24.1814	12.2824	-0.343229	0.456708	0.926853	-
ENSMUSG00000005142_Man2b1	969.244	1102.79	1122.32	1021.59	1103.28	1374.61	0.131475	0.365417	0.91642	-
ENSMUSG00000005148_Klf5	744.048	1115.98	1065.21	1169.39	1471.03	1883.31	0.628974	0.0216922	0.692446	-
ENSMUSG00000005150_Wdr83	428.773	379.527	390.809	450.837	422.166	448.309	0.139518	0.157434	0.911908	-
ENSMUSG00000005161_Prdx2	4370.6	4343.37	4319.95	4189.53	4214.61	3600.8	-0.118575	0.273046	0.911908	-
ENSMUSG00000005198_Polr2a	3124.82	3652.12	3450.15	4289.93	4279.1	6271.21	0.537079	0.00169927	0.229721	-
ENSMUSG00000005204_Senp3	5929.86	5920.81	5052.46	6146.26	6148.11	4963.13	0.0299238	0.787028	0.98147	-
ENSMUSG00000005225_Plekha8	1989.83	1958.85	2038.22	1887.01	1929.47	1675.53	-0.124308	0.236168	0.911908	-
ENSMUSG00000005233_Spc25	1934.88	1889.16	1995.13	1932.56	1847.86	1614.12	-0.109082	0.365298	0.91642	-
ENSMUSG00000005237_Dnahc2	51.3447	53.68	50.1038	69.7171	68.5139	65.5064	0.393399	0.0956544	0.911908	-
ENSMUSG00000005251_Ripk4	448.59	424.731	522.081	409.007	435.265	488.227	-0.0664923	0.638169	0.962307	-
ENSMUSG00000005262_Ufd1l	1042.21	1076.42	1094.27	1058.77	1088.16	1053.22	-0.00553865	0.945117	0.995993	-
ENSMUSG00000005267_Zfp287	72.0627	95.1171	81.1681	91.097	100.756	97.2361	0.219212	0.215188	0.911908	-
ENSMUSG00000005299_Letm1	617.938	587.654	517.071	615.37	577.33	596.722	0.0540342	0.579238	0.948941	-
ENSMUSG00000005312_Ubqln1	4559.77	4630.6	4287.88	4329.9	4261.97	3597.73	-0.144922	0.156442	0.911908	-
ENSMUSG00000005320_Fgfr4	19.8172	17.8933	33.0685	10.2252	10.0756	45.0356	-0.118708	0.821191	0.985	-
ENSMUSG00000005354_Txn2	1099.86	1379.67	989.048	1153.59	1333	862.842	-0.0504325	0.819221	0.984874	-
ENSMUSG00000005355_Casp14	27.0235	22.6021	19.0394	21.3799	20.1511	22.5178	-0.10379	0.795352	0.982895	-
ENSMUSG00000005360_Slc1a3	575.601	656.402	554.148	598.637	635.769	716.476	0.126314	0.24205	0.911908	-
ENSMUSG00000005362_Crbn	2147.47	1669.73	2156.47	1941.85	1736.02	1840.32	-0.114305	0.406494	0.918958	-
ENSMUSG00000005370_Msh6	21702.6	21403.2	18881.1	22879.3	22653.9	18026.5	0.0361518	0.768637	0.979591	-
ENSMUSG00000005371_Fbxo11	1066.53	1048.17	1208.5	1057.84	1166.75	1344.93	0.10305	0.432335	0.925726	-
ENSMUSG00000005373_Mlxipl	19.8172	14.1263	29.0602	15.8025	22.1663	14.3295	-0.26533	0.551839	0.942536	-
ENSMUSG00000005374_Tbl2	1130.48	1095.26	999.069	1108.04	1098.24	1079.83	0.0265887	0.724089	0.972048	-
ENSMUSG00000005378_Wbscr22	916.097	971.89	784.625	892.379	984.383	827.018	0.0164102	0.903781	0.990685	-
ENSMUSG00000005397_Nid1	3075.28	3527.81	3663.59	3156.79	3770.28	4754.33	0.186183	0.234069	0.911908	-
ENSMUSG00000005410_Mcm5	15058.4	14518.1	14004	14320.8	14300.3	11730.8	-0.111026	0.221358	0.911908	-
ENSMUSG00000005413_Hmox1	1524.13	1596.27	1347.79	1407.36	1381.36	1034.8	-0.224688	0.170621	0.911908	-
ENSMUSG00000005417_Mprip	4207.56	4007.16	3748.76	3977.59	3974.81	3740.01	-0.0331592	0.678687	0.967566	-
ENSMUSG00000005442_Cic	915.197	1257.24	1100.28	1133.14	1233.25	1729.78	0.32372	0.205062	0.911908	-
ENSMUSG00000005447_Pafah1b3	496.332	461.459	506.048	408.077	484.635	439.098	-0.136873	0.248427	0.911908	-
ENSMUSG00000005465_Il27ra	48.6423	67.8063	50.1038	48.3372	46.3476	70.6241	-0.0132422	0.960898	0.997807	-
ENSMUSG00000005469_Prkaca	685.497	688.422	701.453	824.521	794.963	696.005	0.158428	0.19405	0.911908	-
ENSMUSG00000005470_Asf1b	478.316	523.615	460.955	542.864	536.02	427.839	0.0432831	0.691158	0.969793	-
ENSMUSG00000005481_Ddx39	7775.57	7065.98	6813.11	7211.54	7029.73	5909.9	-0.103802	0.368769	0.91642	-
ENSMUSG00000005483_Dnajb1	1744.82	1807.23	1941.02	1692.73	1779.35	1663.25	-0.0969024	0.259567	0.911908	-
ENSMUSG00000005493_Msh4	31.5274	32.9614	30.0623	26.9573	34.2569	29.6826	-0.0592429	0.852553	0.9853	-
ENSMUSG00000005501_Usp40	958.434	925.744	884.833	919.336	922.922	876.148	-0.0268661	0.743651	0.97364	-
ENSMUSG00000005505_Kbtbd4	1199.84	1292.09	1228.54	1124.77	1173.8	998.973	-0.173878	0.0982788	0.911908	-
ENSMUSG00000005506_Celf1	6559.51	7361.69	6762.01	6906.64	7605.04	6762.51	0.0406379	0.596214	0.954359	-
ENSMUSG00000005510_Ndufs3	1610.6	1818.53	1709.54	1665.77	1724.94	1536.33	-0.0604341	0.484139	0.934815	-
ENSMUSG00000005514_Por	1070.13	1085.84	998.067	1117.33	1108.31	1212.89	0.124275	0.271717	0.911908	-
ENSMUSG00000005533_Igf1r	370.222	511.372	430.892	447.119	502.771	666.323	0.299886	0.0865774	0.911908	-
ENSMUSG00000005534_Insr	254.922	293.827	246.511	291.882	348.615	357.215	0.325596	0.0147269	0.625689	-
ENSMUSG00000005540_Fcer2a	12.611	13.1846	23.0477	17.6617	13.0982	24.5649	0.185256	0.674029	0.96667	-
ENSMUSG00000005553_Atp4a	31.5274	18.8351	9.01868	26.0277	20.1511	14.3295	0.0224988	0.961607	0.997922	-
ENSMUSG00000005566_Trim28	42692.7	44680.6	36881.4	42281.1	42502.8	37961	-0.0176434	0.8611	0.986427	-
ENSMUSG00000005575_Ube2m	1035.9	1130.1	951.972	957.448	1066	865.913	-0.110037	0.34644	0.91642	-
ENSMUSG00000005580_Adcy9	60.3525	51.7965	69.1432	101.322	63.4761	83.9301	0.460156	0.0615931	0.869135	-
ENSMUSG00000005609_Ctr9	3739.15	3288.6	3424.09	3708.95	3293.7	2948.81	-0.0706301	0.473628	0.930641	-
ENSMUSG00000005610_Eif4g2	24314	26183.6	24990.8	26729.5	26985.4	23923.1	0.0405287	0.629781	0.961458	-
ENSMUSG00000005615_Pcyt1a	1067.43	1020.86	966.001	1068.07	1034.76	965.196	0.00640579	0.940413	0.995612	-
ENSMUSG00000005621_Zfp592	351.306	553.751	452.938	436.894	558.187	600.816	0.23273	0.253719	0.911908	-
ENSMUSG00000005625_Psmd4	5725.38	5134.44	5493.38	5434.22	5035.77	4421.68	-0.134961	0.169467	0.911908	-
ENSMUSG00000005656_Snx6	2070	1756.37	1909.96	1879.57	1704.79	1571.13	-0.153876	0.210466	0.911908	-
ENSMUSG00000005667_Mthfd2	1893.45	1999.34	1959.06	1889.8	1859.95	1662.22	-0.112379	0.163423	0.911908	-
ENSMUSG00000005672_Kit	826.92	975.657	864.791	1049.47	1171.79	936.537	0.243569	0.151043	0.911908	-
ENSMUSG00000005674_Tomm40l	1348.47	1174.37	1157.4	1177.75	1097.23	983.619	-0.175481	0.126676	0.911908	-
ENSMUSG00000005677_Nr1i3	106.293	86.6413	85.1764	113.406	87.6575	112.589	0.172594	0.421479	0.923997	-
ENSMUSG00000005682_Pan2	942.22	1079.25	938.945	1016.94	1057.93	1038.89	0.0727574	0.574174	0.948003	-
ENSMUSG00000005683_Cs	4741.73	4967.75	4750.84	4561.36	4893.71	4292.72	-0.0728874	0.300431	0.91227	-
ENSMUSG00000005686_Ampd3	110.796	88.5249	116.241	113.406	119.899	103.377	0.0945818	0.606336	0.956754	-
ENSMUSG00000005687_Bcas2	2874.4	2670.81	2831.87	2856.54	2688.16	2383.82	-0.0791881	0.408026	0.918958	-
ENSMUSG00000005698_Ctcf	2972.59	3539.11	2980.17	3338.05	3581.87	2934.48	0.0541289	0.528078	0.941169	-
ENSMUSG00000005699_Pard6a	226.097	152.564	183.38	173.828	150.126	156.601	-0.226126	0.280847	0.911908	-
ENSMUSG00000005718_Tfap4	207.18	237.322	168.349	203.574	180.353	177.072	-0.127903	0.424036	0.924187	-
ENSMUSG00000005732_Ranbp1	5302.01	6127.05	4907.16	5331.03	5663.48	4150.44	-0.109221	0.461862	0.927736	-
ENSMUSG00000005763_Cd247	190.966	174.224	219.455	173.828	221.663	175.025	-0.0351155	0.879978	0.989266	-
ENSMUSG00000005774_Rfx5	497.233	409.663	393.816	419.232	378.841	470.827	-0.0371559	0.762982	0.979026	-
ENSMUSG00000005779_Psmb4	8933.98	7238.32	7937.44	8274.95	6924.94	6276.33	-0.166833	0.244146	0.911908	-
ENSMUSG00000005802_Slc30a4	204.478	235.438	174.361	204.503	262.972	200.613	0.119388	0.445247	0.926853	-
ENSMUSG00000005804_Pldn	822.416	737.393	812.683	784.55	756.675	655.064	-0.110741	0.292769	0.911908	-
ENSMUSG00000005813_Metap1	2706.86	2652.92	2836.88	2544.21	2429.22	2259.97	-0.180179	0.0952591	0.911908	-
ENSMUSG00000005823_Gpr108	223.394	243.914	246.511	230.531	237.783	289.661	0.0861731	0.598345	0.954973	-
ENSMUSG00000005836_Gata6	64.8565	50.8547	32.0664	54.8441	57.4308	50.1533	0.132692	0.697233	0.969793	-
ENSMUSG00000005846_Rsl1d1	7671.98	7594.3	7469.47	7681.89	7489.17	6422.7	-0.0742893	0.43245	0.925726	-
ENSMUSG00000005871_Apc	2977.09	3472.25	3067.35	3433.8	3790.43	3578.29	0.182773	0.0501667	0.845431	-
ENSMUSG00000005873_Reep5	228.799	209.069	294.61	224.024	203.527	233.367	-0.146497	0.339365	0.91642	-
ENSMUSG00000005881_Ergic3	889.975	954.938	996.063	847.76	923.93	920.16	-0.0777262	0.376043	0.91642	-
ENSMUSG00000005882_Uqcc	818.813	808.967	878.82	791.057	823.174	832.136	-0.0349904	0.723176	0.972048	-
ENSMUSG00000005886_Ncoa2	823.317	929.511	877.818	893.308	971.285	897.642	0.0705055	0.38362	0.91642	-
ENSMUSG00000005892_Trh	384.635	291.944	302.627	451.767	436.272	399.18	0.393686	0.00246975	0.292144	-
ENSMUSG00000005893_Nr2c2	1139.49	1393.8	1454.01	1119.19	1331.99	1771.74	0.0827049	0.632016	0.961478	-
ENSMUSG00000005897_Nr2c1	135.118	141.263	130.27	118.054	131.99	110.542	-0.173961	0.252611	0.911908	-
ENSMUSG00000005899_Smpd4	1997.94	2328.96	1669.46	1989.26	2387.91	1984.64	0.085105	0.528568	0.941169	-
ENSMUSG00000005907_Pex1	436.88	404.012	460.955	520.554	474.559	563.969	0.260383	0.0322103	0.782064	-
ENSMUSG00000005936_Kctd20	2634.79	2703.78	2739.67	2713.39	2596.47	2538.37	-0.0414399	0.584896	0.950093	-
ENSMUSG00000005947_Itgae	48.6423	49.913	53.11	40.9007	47.3552	53.2239	-0.101918	0.697853	0.969793	-
ENSMUSG00000005949_Ctns	175.653	176.108	173.359	172.898	151.134	213.919	0.0336602	0.815998	0.98426	-
ENSMUSG00000005950_P2rx5	29.7259	26.3691	32.0664	37.1825	22.1663	42.9886	0.216726	0.504574	0.93752	-
ENSMUSG00000005951_Shpk	31.5274	28.2526	32.0664	26.0277	28.2116	12.2824	-0.462425	0.315798	0.916111	-
ENSMUSG00000005958_Ephb3	543.173	838.161	752.559	514.047	687.154	769.7	-0.114813	0.573801	0.948003	-
ENSMUSG00000005968_Tuft1	193.669	186.467	223.463	163.603	164.232	230.296	-0.113495	0.563464	0.946403	-
ENSMUSG00000005973_Rcn1	2054.69	1967.32	2366.9	1907.46	2010.08	1940.63	-0.124867	0.156143	0.911908	-
ENSMUSG00000005980_Dnase1	63.9557	77.2238	61.1266	68.7875	93.7028	94.1654	0.34152	0.267749	0.911908	-
ENSMUSG00000005981_Trap1	4696.69	4692.76	4087.47	4697.07	4722.42	3875.11	-0.0196556	0.857263	0.985933	-
ENSMUSG00000005982_Nat15	293.656	362.575	307.637	277.939	338.539	334.697	-0.0198892	0.902255	0.990685	-
ENSMUSG00000005983_1700037C18Rik	47.7416	48.0294	46.0955	52.0554	53.4005	69.6005	0.3005	0.214239	0.911908	-
ENSMUSG00000005986_Ankrd13d	65.7572	52.7382	37.0768	61.351	57.4308	48.1063	0.0976227	0.698845	0.969793	-
ENSMUSG00000006005_Tpr	16135.7	17333.9	17603.5	18343	18522.9	17611	0.0931112	0.27016	0.911908	-
ENSMUSG00000006010_BC003331	1323.25	1001.08	1149.38	1123.84	1083.12	1091.09	-0.0750381	0.534378	0.941169	-
ENSMUSG00000006014_Prg4	27.9243	20.7186	37.0768	28.8164	44.3325	40.9415	0.412847	0.254007	0.911908	-
ENSMUSG00000006019_Dhx34	198.172	257.099	234.486	270.502	289.169	326.508	0.361532	0.0476273	0.835602	-
ENSMUSG00000006021_Kptn	311.671	275.934	311.645	275.15	322.418	320.367	0.0287605	0.834742	0.9853	-
ENSMUSG00000006024_Napa	1357.48	1426.76	1365.83	1511.47	1463.98	1386.89	0.0722137	0.393463	0.916951	-
ENSMUSG00000006050_Sra1	1256.59	1152.71	1241.57	1156.37	1130.48	1076.76	-0.11807	0.262183	0.911908	-
ENSMUSG00000006056_Calcoco2	817.912	646.985	638.322	847.76	628.716	636.64	0.00693976	0.967535	0.998702	-
ENSMUSG00000006057_Atp5g1	4510.23	4477.1	3988.26	4545.55	4394.96	3146.35	-0.102309	0.519866	0.939947	-
ENSMUSG00000006058_Snf8	892.677	839.103	759.573	858.915	804.031	611.052	-0.131432	0.34563	0.91642	-
ENSMUSG00000006095_Tbcb	1476.39	1341.06	1298.69	1475.21	1357.18	1045.03	-0.0860127	0.574515	0.948003	-
ENSMUSG00000006127_Inpp5k	474.713	493.479	530.098	478.724	535.013	671.441	0.169233	0.313147	0.91479	-
ENSMUSG00000006134_Crkl	2372.67	2566.28	2524.23	2471.7	2601.51	2397.12	0.00148755	0.986149	0.999082	-
ENSMUSG00000006169_Clint1	1464.67	1589.68	1537.18	1596.99	1690.68	1585.46	0.0859625	0.242066	0.911908	-
ENSMUSG00000006179_Prss16	18.0157	19.7768	21.0436	21.3799	28.2116	24.5649	0.333405	0.323622	0.91642	-
ENSMUSG00000006191_Cdkal1	748.552	802.374	932.932	899.815	835.265	844.418	0.0552962	0.658926	0.966165	-
ENSMUSG00000006200_Rhox6	54.9478	52.7382	41.0851	65.0693	49.3703	15.3531	-0.193334	0.623451	0.960183	-
ENSMUSG00000006205_Htra1	904.387	703.49	909.884	940.716	772.796	907.878	0.0585131	0.656312	0.965734	-
ENSMUSG00000006215_Zbtb17	786.384	755.287	739.532	771.536	639.799	853.63	-0.010543	0.925321	0.993321	-
ENSMUSG00000006218_Fam131c	39.6345	61.214	54.1121	44.6189	22.1663	48.1063	-0.428838	0.204698	0.911908	-
ENSMUSG00000006219_Fblim1	1972.72	2478.7	1948.03	2441.96	2815.11	2200.61	0.220751	0.114729	0.911908	-
ENSMUSG00000006241_Ccdc159	17.1149	25.4274	24.0498	20.4503	31.2343	36.8473	0.408688	0.239084	0.911908	-
ENSMUSG00000006262_Mob1b	844.035	858.879	1184.45	873.788	971.285	1273.28	0.111089	0.611074	0.95795	-
ENSMUSG00000006273_Atp6v1b2	3229.31	3254.7	3005.22	3359.43	3114.36	2635.61	-0.0588205	0.602755	0.95568	-
ENSMUSG00000006276_Eps15l1	706.215	857.938	729.511	825.45	888.665	787.1	0.125012	0.258503	0.911908	-
ENSMUSG00000006281_Tep1	308.068	321.138	360.747	327.206	384.887	402.25	0.170685	0.343829	0.91642	-
ENSMUSG00000006288_Ttc5	693.604	620.616	633.312	603.285	629.723	564.993	-0.115584	0.217933	0.911908	-
ENSMUSG00000006289_Osgep	263.029	249.565	283.587	283.516	227.708	326.508	0.07366	0.664556	0.966626	-
ENSMUSG00000006299_Aamp	5501.99	5074.17	5534.46	5593.17	5034.76	4674.5	-0.0740891	0.400802	0.918958	-
ENSMUSG00000006301_Tmbim1	483.721	511.372	542.123	527.061	502.771	790.171	0.243418	0.251384	0.911908	-
ENSMUSG00000006304_Arpc2	2857.29	2743.33	3312.86	2678.07	2672.04	2557.82	-0.172425	0.0678095	0.888921	-
ENSMUSG00000006307_Wbp7	1083.64	1430.52	1140.36	1280.94	1607.05	2415.55	0.537179	0.105401	0.911908	-
ENSMUSG00000006310_Zbtb32	245.013	200.594	240.498	188.701	188.413	256.908	-0.114921	0.542978	0.942137	-
ENSMUSG00000006315_Tmem147	637.755	551.868	596.235	524.273	499.748	473.898	-0.253449	0.0328037	0.787957	-
ENSMUSG00000006333_Rps9	25637.2	21801.6	24410.6	24134.2	21623.2	19226.1	-0.144884	0.244142	0.911908	-
ENSMUSG00000006335_Tfpt	455.797	456.751	536.11	506.611	441.31	452.404	-0.0474939	0.702566	0.969793	-
ENSMUSG00000006342_Susd2	177.454	186.467	191.396	171.039	212.595	262.026	0.215993	0.233162	0.911908	-
ENSMUSG00000006344_Ggt5	16.2141	16.0098	10.0208	15.8025	5.03779	6.14122	-0.638046	0.291467	0.911908	-
ENSMUSG00000006345_Ggt1	75.6659	55.5635	111.23	61.351	64.4837	95.189	-0.132781	0.612716	0.958282	-
ENSMUSG00000006356_Crip2	690.901	792.015	705.461	622.806	698.237	557.828	-0.219884	0.0622838	0.872318	-
ENSMUSG00000006360_Crip1	98.1855	80.0491	140.291	93.8857	87.6575	111.566	-0.117949	0.607782	0.956754	-
ENSMUSG00000006369_Fbln1	370.222	390.828	362.751	370.895	343.577	396.109	-0.0172761	0.90469	0.990685	-
ENSMUSG00000006373_Pgrmc1	2533	2168.86	2266.69	2103.6	2045.34	1788.12	-0.231075	0.0902031	0.911908	-
ENSMUSG00000006378_Gcat	1071.93	1169.66	1029.13	1118.26	1035.77	945.749	-0.0771718	0.487443	0.934815	-
ENSMUSG00000006386_Tek	448.59	268.4	277.575	460.133	328.464	306.038	0.138221	0.614558	0.958934	-
ENSMUSG00000006390_Elovl1	172.951	164.807	169.351	150.589	148.111	168.884	-0.11811	0.395666	0.917359	-
ENSMUSG00000006392_Med8	1448.46	1298.68	1401.9	1276.29	1210.08	1186.28	-0.175704	0.0217055	0.692446	-
ENSMUSG00000006395_Hyi	36.0314	24.4856	43.0892	39.0416	32.2418	50.1533	0.230169	0.517428	0.939619	-
ENSMUSG00000006398_Cdc20	9391.57	10343.3	8444.49	10175	10539	7887.38	0.0214542	0.881574	0.989266	-
ENSMUSG00000006403_Adamts4	93.6815	97.0006	80.166	59.4919	76.5743	79.8359	-0.331199	0.134746	0.911908	-
ENSMUSG00000006411_Pvrl4	43.2376	45.2042	48.0996	36.2529	20.1511	38.8944	-0.516102	0.0806794	0.911908	-
ENSMUSG00000006412_Pfdn2	748.552	751.52	710.471	782.691	789.925	665.299	0.0179893	0.859776	0.986427	-
ENSMUSG00000006418_Rnf114	1664.65	1868.44	1715.55	1578.4	1614.11	1615.14	-0.126647	0.122931	0.911908	-
ENSMUSG00000006423_C330007P06Rik	1189.94	1007.68	1058.19	1197.27	1070.03	1011.25	0.0102044	0.926143	0.993381	-
ENSMUSG00000006435_Neurl1a	421.567	412.488	449.932	353.233	333.501	426.815	-0.205611	0.274105	0.911908	-
ENSMUSG00000006442_Srm	1240.38	1434.29	1026.13	1373.89	1514.36	1022.51	0.079565	0.664582	0.966626	-
ENSMUSG00000006445_Epha2	10433.8	12628	11274.4	10511.5	11993	14067.5	0.0909763	0.480137	0.932563	-
ENSMUSG00000006456_Rbm14	2709.56	3038.1	2612.41	3190.25	3574.81	3992.82	0.363641	0.0033617	0.334865	-
ENSMUSG00000006457_Actn3	195.47	197.768	124.257	213.799	185.391	147.389	0.0784315	0.73871	0.973064	-
ENSMUSG00000006463_Zdhhc24	144.125	139.38	152.315	151.518	150.126	189.354	0.171394	0.346949	0.91642	-
ENSMUSG00000006464_Bbs1	114.4	143.147	141.293	136.646	158.186	164.79	0.204798	0.189249	0.911908	-
ENSMUSG00000006469_Slc34a3	26.1227	27.3109	34.0706	30.6755	35.2645	31.7297	0.15998	0.697084	0.969793	-
ENSMUSG00000006471_Ndor1	930.51	1135.76	1080.24	919.336	1156.68	1706.24	0.26532	0.268664	0.911908	-
ENSMUSG00000006476_Nelf	72.0627	67.8063	76.1577	73.4353	75.5668	63.4593	-0.0222664	0.913894	0.99135	-
ENSMUSG00000006494_Pdk1	3653.58	3569.25	4383.08	3495.15	3441.82	4469.79	-0.0249625	0.86628	0.986981	-
ENSMUSG00000006498_Ptbp1	8436.74	11027.9	8474.55	9588.42	10704.3	8247.66	0.0307152	0.847741	0.9853	-
ENSMUSG00000006517_Mvd	846.737	773.18	791.64	773.395	696.222	706.241	-0.148078	0.10148	0.911908	-
ENSMUSG00000006519_Cyba	198.172	161.04	217.45	162.673	143.073	189.354	-0.219801	0.307284	0.91276	-
ENSMUSG00000006526_Tmem110	407.154	354.099	338.701	333.713	335.517	338.791	-0.127483	0.238177	0.911908	-
ENSMUSG00000006527_Sfmbt1	377.429	443.566	399.828	463.851	461.461	413.509	0.134091	0.176489	0.911908	-
ENSMUSG00000006538_Ihh	18.9165	16.9516	25.0519	20.4503	15.1134	18.4237	-0.166704	0.636661	0.962307	-
ENSMUSG00000006567_Atp7b	144.125	136.554	108.224	107.829	139.043	144.319	0.00436934	0.981972	0.999082	-
ENSMUSG00000006575_Rundc3a	395.444	509.489	875.814	360.67	496.726	801.43	-0.102288	0.818653	0.984802	-
ENSMUSG00000006576_Slc4a3	395.444	407.779	414.859	381.12	385.894	407.368	-0.0527329	0.758585	0.978037	-
ENSMUSG00000006585_Cdt1	2148.37	2847.86	1998.14	2271.85	2591.44	2251.78	0.0245917	0.875288	0.988645	-
ENSMUSG00000006586_Runx1t1	59.4517	78.1656	27.056	74.3649	87.6575	20.4707	0.147709	0.736449	0.973064	-
ENSMUSG00000006587_Snai3	26.1227	32.0196	30.0623	26.9573	36.2721	21.4943	-0.0566567	0.856956	0.985863	-
ENSMUSG00000006589_Aprt	3011.32	2969.35	2532.24	2973.67	2782.87	2197.53	-0.0979205	0.533178	0.941169	-
ENSMUSG00000006599_Gtf2h1	3000.51	2918.5	2871.95	2833.3	2636.78	2430.9	-0.15387	0.143783	0.911908	-
ENSMUSG00000006611_Hfe	14.4125	17.8933	28.0581	21.3799	22.1663	11.2589	-0.129808	0.770572	0.979625	-
ENSMUSG00000006638_Abhd1	56.7494	40.4954	37.0768	30.6755	36.2721	39.918	-0.337163	0.226804	0.911908	-
ENSMUSG00000006641_Slc5a6	492.729	510.431	464.963	537.286	560.202	519.957	0.139406	0.202764	0.911908	-
ENSMUSG00000006649_Nphs1	90.9792	78.1656	69.1432	69.7171	99.7482	99.2831	0.169133	0.484712	0.934815	-
ENSMUSG00000006651_Aplp1	114.4	120.544	133.276	118.054	120.907	137.154	0.0308398	0.887084	0.989266	-
ENSMUSG00000006673_Qrich1	4185.94	4468.62	4070.43	4272.26	4441.31	4090.06	0.00884084	0.886634	0.989266	-
ENSMUSG00000006675_P4htm	62.1541	76.2821	83.1723	88.3083	94.7104	82.9065	0.26556	0.239728	0.911908	-
ENSMUSG00000006676_Usp19	2714.96	3080.48	2607.4	2707.81	3153.65	3436.02	0.145765	0.250402	0.911908	-
ENSMUSG00000006678_Pola1	4413.84	4168.2	3884.04	4593.89	4142.07	3388.93	-0.0399631	0.748074	0.975222	-
ENSMUSG00000006699_Cdc42	8691.67	8119.8	8591.79	7941.24	7393.45	6553.71	-0.214785	0.0539791	0.850451	-
ENSMUSG00000006705_Pknox1	451.293	553.751	462.959	453.626	473.552	530.192	-0.0111969	0.921169	0.99319	-
ENSMUSG00000006715_Gmnn	1813.28	1615.11	1818.77	1786.62	1723.93	1335.72	-0.114414	0.415378	0.921883	-
ENSMUSG00000006717_Acot13	330.588	277.817	367.762	314.192	282.116	265.096	-0.17923	0.289408	0.911908	-
ENSMUSG00000006720_Zfp184	296.358	305.128	271.562	279.798	290.176	247.696	-0.0947444	0.402255	0.918958	-
ENSMUSG00000006728_Cdk4	6582.93	6540.48	5658.72	6814.61	6864.49	5315.23	0.0162114	0.903348	0.990685	-
ENSMUSG00000006731_B4galnt1	42.3368	67.8063	43.0892	47.4076	57.4308	29.6826	-0.186744	0.552435	0.942757	-
ENSMUSG00000006732_Mettl1	383.734	391.77	332.689	382.05	417.129	355.167	0.0578415	0.599586	0.95544	-
ENSMUSG00000006736_Tspan31	781.881	824.976	816.691	713.903	736.524	711.358	-0.164758	0.0742173	0.908901	-
ENSMUSG00000006740_Kif5b	12538.9	11399.9	12667.2	12121.5	11670.5	11403.2	-0.0566694	0.501402	0.93752	-
ENSMUSG00000006763_Saal1	963.839	827.802	975.019	843.112	773.804	756.394	-0.220698	0.0354575	0.802485	-
ENSMUSG00000006764_Tph2	40.5353	27.3109	12.0249	32.5346	20.1511	5.11769	-0.463923	0.395699	0.917359	-
ENSMUSG00000006782_Cnp	467.507	421.906	449.932	461.062	454.408	442.168	0.0196229	0.835491	0.9853	-
ENSMUSG00000006784_Ttc25	69.3604	70.6315	90.1868	76.224	61.461	65.5064	-0.174726	0.405895	0.918958	-
ENSMUSG00000006800_Sulf2	1450.26	1820.41	1566.24	1688.08	1937.53	1845.44	0.177657	0.164109	0.911908	-
ENSMUSG00000006818_Sod2	2394.28	2151.91	2229.62	2314.61	2295.22	1945.74	-0.0475822	0.648219	0.965511	-
ENSMUSG00000006850_Tmco6	488.225	477.469	584.21	475.935	415.114	488.227	-0.167258	0.181138	0.911908	-
ENSMUSG00000006906_Stambp	23.4204	25.4274	36.0747	30.6755	25.1889	25.5884	-0.0545302	0.88708	0.989266	-
ENSMUSG00000006920_Ezh1	375.627	386.119	369.766	360.67	423.174	382.803	0.0432659	0.705507	0.970024	-
ENSMUSG00000006930_Hap1	943.121	1004.85	991.053	1016.01	1018.64	1008.18	0.0502716	0.589585	0.952587	-
ENSMUSG00000006931_Leprel4	211.684	191.176	228.473	240.756	195.466	207.778	0.0309045	0.830236	0.9853	-
ENSMUSG00000006932_Ctnnb1	34348.7	30207.7	32587.5	31671.1	28817.1	27958.9	-0.135296	0.173569	0.911908	-
ENSMUSG00000006941_Eif1b	408.055	382.352	407.845	376.472	358.69	336.744	-0.160226	0.246219	0.911908	-
ENSMUSG00000006958_Chrd	186.462	177.991	127.264	127.35	137.028	124.872	-0.339614	0.0659805	0.886313	-
ENSMUSG00000006998_Psmd2	14770.2	13028.2	13172.3	13750.1	12667	10772.7	-0.139661	0.229211	0.911908	-
ENSMUSG00000007021_Syngr3	63.0549	60.2722	55.1141	48.3372	50.3779	60.3887	-0.168477	0.505172	0.93752	-
ENSMUSG00000007029_Vars	3691.41	4442.25	3106.43	3957.14	4226.7	3582.38	0.065948	0.693651	0.969793	-
ENSMUSG00000007030_D17H6S56E-3	21.6188	3.76702	4.0083	7.43649	5.03779	15.3531	-0.0940559	0.895265	0.989609	-
ENSMUSG00000007033_Hspa1l	49.5431	37.6702	56.1162	40.9007	62.4685	59.3652	0.181616	0.541942	0.942137	-
ENSMUSG00000007034_Slc44a4	56.7494	66.8645	72.1494	80.8718	52.393	73.6947	0.0851356	0.701311	0.969793	-
ENSMUSG00000007035_Msh5	11.7102	19.7768	33.0685	12.0843	9.06801	26.612	-0.432583	0.379932	0.91642	-
ENSMUSG00000007036_Abhd16a	259.426	190.234	181.376	234.249	194.459	245.649	0.0943733	0.619051	0.959615	-
ENSMUSG00000007038_Neu1	242.311	266.516	274.569	215.658	219.647	216.99	-0.263241	0.0302625	0.766229	-
ENSMUSG00000007039_Ddah2	1323.25	1225.22	1616.35	1161.02	1137.53	1401.22	-0.170715	0.231446	0.911908	-
ENSMUSG00000007041_Clic1	1806.07	1742.24	2278.72	1600.7	1551.64	1868.98	-0.214594	0.172849	0.911908	-
ENSMUSG00000007050_Lsm2	525.157	735.51	555.15	617.229	709.32	592.628	0.0798211	0.600599	0.95544	-
ENSMUSG00000007080_Pole	2754.6	3343.23	2541.26	2911.39	3236.27	2989.75	0.0807318	0.440328	0.925726	-
ENSMUSG00000007097_Atp1a2	63.9557	42.3789	169.351	51.1259	36.2721	160.695	-0.152012	0.864448	0.986769	-
ENSMUSG00000007107_Atp1a4	77.4674	63.0975	62.1287	57.6328	57.4308	47.0827	-0.322681	0.129615	0.911908	-
ENSMUSG00000007122_Casq1	120.705	113.952	90.1868	117.125	92.6953	64.4829	-0.242066	0.280755	0.911908	-
ENSMUSG00000007207_Stx1a	151.332	151.622	156.324	118.054	141.058	143.295	-0.192092	0.278306	0.911908	-
ENSMUSG00000007216_Zfp775	99.987	62.1558	87.1806	97.6039	94.7104	80.8595	0.132021	0.546252	0.942317	-
ENSMUSG00000007338_Mrpl49	1950.2	1778.03	1821.77	1821.01	1747.1	1607.98	-0.100547	0.363359	0.91642	-
ENSMUSG00000007379_Dennd2c	1461.07	1421.11	1449	1398.99	1581.86	1707.26	0.113673	0.187296	0.911908	-
ENSMUSG00000007411_Mark3	2902.33	2724.49	2931.07	2629.73	2598.49	2682.69	-0.113384	0.0554213	0.852995	-
ENSMUSG00000007415_Gatad1	1765.54	1618.87	1732.59	1676	1624.18	1535.31	-0.0815091	0.436353	0.925726	-
ENSMUSG00000007440_Pcdha4	20.718	19.7768	24.0498	12.0843	24.1814	25.5884	-0.0657765	0.885165	0.989266	-
ENSMUSG00000007458_M6pr	7054.04	6023.46	7226.97	6604.53	6115.87	6380.73	-0.0880876	0.389815	0.91642	-
ENSMUSG00000007476_Lrrc8a	588.212	740.218	767.59	566.103	819.144	818.83	0.0723618	0.710346	0.97056	-
ENSMUSG00000007564_Ppp2r1a	4765.15	5203.19	4414.14	5156.28	5229.22	4400.19	0.0398949	0.741518	0.97364	-
ENSMUSG00000007570_Fance	521.554	523.615	532.102	514.047	507.809	528.145	-0.0251223	0.800835	0.983957	-
ENSMUSG00000007589_Tinf2	670.183	805.199	746.546	793.845	843.325	794.265	0.130316	0.170324	0.911908	-
ENSMUSG00000007594_Hapln4	13.5118	17.8933	18.0374	10.2252	19.1436	19.4472	-0.0214897	0.966009	0.998702	-
ENSMUSG00000007603_Dus3l	709.818	744.927	594.231	609.792	672.041	649.946	-0.0858961	0.480418	0.932684	-
ENSMUSG00000007610_Gtpbp3	998.969	843.811	1047.17	1016.01	809.068	1016.37	-0.0240603	0.849911	0.9853	-
ENSMUSG00000007613_Tgfbr1	1791.66	1714.93	1978.1	1587.69	1779.35	1708.28	-0.111889	0.186817	0.911908	-
ENSMUSG00000007617_Homer1	1345.77	1229.93	1495.1	1359.95	1340.05	1449.33	0.0278213	0.763208	0.979026	-
ENSMUSG00000007646_Rad51c	315.274	293.827	284.589	234.249	247.859	197.543	-0.394913	0.00764641	0.468532	-
ENSMUSG00000007656_Arpp19	3128.42	2807.37	2944.1	2967.16	2966.25	2338.78	-0.102189	0.435577	0.925726	-
ENSMUSG00000007659_Bcl2l1	2021.36	2500.36	2157.47	2058.05	2511.84	2429.88	0.0674924	0.59102	0.952587	-
ENSMUSG00000007670_Khsrp	2367.26	2811.14	2348.86	2964.37	2821.16	3230.28	0.260296	0.0953886	0.911908	-
ENSMUSG00000007721_Ccdc124	1023.29	1221.45	973.015	1099.67	1192.95	757.418	-0.0770977	0.676526	0.96667	-
ENSMUSG00000007739_Cct4	15080	13357.8	13797.6	14120	13042.8	11188.3	-0.139164	0.281979	0.911908	-
ENSMUSG00000007777_0610009B22Rik	484.622	471.819	488.011	455.485	406.046	375.638	-0.222864	0.16864	0.911908	-
ENSMUSG00000007783_Cpt1c	895.379	843.811	843.748	870.069	803.023	809.618	-0.0569737	0.57619	0.948526	-
ENSMUSG00000007812_Zfp655	2323.12	2175.45	2471.12	2032.95	2112.85	2472.87	-0.074659	0.508465	0.937592	-
ENSMUSG00000007815_Rhoa	5566.85	5486.66	5539.47	5363.57	5121.41	4507.66	-0.14622	0.138019	0.911908	-
ENSMUSG00000007817_Zmiz1	164.843	222.254	237.492	224.954	212.595	333.673	0.304417	0.314209	0.915935	-
ENSMUSG00000007827_Ankrd26	790.888	838.161	792.642	905.393	957.179	824.971	0.150453	0.0843668	0.911908	-
ENSMUSG00000007833_Aldh16a1	1198.04	1209.21	1079.24	1227.95	1236.27	1272.26	0.0993822	0.25328	0.911908	-
ENSMUSG00000007836_Hnrnpa0	5360.57	5567.65	4835.01	5362.64	5330.98	4492.31	-0.053818	0.643345	0.963872	-
ENSMUSG00000007837_Prrg2	41.4361	29.1944	34.0706	51.1259	50.3779	47.0827	0.503363	0.057879	0.86066	-
ENSMUSG00000007850_Hnrnph1	10338.3	10790.6	9615.92	9740.87	11143.6	9870.99	0.000433567	0.995983	0.999082	-
ENSMUSG00000007867_1700019E19Rik	164.843	174.224	216.448	167.321	166.247	170.931	-0.136225	0.320014	0.91642	-
ENSMUSG00000007872_Id3	511.645	420.964	274.569	574.469	441.31	329.579	0.156174	0.531278	0.941169	-
ENSMUSG00000007880_Arid1a	2240.25	3176.54	2875.96	3242.31	3526.45	5032.73	0.509039	0.0415752	0.823143	-
ENSMUSG00000007888_Crlf1	33.329	31.0779	37.0768	18.5912	16.1209	19.4472	-0.904292	0.00673143	0.453438	-
ENSMUSG00000007891_Ctsd	6995.49	6034.76	6476.41	6539.46	6062.47	5806.53	-0.0835709	0.435218	0.925726	-
ENSMUSG00000007892_Rplp1	39469.7	31977.3	37559.8	38343.5	32025.2	29861.7	-0.121084	0.375438	0.91642	-
ENSMUSG00000007908_Hmgcll1	72.9635	64.0393	81.1681	92.0266	70.529	71.6476	0.106077	0.639604	0.962323	-
ENSMUSG00000007946_Phox2a	27.9243	20.7186	14.0291	29.746	20.1511	30.7061	0.36053	0.548137	0.942317	-
ENSMUSG00000007950_Abhd8	227.898	255.215	169.351	260.277	238.791	180.143	0.0578941	0.769234	0.979591	-
ENSMUSG00000007987_Rabl5	132.415	133.729	129.268	117.125	137.028	88.0242	-0.207987	0.302812	0.91227	-
ENSMUSG00000007989_Fzd3	118.003	114.894	110.228	98.5335	132.998	93.1419	-0.0811591	0.667163	0.96667	-
ENSMUSG00000008028_1700008O03Rik	9.90862	7.53403	5.01038	21.3799	16.1209	12.2824	1.14491	0.0535756	0.850451	-
ENSMUSG00000008035_Mid1ip1	337.794	338.09	351.728	320.699	330.479	300.92	-0.109426	0.300407	0.91227	-
ENSMUSG00000008036_Ap2s1	1328.66	1264.78	1286.66	1319.05	1241.31	1050.15	-0.103595	0.402031	0.918958	-
ENSMUSG00000008090_Fgfrl1	63.9557	62.1558	54.1121	63.2102	45.3401	54.2475	-0.145739	0.551633	0.942536	-
ENSMUSG00000008129_4930432K21Rik	97.2847	52.7382	90.1868	88.3083	78.5895	76.7653	0.0212161	0.941417	0.99567	-
ENSMUSG00000008136_Fhl2	77.4674	84.7578	145.301	107.829	70.529	141.248	0.0573693	0.864871	0.986832	-
ENSMUSG00000008140_2310044H10Rik	369.321	452.984	392.814	426.669	416.121	442.168	0.0807441	0.507848	0.937592	-
ENSMUSG00000008153_Clstn3	262.128	242.031	191.396	245.404	251.889	214.943	0.0331852	0.856705	0.985753	-
ENSMUSG00000008167_Fbxw9	992.664	1061.36	905.876	1056.91	1079.09	1162.74	0.155912	0.169333	0.911908	-
ENSMUSG00000008193_Spib	22.5196	16.9516	17.0353	14.873	14.1058	10.2354	-0.526478	0.336128	0.91642	-
ENSMUSG00000008200_Fnbp4	2490.67	3014.55	2723.64	2545.14	3009.57	2781.97	0.0187299	0.878188	0.989216	-
ENSMUSG00000008206_Lass4	340.496	304.186	349.724	353.233	342.569	348.003	0.0704321	0.544872	0.942187	-
ENSMUSG00000008226_Scrn3	515.248	490.654	536.11	548.441	455.416	449.333	-0.0838039	0.415472	0.921883	-
ENSMUSG00000008301_Phax	1745.72	1347.65	1509.13	1496.59	1412.6	1279.42	-0.135923	0.324481	0.91642	-
ENSMUSG00000008305_Tle1	675.588	630.975	539.117	646.975	670.025	699.076	0.125679	0.191279	0.911908	-
ENSMUSG00000008318_Relt	94.5823	105.476	135.28	114.336	118.892	114.636	0.0559195	0.767453	0.979591	-
ENSMUSG00000008333_Snrpb2	2839.27	2745.21	2796.79	2646.46	2671.03	2216.98	-0.153559	0.196524	0.911908	-
ENSMUSG00000008348_Ubc	9013.24	11290.7	7924.41	10350.7	11161.7	11614.1	0.230808	0.167869	0.911908	-
ENSMUSG00000008373_Prpf31	3378.84	3023.97	2677.55	3286	3157.68	2390.98	-0.0395672	0.793685	0.982863	-
ENSMUSG00000008384_Sertad1	568.395	665.82	665.378	576.328	523.93	519.957	-0.228434	0.0528987	0.850451	-
ENSMUSG00000008393_Carhsp1	2732.98	2750.86	2792.78	2541.42	2564.23	2561.91	-0.110239	0.0935605	0.911908	-
ENSMUSG00000008398_Elk3	143.225	101.709	93.193	120.843	128.967	83.9301	-0.0200058	0.932251	0.995106	-
ENSMUSG00000008429_Herpud2	261.227	280.643	268.556	261.207	292.192	311.155	0.0924214	0.518964	0.939947	-
ENSMUSG00000008435_Rdh13	1493.5	1309.98	1468.04	1292.09	1219.14	1334.69	-0.151428	0.110754	0.911908	-
ENSMUSG00000008438_Adam21	4.50392	8.47578	12.0249	8.36605	9.06801	9.21184	0.102533	0.851786	0.9853	-
ENSMUSG00000008450_Nutf2	2762.7	2658.57	2315.8	2827.73	2708.31	2001.02	-0.0377433	0.813836	0.98426	-
ENSMUSG00000008475_Arpc5	2861.79	2921.32	2955.12	2876.99	2711.34	2560.89	-0.100313	0.143314	0.911908	-
ENSMUSG00000008489_Elavl2	258.525	297.594	282.585	306.755	332.494	427.839	0.346954	0.0681623	0.888972	-
ENSMUSG00000008540_Mgst1	217.089	26.3691	42.0872	27.8868	18.136	16.3766	-2.19341	0.000203153	0.0572207	-
ENSMUSG00000008575_Nfib	256.723	339.031	238.494	321.628	439.295	544.522	0.645202	0.0108194	0.54424	-
ENSMUSG00000008604_Ubqln4	3206.79	3767.02	3492.23	3743.34	3994.96	3535.3	0.107302	0.309677	0.913821	-
ENSMUSG00000008668_Rps18	33639.8	28782.8	33381.1	32306.9	29237.3	25897.5	-0.131745	0.315567	0.915935	-
ENSMUSG00000008682_Rpl10	19273.2	19785.3	17858	19626.8	19349.1	15263	-0.0695063	0.573361	0.948003	-
ENSMUSG00000008683_Rps15a	24267.1	19280.5	25086	22049.2	19386.4	18774.7	-0.188889	0.242389	0.911908	-
ENSMUSG00000008686_Zfp955a	466.606	424.731	534.106	523.343	459.446	546.569	0.102374	0.399598	0.918958	-
ENSMUSG00000008690_Ncaph2	5462.35	5318.08	5549.49	5441.65	5406.55	4953.92	-0.0472379	0.426627	0.924814	-
ENSMUSG00000008730_Hipk1	1674.56	2020.06	2073.29	2002.28	2093.7	2373.58	0.165707	0.162082	0.911908	-
ENSMUSG00000008734_Gprc5b	474.713	598.014	426.884	533.568	595.466	413.509	0.0406902	0.822708	0.9853	-
ENSMUSG00000008763_Man1a2	2360.95	2229.13	2472.12	2470.77	2520.91	2411.45	0.0682244	0.312033	0.914439	-
ENSMUSG00000008822_Acyp1	325.183	246.739	369.766	301.178	264.988	273.284	-0.165031	0.43605	0.925726	-
ENSMUSG00000008855_Hdac5	767.468	849.462	759.573	804.071	809.068	919.137	0.0911991	0.419912	0.923997	-
ENSMUSG00000008859_Rala	1021.49	959.647	866.795	993.701	968.262	665.299	-0.116165	0.475413	0.930641	-
ENSMUSG00000008892_Vdac3	4225.58	3421.39	4084.46	3805.62	3296.73	3049.12	-0.208584	0.140099	0.911908	-
ENSMUSG00000008958_Vps72	765.666	864.53	844.75	816.155	810.076	749.229	-0.0582119	0.469423	0.929792	-
ENSMUSG00000008976_Gabpa	5353.36	4869.81	5473.34	5370.08	5214.11	4819.84	-0.0270106	0.738849	0.973064	-
ENSMUSG00000008999_Bmp7	86.4753	128.079	202.419	85.5196	89.6726	177.072	-0.243022	0.536953	0.94119	-
ENSMUSG00000009013_Dynll1	5520.91	6215.58	5887.19	5634.07	5890.18	5110.52	-0.0832309	0.330334	0.91642	-
ENSMUSG00000009030_Pdcl	3787.8	3301.79	4340.99	3547.21	3005.54	3280.44	-0.217049	0.160374	0.911908	-
ENSMUSG00000009035_Tmem184b	371.123	582.004	542.123	513.118	580.353	642.781	0.215787	0.307147	0.91276	-
ENSMUSG00000009073_Nf2	2704.15	2716.02	2506.19	2857.47	2670.03	2233.36	-0.0302468	0.740558	0.973251	-
ENSMUSG00000009075_Cabp7	63.0549	55.5635	41.0851	52.0554	40.3023	48.1063	-0.187125	0.51136	0.937592	-
ENSMUSG00000009076_Zmat5	171.149	215.662	185.384	237.968	221.663	157.625	0.111001	0.564717	0.946514	-
ENSMUSG00000009079_Ewsr1	5045.29	5500.78	5421.23	5399.82	6147.11	5443.17	0.0895782	0.408282	0.918958	-
ENSMUSG00000009090_Ap1b1	1607.9	1722.47	1380.86	1588.62	1673.55	1443.19	-0.00193115	0.988822	0.999082	-
ENSMUSG00000009092_Derl3	39.6345	30.1361	42.0872	45.5485	33.2494	26.612	-0.0820182	0.839962	0.9853	-
ENSMUSG00000009108_Gnat2	113.499	123.37	92.1909	115.266	118.892	68.577	-0.119794	0.666101	0.96667	-
ENSMUSG00000009112_Bcl2l13	1234.07	1153.65	1170.42	1169.39	1158.69	1193.44	-0.0152015	0.847072	0.9853	-
ENSMUSG00000009145_Dqx1	16.2141	48.0294	31.0643	17.6617	40.3023	27.6355	-0.15644	0.718993	0.971295	-
ENSMUSG00000009207_Lnp	1017.89	1033.1	1203.49	988.124	998.489	1230.29	-0.0167415	0.916989	0.991782	-
ENSMUSG00000009246_Trpm5	52.2455	45.2042	59.1225	50.1963	40.3023	57.3181	-0.0816322	0.74592	0.974527	-
ENSMUSG00000009248_Ascl2	81.9713	81.9326	31.0643	86.4492	57.4308	22.5178	-0.227589	0.603298	0.956143	-
ENSMUSG00000009291_Pttg1ip	1205.25	1229.93	1294.68	1206.57	1182.87	1208.8	-0.0514635	0.507452	0.937592	-
ENSMUSG00000009292_Trpm2	13.5118	5.65052	17.0353	17.6617	9.06801	11.2589	0.0785842	0.888577	0.989266	-
ENSMUSG00000009293_Ube2g2	837.729	862.646	858.779	849.619	791.94	720.57	-0.114827	0.241528	0.911908	-
ENSMUSG00000009376_Met	155.836	154.448	129.268	154.307	150.126	115.66	-0.065206	0.783269	0.981434	-
ENSMUSG00000009406_Elk1	397.246	370.109	437.907	431.316	457.431	483.11	0.186884	0.1568	0.911908	-
ENSMUSG00000009418_Nav1	346.802	428.498	404.838	434.105	480.605	516.886	0.278654	0.168324	0.911908	-
ENSMUSG00000009470_Tnpo1	14426.1	13673.3	14869.8	13994.5	13500.3	12474.9	-0.104339	0.178302	0.911908	-
ENSMUSG00000009535_Rnmt	4688.58	4244.48	4526.37	4520.46	4287.16	4051.16	-0.0657837	0.44424	0.926853	-
ENSMUSG00000009549_Srp14	2607.77	2330.84	2580.34	2440.1	2319.4	2039.91	-0.14499	0.265048	0.911908	-
ENSMUSG00000009555_Cdk9	1235.88	1309.04	1218.52	1288.37	1278.59	1498.46	0.111002	0.253277	0.911908	-
ENSMUSG00000009563_Tor2a	755.758	725.15	691.432	733.424	767.759	734.9	0.0412004	0.676034	0.96667	-
ENSMUSG00000009566_Fpgs	936.815	1114.09	874.812	1079.22	1094.21	982.596	0.109226	0.338484	0.91642	-
ENSMUSG00000009569_Mkl2	378.329	427.556	431.895	475.935	448.363	526.098	0.229017	0.101378	0.911908	-
ENSMUSG00000009575_Cbx5	18614.7	18061.9	16330.8	18674	18843.3	14273.2	-0.0334997	0.784424	0.981449	-
ENSMUSG00000009585_Apobec3	1064.73	996.376	957.984	953.73	984.383	876.148	-0.101531	0.323648	0.91642	-
ENSMUSG00000009596_Taf7l	163.042	146.914	207.43	138.505	107.809	152.507	-0.374053	0.0712845	0.90244	-
ENSMUSG00000009621_Vav2	800.797	825.918	807.673	693.453	774.811	714.429	-0.157628	0.212976	0.911908	-
ENSMUSG00000009628_Tex15	660.275	586.713	747.548	722.269	678.086	790.171	0.135589	0.281214	0.911908	-
ENSMUSG00000009630_Ppp2cb	1689.87	1537.88	1742.61	1591.41	1459.95	1404.29	-0.15726	0.0858719	0.911908	-
ENSMUSG00000009633_G0s2	62.1541	18.8351	41.0851	31.6051	35.2645	29.6826	-0.340521	0.407882	0.918958	-
ENSMUSG00000009640_Dmap1	862.951	826.86	915.897	870.999	820.152	751.276	-0.0925956	0.3708	0.91642	-
ENSMUSG00000009647_Ccdc109a	326.985	335.264	370.768	371.825	333.501	350.05	0.0328966	0.751358	0.976263	-
ENSMUSG00000009670_Tex11	700.81	597.072	782.621	659.989	601.512	632.546	-0.134961	0.357606	0.91642	-
ENSMUSG00000009681_Bcr	632.35	896.55	637.32	678.58	800	678.605	-0.00618625	0.972513	0.999082	-
ENSMUSG00000009687_Fxyd5	13.5118	14.1263	29.0602	14.873	12.0907	24.5649	-0.134131	0.786107	0.981449	-
ENSMUSG00000009731_Kcnd1	36.9321	34.8449	21.0436	35.3233	40.3023	36.8473	0.271781	0.436925	0.925726	-
ENSMUSG00000009733_Tfcp2	154.034	167.632	134.278	179.405	174.307	160.695	0.173498	0.274375	0.911908	-
ENSMUSG00000009739_Pou6f1	40.5353	48.0294	39.0809	42.7598	37.2796	35.8238	-0.138317	0.629795	0.961458	-
ENSMUSG00000009741_Ubp1	2616.78	2727.32	2627.44	2516.32	2496.73	2731.82	-0.0417364	0.601068	0.95544	-
ENSMUSG00000009772_Nuak2	511.645	521.732	545.129	401.57	407.053	386.897	-0.40026	3.09405e-05	0.0141961	R
ENSMUSG00000009828_Ick	206.28	210.011	193.401	234.249	237.783	226.202	0.195035	0.0997418	0.911908	-
ENSMUSG00000009863_Sdhb	1942.09	1712.11	1922.98	1854.47	1775.32	1493.34	-0.122325	0.372502	0.91642	-
ENSMUSG00000009876_Cox4i2	35.1306	22.6021	41.0851	32.5346	43.325	38.8944	0.215901	0.495726	0.936174	-
ENSMUSG00000009894_Snap47	1529.53	1287.38	1242.57	1524.48	1297.73	1102.35	-0.0486165	0.723713	0.972048	-
ENSMUSG00000009900_Wnt3a	15.3133	16.0098	15.0311	5.57737	2.01511	8.1883	-1.55617	0.00238368	0.286032	-
ENSMUSG00000009905_Kdsr	2001.54	1762.96	2018.18	1867.49	1784.38	1908.9	-0.0564011	0.54736	0.942317	-
ENSMUSG00000009907_Vps4b	5202.93	5009.19	5161.69	4940.62	4933	4572.14	-0.0897592	0.217858	0.911908	-
ENSMUSG00000009927_Rps25	16284.4	14892	15280.6	16351	15033.8	12414.5	-0.0849678	0.536004	0.941169	-
ENSMUSG00000009941_Nxf2	36.0314	21.6603	30.0623	8.36605	9.06801	20.4707	-1.22088	0.00536131	0.420599	-
ENSMUSG00000009995_Taz	385.536	332.439	401.832	342.079	312.343	515.863	0.0631736	0.765052	0.979127	-
ENSMUSG00000010021_Kif19a	41.4361	57.447	94.1951	56.7032	39.2947	51.1769	-0.386337	0.253679	0.911908	-
ENSMUSG00000010025_Aldh3a2	550.379	475.586	465.965	415.514	431.234	412.486	-0.245667	0.0230838	0.701831	-
ENSMUSG00000010045_Tmem115	720.627	756.228	756.567	675.791	695.214	737.97	-0.0828915	0.368933	0.91642	-
ENSMUSG00000010047_Hyal2	627.846	749.636	602.247	649.763	646.852	563.969	-0.0894582	0.571499	0.948003	-
ENSMUSG00000010048_Ifrd2	835.928	889.016	800.658	831.028	843.325	773.794	-0.0449647	0.643033	0.963802	-
ENSMUSG00000010051_Hyal1	208.982	201.535	175.363	161.744	215.617	271.237	0.143713	0.44101	0.926033	-
ENSMUSG00000010054_Tusc2	705.314	561.285	669.386	630.243	604.534	508.698	-0.150611	0.24064	0.911908	-
ENSMUSG00000010057_Nprl2	359.413	303.245	323.67	300.248	279.093	317.297	-0.138299	0.256629	0.911908	-
ENSMUSG00000010064_Slc38a3	32.4282	13.1846	8.0166	5.57737	10.0756	12.2824	-0.959474	0.0696533	0.896021	-
ENSMUSG00000010066_Cacna2d2	63.9557	74.3985	84.1743	68.7875	57.4308	97.2361	0.00634438	0.981892	0.999082	-
ENSMUSG00000010067_Rassf1	982.755	922.919	896.858	819.873	682.116	766.63	-0.304764	0.012258	0.578187	-
ENSMUSG00000010086_Rnf112	60.3525	45.2042	28.0581	49.2667	38.2872	32.7532	-0.153162	0.660349	0.966165	-
ENSMUSG00000010095_Slc3a2	1944.79	2235.72	2101.35	2082.22	2270.03	2288.63	0.0801304	0.454975	0.926853	-
ENSMUSG00000010097_Nxf1	1959.21	2121.77	1886.91	1958.59	2137.03	1882.29	0.00229649	0.979531	0.999082	-
ENSMUSG00000010110_Stx5a	1223.26	1147.06	1271.63	1131.28	1174.81	1400.2	0.0249269	0.802101	0.98406	-
ENSMUSG00000010122_Slc47a1	182.859	149.739	100.208	169.18	164.232	82.9065	-0.0562713	0.857006	0.985863	-
ENSMUSG00000010142_Tnfrsf13b	20.718	17.8933	23.0477	27.8868	21.1587	14.3295	0.0471472	0.90486	0.990707	-
ENSMUSG00000010154_Spire2	285.549	272.167	231.479	306.755	303.275	270.214	0.156821	0.297626	0.911908	-
ENSMUSG00000010175_Prox1	15.3133	21.6603	15.0311	10.2252	17.1285	13.306	-0.357665	0.569165	0.948003	-
ENSMUSG00000010205_Raver1	807.102	1174.37	950.97	1133.14	1322.92	1360.28	0.380055	0.0561583	0.855295	-
ENSMUSG00000010277_2610507B11Rik	7963.83	8544.53	7676.9	8362.33	8835.27	8931.39	0.111442	0.142558	0.911908	-
ENSMUSG00000010290_AI597479	1303.43	1196.03	1196.48	1346	1144.58	1111.56	-0.0367782	0.737427	0.973064	-
ENSMUSG00000010342_Tex14	518.852	611.198	520.077	603.285	582.368	490.274	0.0230173	0.843929	0.9853	-
ENSMUSG00000010358_Ifi35	43.2376	39.5537	37.0768	41.8303	36.2721	54.2475	0.140566	0.663712	0.966602	-
ENSMUSG00000010362_Rdm1	1254.79	1293.97	1178.44	1358.09	1245.34	1015.35	-0.0421662	0.695702	0.969793	-
ENSMUSG00000010376_Nedd8	1411.53	1233.7	1303.7	1318.12	1235.27	931.419	-0.180153	0.265617	0.911908	-
ENSMUSG00000010392_Gosr1	780.98	840.986	1003.08	795.704	869.522	906.854	-0.0288754	0.76727	0.979582	-
ENSMUSG00000010406_Mrpl52	340.496	377.643	380.789	378.331	368.766	371.544	0.0264698	0.825505	0.9853	-
ENSMUSG00000010453_4632411B12Rik	2222.23	2300.7	2392.96	2150.08	2228.72	2540.42	0.000606225	0.995301	0.999082	-
ENSMUSG00000010492_Gm16119	79.269	82.8743	80.166	105.04	73.5517	135.107	0.372167	0.157194	0.911908	-
ENSMUSG00000010517_Faf1	3735.55	3381.84	3603.46	3686.64	3393.45	3189.34	-0.0619425	0.522408	0.939947	-
ENSMUSG00000010538_1700021C14Rik	41.4361	36.7284	34.0706	25.0982	43.325	26.612	-0.242329	0.586169	0.950744	-
ENSMUSG00000010554_Mettl16	3845.45	3605.98	3434.11	3775.88	3761.21	3252.8	-0.0127383	0.876218	0.988645	-
ENSMUSG00000010592_Dazl	804.4	738.335	1233.55	715.762	596.474	1031.73	-0.244086	0.352411	0.91642	-
ENSMUSG00000010607_Pigyl	210.783	180.817	215.446	211.94	168.262	161.719	-0.161629	0.349523	0.91642	-
ENSMUSG00000010608_Rbm25	3530.17	3718.04	3923.13	3536.98	4056.43	3547.58	-0.00386565	0.963272	0.998473	-
ENSMUSG00000010609_Psen2	115.3	130.904	139.288	156.166	129.975	149.436	0.178632	0.305775	0.91276	-
ENSMUSG00000010651_Acaa1b	113.499	76.2821	91.1889	78.0831	66.4988	68.577	-0.398514	0.110228	0.911908	-
ENSMUSG00000010660_Plcd1	998.969	991.667	1282.66	762.24	780.857	928.348	-0.405269	0.00429663	0.387616	-
ENSMUSG00000010663_Fads1	926.907	1079.25	1064.2	919.336	1013.6	1061.41	-0.0362349	0.716149	0.971295	-
ENSMUSG00000010721_Lmbr1	160.34	123.37	183.38	147.8	151.134	162.742	-0.0163199	0.939763	0.995612	-
ENSMUSG00000010751_Tnfrsf22	84.6737	80.9908	72.1494	76.224	97.733	77.7888	0.0796319	0.712816	0.97092	-
ENSMUSG00000010755_Cars	3693.21	3596.56	3419.08	3879.99	3533.5	3245.64	-0.00661677	0.943979	0.995993	-
ENSMUSG00000010760_Phlda2	302.663	352.216	237.492	266.784	289.169	159.672	-0.318263	0.203607	0.911908	-
ENSMUSG00000010796_Asz1	285.549	166.69	195.405	205.433	127.96	126.919	-0.491924	0.117973	0.911908	-
ENSMUSG00000010830_Kdelr3	784.583	749.636	897.86	739.931	599.496	751.276	-0.21765	0.104048	0.911908	-
ENSMUSG00000010911_Apip	435.979	422.847	411.853	408.077	451.386	373.591	-0.0434944	0.778601	0.981434	-
ENSMUSG00000010914_Pdhx	1953.8	1817.58	1951.04	1809.86	1679.6	1609	-0.16627	0.0668203	0.886313	-
ENSMUSG00000010936_Vac14	944.022	1020.86	873.81	991.842	1020.66	1061.41	0.114537	0.375717	0.91642	-
ENSMUSG00000011034_Slc5a1	75.6659	60.2722	59.1225	98.5335	68.5139	34.8003	0.0509684	0.907238	0.990965	-
ENSMUSG00000011096_Akt1s1	761.163	949.288	730.513	884.013	954.157	804.5	0.114462	0.40644	0.918958	-
ENSMUSG00000011114_Tbrg1	3857.16	3605.98	4074.44	3700.58	3414.61	3613.09	-0.104709	0.142669	0.911908	-
ENSMUSG00000011148_Adssl1	37.8329	34.8449	37.0768	55.7737	36.2721	53.2239	0.406155	0.156166	0.911908	-
ENSMUSG00000011158_Brf1	426.071	511.372	501.038	425.739	435.265	505.627	-0.0739123	0.611783	0.958084	-
ENSMUSG00000011179_Odc1	18620.1	16300.8	16506.2	16828.8	15443.8	13853.6	-0.156932	0.198554	0.911908	-
ENSMUSG00000011254_Thg1l	930.51	848.52	891.847	901.674	796.978	842.371	-0.071668	0.503113	0.93752	-
ENSMUSG00000011256_Adam19	271.136	276.876	264.548	254.7	323.426	353.12	0.19561	0.301699	0.91227	-
ENSMUSG00000011257_Pabpc4	4836.31	5956.59	5165.7	5217.63	5755.17	6076.74	0.0953402	0.360684	0.91642	-
ENSMUSG00000011267_Zfp296	346.802	632.859	326.677	615.37	841.31	533.263	0.60711	0.10647	0.911908	-
ENSMUSG00000011305_Plin5	33.329	20.7186	23.0477	17.6617	21.1587	14.3295	-0.539839	0.140713	0.911908	-
ENSMUSG00000011306_Sugp1	1068.33	967.181	952.974	979.758	1059.95	941.654	-0.00397125	0.963325	0.998473	-
ENSMUSG00000011382_Dhdh	170.248	186.467	146.303	197.997	144.081	143.295	-0.0501393	0.783912	0.981434	-
ENSMUSG00000011427_Zfp790	447.69	468.052	479.994	465.71	405.038	453.427	-0.0749103	0.467675	0.928715	-
ENSMUSG00000011589_Fsd1	373.825	332.439	308.639	364.388	340.554	333.673	0.0327831	0.809269	0.98406	-
ENSMUSG00000011658_Fuz	297.259	251.448	306.635	287.234	319.396	375.638	0.19899	0.242838	0.911908	-
ENSMUSG00000011751_Spnb4	523.356	553.751	450.934	547.512	565.24	570.11	0.138707	0.377804	0.91642	-
ENSMUSG00000011752_Pgam1	21420.6	20263.7	19100.6	20226.3	19226.2	16355.1	-0.123242	0.303878	0.91227	-
ENSMUSG00000011831_Evi5	2109.64	2266.8	2469.11	2139.85	2045.34	2185.25	-0.103391	0.192832	0.911908	-
ENSMUSG00000011832_Evi5l	166.645	177.991	207.43	153.378	144.081	165.813	-0.252013	0.188455	0.911908	-
ENSMUSG00000011837_Snapc2	327.885	321.138	350.726	366.247	434.257	288.638	0.124133	0.437862	0.925726	-
ENSMUSG00000011877_Git1	981.855	1325.99	1256.6	1132.21	1277.58	1580.34	0.162723	0.417214	0.923499	-
ENSMUSG00000011884_Gltp	197.272	236.38	235.488	242.615	233.753	211.872	0.0425109	0.772094	0.980248	-
ENSMUSG00000011958_Bnip2	1968.21	1574.61	1816.76	1607.21	1696.73	1518.93	-0.152328	0.101013	0.911908	-
ENSMUSG00000011960_Ccnt1	3425.68	3536.29	3481.21	3326.9	3698.74	3570.1	0.020759	0.760444	0.978037	-
ENSMUSG00000012017_Scarf2	12.611	12.2428	17.0353	16.7321	10.0756	10.2354	-0.168715	0.751153	0.976263	-
ENSMUSG00000012076_Brms1l	520.653	503.838	497.029	439.682	504.786	474.921	-0.101078	0.376065	0.91642	-
ENSMUSG00000012114_Med15	261.227	379.527	300.623	367.177	366.751	402.25	0.271467	0.0969231	0.911908	-
ENSMUSG00000012117_Dhdds	410.758	412.488	457.948	366.247	364.736	533.263	-0.0196366	0.912612	0.99135	-
ENSMUSG00000012123_Aim1l	349.504	318.313	538.115	279.798	258.942	511.769	-0.199065	0.624325	0.960528	-
ENSMUSG00000012126_Ubxn11	155.836	163.865	176.365	176.617	124.937	195.496	0.00355805	0.987319	0.999082	-
ENSMUSG00000012282_Wnt8a	17.1149	11.301	11.0228	14.873	16.1209	14.3295	0.194869	0.657453	0.9658	-
ENSMUSG00000012296_Tjap1	420.666	528.324	478.992	439.682	479.597	548.616	0.0395847	0.827926	0.9853	-
ENSMUSG00000012396_Nanog	7635.95	7401.24	7240	8708.13	8561.21	7674.48	0.163145	0.0264931	0.734675	-
ENSMUSG00000012405_Rpl15	16921.2	16632.3	16638.5	17240.6	16685.1	13880.2	-0.0702393	0.503968	0.93752	-
ENSMUSG00000012422_Tmem167	2681.63	2454.21	2836.88	2616.72	2547.1	2741.03	-0.0122571	0.892563	0.989538	-
ENSMUSG00000012428_Steap4	20.718	21.6603	10.0208	32.5346	20.1511	12.2824	0.310756	0.604576	0.956348	-
ENSMUSG00000012429_2810021B07Rik	351.306	355.983	323.67	356.022	413.098	333.673	0.0965073	0.438085	0.925726	-
ENSMUSG00000012443_Kif11	5398.4	5527.15	4592.51	5519.73	5551.64	4104.38	-0.0321664	0.807535	0.98406	-
ENSMUSG00000012483_Rpa3	1091.75	979.424	1112.3	1001.14	983.376	950.866	-0.116912	0.38443	0.91642	-
ENSMUSG00000012519_Mlkl	46.8408	41.4372	54.1121	29.746	35.2645	39.918	-0.441589	0.176523	0.911908	-
ENSMUSG00000012535_Tnpo3	6561.31	6534.83	6096.63	6677.04	6495.72	5820.86	-0.0150247	0.863782	0.986769	-
ENSMUSG00000012609_Ttll5	454.896	510.431	577.195	588.412	615.617	707.264	0.309523	0.0651618	0.884404	-
ENSMUSG00000012640_Zfp715	860.249	767.529	1039.15	863.562	837.28	1002.04	0.019583	0.886063	0.989266	-
ENSMUSG00000012777_Acpt	6.30549	10.3593	9.01868	9.29561	8.06046	13.306	0.256606	0.623336	0.960183	-
ENSMUSG00000012819_Cdh23	38.7337	47.0877	63.1308	56.7032	56.4232	70.6241	0.304721	0.405724	0.918958	-
ENSMUSG00000012848_Rps5	25739.9	22106.7	24480.7	24252.3	21330	19315.2	-0.156362	0.223845	0.911908	-
ENSMUSG00000012889_Podnl1	27.9243	8.47578	16.0332	20.4503	19.1436	20.4707	0.191022	0.679501	0.967818	-
ENSMUSG00000013033_Lphn1	1794.36	2257.38	1533.18	2108.25	2289.17	2300.91	0.262099	0.121558	0.911908	-
ENSMUSG00000013076_Amotl1	544.074	609.315	578.198	541.005	595.466	538.381	-0.0480224	0.715189	0.971181	-
ENSMUSG00000013089_Etv5	11209.4	11417.8	10589.9	11595.3	11675.6	10467.7	0.0224806	0.710034	0.97056	-
ENSMUSG00000013150_Gfod2	405.353	387.061	390.809	373.684	358.69	322.414	-0.164893	0.0959364	0.911908	-
ENSMUSG00000013155_E130303B06Rik	167.546	165.749	168.349	154.307	180.353	205.731	0.105157	0.483958	0.934815	-
ENSMUSG00000013160_Atp6v0d1	1252.09	1288.32	1051.18	1195.42	1183.88	955.984	-0.106825	0.507479	0.937592	-
ENSMUSG00000013236_Ptprs	1469.18	1778.97	1680.48	1679.72	1819.65	2117.7	0.188564	0.182112	0.911908	-
ENSMUSG00000013275_Slc41a1	1979.92	2405.24	2481.14	1840.53	2161.21	2500.5	-0.0786397	0.644201	0.964282	-
ENSMUSG00000013415_Igf2bp1	20721.6	23827.3	19982.4	21148.4	22600.5	19440	-0.030329	0.790106	0.982106	-
ENSMUSG00000013418_B4galnt2	19.8172	29.1944	45.0934	23.239	26.1965	67.5535	0.314418	0.577603	0.948526	-
ENSMUSG00000013419_Zfp651	96.3839	92.2919	66.137	79.9423	97.733	95.189	0.0926839	0.628101	0.9614	-
ENSMUSG00000013465_Cobra1	2386.18	2260.21	2178.51	2211.43	2220.66	2067.55	-0.0705304	0.423182	0.924187	-
ENSMUSG00000013495_Tmem175	84.6737	68.748	87.1806	80.8718	88.665	92.1184	0.120391	0.568449	0.948003	-
ENSMUSG00000013523_Bcas1	15.3133	16.9516	21.0436	23.239	16.1209	15.3531	0.0421094	0.941418	0.99567	-
ENSMUSG00000013539_D16H22S680E	161.24	161.04	129.268	216.588	151.134	186.284	0.29502	0.119706	0.911908	-
ENSMUSG00000013584_Aldh1a2	12.611	25.4274	16.0332	14.873	17.1285	8.1883	-0.425684	0.499005	0.93705	-
ENSMUSG00000013593_Ndufs2	5017.37	4508.18	4706.75	4875.55	4387.91	4164.77	-0.0838148	0.392797	0.916777	-
ENSMUSG00000013622_0610007C21Rik	357.611	353.158	359.745	368.106	423.174	378.709	0.127903	0.376663	0.91642	-
ENSMUSG00000013629_Cad	5803.75	7065.04	5317.01	6884.33	7017.64	7531.19	0.236983	0.0929791	0.911908	-
ENSMUSG00000013646_Sh3bp5l	1413.33	1369.31	1441.99	1337.64	1313.85	1379.73	-0.0675407	0.252361	0.911908	-
ENSMUSG00000013662_Atad1	2362.76	2038.9	2716.63	2245.82	2088.67	2305.01	-0.100318	0.469665	0.929908	-
ENSMUSG00000013663_Pten	5124.56	5034.62	5103.57	5290.13	5480.1	5467.74	0.0892509	0.0677775	0.888921	-
ENSMUSG00000013698_Pea15a	1148.5	1244.06	1270.63	1133.14	1133.5	1111.56	-0.116509	0.225008	0.911908	-
ENSMUSG00000013701_Timm23	6628.87	6083.73	6433.32	6301.5	5797.48	5334.68	-0.135092	0.204587	0.911908	-
ENSMUSG00000013707_Tnfaip8l2	6.30549	6.59228	9.01868	18.5912	8.06046	9.21184	0.72703	0.167678	0.911908	-
ENSMUSG00000013736_Trnt1	3123.92	2699.07	2955.12	2807.28	2693.2	2525.07	-0.129253	0.234787	0.911908	-
ENSMUSG00000013766_Ly6g6e	110.796	118.661	128.266	128.279	193.451	202.66	0.550745	0.0132086	0.595214	-
ENSMUSG00000013787_Ehmt2	3367.13	3429.87	2694.58	3153.07	3126.45	2450.35	-0.120703	0.433018	0.925726	-
ENSMUSG00000013822_Elof1	878.264	759.054	761.577	849.619	793.955	616.17	-0.0859185	0.534077	0.941169	-
ENSMUSG00000013833_Med16	483.721	583.887	481.998	501.963	559.194	543.498	0.0497944	0.677146	0.966842	-
ENSMUSG00000013858_ORF61	1094.45	1077.37	1130.34	1023.45	1092.19	1239.5	0.0227919	0.878972	0.989266	-
ENSMUSG00000013878_Rnf170	238.708	231.671	267.554	268.643	257.935	312.179	0.184993	0.231799	0.911908	-
ENSMUSG00000013921_Clip3	24.3212	33.9031	32.0664	39.0416	37.2796	47.0827	0.452391	0.121751	0.911908	-
ENSMUSG00000013973_Dedd	604.426	662.995	564.168	644.186	683.124	645.852	0.107089	0.425889	0.924814	-
ENSMUSG00000013989_D430018E03Rik	51.3447	58.3887	46.0955	57.6328	37.2796	76.7653	0.138566	0.684275	0.968738	-
ENSMUSG00000013997_Nit1	1085.44	957.764	1004.08	995.56	1013.6	930.396	-0.0520259	0.591088	0.952587	-
ENSMUSG00000014039_Prdm15	449.491	522.673	352.731	521.484	603.527	462.639	0.260217	0.0839429	0.911908	-
ENSMUSG00000014074_Rnf168	1761.03	1766.73	1661.44	1636.03	1648.36	1423.74	-0.140244	0.0961711	0.911908	-
ENSMUSG00000014075_Tctex1d2	174.752	153.506	189.392	148.73	151.134	192.425	-0.0731607	0.667392	0.96667	-
ENSMUSG00000014077_1500003O03Rik	1318.75	1312.8	1548.21	1375.75	1372.29	1249.74	-0.0634923	0.48557	0.934815	-
ENSMUSG00000014158_Trpv4	23.4204	31.0779	23.0477	32.5346	26.1965	33.7767	0.254534	0.473289	0.930641	-
ENSMUSG00000014164_Klhl3	45.0392	38.6119	42.0872	47.4076	41.3098	26.612	-0.122054	0.738756	0.973064	-
ENSMUSG00000014177_Fam18b	1154.81	879.598	1201.49	1217.73	921.915	904.807	-0.0873791	0.563607	0.946403	-
ENSMUSG00000014195_Dnajc7	4040.02	4397.99	3718.7	4057.54	4094.71	3274.3	-0.0893286	0.44925	0.926853	-
ENSMUSG00000014198_Zfp385c	29.7259	35.7866	45.0934	28.8164	26.1965	67.5535	0.147213	0.729269	0.97221	-
ENSMUSG00000014226_Cacybp	7486.42	6587.57	6462.38	7573.14	6868.52	5005.1	-0.0786218	0.670614	0.96667	-
ENSMUSG00000014232_Cluap1	530.562	488.77	531.1	498.245	475.567	439.098	-0.133249	0.21134	0.911908	-
ENSMUSG00000014243_Zswim7	431.476	380.469	389.807	424.81	384.887	314.226	-0.0960923	0.578267	0.948526	-
ENSMUSG00000014245_Pigl	363.016	354.099	290.602	375.543	416.121	331.626	0.156065	0.389724	0.91642	-
ENSMUSG00000014294_Ndufa2	1702.48	1413.57	1766.66	1586.76	1374.31	1295.8	-0.197554	0.149012	0.911908	-
ENSMUSG00000014301_Pam16	295.457	337.148	363.753	340.219	346.6	301.944	-0.00887556	0.938392	0.995612	-
ENSMUSG00000014303_Glis2	1626.82	2006.88	1874.88	1095.95	1323.93	1603.88	-0.453324	0.0137051	0.610532	-
ENSMUSG00000014313_Cox6c	4488.61	3727.46	4367.04	4292.71	3843.83	3437.04	-0.120567	0.398432	0.918944	-
ENSMUSG00000014329_Bicc1	52.2455	80.9908	56.1162	58.5624	53.4005	66.5299	-0.085708	0.711723	0.97056	-
ENSMUSG00000014349_Ube2z	4887.65	4794.47	4895.14	4873.69	4482.62	4751.26	-0.0471133	0.388423	0.91642	-
ENSMUSG00000014353_Tmem87b	798.095	944.579	1021.11	812.437	872.544	1068.57	-0.00533474	0.967655	0.998702	-
ENSMUSG00000014355_Anapc1	5974	6737.31	5721.85	6367.49	7056.93	5757.4	0.0574199	0.592798	0.953034	-
ENSMUSG00000014361_Mertk	64.8565	67.8063	61.1266	70.6467	61.461	65.5064	0.0285662	0.910412	0.99097	-
ENSMUSG00000014402_Tsg101	778.277	838.161	873.81	795.704	828.212	740.018	-0.0745444	0.476948	0.932164	-
ENSMUSG00000014418_Hps5	466.606	453.925	377.782	403.43	486.65	433.98	0.0261225	0.811645	0.98426	-
ENSMUSG00000014426_Map3k4	1694.37	1624.53	1367.83	1728.98	1554.66	1430.91	0.00848828	0.945501	0.995993	-
ENSMUSG00000014444_Fam38a	2197.01	2787.59	2376.92	2486.58	2745.59	3741.03	0.285549	0.184694	0.911908	-
ENSMUSG00000014470_Rnf166	130.614	137.496	107.222	133.857	143.073	123.848	0.0928985	0.576439	0.948526	-
ENSMUSG00000014496_Ankrd28	2143.87	2393	2507.19	2527.48	2547.1	2641.75	0.131793	0.0887215	0.911908	-
ENSMUSG00000014498_Ankrd52	356.71	393.653	350.726	376.472	466.499	609.005	0.398579	0.115681	0.911908	-
ENSMUSG00000014503_Pkd2l2	2.70235	7.53403	5.01038	14.873	7.0529	22.5178	1.54808	0.00749629	0.464707	-
ENSMUSG00000014504_Srp19	1091.75	1027.45	970.009	970.462	938.036	813.712	-0.182379	0.145245	0.911908	-
ENSMUSG00000014547_Wdfy2	91.88	127.137	111.23	135.716	122.922	124.872	0.21838	0.186537	0.911908	-
ENSMUSG00000014550_Zfyve20	1425.94	1309.04	1434.97	1472.43	1328.97	1211.87	-0.0547113	0.571234	0.948003	-
ENSMUSG00000014551_Mrps25	1875.43	1562.37	1869.87	1720.62	1693.7	1493.34	-0.112825	0.298319	0.91193	-
ENSMUSG00000014554_Dguok	250.418	247.681	211.438	241.686	239.799	165.813	-0.131898	0.420958	0.923997	-
ENSMUSG00000014592_Camta1	364.818	322.08	355.737	334.642	347.607	477.992	0.153252	0.357016	0.91642	-
ENSMUSG00000014599_Csf1	22.5196	21.6603	14.0291	9.29561	6.04534	12.2824	-1.07903	0.0583042	0.86066	-
ENSMUSG00000014601_Fam40a	1075.54	1092.43	924.916	1115.47	1043.83	989.761	0.0258175	0.792301	0.982796	-
ENSMUSG00000014602_Kif1a	69.3604	87.5831	75.1557	59.4919	85.6424	96.2125	0.053961	0.840851	0.9853	-
ENSMUSG00000014606_Slc25a11	1324.15	1212.04	1084.25	1277.22	1232.24	966.219	-0.058842	0.675284	0.96667	-
ENSMUSG00000014633_2310061C15Rik	237.807	203.419	212.44	256.559	222.67	151.484	-0.050282	0.802654	0.98406	-
ENSMUSG00000014668_Chfr	1731.31	1587.8	1566.24	1713.18	1533.5	1442.16	-0.0590112	0.506056	0.93752	-
ENSMUSG00000014747_Ankrd53	13.5118	3.76702	12.0249	5.57737	9.06801	13.306	-0.0765888	0.895995	0.989609	-
ENSMUSG00000014748_Tex261	685.497	621.558	634.314	680.439	709.32	721.594	0.120077	0.136398	0.911908	-
ENSMUSG00000014763_Fam120b	288.251	318.313	245.508	298.389	320.403	240.531	0.0119544	0.940829	0.995612	-
ENSMUSG00000014767_Tbp	1374.6	1496.45	1607.33	1430.59	1494.21	1534.28	-0.00596512	0.945349	0.995993	-
ENSMUSG00000014769_Psmb1	5132.67	4144.66	4974.3	4700.79	4159.2	3641.75	-0.188924	0.231995	0.911908	-
ENSMUSG00000014771_Pdcd2	1182.73	1063.24	1144.37	1102.46	1058.94	1002.04	-0.0996968	0.283398	0.911908	-
ENSMUSG00000014773_Dll1	67.5588	121.486	48.0996	100.393	117.884	32.7532	0.0823243	0.86443	0.986769	-
ENSMUSG00000014776_Nol3	39.6345	32.0196	40.083	30.6755	27.204	27.6355	-0.384289	0.25527	0.911908	-
ENSMUSG00000014778_Fhod1	172.05	190.234	159.33	198.926	148.111	225.178	0.133176	0.500449	0.93752	-
ENSMUSG00000014782_Plekhg4	37.8329	41.4372	32.0664	23.239	53.4005	33.7767	-0.0170584	0.962307	0.998033	-
ENSMUSG00000014786_Slc9a5	92.7808	76.2821	69.1432	84.5901	71.5366	94.1654	0.0697726	0.805368	0.98406	-
ENSMUSG00000014791_Elmo3	45.94	40.4954	69.1432	60.4215	32.2418	76.7653	0.124886	0.761867	0.978314	-
ENSMUSG00000014837_4931428F04Rik	61.2533	58.3887	67.1391	59.4919	60.4534	87.0007	0.146828	0.609515	0.957261	-
ENSMUSG00000014846_Tppp3	498.134	442.624	543.125	402.5	333.501	363.356	-0.431872	0.00703822	0.453438	-
ENSMUSG00000014850_Msh3	1333.16	1322.22	1368.84	1395.27	1444.84	1399.18	0.0751899	0.253918	0.911908	-
ENSMUSG00000014856_Tmem208	575.601	491.595	533.104	570.751	544.081	546.569	0.0539739	0.622579	0.95992	-
ENSMUSG00000014859_E2f4	1084.54	1425.82	1276.64	1248.4	1415.62	1257.93	0.0506071	0.723988	0.972048	-
ENSMUSG00000014867_Surf4	2715.86	2894.95	3023.26	2869.56	2873.55	2795.28	-0.015705	0.80192	0.98406	-
ENSMUSG00000014873_Surf2	620.64	735.51	690.43	651.622	740.554	765.606	0.0761056	0.534874	0.941169	-
ENSMUSG00000014905_Dnajb9	576.502	532.091	626.297	572.61	506.801	639.711	-0.0130383	0.937469	0.995612	-
ENSMUSG00000014907_Naf1	578.303	698.781	691.432	723.199	691.184	765.606	0.147627	0.259192	0.911908	-
ENSMUSG00000014932_Yes1	1372.79	1165.89	1311.72	1392.48	1272.54	1285.56	0.037284	0.664195	0.966626	-
ENSMUSG00000014956_Ppp1cb	8246.68	7441.74	8729.08	7964.48	7320.91	6355.14	-0.174096	0.155673	0.911908	-
ENSMUSG00000014959_Gorasp2	1636.72	1905.17	1785.7	1625.8	1823.68	1517.91	-0.10087	0.320743	0.91642	-
ENSMUSG00000014980_Tsen15	790.888	656.402	658.364	726.917	669.018	533.263	-0.126098	0.45324	0.926853	-
ENSMUSG00000015002_Efr3a	2417.7	2232.9	2415	2419.65	2292.19	1962.12	-0.0820995	0.51769	0.939619	-
ENSMUSG00000015013_Trappc2l	286.449	268.4	296.614	250.052	262.972	211.872	-0.231559	0.180715	0.911908	-
ENSMUSG00000015016_Acsf3	198.172	226.021	161.334	198.926	239.799	161.719	0.0352294	0.8313	0.9853	-
ENSMUSG00000015023_Ddx19a	1316.05	1389.09	1235.56	1491.02	1423.68	1220.06	0.0696303	0.426951	0.924814	-
ENSMUSG00000015027_Galns	102.689	105.476	85.1764	108.759	77.5819	83.9301	-0.116462	0.525716	0.941169	-
ENSMUSG00000015053_Gata2	64.8565	126.195	66.137	28.8164	31.2343	14.3295	-1.78645	3.29511e-07	0.000277174	R
ENSMUSG00000015087_B230208H17Rik	1237.68	1456.89	1317.73	1309.75	1437.78	1592.62	0.11302	0.26509	0.911908	-
ENSMUSG00000015092_Edf1	1438.55	1465.37	1274.64	1490.09	1516.37	1134.08	-0.0131212	0.924918	0.993224	-
ENSMUSG00000015094_Npdc1	101.789	142.205	141.293	109.688	132.998	142.272	-0.00107457	0.996233	0.999082	-
ENSMUSG00000015095_Fbxw5	220.692	283.468	247.513	283.516	282.116	310.132	0.22057	0.181216	0.911908	-
ENSMUSG00000015112_Slc25a13	3626.56	3441.17	3762.79	3412.42	3298.74	3360.27	-0.104719	0.178365	0.911908	-
ENSMUSG00000015120_Ube2i	7499.93	7511.43	7367.26	7124.16	7336.02	7230.27	-0.0451439	0.347851	0.91642	-
ENSMUSG00000015126_0610007P22Rik	474.713	422.847	423.878	442.471	422.166	445.239	-0.0131101	0.919124	0.992855	-
ENSMUSG00000015127_Unkl	499.034	482.178	411.853	451.767	523.93	515.863	0.0960787	0.334319	0.91642	-
ENSMUSG00000015133_Lrrk1	34.2298	30.1361	31.0643	23.239	18.136	16.3766	-0.722156	0.111467	0.911908	-
ENSMUSG00000015143_Actn1	2651.91	3277.3	2846.9	3040.59	3089.17	3656.08	0.157056	0.224289	0.911908	-
ENSMUSG00000015149_Sirt2	137.82	185.525	144.299	139.434	154.156	121.801	-0.170667	0.436887	0.925726	-
ENSMUSG00000015165_Hnrnpl	9778.01	10665.4	7684.92	9802.22	10186.4	7719.52	-0.0217234	0.900989	0.990685	-
ENSMUSG00000015176_Nolc1	3829.23	4592.93	3285.81	4229.5	4886.65	3307.05	0.0855198	0.600259	0.95544	-
ENSMUSG00000015189_Casd1	348.603	338.09	329.683	366.247	413.098	326.508	0.121493	0.294246	0.911908	-
ENSMUSG00000015202_Cnksr3	119.804	166.69	123.255	195.208	144.081	147.389	0.24982	0.229571	0.911908	-
ENSMUSG00000015214_Mtmr1	396.345	384.236	382.793	413.655	373.804	290.685	-0.108623	0.457241	0.926853	-
ENSMUSG00000015217_Hmgb3	498.134	462.401	449.932	492.667	534.005	402.25	0.0187582	0.869832	0.987446	-
ENSMUSG00000015222_Mtap2	109.896	110.185	109.226	161.744	126.952	97.2361	0.231697	0.27317	0.911908	-
ENSMUSG00000015224_Cyp2j9	16.2141	20.7186	20.0415	18.5912	28.2116	13.306	0.0787423	0.864784	0.986832	-
ENSMUSG00000015243_Abca1	2312.31	2692.47	2143.44	2784.04	3004.54	2741.03	0.254782	0.032838	0.787957	-
ENSMUSG00000015247_Nipsnap3b	644.961	647.927	710.471	609.792	542.066	617.193	-0.17891	0.129851	0.911908	-
ENSMUSG00000015289_Lage3	663.878	735.51	738.53	704.607	686.146	505.627	-0.171896	0.179998	0.911908	-
ENSMUSG00000015290_Ubl4	463.904	443.566	433.899	392.275	461.461	438.074	-0.0558039	0.592161	0.953034	-
ENSMUSG00000015291_Gdi1	656.672	727.034	750.555	689.734	756.675	837.254	0.0975054	0.446996	0.926853	-
ENSMUSG00000015305_Sash1	277.441	364.459	272.565	322.558	385.894	279.426	0.111245	0.486958	0.934815	-
ENSMUSG00000015312_Gadd45b	859.348	642.276	716.484	581.905	441.31	516.886	-0.526181	0.0129252	0.591241	-
ENSMUSG00000015335_Zdhhc12	390.039	436.032	416.863	416.443	404.03	395.085	-0.0315856	0.803173	0.98406	-
ENSMUSG00000015337_Endog	203.577	132.787	151.313	183.124	142.066	137.154	-0.0767594	0.736655	0.973064	-
ENSMUSG00000015340_Cybb	18.9165	11.301	12.0249	7.43649	7.0529	12.2824	-0.668679	0.167968	0.911908	-
ENSMUSG00000015341_Golga7	2444.73	2094.46	2350.87	2166.81	2143.07	1890.47	-0.152053	0.157756	0.911908	-
ENSMUSG00000015342_Xk	45.94	42.3789	51.1058	55.7737	47.3552	70.6241	0.317719	0.267453	0.911908	-
ENSMUSG00000015354_Pcolce2	314.374	316.429	305.633	323.487	314.358	284.543	-0.0212434	0.859056	0.986427	-
ENSMUSG00000015357_Clpx	1897.05	1680.09	1974.09	1789.41	1756.17	1653.01	-0.0944848	0.380399	0.91642	-
ENSMUSG00000015363_Trabd	621.541	594.247	526.09	704.607	624.685	620.264	0.16231	0.123499	0.911908	-
ENSMUSG00000015365_Mov10l1	852.142	813.675	821.702	880.295	706.298	881.266	-0.0112453	0.913448	0.99135	-
ENSMUSG00000015377_Fam116b	134.217	141.263	128.266	130.139	138.035	201.637	0.217677	0.477081	0.932201	-
ENSMUSG00000015451_C4a	18.0157	16.9516	15.0311	26.9573	20.1511	19.4472	0.414691	0.2531	0.911908	-
ENSMUSG00000015452_Ager	24.3212	14.1263	19.0394	21.3799	29.2192	52.2004	0.831269	0.0395737	0.823143	-
ENSMUSG00000015461_Atf6b	620.64	631.917	566.173	600.497	687.154	645.852	0.0875926	0.487122	0.934815	-
ENSMUSG00000015468_Notch4	298.16	353.158	300.623	378.331	365.743	637.664	0.537081	0.0376383	0.816904	-
ENSMUSG00000015474_Ppt2	90.9792	82.8743	86.1785	83.6605	95.7179	116.683	0.18434	0.368888	0.91642	-
ENSMUSG00000015478_Rnf5	217.99	277.817	222.461	243.545	240.806	199.59	-0.0702794	0.760878	0.978037	-
ENSMUSG00000015488_5930434B04Rik	110.796	122.428	137.284	129.209	124.937	152.507	0.135188	0.463736	0.928088	-
ENSMUSG00000015501_Hivep2	81.9713	101.709	47.0975	51.1259	59.4459	49.1298	-0.533177	0.131153	0.911908	-
ENSMUSG00000015522_Arnt	879.165	1083.02	846.754	1114.54	1066	992.831	0.176052	0.169563	0.911908	-
ENSMUSG00000015536_Mocs2	702.612	590.48	597.237	657.2	582.368	489.251	-0.128633	0.475304	0.930641	-
ENSMUSG00000015542_Nat9	224.295	242.031	223.463	278.868	260.957	212.896	0.127348	0.369746	0.91642	-
ENSMUSG00000015568_Lpl	80.1698	101.709	103.214	144.082	127.96	153.531	0.580278	0.00147284	0.206484	-
ENSMUSG00000015575_Atp6v0e	664.779	593.305	622.289	609.792	558.187	547.593	-0.13205	0.246516	0.911908	-
ENSMUSG00000015597_Zfp318	752.155	896.55	627.299	885.872	917.885	772.771	0.178616	0.185355	0.911908	-
ENSMUSG00000015599_Ttbk1	18.0157	22.6021	9.01868	20.4503	18.136	13.306	0.0616624	0.894841	0.989609	-
ENSMUSG00000015605_Srf	1640.33	1952.26	1834.8	1636.03	1889.17	1934.49	0.00848301	0.95187	0.996074	-
ENSMUSG00000015619_Gata3	18.9165	20.7186	16.0332	18.5912	12.0907	10.2354	-0.43845	0.326371	0.91642	-
ENSMUSG00000015647_Lama5	11951.6	14925.9	13706.4	11495	13228.2	18879.1	0.103492	0.734354	0.972815	-
ENSMUSG00000015652_Steap1	654.87	646.043	815.689	711.114	645.844	693.958	-0.0446543	0.736303	0.973064	-
ENSMUSG00000015653_Steap2	1042.21	1150.82	1062.2	1110.83	1055.92	1236.43	0.0640314	0.624697	0.960643	-
ENSMUSG00000015656_Hspa8	62827	60250.6	54506.9	61367.8	59128.5	49041.8	-0.0668946	0.564238	0.946403	-
ENSMUSG00000015659_Serac1	349.504	313.604	332.689	329.994	330.479	360.285	0.0350684	0.783972	0.981434	-
ENSMUSG00000015668_Pdzd11	553.081	610.256	444.921	561.455	535.013	416.58	-0.0880154	0.632853	0.961478	-
ENSMUSG00000015671_Psma2	6589.24	5427.33	6097.63	5938.04	5142.57	4434.99	-0.22335	0.184579	0.911908	-
ENSMUSG00000015672_Mrpl32	501.737	415.313	477.99	487.09	480.605	429.886	0.00284042	0.984433	0.999082	-
ENSMUSG00000015697_Setdb1	3099.6	3434.58	2526.23	3185.61	3541.56	3231.31	0.136146	0.259317	0.911908	-
ENSMUSG00000015702_Anxa9	10.8094	10.3593	24.0498	8.36605	10.0756	14.3295	-0.461344	0.389941	0.91642	-
ENSMUSG00000015709_Arnt2	60.3525	42.3789	27.056	58.5624	53.4005	52.2004	0.334147	0.299265	0.912216	-
ENSMUSG00000015711_Prune	736.841	807.083	812.683	773.395	871.537	650.97	-0.03716	0.750984	0.976263	-
ENSMUSG00000015714_Lass2	714.322	791.073	705.461	723.199	676.071	720.57	-0.0606173	0.506637	0.93752	-
ENSMUSG00000015733_Capza2	4147.21	3612.57	4534.39	3861.4	3395.47	3607.97	-0.178187	0.157719	0.911908	-
ENSMUSG00000015745_Plekho1	71.1619	80.0491	63.1308	55.7737	54.4081	60.3887	-0.331191	0.165432	0.911908	-
ENSMUSG00000015747_Vps45	644.961	510.431	511.058	620.017	511.839	476.968	-0.0506343	0.753123	0.976635	-
ENSMUSG00000015748_Prpf3	2313.21	2651.98	2147.45	2498.66	2764.74	2188.32	0.0671508	0.617003	0.959284	-
ENSMUSG00000015749_Anp32e	3002.31	2858.22	2801.8	3118.68	3280.61	2380.75	0.0195405	0.872805	0.988391	-
ENSMUSG00000015750_Aph1a	1415.13	1340.12	1381.86	1425.02	1335.01	1382.8	0.00216879	0.973163	0.999082	-
ENSMUSG00000015755_Tab2	1247.59	1301.5	1303.7	1336.71	1446.85	1687.81	0.214555	0.0645121	0.884404	-
ENSMUSG00000015757_Ppil4	1919.57	1875.03	2028.2	1987.4	1909.32	1868.98	-0.0139783	0.883101	0.989266	-
ENSMUSG00000015759_Cnih	936.815	873.006	852.766	920.266	847.356	775.841	-0.065848	0.590174	0.952587	-
ENSMUSG00000015766_Eps8	513.447	553.751	403.836	566.103	555.164	441.145	0.0868105	0.661102	0.966165	-
ENSMUSG00000015776_Med22	2400.59	2472.1	2346.86	2279.28	2416.12	2425.78	-0.0200339	0.788779	0.982039	-
ENSMUSG00000015790_Surf1	417.964	388.944	431.895	373.684	355.668	409.415	-0.121522	0.276467	0.911908	-
ENSMUSG00000015804_Med28	1252.99	1090.55	1152.39	1226.09	1056.93	931.419	-0.120741	0.348804	0.91642	-
ENSMUSG00000015806_Qdpr	1465.58	1289.26	1257.6	1372.96	1446.85	1110.54	-0.0298568	0.822327	0.98527	-
ENSMUSG00000015837_Sqstm1	4557.07	4139.01	4900.15	4262.04	3862.97	4129.97	-0.149715	0.133052	0.911908	-
ENSMUSG00000015839_Nfe2l2	1885.34	2199	2305.78	1779.18	2099.75	2027.63	-0.113492	0.273405	0.911908	-
ENSMUSG00000015846_Rxra	674.687	722.325	667.382	706.467	663.98	545.545	-0.106985	0.392434	0.916622	-
ENSMUSG00000015850_Adamtsl4	29.7259	33.9031	16.0332	31.6051	25.1889	48.1063	0.391593	0.350324	0.91642	-
ENSMUSG00000015869_Prpsap1	1575.47	1616.05	1309.71	1610	1543.58	1314.22	-0.010797	0.931308	0.994915	-
ENSMUSG00000015879_Fam184b	20.718	22.6021	29.0602	22.3095	27.204	36.8473	0.254577	0.539532	0.941568	-
ENSMUSG00000015880_Ncapg	5235.36	4962.1	4853.05	5022.42	4854.41	4239.49	-0.0924027	0.363893	0.91642	-
ENSMUSG00000015882_Lcorl	280.144	288.177	377.782	265.855	322.418	331.626	-0.0401997	0.816388	0.98426	-
ENSMUSG00000015889_Lta4h	2081.71	1779.91	1836.8	2051.54	1752.14	1570.11	-0.0844618	0.524166	0.940442	-
ENSMUSG00000015932_Dstn	10056.4	9356.32	10362.5	9567.97	9309.83	9097.2	-0.0899359	0.350315	0.91642	-
ENSMUSG00000015937_H2afy	1079.14	1058.53	1193.47	1018.8	1020.66	1125.89	-0.0734877	0.357264	0.91642	-
ENSMUSG00000015942_Gtf2ird2	56.7494	81.9326	62.1287	54.8441	76.5743	71.6476	0.0132146	0.951205	0.995993	-
ENSMUSG00000015943_Bola1	626.946	579.179	523.083	590.271	516.877	405.321	-0.192893	0.303784	0.91227	-
ENSMUSG00000015944_Gatsl2	98.1855	102.651	95.1972	161.744	130.982	109.519	0.443554	0.0889708	0.911908	-
ENSMUSG00000015957_Wnt11	180.157	224.137	145.301	115.266	144.081	79.8359	-0.696462	0.00494571	0.403536	-
ENSMUSG00000015961_Adss	8389.9	7154.5	8116.81	7651.22	6944.08	6329.56	-0.177235	0.0917036	0.911908	-
ENSMUSG00000015966_Il17rb	9.00784	11.301	13.027	23.239	16.1209	24.5649	0.943087	0.0891772	0.911908	-
ENSMUSG00000015971_Actr8	1110.67	1073.6	1111.3	1140.57	1039.8	909.925	-0.0923595	0.465089	0.928648	-
ENSMUSG00000015980_Lrrc27	84.6737	80.9908	83.1723	73.4353	50.3779	32.7532	-0.661536	0.00890034	0.504719	-
ENSMUSG00000015981_Stk32c	18.9165	21.6603	22.0457	13.9434	23.1738	13.306	-0.313351	0.473227	0.930641	-
ENSMUSG00000015994_Fnta	2153.77	1730	1933	2008.78	1728.97	1515.86	-0.14675	0.321508	0.91642	-
ENSMUSG00000016018_Skiv2l2	5006.56	5011.07	4956.27	5124.67	4821.16	4386.88	-0.0630083	0.449923	0.926853	-
ENSMUSG00000016028_Celsr1	771.972	773.18	735.523	806.859	728.464	1168.88	0.245426	0.204572	0.911908	-
ENSMUSG00000016128_Stard13	47.7416	41.4372	42.0872	39.9711	34.2569	44.0121	-0.152576	0.531778	0.941169	-
ENSMUSG00000016150_Odz1	16.2141	16.0098	16.0332	21.3799	18.136	4.09415	-0.141477	0.836317	0.9853	-
ENSMUSG00000016181_Diexf	1779.95	1833.59	1492.09	1832.17	1760.2	1376.66	-0.0390907	0.787458	0.98147	-
ENSMUSG00000016200_Syt14	183.76	212.836	238.494	175.687	215.617	250.767	0.0153755	0.926642	0.993381	-
ENSMUSG00000016206_H2-M3	33.329	25.4274	37.0768	31.6051	30.2267	32.7532	-0.0172705	0.954938	0.996944	-
ENSMUSG00000016239_Lonrf3	99.0862	94.1754	60.1245	105.04	99.7482	87.0007	0.200909	0.367644	0.91642	-
ENSMUSG00000016252_Atp5e	64.8565	55.5635	61.1266	59.4919	85.6424	60.3887	0.177019	0.458555	0.926853	-
ENSMUSG00000016253_Th1l	1784.45	1797.81	1585.28	1676.93	1809.57	1452.4	-0.0654	0.509261	0.937592	-
ENSMUSG00000016256_Ctsz	1290.82	1232.76	1298.69	1253.05	1186.9	1189.35	-0.0744681	0.388417	0.91642	-
ENSMUSG00000016257_Slmo2	1236.78	1164.95	1197.48	1103.39	1171.79	1011.25	-0.131132	0.247066	0.911908	-
ENSMUSG00000016262_Sertad4	23.4204	29.1944	31.0643	22.3095	23.1738	25.5884	-0.23457	0.568099	0.947931	-
ENSMUSG00000016308_Ube2a	390.039	419.08	369.766	395.064	364.736	333.673	-0.107762	0.320089	0.91642	-
ENSMUSG00000016319_Slc25a5	13351.4	11385.8	12166.2	12527.7	11245.3	9249.71	-0.160266	0.261545	0.911908	-
ENSMUSG00000016344_Ppdpf	583.708	647.927	656.359	573.539	632.746	474.921	-0.166926	0.295783	0.911908	-
ENSMUSG00000016346_Kcnq2	53.1463	60.2722	43.0892	59.4919	72.5441	26.612	0.0201989	0.95545	0.996944	-
ENSMUSG00000016349_Eef1a2	5.4047	4.70877	12.0249	9.29561	11.0831	9.21184	0.432001	0.421195	0.923997	-
ENSMUSG00000016356_Col20a1	22.5196	29.1944	27.056	14.873	30.2267	53.2239	0.317208	0.583083	0.950093	-
ENSMUSG00000016382_Pls3	288.251	230.73	218.452	273.291	241.814	178.096	-0.0887927	0.610361	0.957864	-
ENSMUSG00000016386_Mpped2	23.4204	29.1944	25.0519	55.7737	37.2796	29.6826	0.663746	0.109951	0.911908	-
ENSMUSG00000016409_Nkap	781.881	739.277	817.694	777.113	674.056	671.441	-0.138831	0.147257	0.911908	-
ENSMUSG00000016427_Ndufa1	1424.14	1082.08	1234.56	1214.94	1049.87	835.207	-0.27086	0.15846	0.911908	-
ENSMUSG00000016477_E2f3	408.956	558.46	471.978	533.568	633.753	488.227	0.202098	0.198423	0.911908	-
ENSMUSG00000016481_Cr1l	840.431	820.268	787.631	843.112	753.653	665.299	-0.113629	0.323994	0.91642	-
ENSMUSG00000016487_Ppfibp1	1448.46	1408.86	1433.97	1450.12	1418.64	1202.66	-0.0754994	0.417729	0.923997	-
ENSMUSG00000016494_Cd34	102.689	120.544	59.1225	118.054	80.6046	52.2004	-0.169827	0.6528	0.965734	-
ENSMUSG00000016495_5033414D02Rik	141.423	147.855	150.311	168.251	152.141	136.13	0.0563994	0.747202	0.974955	-
ENSMUSG00000016496_Cd274	16.2141	11.301	11.0228	12.0843	23.1738	16.3766	0.412876	0.362843	0.91642	-
ENSMUSG00000016503_Gtf3a	1205.25	1155.53	1083.24	1259.56	1012.59	939.607	-0.100371	0.458111	0.926853	-
ENSMUSG00000016510_Mtif3	734.139	679.946	659.366	739.001	665.995	751.276	0.0562741	0.65838	0.966165	-
ENSMUSG00000016520_Lnx2	456.698	516.081	507.05	494.527	477.582	502.557	-0.00472482	0.973827	0.999082	-
ENSMUSG00000016526_Dyrk3	2778.92	3165.23	2960.13	3071.27	3182.87	3020.46	0.0588522	0.506687	0.93752	-
ENSMUSG00000016528_Mapkapk2	1374.6	1448.42	1459.02	1325.55	1275.57	1392.01	-0.100673	0.258988	0.911908	-
ENSMUSG00000016534_Lamp2	1116.97	1172.48	1411.92	1103.39	1130.48	1601.84	0.0514038	0.785924	0.981449	-
ENSMUSG00000016541_Atxn10	3779.69	3531.58	3955.19	3619.71	3314.86	3186.27	-0.154452	0.0689589	0.892715	-
ENSMUSG00000016552_Foxred2	387.337	424.731	442.917	435.035	491.688	585.463	0.268485	0.0318462	0.782064	-
ENSMUSG00000016554_Eif3d	9427.61	8488.97	8169.92	8715.57	8559.2	6693.93	-0.122136	0.355052	0.91642	-
ENSMUSG00000016559_H3f3b	21363.9	19757.1	20864.2	20938.4	19868	17169.8	-0.0964281	0.275792	0.911908	-
ENSMUSG00000016619_Nup50	4812.89	4728.55	4695.73	4684.99	4730.48	3931.41	-0.0930487	0.251178	0.911908	-
ENSMUSG00000016624_Phf21b	102.689	133.729	91.1889	96.6744	127.96	127.942	0.103856	0.678306	0.967566	-
ENSMUSG00000016626_Nlrp14	94.5823	35.7866	73.1515	96.6744	55.4156	60.3887	0.0638456	0.843065	0.9853	-
ENSMUSG00000016637_Ift27	206.28	188.351	162.336	216.588	176.322	163.766	-0.000449314	0.998027	0.999768	-
ENSMUSG00000016664_Pacsin2	2850.98	2708.48	3181.59	2561.87	2673.05	2472.87	-0.181304	0.0480009	0.836311	-
ENSMUSG00000016757_Ttll12	650.366	703.49	533.104	721.34	699.245	626.405	0.117217	0.456316	0.926853	-
ENSMUSG00000016831_Tox4	1461.97	1675.38	1547.2	1530.99	1534.51	1474.92	-0.0447708	0.510929	0.937592	-
ENSMUSG00000016833_Mrps18c	1147.6	926.686	1093.26	1069.93	986.398	841.348	-0.128176	0.378783	0.91642	-
ENSMUSG00000016918_Sulf1	1613.3	1519.99	1057.19	1654.62	1639.3	1025.58	0.0436974	0.845716	0.9853	-
ENSMUSG00000016921_Srsf6	9986.09	11001.6	10760.3	9772.48	10780.9	9617.16	-0.0734949	0.225809	0.911908	-
ENSMUSG00000016933_Plcg1	1984.43	2205.59	2057.26	1937.21	2144.08	2171.95	0.0011275	0.988772	0.999082	-
ENSMUSG00000016940_Kctd2	287.35	278.759	308.639	330.924	294.207	300.92	0.0838652	0.473435	0.930641	-
ENSMUSG00000016946_Kctd5	1606.1	1725.29	1588.29	1694.59	1683.63	1490.27	-0.014819	0.843391	0.9853	-
ENSMUSG00000016984_Etaa1	1557.46	1482.32	1464.03	1641.61	1647.36	1621.28	0.124478	0.135111	0.911908	-
ENSMUSG00000016995_Matn4	10.8094	12.2428	16.0332	17.6617	11.0831	16.3766	0.213689	0.667145	0.96667	-
ENSMUSG00000017009_Sdc4	3928.32	3443.99	4615.56	3664.33	3627.21	4271.22	-0.0520431	0.673257	0.96667	-
ENSMUSG00000017057_Il13ra1	84.6737	87.5831	64.1328	61.351	73.5517	62.4358	-0.263985	0.230151	0.911908	-
ENSMUSG00000017119_Nbr1	4953.41	4930.08	5205.78	5043.8	5177.84	5310.11	0.0417119	0.466476	0.928648	-
ENSMUSG00000017132_Cyth1	200.875	182.7	208.432	140.364	204.534	205.731	-0.107162	0.493681	0.935767	-
ENSMUSG00000017144_Rnd3	881.868	977.54	1090.26	855.196	976.323	957.007	-0.0808253	0.450038	0.926853	-
ENSMUSG00000017146_Brca1	2177.19	2703.78	2061.27	2358.3	2794.96	2219.03	0.0865643	0.410491	0.920517	-
ENSMUSG00000017176_Nt5c3l	458.499	419.08	406.843	438.753	409.068	408.391	-0.0323072	0.748794	0.975268	-
ENSMUSG00000017188_Ccdc56	935.915	757.17	724.501	807.789	811.083	551.687	-0.155459	0.374232	0.91642	-
ENSMUSG00000017204_Gsdma	16.2141	15.0681	7.01453	17.6617	16.1209	9.21184	0.163125	0.721786	0.971823	-
ENSMUSG00000017210_Med24	1312.44	1462.54	1401.9	1483.58	1456.93	1354.14	0.0406468	0.590743	0.952587	-
ENSMUSG00000017221_Psmd3	5262.38	5686.31	4394.1	5644.3	5456.93	4512.78	0.0252739	0.874718	0.988645	-
ENSMUSG00000017264_Exosc10	1644.83	1917.41	1515.14	1808.93	1958.69	1571.13	0.0723725	0.599756	0.95544	-
ENSMUSG00000017286_Glod4	2064.6	1604.75	1838.81	1787.55	1746.1	1634.59	-0.0919118	0.575014	0.948196	-
ENSMUSG00000017288_Vps53	422.468	461.459	401.832	426.669	430.227	322.414	-0.124075	0.359911	0.91642	-
ENSMUSG00000017291_Taok1	7832.32	8018.09	9637.96	7816.68	8273.05	9376.63	-0.00122887	0.992131	0.999082	-
ENSMUSG00000017299_Dnttip1	345.901	381.41	361.749	408.077	393.955	360.285	0.0948484	0.411097	0.920636	-
ENSMUSG00000017300_Tnnc2	20.718	19.7768	31.0643	17.6617	11.0831	18.4237	-0.593607	0.10223	0.911908	-
ENSMUSG00000017307_Acot8	608.93	541.508	550.139	547.512	515.869	557.828	-0.0695819	0.441633	0.92618	-
ENSMUSG00000017314_Mpp2	23.4204	48.0294	32.0664	44.6189	35.2645	47.0827	0.296743	0.347612	0.91642	-
ENSMUSG00000017376_Nlk	1126.88	1432.41	1333.76	1361.81	1383.38	1407.36	0.09334	0.391631	0.91642	-
ENSMUSG00000017386_Traf4	2665.42	2880.82	2710.61	2564.66	2539.04	2450.35	-0.128231	0.0787282	0.911908	-
ENSMUSG00000017390_Aldoc	187.363	141.263	380.789	142.223	148.111	324.461	-0.206443	0.681846	0.968161	-
ENSMUSG00000017400_Stac2	23.4204	26.3691	37.0768	24.1686	27.204	52.2004	0.253483	0.574084	0.948003	-
ENSMUSG00000017404_Rpl19	23182.6	23678.5	22066.7	24452.1	24210.6	19364.3	-0.0189652	0.867467	0.987167	-
ENSMUSG00000017405_Nek8	227.898	287.235	240.498	224.954	274.056	335.72	0.142736	0.504922	0.93752	-
ENSMUSG00000017412_Cacnb4	36.9321	23.5438	23.0477	38.112	24.1814	38.8944	0.273789	0.452124	0.926853	-
ENSMUSG00000017417_Plxdc1	78.3682	113.952	103.214	89.2379	100.756	158.648	0.237688	0.418299	0.923997	-
ENSMUSG00000017418_Arl5b	3668.89	3697.33	4538.4	3314.82	3524.43	3756.38	-0.16798	0.131609	0.911908	-
ENSMUSG00000017421_Zfp207	8435.84	8691.45	9007.66	8323.29	8685.14	8405.29	-0.0403237	0.480926	0.933192	-
ENSMUSG00000017428_Psmd11	2383.47	2692.47	2667.52	3065.69	2656.93	2661.2	0.115218	0.124538	0.911908	-
ENSMUSG00000017453_Pipox	351.306	432.265	399.828	409.937	413.098	528.145	0.190927	0.130063	0.911908	-
ENSMUSG00000017466_Timp2	60.3525	38.6119	51.1058	38.112	56.4232	45.0356	-0.108053	0.712702	0.97092	-
ENSMUSG00000017478_Zc3h18	2891.52	3319.68	2506.19	3176.31	3425.69	2923.22	0.127757	0.307924	0.91276	-
ENSMUSG00000017485_Top2b	3437.39	3159.58	3217.66	3136.34	2971.29	2758.43	-0.146574	0.143514	0.911908	-
ENSMUSG00000017491_Rarb	15.3133	16.9516	10.0208	13.0139	20.1511	13.306	0.130962	0.802332	0.98406	-
ENSMUSG00000017493_Igfbp4	125.209	97.0006	163.338	107.829	86.6499	170.931	-0.0773352	0.814998	0.98426	-
ENSMUSG00000017499_Cdc6	2328.53	2692.47	1998.14	2235.59	2617.63	2002.04	-0.0342272	0.788131	0.981582	-
ENSMUSG00000017548_Suz12	5678.54	5214.49	6607.69	5901.78	5834.76	6776.84	0.0811824	0.548437	0.942317	-
ENSMUSG00000017550_Atad5	1461.97	1812.88	1560.23	1784.76	1972.8	1672.46	0.167522	0.0587435	0.86066	-
ENSMUSG00000017561_Crlf3	1912.36	1774.26	1900.94	1839.6	1720.91	1618.21	-0.109244	0.169528	0.911908	-
ENSMUSG00000017615_Tnfaip1	819.713	1045.35	982.034	923.054	1007.56	1007.16	0.0454054	0.676816	0.96667	-
ENSMUSG00000017631_Abr	1040.41	1051.94	908.882	1026.24	1001.51	944.725	-0.0142081	0.869745	0.987446	-
ENSMUSG00000017639_Rab11fip4	880.066	971.89	775.606	883.083	851.386	816.783	-0.0427052	0.716107	0.971295	-
ENSMUSG00000017652_Cd40	48.6423	40.4954	55.1141	35.3233	19.1436	48.1063	-0.491539	0.166842	0.911908	-
ENSMUSG00000017664_Slc35c2	493.63	533.033	544.127	550.3	574.308	546.569	0.0897586	0.441091	0.926033	-
ENSMUSG00000017667_Zfp334	893.578	910.676	910.887	859.844	826.197	938.584	-0.0491067	0.537466	0.941568	-
ENSMUSG00000017670_Elmo2	599.021	717.616	606.256	671.143	784.887	646.876	0.128963	0.337694	0.91642	-
ENSMUSG00000017677_Wsb1	3296.87	3605.98	4746.83	3279.49	3427.71	4341.85	-0.0763245	0.660403	0.966165	-
ENSMUSG00000017679_Ttpal	433.277	503.838	474.984	472.217	449.37	502.557	0.0125425	0.910548	0.99097	-
ENSMUSG00000017686_Rhot1	2432.12	2159.44	2279.72	2264.41	2134.01	1973.38	-0.108753	0.255477	0.911908	-
ENSMUSG00000017692_Rhbdl3	61.2533	58.3887	38.0789	41.8303	64.4837	32.7532	-0.185409	0.53775	0.941568	-
ENSMUSG00000017697_Ada	352.207	341.857	243.504	352.304	309.32	211.872	-0.101939	0.617671	0.959615	-
ENSMUSG00000017707_Serinc3	2188	2451.39	2705.6	2333.2	2469.52	2301.94	-0.0476256	0.578486	0.948526	-
ENSMUSG00000017713_Tha1	52.2455	31.0779	23.0477	49.2667	38.2872	55.271	0.418171	0.194847	0.911908	-
ENSMUSG00000017715_Pgs1	2235.75	2085.04	2022.19	2345.28	2171.29	2452.4	0.135624	0.175713	0.911908	-
ENSMUSG00000017716_Birc5	2212.33	2184.87	1613.34	2126.84	2123.93	1398.15	-0.0895293	0.598442	0.954973	-
ENSMUSG00000017718_Afmid	82.8721	80.0491	132.274	67.858	72.5441	110.542	-0.234004	0.46411	0.928164	-
ENSMUSG00000017721_Pigt	528.76	597.072	634.314	496.386	582.368	706.241	0.0199769	0.909658	0.990965	-
ENSMUSG00000017723_Wfdc2	173.851	138.438	269.558	161.744	139.043	239.508	-0.106347	0.716701	0.971295	-
ENSMUSG00000017724_Etv4	2245.65	2473.99	2515.21	2143.57	2339.55	2446.25	-0.0622741	0.555449	0.943412	-
ENSMUSG00000017734_Dbndd2	77.4674	94.1754	95.1972	72.5058	100.756	88.0242	-0.0307628	0.908032	0.990965	-
ENSMUSG00000017737_Mmp9	19.8172	42.3789	63.1308	21.3799	25.1889	27.6355	-0.753322	0.0955767	0.911908	-
ENSMUSG00000017740_Slc12a5	22.5196	40.4954	20.0415	40.9007	33.2494	55.271	0.637736	0.10544	0.911908	-
ENSMUSG00000017747_Ghdc	170.248	176.108	172.357	180.335	182.368	198.566	0.113112	0.406997	0.918958	-
ENSMUSG00000017754_Pltp	536.867	526.44	646.339	447.119	473.552	768.677	-0.0174832	0.940256	0.995612	-
ENSMUSG00000017756_Slc12a7	795.392	962.472	860.783	1040.18	1272.54	1648.92	0.596974	0.000319448	0.0780122	-
ENSMUSG00000017760_Ctsa	551.28	651.694	518.073	610.722	538.036	621.287	0.0403206	0.743271	0.97364	-
ENSMUSG00000017764_Zswim1	381.032	484.061	363.753	414.584	462.469	430.909	0.0896503	0.618431	0.959615	-
ENSMUSG00000017765_Slc12a4	868.356	1130.1	1140.36	904.463	1041.81	1262.02	0.0315177	0.826507	0.9853	-
ENSMUSG00000017774_Myo1c	3866.17	4676.75	4810.96	3597.4	3963.73	4894.56	-0.100473	0.564936	0.946514	-
ENSMUSG00000017776_Crk	4575.98	4433.78	4488.3	4509.3	4273.05	3886.37	-0.0913314	0.242289	0.911908	-
ENSMUSG00000017778_Cox7c	8368.28	6769.33	7966.5	8009.1	6839.3	6287.59	-0.128409	0.437272	0.925726	-
ENSMUSG00000017781_Pitpna	1265.6	1358.01	1256.6	1337.64	1381.36	1267.14	0.0389007	0.575095	0.948196	-
ENSMUSG00000017801_Mlx	875.562	753.403	792.642	789.198	789.925	681.676	-0.0990745	0.39282	0.916777	-
ENSMUSG00000017802_Fam134c	1278.21	1268.54	1292.68	1234.46	1275.57	1355.16	0.00929428	0.896103	0.989609	-
ENSMUSG00000017817_Jph2	64.8565	48.9712	73.1515	44.6189	32.2418	52.2004	-0.533335	0.0350235	0.801321	-
ENSMUSG00000017830_Dhx58	36.9321	41.4372	26.054	31.6051	19.1436	24.5649	-0.470157	0.176338	0.911908	-
ENSMUSG00000017831_Rab5a	2683.44	2622.78	3326.89	2715.25	2513.86	2534.28	-0.152841	0.145702	0.911908	-
ENSMUSG00000017832_Hspb9	16.2141	26.3691	17.0353	25.0982	15.1134	31.7297	0.270739	0.552479	0.942757	-
ENSMUSG00000017837_Nkiras2	844.035	823.093	865.793	869.14	792.947	837.254	-0.0187303	0.827325	0.9853	-
ENSMUSG00000017843_Ppp2r5c	3781.49	3795.27	3711.69	3776.81	3639.3	2962.12	-0.121134	0.241293	0.911908	-
ENSMUSG00000017858_Ift52	666.58	765.646	599.241	599.567	684.131	557.828	-0.142011	0.275404	0.911908	-
ENSMUSG00000017861_Mybl2	8815.97	11233.2	8551.71	9950.02	11915.4	9929.34	0.152705	0.301356	0.91227	-
ENSMUSG00000017868_Sgk2	39.6345	15.0681	13.027	40.9007	16.1209	10.2354	-0.0085368	0.987811	0.999082	-
ENSMUSG00000017929_B4galt5	1313.34	1354.24	1682.48	1160.09	1254.41	1327.53	-0.217065	0.108827	0.911908	-
ENSMUSG00000017943_Gdap1l1	87.3761	103.593	131.272	76.224	93.7028	93.1419	-0.291626	0.185964	0.911908	-
ENSMUSG00000017950_Hnf4a	77.4674	46.1459	46.0955	31.6051	37.2796	17.4001	-0.976025	0.0243093	0.721191	-
ENSMUSG00000017969_Ptgis	158.538	145.03	103.214	154.307	144.081	115.66	0.0246252	0.914054	0.991377	-
ENSMUSG00000017978_Cadps2	9.90862	20.7186	7.01453	19.5208	13.0982	6.14122	0.0461678	0.94157	0.995762	-
ENSMUSG00000017999_Ddx27	3803.11	3820.7	3169.56	3767.51	4056.43	3026.6	0.00756475	0.945276	0.995993	-
ENSMUSG00000018001_Cyth3	446.789	474.644	532.102	421.091	466.499	414.533	-0.157807	0.141614	0.911908	-
ENSMUSG00000018008_Cyth4	32.4282	25.4274	12.0249	30.6755	20.1511	24.5649	0.105446	0.812631	0.98426	-
ENSMUSG00000018012_Rac3	83.7729	50.8547	46.0955	91.097	71.5366	57.3181	0.282045	0.341182	0.91642	-
ENSMUSG00000018040_Rrp7a	1961.01	1821.35	2024.19	1875.85	1695.72	1627.42	-0.158764	0.0286035	0.756262	-
ENSMUSG00000018042_Cyb5r3	1053.02	1072.66	1250.59	1060.63	1093.2	1044.01	-0.0777864	0.439685	0.925726	-
ENSMUSG00000018068_Ints2	3589.62	3460.95	3380	3341.77	3496.22	3471.84	-0.0170519	0.788275	0.981681	-
ENSMUSG00000018076_Med13l	3468.02	4809.54	4007.3	4118.89	4442.32	5122.8	0.155592	0.386288	0.91642	-
ENSMUSG00000018102_Hist1h2bc	2439.32	2784.77	2449.07	2709.67	2707.31	2205.72	-0.00949973	0.975128	0.999082	-
ENSMUSG00000018143_Mafk	421.567	379.527	421.874	305.826	344.585	390.991	-0.232825	0.108659	0.911908	-
ENSMUSG00000018160_Med1	1920.47	2088.81	1897.93	2025.51	2269.02	2099.28	0.114014	0.211357	0.911908	-
ENSMUSG00000018166_Erbb3	669.283	715.733	948.965	511.259	490.68	712.382	-0.445099	0.0292494	0.758332	-
ENSMUSG00000018167_Stard3	495.431	520.79	452.938	483.372	482.62	492.321	-0.0114219	0.911162	0.991065	-
ENSMUSG00000018169_Mfng	36.0314	41.4372	39.0809	37.1825	32.2418	11.2589	-0.522015	0.119247	0.911908	-
ENSMUSG00000018171_Vmp1	1389.91	1265.72	1578.27	1398.06	1197.99	1399.18	-0.0833256	0.474192	0.930641	-
ENSMUSG00000018189_Uchl5	2638.4	2420.31	2158.47	2321.11	2241.81	1775.84	-0.187217	0.254149	0.911908	-
ENSMUSG00000018196_Glrx2	287.35	273.109	260.54	334.642	288.161	294.779	0.160701	0.28774	0.911908	-
ENSMUSG00000018199_Trove2	2306.01	2177.33	2402.98	2433.59	2187.41	2314.22	0.0104565	0.905966	0.99087	-
ENSMUSG00000018209_Stk4	3440.99	3511.8	3542.34	3282.28	3635.27	3367.44	-0.0292718	0.620459	0.959615	-
ENSMUSG00000018217_Pmp22	16.2141	31.0779	22.0457	35.3233	21.1587	9.21184	-0.0670602	0.875913	0.988645	-
ENSMUSG00000018239_Zcchc10	181.058	254.274	202.419	211.94	203.527	172.978	-0.114695	0.487773	0.934815	-
ENSMUSG00000018286_Psmb6	6290.17	5641.11	6162.76	6255.02	5425.7	4766.61	-0.137553	0.247124	0.911908	-
ENSMUSG00000018287_Spag7	735.941	865.472	895.855	940.716	864.484	778.912	0.0508876	0.593603	0.953101	-
ENSMUSG00000018293_Pfn1	5647.02	7408.78	5390.16	6146.26	7300.76	4383.81	-0.0489229	0.812768	0.98426	-
ENSMUSG00000018322_Tomm34	1198.94	1435.23	1199.48	1188.91	1399.5	1110.54	-0.0516687	0.72219	0.971823	-
ENSMUSG00000018326_Ywhab	3041.05	3616.33	3063.34	3344.56	3685.64	2907.87	0.0319228	0.816826	0.984374	-
ENSMUSG00000018334_Ksr1	235.105	262.749	196.407	266.784	241.814	227.225	0.0836182	0.573956	0.948003	-
ENSMUSG00000018339_Gpx3	145.927	150.681	126.262	145.941	210.579	162.742	0.294931	0.231208	0.911908	-
ENSMUSG00000018340_Anxa6	2879.81	2651.98	2746.69	2714.32	2598.49	2585.46	-0.0677926	0.333945	0.91642	-
ENSMUSG00000018341_Il12rb2	96.3839	105.476	94.1951	115.266	113.854	113.613	0.211071	0.335964	0.91642	-
ENSMUSG00000018347_Zkscan6	199.974	187.409	210.436	217.517	207.557	238.484	0.150666	0.265911	0.911908	-
ENSMUSG00000018362_Kpna2	3504.95	3109.67	3848.97	3215.35	3051.89	3079.82	-0.162675	0.180011	0.911908	-
ENSMUSG00000018363_Smurf2	1813.28	1765.79	1829.79	1745.72	1687.66	1577.27	-0.109965	0.138658	0.911908	-
ENSMUSG00000018372_Ccdc45	442.285	490.654	383.795	469.428	515.869	484.133	0.157312	0.218379	0.911908	-
ENSMUSG00000018377_Vezf1	613.434	702.548	682.413	603.285	592.444	662.229	-0.105019	0.367687	0.91642	-
ENSMUSG00000018378_Cuedc1	68.4596	100.768	77.1598	73.4353	99.7482	73.6947	0.00237696	0.992019	0.999082	-
ENSMUSG00000018379_Srsf1	17126.6	15417.5	17033.3	16033.1	14834.3	13890.4	-0.147508	0.124401	0.911908	-
ENSMUSG00000018381_Abi3	54.9478	79.1073	78.1619	38.112	38.2872	51.1769	-0.734137	0.00348688	0.340612	-
ENSMUSG00000018387_Shroom1	23.4204	19.7768	17.0353	23.239	14.1058	18.4237	-0.110226	0.796052	0.982957	-
ENSMUSG00000018395_Kif3a	424.269	420.964	557.154	442.471	430.227	479.016	-0.0525047	0.766256	0.979227	-
ENSMUSG00000018398_Sept8	642.259	751.52	848.758	633.031	694.207	688.841	-0.153115	0.233758	0.911908	-
ENSMUSG00000018401_Mtmr4	1046.71	1083.02	989.048	1036.46	1093.2	1031.73	0.0192673	0.835247	0.9853	-
ENSMUSG00000018405_Mrm1	327.885	217.545	287.596	301.178	283.124	306.038	0.0955799	0.563236	0.946352	-
ENSMUSG00000018411_Mapt	623.343	627.208	610.264	636.749	602.519	494.369	-0.10139	0.393663	0.917022	-
ENSMUSG00000018412_1700081L11Rik	1672.76	1815.7	1937.01	1791.26	2023.17	2415.55	0.199418	0.204869	0.911908	-
ENSMUSG00000018415_4933439F18Rik	1173.72	1118.8	1154.39	1187.05	1229.22	1090.07	0.0248141	0.750866	0.976203	-
ENSMUSG00000018417_Myo1b	2331.23	2110.47	2325.82	2223.51	2220.66	2226.19	-0.0208351	0.772105	0.980248	-
ENSMUSG00000018425_Dhx40	1807.87	1490.8	1655.43	1579.32	1430.73	1536.33	-0.123916	0.270635	0.911908	-
ENSMUSG00000018427_Ypel2	143.225	180.817	146.303	164.532	174.307	135.107	0.0115545	0.953629	0.996141	-
ENSMUSG00000018428_Akap1	5120.06	5147.63	5714.84	5178.59	5169.78	6010.21	0.0335632	0.670276	0.96667	-
ENSMUSG00000018433_Nol11	4394.02	4012.81	3908.09	4219.28	3940.56	3535.3	-0.0744696	0.520535	0.939947	-
ENSMUSG00000018442_Derl2	934.113	860.763	1020.11	978.828	904.786	1166.83	0.115916	0.351129	0.91642	-
ENSMUSG00000018446_C1qbp	2077.21	2424.07	1927.99	2410.35	2381.87	2104.39	0.101232	0.430631	0.925726	-
ENSMUSG00000018449_Rpain	352.207	343.74	362.751	354.163	339.547	382.803	0.0240328	0.833984	0.9853	-
ENSMUSG00000018451_6330403K07Rik	19.8172	25.4274	36.0747	41.8303	28.2116	27.6355	0.276772	0.387147	0.91642	-
ENSMUSG00000018470_Kcnab3	64.8565	80.0491	83.1723	43.6894	67.5063	62.4358	-0.394852	0.189569	0.911908	-
ENSMUSG00000018474_Chd3	329.687	339.031	257.533	282.587	261.965	291.708	-0.148661	0.320477	0.91642	-
ENSMUSG00000018476_Kdm6b	233.303	339.973	371.77	403.43	360.705	734.9	0.665669	0.101754	0.911908	-
ENSMUSG00000018481_Appbp2	4153.52	4306.64	4503.33	4301.08	4264.99	4057.3	-0.0380991	0.542217	0.942137	-
ENSMUSG00000018500_Adora2b	45.94	24.4856	18.0374	37.1825	27.204	41.965	0.25803	0.474667	0.930641	-
ENSMUSG00000018501_Ncor1	4110.28	5464.06	4291.89	4885.77	6022.17	5523.01	0.244799	0.111719	0.911908	-
ENSMUSG00000018507_Trpv2	61.2533	61.214	70.1453	72.5058	81.6121	61.4122	0.164496	0.438203	0.925726	-
ENSMUSG00000018509_Cenpv	823.317	827.802	874.812	847.76	814.106	854.654	-0.00484645	0.948367	0.995993	-
ENSMUSG00000018537_Pcgf2	235.105	331.497	214.444	281.657	286.146	320.367	0.184851	0.404098	0.918958	-
ENSMUSG00000018541_Cwc25	907.09	974.715	955.98	904.463	872.544	925.278	-0.0703876	0.431561	0.925726	-
ENSMUSG00000018547_Pip4k2b	2206.92	2243.26	2170.5	2133.34	2226.7	1977.47	-0.0630201	0.43702	0.925726	-
ENSMUSG00000018548_Trim37	3027.54	2921.32	3123.47	2961.58	2865.49	2932.43	-0.0504719	0.448362	0.926853	-
ENSMUSG00000018554_Ybx2	33.329	31.0779	31.0643	41.8303	40.3023	38.8944	0.342094	0.196146	0.911908	-
ENSMUSG00000018559_Ctdnep1	223.394	226.021	205.425	229.602	242.821	291.708	0.221502	0.230995	0.911908	-
ENSMUSG00000018565_Rai12	1680.86	1640.54	1697.52	1543.07	1554.66	1331.62	-0.179812	0.0149904	0.630325	-
ENSMUSG00000018566_Slc2a4	25.222	21.6603	23.0477	21.3799	21.1587	40.9415	0.250102	0.50124	0.93752	-
ENSMUSG00000018567_Gabarap	1028.7	899.375	977.024	925.843	879.597	843.395	-0.133009	0.161472	0.911908	-
ENSMUSG00000018569_Cldn7	39.6345	48.9712	54.1121	33.4642	29.2192	40.9415	-0.460372	0.12803	0.911908	-
ENSMUSG00000018570_2810408A11Rik	28.8251	38.6119	49.1017	31.6051	35.2645	39.918	-0.123458	0.700492	0.969793	-
ENSMUSG00000018572_Phf23	3234.72	3120.03	3301.84	3132.62	3058.94	2845.43	-0.0955086	0.262087	0.911908	-
ENSMUSG00000018574_Acadvl	824.217	676.179	691.432	712.044	631.738	632.546	-0.149358	0.263335	0.911908	-
ENSMUSG00000018581_Dnahc11	41.4361	54.6217	49.1017	60.4215	36.2721	40.9415	-0.0715971	0.813337	0.98426	-
ENSMUSG00000018583_G3bp1	18550.7	17627.7	18458.2	18435.1	17696.7	16234.3	-0.0611887	0.354549	0.91642	-
ENSMUSG00000018585_Atox1	2140.26	1748.84	1772.67	2073.85	1735.01	1380.75	-0.125451	0.405736	0.918958	-
ENSMUSG00000018593_Sparc	5082.22	4676.75	6234.91	4440.51	4368.77	5437.03	-0.166911	0.277862	0.911908	-
ENSMUSG00000018599_Smcr7	595.418	471.819	524.085	488.949	481.612	534.287	-0.0812525	0.539431	0.941568	-
ENSMUSG00000018604_Tbx3	1716.89	2433.49	2371.91	2451.25	2807.05	3556.79	0.43461	0.0466458	0.833355	-
ENSMUSG00000018648_Dusp14	33.329	37.6702	27.056	35.3233	38.2872	37.8709	0.18148	0.523667	0.940046	-
ENSMUSG00000018651_Tada2a	516.149	540.567	530.098	552.159	520.907	495.392	-0.0158491	0.864609	0.986812	-
ENSMUSG00000018659_Pnpo	736.841	673.354	593.229	703.678	656.927	624.358	-0.0136206	0.921587	0.99319	-
ENSMUSG00000018661_Cog1	564.792	699.723	572.185	633.031	642.821	626.405	0.050536	0.637482	0.962307	-
ENSMUSG00000018666_Cbx1	4718.31	4510.06	4467.25	4645.02	4684.13	3729.77	-0.0686275	0.57399	0.948003	-
ENSMUSG00000018669_Cdk5rap3	1660.14	1531.29	1593.3	1544	1624.18	1553.73	-0.019374	0.764829	0.979127	-
ENSMUSG00000018677_Slc25a39	2553.72	3088.01	2786.77	2811.92	3093.2	2653.01	0.0220604	0.872066	0.988097	-
ENSMUSG00000018678_Sp2	89.1776	116.777	87.1806	108.759	117.884	129.989	0.281652	0.224722	0.911908	-
ENSMUSG00000018697_Aatf	1516.02	1423.93	1301.7	1430.59	1367.26	1141.24	-0.106677	0.310015	0.914039	-
ENSMUSG00000018707_Dync1h1	15428.6	17717.2	15039.1	16120.5	18414.1	19931.3	0.176746	0.212344	0.911908	-
ENSMUSG00000018727_Cpsf4l	163.042	140.321	80.166	154.307	147.103	138.178	0.193944	0.39667	0.918111	-
ENSMUSG00000018733_Pex12	338.695	355.983	363.753	330.924	351.637	368.473	-0.0103477	0.929172	0.99397	-
ENSMUSG00000018736_Ndel1	949.426	890.899	1048.17	800.352	772.796	874.101	-0.238979	0.0250392	0.726015	-
ENSMUSG00000018740_Slc25a35	116.201	113.952	93.193	105.04	119.899	89.0478	-0.0434302	0.84748	0.9853	-
ENSMUSG00000018750_Zbtb4	74.7651	101.709	117.243	81.8014	144.081	181.166	0.470562	0.249689	0.911908	-
ENSMUSG00000018752_BC096441	106.293	115.836	86.1785	143.152	75.5668	102.354	0.0605152	0.78551	0.981449	-
ENSMUSG00000018761_Mpdu1	896.28	763.762	805.669	845.901	825.189	747.182	-0.0280138	0.775504	0.98095	-
ENSMUSG00000018765_Fxr2	4191.35	4032.59	3946.17	4080.77	4011.08	3924.24	-0.0184381	0.73818	0.973064	-
ENSMUSG00000018770_Atp5g3	3960.75	4089.09	3784.84	3833.51	4002.02	3091.08	-0.115122	0.333356	0.91642	-
ENSMUSG00000018774_Cd68	55.8486	85.6996	63.1308	66.9284	66.4988	63.4593	-0.0551006	0.819044	0.984874	-
ENSMUSG00000018796_Acsl1	581.006	505.722	568.177	503.822	467.507	528.145	-0.142393	0.123932	0.911908	-
ENSMUSG00000018800_Abca5	345.901	399.304	442.917	308.614	342.569	450.356	-0.109446	0.517328	0.939619	-
ENSMUSG00000018809_Smyd4	497.233	453.925	447.928	501.963	441.31	410.438	-0.0467366	0.626567	0.960889	-
ENSMUSG00000018820_Zfyve27	697.207	672.412	652.351	638.609	620.655	927.325	0.112448	0.543066	0.942137	-
ENSMUSG00000018821_Avpi1	965.64	804.258	853.768	923.054	814.106	828.042	-0.0324473	0.777926	0.981434	-
ENSMUSG00000018822_Sfrp5	30.6267	27.3109	18.0374	26.0277	16.1209	21.4943	-0.256178	0.600809	0.95544	-
ENSMUSG00000018830_Myh11	21.6188	20.7186	19.0394	27.8868	22.1663	18.4237	0.160895	0.661425	0.966165	-
ENSMUSG00000018841_Rad51l3	217.089	206.244	217.45	250.052	227.708	210.849	0.105715	0.366429	0.91642	-
ENSMUSG00000018844_Fndc8	11.7102	16.0098	22.0457	22.3095	21.1587	31.7297	0.600889	0.123975	0.911908	-
ENSMUSG00000018845_Unc45b	81.9713	51.7965	55.1141	70.6467	57.4308	67.5535	0.0482029	0.845617	0.9853	-
ENSMUSG00000018846_Pank3	3057.26	3001.37	3304.84	2881.64	2963.23	3226.19	-0.0457841	0.646993	0.965511	-
ENSMUSG00000018848_Rars	5449.74	5256.87	4874.09	5181.37	5023.68	3959.04	-0.13749	0.355286	0.91642	-
ENSMUSG00000018849_Wwc1	735.941	875.831	866.795	777.113	718.388	875.124	-0.0640967	0.683876	0.968738	-
ENSMUSG00000018858_Ict1	848.539	795.782	704.459	791.986	763.728	569.087	-0.144383	0.270934	0.911908	-
ENSMUSG00000018861_Fdxr	299.961	313.604	330.685	334.642	291.184	319.344	0.00272744	0.982502	0.999082	-
ENSMUSG00000018865_Sult4a1	600.823	539.625	506.048	544.723	550.126	398.156	-0.141046	0.389033	0.91642	-
ENSMUSG00000018882_Mrpl45	2275.38	2364.74	1883.9	2305.31	2218.64	1723.64	-0.0624414	0.68196	0.968161	-
ENSMUSG00000018899_Irf1	1310.64	1347.65	1272.64	859.844	733.502	785.053	-0.724442	1.74699e-12	5.29024e-09	R
ENSMUSG00000018900_Slc22a5	158.538	146.914	167.347	142.223	145.088	167.86	-0.0553144	0.741638	0.97364	-
ENSMUSG00000018906_P4ha2	522.455	378.585	371.77	448.978	342.569	345.956	-0.162126	0.403014	0.918958	-
ENSMUSG00000018909_Arrb1	351.306	303.245	335.695	330.924	306.297	346.979	-0.00908671	0.94118	0.99567	-
ENSMUSG00000018920_Cxcl16	35.1306	48.0294	54.1121	36.2529	38.2872	49.1298	-0.149609	0.658216	0.966165	-
ENSMUSG00000018921_Pelp1	1204.35	1437.12	1264.62	1470.57	1553.65	1385.87	0.175136	0.239012	0.911908	-
ENSMUSG00000018923_Med11	339.596	325.847	357.741	350.445	345.592	306.038	-0.0292619	0.836738	0.9853	-
ENSMUSG00000018931_Gm16515	621.541	696.898	631.308	789.198	771.789	755.371	0.248668	0.0757192	0.909171	-
ENSMUSG00000018932_Map2k3	626.045	782.597	593.229	669.284	752.645	628.452	0.0343616	0.826404	0.9853	-
ENSMUSG00000018965_Ywhah	4230.98	3981.74	4002.29	3979.45	4039.3	3398.14	-0.0974219	0.270427	0.911908	-
ENSMUSG00000018974_Sart3	2046.58	2312.95	1592.3	2116.61	2285.14	1774.81	0.0533247	0.708909	0.97056	-
ENSMUSG00000018983_E2f2	964.74	1233.7	937.943	789.198	935.013	726.712	-0.355896	0.0166014	0.644518	-
ENSMUSG00000018986_Slfn3	18.0157	10.3593	14.0291	18.5912	19.1436	17.4001	0.376291	0.388569	0.91642	-
ENSMUSG00000018995_Nars2	425.17	346.565	412.855	484.301	395.97	467.757	0.186794	0.210759	0.911908	-
ENSMUSG00000018999_Slc35b4	614.335	653.577	576.193	657.2	683.124	712.382	0.153388	0.05332	0.850451	-
ENSMUSG00000019027_Dnahc1	28.8251	54.6217	49.1017	38.112	48.3627	41.965	-0.0435443	0.892084	0.989538	-
ENSMUSG00000019039_Dalrd3	443.186	499.13	486.007	419.232	467.507	499.486	-0.0435912	0.722459	0.971823	-
ENSMUSG00000019054_Fis1	1519.62	1351.42	1533.18	1431.52	1290.68	1162.74	-0.180639	0.1526	0.911908	-
ENSMUSG00000019055_Plod1	324.282	348.449	348.722	341.149	336.524	404.297	0.0827499	0.519357	0.939947	-
ENSMUSG00000019066_Rab3d	100.888	117.719	85.1764	119.913	84.6348	92.1184	-0.0330067	0.88019	0.989266	-
ENSMUSG00000019080_Mfsd3	123.407	118.661	141.293	122.702	104.786	185.26	0.105963	0.624281	0.960528	-
ENSMUSG00000019082_Slc25a22	107.193	171.399	100.208	138.505	179.345	159.672	0.332818	0.16477	0.911908	-
ENSMUSG00000019087_Atp6ap1	619.739	697.84	735.523	627.454	633.753	749.229	-0.0301689	0.774263	0.98095	-
ENSMUSG00000019088_Dnase1l1	20.718	29.1944	34.0706	30.6755	39.2947	38.8944	0.37749	0.207569	0.911908	-
ENSMUSG00000019124_Scrn1	393.643	351.274	255.529	424.81	382.872	236.437	0.0616404	0.807582	0.98406	-
ENSMUSG00000019132_BC005537	2746.49	3118.15	3146.52	2921.61	3109.32	3687.81	0.109011	0.346406	0.91642	-
ENSMUSG00000019139_Isyna1	1410.63	1664.08	1303.7	1248.4	1319.9	1111.56	-0.250787	0.098795	0.911908	-
ENSMUSG00000019143_Hars2	544.074	510.431	531.1	520.554	490.68	705.217	0.113915	0.499501	0.937447	-
ENSMUSG00000019158_Tmem160	571.097	517.965	491.017	578.187	517.884	492.321	0.00763958	0.946731	0.995993	-
ENSMUSG00000019173_Rab5c	2574.44	2708.48	2338.84	2475.42	2591.44	2032.75	-0.102372	0.415565	0.921883	-
ENSMUSG00000019179_Mdh2	3591.43	3420.45	3157.54	3733.12	3620.15	3019.44	0.0285746	0.819684	0.984897	-
ENSMUSG00000019188_H13	632.35	839.103	762.579	736.213	794.963	856.701	0.0961362	0.439669	0.925726	-
ENSMUSG00000019189_Rnf145	1408.83	1334.47	1216.52	1513.33	1438.79	1210.84	0.0722349	0.487329	0.934815	-
ENSMUSG00000019194_Scn1b	61.2533	61.214	72.1494	50.1963	49.3703	79.8359	-0.118889	0.654502	0.965734	-
ENSMUSG00000019210_Atp6v1e1	2231.24	1808.17	2143.44	1935.35	1672.54	1708.28	-0.217713	0.077798	0.911908	-
ENSMUSG00000019214_Chtf18	1902.46	2110.47	1805.74	1915.83	2139.04	1953.93	0.0462374	0.698341	0.969793	-
ENSMUSG00000019235_Rps6kl1	71.1619	60.2722	68.1411	90.1674	68.5139	58.3416	0.125143	0.559165	0.944941	-
ENSMUSG00000019254_Ppp1r12c	1190.84	1139.52	1179.44	1170.32	1105.29	1282.49	0.0196218	0.873165	0.988391	-
ENSMUSG00000019256_Ahr	54.9478	50.8547	56.1162	59.4919	74.5592	73.6947	0.357669	0.127385	0.911908	-
ENSMUSG00000019261_Mtap1s	761.163	1047.23	776.608	967.673	944.081	1011.25	0.177228	0.282106	0.911908	-
ENSMUSG00000019295_Tmem129	354.008	343.74	339.704	345.797	355.668	367.45	0.0424284	0.716609	0.971295	-
ENSMUSG00000019297_2610027L16Rik	1787.16	1730	1540.19	1621.15	1563.73	1442.16	-0.128418	0.122791	0.911908	-
ENSMUSG00000019301_Hsd17b1	20.718	20.7186	27.056	21.3799	16.1209	13.306	-0.420404	0.2398	0.911908	-
ENSMUSG00000019302_Atp6v0a1	408.055	501.955	484.002	483.372	491.688	574.204	0.152452	0.246255	0.911908	-
ENSMUSG00000019303_Psmc3ip	621.541	651.694	577.195	627.454	633.753	506.651	-0.0655798	0.568283	0.947931	-
ENSMUSG00000019312_Grb7	185.562	208.128	168.349	125.491	171.285	115.66	-0.447542	0.0246525	0.726015	-
ENSMUSG00000019320_Noxo1	27.9243	48.9712	28.0581	31.6051	43.325	25.5884	-0.0630718	0.842904	0.9853	-
ENSMUSG00000019326_Aoc3	9.00784	7.53403	10.0208	10.2252	17.1285	36.8473	1.26979	0.0439286	0.823143	-
ENSMUSG00000019338_Zfp687	744.948	849.462	725.503	790.127	806.046	1040.94	0.184461	0.232106	0.911908	-
ENSMUSG00000019362_D8Ertd738e	1243.08	1099.97	1019.11	1286.51	1166.75	877.172	-0.0135394	0.932446	0.995106	-
ENSMUSG00000019368_Sec14l4	30.6267	26.3691	36.0747	26.0277	18.136	30.7061	-0.312261	0.393969	0.91714	-
ENSMUSG00000019370_Calm3	6529.78	6185.44	5935.29	6682.62	6204.54	4623.32	-0.0909405	0.523234	0.939947	-
ENSMUSG00000019373_Cops3	4784.06	4167.26	4395.1	4665.47	4258.94	3473.89	-0.10623	0.42797	0.925018	-
ENSMUSG00000019428_Fkbp8	4079.65	4085.33	3478.2	4324.32	4141.06	3345.94	0.0207058	0.85615	0.985753	-
ENSMUSG00000019432_Ddx39b	3626.56	4233.18	3381	3615.99	4357.68	3287.6	0.00257802	0.98443	0.999082	-
ENSMUSG00000019433_Gipc1	1306.14	1325.05	1488.08	1368.31	1211.08	1426.81	-0.0397181	0.674225	0.96667	-
ENSMUSG00000019437_Tlcd1	573.799	613.082	529.096	549.371	718.388	714.429	0.206971	0.126928	0.911908	-
ENSMUSG00000019461_Plscr3	142.324	113.952	102.212	100.393	98.7406	155.578	-0.018556	0.938176	0.995612	-
ENSMUSG00000019464_Ptger1	180.157	172.341	137.284	141.293	144.081	153.531	-0.161075	0.315001	0.915935	-
ENSMUSG00000019467_Arhgef25	329.687	400.245	332.689	322.558	382.872	313.202	-0.0613877	0.638631	0.962323	-
ENSMUSG00000019470_Xab2	2730.28	2813.96	2435.04	2729.19	2831.24	2429.88	0.00192533	0.985181	0.999082	-
ENSMUSG00000019471_Cdc37	3150.04	3246.23	2588.36	3196.76	3197.99	2233.36	-0.0584002	0.764493	0.979127	-
ENSMUSG00000019478_Rab4a	254.922	276.876	256.531	319.769	313.35	226.202	0.125385	0.462247	0.927736	-
ENSMUSG00000019487_Trip10	900.784	1060.41	1171.43	831.028	871.537	1030.7	-0.196643	0.140155	0.911908	-
ENSMUSG00000019494_Cops6	1682.66	1812.88	1561.23	1676	1694.71	1253.83	-0.1288	0.400316	0.918958	-
ENSMUSG00000019505_Ubb	20755.9	23674.7	18205.7	22875.6	24171.3	16685.7	0.0250337	0.881341	0.989266	-
ENSMUSG00000019518_Ap4m1	674.687	695.014	701.453	710.185	757.683	789.147	0.123749	0.257382	0.911908	-
ENSMUSG00000019528_Gyg	108.094	115.836	103.214	96.6744	115.869	96.2125	-0.0845737	0.661041	0.966165	-
ENSMUSG00000019539_Rcn3	406.254	398.362	387.803	398.782	353.653	374.615	-0.0809261	0.438936	0.925726	-
ENSMUSG00000019558_Slc6a8	1827.69	2137.78	2382.94	2042.25	1963.73	2751.27	0.0900658	0.641829	0.962946	-
ENSMUSG00000019564_Arid3a	436.88	460.518	449.932	375.543	455.416	416.58	-0.111672	0.373156	0.91642	-
ENSMUSG00000019577_Pdk4	224.295	257.099	221.459	218.447	231.738	276.355	0.04664	0.775759	0.981021	-
ENSMUSG00000019578_Ubxn6	1376.4	1460.66	1289.67	1406.43	1505.29	1442.16	0.0766428	0.246612	0.911908	-
ENSMUSG00000019579_D17Wsu104e	753.055	586.713	709.469	633.031	583.376	683.723	-0.109163	0.423598	0.924187	-
ENSMUSG00000019590_Cyb561	343.199	296.652	382.793	310.473	242.821	312.179	-0.239164	0.0563757	0.855295	-
ENSMUSG00000019647_Sema6a	10.8094	28.2526	19.0394	16.7321	22.1663	21.4943	0.056215	0.917469	0.991827	-
ENSMUSG00000019659_Ccdc12	797.194	691.247	672.393	720.41	720.403	596.722	-0.0848417	0.506809	0.93752	-
ENSMUSG00000019689_1110001J03Rik	314.374	295.711	323.67	326.276	263.98	237.461	-0.172563	0.339041	0.91642	-
ENSMUSG00000019699_Akt3	602.625	619.674	704.459	701.819	647.859	642.781	0.0499431	0.592636	0.953034	-
ENSMUSG00000019710_Mrpl24	2196.11	1941.9	2056.26	2035.74	1913.35	1817.8	-0.103014	0.239421	0.911908	-
ENSMUSG00000019715_Gle1	2188	2359.09	2086.32	2135.2	2371.79	2175.02	0.0102453	0.896185	0.989609	-
ENSMUSG00000019718_2810055F11Rik	42.3368	43.3207	49.1017	46.4781	46.3476	38.8944	-0.0294347	0.905903	0.99087	-
ENSMUSG00000019726_Lyst	448.59	393.653	431.895	410.866	517.884	533.263	0.197128	0.121224	0.911908	-
ENSMUSG00000019731_Slc35e1	1719.6	1747.9	1808.75	1756.87	1752.14	1933.46	0.0446708	0.458046	0.926853	-
ENSMUSG00000019732_Calr3	45.0392	36.7284	35.0726	45.5485	31.2343	51.1769	0.129028	0.652931	0.965734	-
ENSMUSG00000019734_Tmc4	16.2141	29.1944	26.054	26.0277	25.1889	37.8709	0.318903	0.503049	0.93752	-
ENSMUSG00000019737_AI428936	83.7729	90.4084	83.1723	98.5335	96.7255	98.2596	0.189629	0.343166	0.91642	-
ENSMUSG00000019738_Polr2i	661.175	574.47	625.295	661.848	620.655	477.992	-0.0794226	0.569172	0.948003	-
ENSMUSG00000019761_Krt10	46.8408	34.8449	21.0436	20.4503	38.2872	17.4001	-0.438141	0.293206	0.911908	-
ENSMUSG00000019763_Rmnd1	450.392	409.663	391.811	521.484	456.423	456.498	0.196375	0.114383	0.911908	-
ENSMUSG00000019769_Syne1	373.825	393.653	295.612	400.641	354.66	383.827	0.098968	0.507833	0.937592	-
ENSMUSG00000019773_Fbxo5	635.954	671.47	588.218	642.327	692.192	590.581	0.0218319	0.805548	0.98406	-
ENSMUSG00000019774_Mtrf1l	246.815	193.06	197.409	230.531	246.851	184.237	0.053632	0.777449	0.981434	-
ENSMUSG00000019777_Hdac2	4125.59	3716.16	3809.89	4221.14	3488.16	3073.68	-0.111646	0.401968	0.918958	-
ENSMUSG00000019782_Rwdd1	1381.8	1196.03	1350.8	1319.05	1223.17	994.878	-0.151077	0.245094	0.911908	-
ENSMUSG00000019785_Clvs2	54.047	43.3207	39.0809	58.5624	49.3703	73.6947	0.408937	0.149673	0.911908	-
ENSMUSG00000019789_Hey2	15.3133	38.6119	32.0664	27.8868	22.1663	17.4001	-0.344935	0.479853	0.932563	-
ENSMUSG00000019790_Stxbp5	97.2847	99.8259	108.224	82.731	95.7179	105.424	-0.106181	0.605643	0.956608	-
ENSMUSG00000019791_Hint3	172.05	131.846	141.293	180.335	110.831	117.707	-0.120572	0.551055	0.94251	-
ENSMUSG00000019792_Trmt11	976.45	832.51	915.897	931.42	879.597	809.618	-0.056071	0.648827	0.965511	-
ENSMUSG00000019794_Katna1	1819.58	1540.71	1978.1	1642.53	1500.25	1555.78	-0.183924	0.130021	0.911908	-
ENSMUSG00000019795_Pcmt1	1389.91	1169.66	1447	1277.22	1108.31	1228.24	-0.148607	0.244124	0.911908	-
ENSMUSG00000019796_Lrp11	804.4	810.85	1003.08	846.83	856.424	1034.8	0.0646822	0.650306	0.965511	-
ENSMUSG00000019797_1700021F05Rik	367.52	319.255	343.712	359.74	329.471	273.284	-0.0979018	0.590566	0.952587	-
ENSMUSG00000019802_Sec63	777.377	755.287	863.789	874.717	826.197	953.937	0.148013	0.174484	0.911908	-
ENSMUSG00000019804_Snx3	1875.43	1878.8	1764.65	1801.49	1749.12	1349.02	-0.171497	0.16921	0.911908	-
ENSMUSG00000019806_Aig1	97.2847	93.2336	136.282	120.843	101.763	159.672	0.227629	0.322229	0.91642	-
ENSMUSG00000019808_Adat2	248.616	272.167	252.523	295.6	234.761	224.155	-0.0333656	0.811264	0.98426	-
ENSMUSG00000019809_Pex3	263.029	226.021	334.693	241.686	294.207	325.485	0.0645338	0.694709	0.969793	-
ENSMUSG00000019810_Fuca2	199.073	158.215	213.442	128.279	181.36	170.931	-0.249319	0.206762	0.911908	-
ENSMUSG00000019813_Cep57l1	460.301	448.275	400.83	397.852	427.204	274.308	-0.251967	0.143825	0.911908	-
ENSMUSG00000019814_Ltv1	1513.32	1556.72	1498.1	1593.27	1615.11	1317.29	-0.0131742	0.885663	0.989266	-
ENSMUSG00000019817_Plagl1	130.614	199.652	148.307	204.503	291.184	350.05	0.820856	0.00327912	0.334865	-
ENSMUSG00000019818_Cd164	3606.74	3815.04	4147.59	3771.23	3757.18	4047.07	0.000870191	0.991926	0.999082	-
ENSMUSG00000019820_Utrn	3495.04	3715.22	3487.22	3732.19	3702.77	3748.19	0.0640268	0.257296	0.911908	-
ENSMUSG00000019822_Smpd2	509.844	564.111	484.002	494.527	554.156	576.252	0.0593407	0.553712	0.943026	-
ENSMUSG00000019823_Mical1	623.343	695.956	619.283	697.171	753.653	758.441	0.188186	0.111604	0.911908	-
ENSMUSG00000019826_Zbtb24	505.34	606.489	544.127	576.328	643.829	650.97	0.175958	0.137222	0.911908	-
ENSMUSG00000019831_Wasf1	181.958	195.885	169.351	252.841	237.783	184.237	0.303458	0.0567315	0.857133	-
ENSMUSG00000019832_Rab32	42.3368	44.2624	39.0809	31.6051	18.136	28.659	-0.678432	0.0448258	0.828433	-
ENSMUSG00000019837_Gtf3c6	417.063	453.925	484.002	474.076	487.658	366.426	-0.0277265	0.847691	0.9853	-
ENSMUSG00000019838_Slc16a10	62.1541	54.6217	46.0955	66.9284	56.4232	62.4358	0.18799	0.434706	0.925726	-
ENSMUSG00000019841_Rev3l	2026.76	2286.58	2101.35	2213.29	2429.22	2540.42	0.163053	0.126559	0.911908	-
ENSMUSG00000019842_Traf3ip2	291.854	324.905	311.645	290.953	218.64	234.39	-0.317642	0.0400118	0.823143	-
ENSMUSG00000019843_Fyn	381.932	397.42	399.828	349.515	396.978	362.332	-0.0890394	0.405746	0.918958	-
ENSMUSG00000019845_Tube1	147.729	165.749	148.307	138.505	134.005	159.672	-0.0962324	0.615689	0.959167	-
ENSMUSG00000019846_Lama4	35.1306	49.913	43.0892	34.3938	32.2418	30.7061	-0.393329	0.153776	0.911908	-
ENSMUSG00000019849_Prep	855.745	888.074	827.714	930.491	881.612	930.396	0.0927585	0.263504	0.911908	-
ENSMUSG00000019850_Tnfaip3	60.3525	74.3985	65.1349	72.5058	75.5668	74.7182	0.156676	0.478931	0.932201	-
ENSMUSG00000019851_Perp	1918.67	1642.42	1699.52	1703.89	1598.99	1404.29	-0.160253	0.138485	0.911908	-
ENSMUSG00000019852_D10Bwg1379e	88.2768	107.36	88.1826	125.491	120.907	119.754	0.367671	0.0366853	0.81088	-
ENSMUSG00000019853_Hebp2	84.6737	94.1754	113.235	82.731	78.5895	89.0478	-0.21989	0.263702	0.911908	-
ENSMUSG00000019854_Reps1	600.823	684.655	647.341	620.947	699.245	656.087	0.0319758	0.774538	0.98095	-
ENSMUSG00000019856_Fam184a	72.0627	88.5249	81.1681	65.9989	114.862	80.8595	0.11277	0.64022	0.962784	-
ENSMUSG00000019857_Asf1a	1449.36	1368.37	1448	1359.02	1397.48	1212.89	-0.103645	0.251269	0.911908	-
ENSMUSG00000019861_Gopc	708.917	687.48	664.376	726.917	712.343	597.746	-0.0163084	0.867025	0.987114	-
ENSMUSG00000019863_Qrsl1	573.799	498.188	514.065	541.005	558.187	450.356	-0.0335413	0.789695	0.982106	-
ENSMUSG00000019864_Rtn4ip1	337.794	381.41	387.803	373.684	371.789	389.968	0.0375051	0.70929	0.97056	-
ENSMUSG00000019866_Aim1	67.5588	41.4372	47.0975	33.4642	52.393	70.6241	-0.00390789	0.989535	0.999082	-
ENSMUSG00000019868_Vta1	971.946	951.171	880.824	891.449	836.272	840.324	-0.126877	0.21005	0.911908	-
ENSMUSG00000019873_Reep3	357.611	381.41	506.048	333.713	377.834	485.157	-0.0571026	0.811982	0.98426	-
ENSMUSG00000019877_Serinc1	2560.03	2361.92	2757.71	2372.24	2516.88	2605.93	-0.035107	0.73916	0.973064	-
ENSMUSG00000019878_Hsf2	1063.83	1174.37	1198.48	1227.02	1143.58	1008.18	-0.0234913	0.796588	0.983058	-
ENSMUSG00000019883_Echdc1	599.922	580.12	711.474	659.989	525.945	605.934	-0.076976	0.559708	0.945316	-
ENSMUSG00000019888_Mgat4c	37.8329	43.3207	60.1245	49.2667	26.1965	32.7532	-0.377551	0.290445	0.911908	-
ENSMUSG00000019889_Ptprk	1295.33	1546.36	1324.74	1370.17	1539.55	1239.5	-0.00593454	0.957474	0.996944	-
ENSMUSG00000019891_Dcbld1	913.395	925.744	1098.27	967.673	912.847	975.431	-0.0398033	0.686859	0.968771	-
ENSMUSG00000019894_Slc6a15	50.4439	48.0294	33.0685	42.7598	51.3854	51.1769	0.138218	0.63015	0.961458	-
ENSMUSG00000019897_Ccdc59	1182.73	1221.45	1068.21	1203.78	1200	1120.77	0.0212102	0.776633	0.981434	-
ENSMUSG00000019899_Lama2	24.3212	13.1846	17.0353	11.1547	19.1436	17.4001	-0.201711	0.655542	0.965734	-
ENSMUSG00000019907_Ppp1r12a	3032.04	2990.07	3342.92	3159.58	3153.65	3065.49	0.00229908	0.978661	0.999082	-
ENSMUSG00000019916_P4ha1	1445.76	1143.29	1243.58	1253.98	924.937	1040.94	-0.251139	0.105235	0.911908	-
ENSMUSG00000019917_Sept10	927.808	787.306	960.99	879.365	844.333	741.041	-0.118222	0.359548	0.91642	-
ENSMUSG00000019920_Lims1	2100.63	2091.64	2151.46	1935.35	1926.45	1680.65	-0.194559	0.0420426	0.823143	-
ENSMUSG00000019923_Zwint	3287.86	3024.91	3829.93	3210.7	3035.77	3182.18	-0.10517	0.377433	0.91642	-
ENSMUSG00000019927_Ube2d1	96.3839	105.476	66.137	118.054	134.005	102.354	0.40119	0.105643	0.911908	-
ENSMUSG00000019942_Cdk1	1907.86	1584.03	1648.41	1811.71	1758.19	1250.76	-0.0924976	0.543907	0.942137	-
ENSMUSG00000019943_Atp2b1	1915.07	1914.59	1904.95	1780.11	2058.44	1819.85	-0.0195255	0.807347	0.98406	-
ENSMUSG00000019944_Rhobtb1	55.8486	43.3207	66.137	47.4076	41.3098	50.1533	-0.249456	0.370909	0.91642	-
ENSMUSG00000019947_Arid5b	578.303	788.248	749.552	997.419	1310.83	1510.74	0.851781	0.00012987	0.0409657	A
ENSMUSG00000019948_Actr6	793.591	712.908	832.725	693.453	687.154	684.747	-0.179387	0.127907	0.911908	-
ENSMUSG00000019951_Uhrf1bp1l	1280.91	1510.57	1534.18	1424.09	1492.19	1508.69	0.0331114	0.690968	0.969745	-
ENSMUSG00000019952_Poc1b	97.2847	122.428	126.262	144.082	128.967	141.248	0.26218	0.182271	0.911908	-
ENSMUSG00000019960_Dusp6	3264.44	3988.33	4505.33	3444.02	3944.59	3988.73	-0.047427	0.736997	0.973064	-
ENSMUSG00000019961_Tmpo	10661.7	10297.1	9793.28	10374.8	10135	8845.41	-0.0670475	0.448626	0.926853	-
ENSMUSG00000019966_Kitl	82.8721	79.1073	79.164	72.5058	65.4912	77.7888	-0.160948	0.40474	0.918958	-
ENSMUSG00000019969_Psen1	927.808	870.181	969.007	873.788	945.089	907.878	-0.0211646	0.792092	0.982796	-
ENSMUSG00000019970_Sgk1	5272.29	5527.15	7032.57	7516.43	7693.71	9788.09	0.48739	0.00335967	0.334865	-
ENSMUSG00000019971_Cep290	699.909	701.607	728.509	943.505	968.262	875.124	0.38792	0.0176053	0.664481	-
ENSMUSG00000019975_Ikbip	365.718	360.692	344.714	424.81	371.789	353.12	0.102654	0.495279	0.935767	-
ENSMUSG00000019977_Hbs1l	3559	3004.19	3257.75	3141.92	2967.26	2940.62	-0.117974	0.206991	0.911908	-
ENSMUSG00000019978_Epb4.1l2	1602.49	1609.46	1722.57	1688.08	1728.97	1627.42	0.0321669	0.653003	0.965734	-
ENSMUSG00000019979_Apaf1	2803.24	2634.09	2860.93	2771.02	2611.59	3002.04	0.014933	0.866589	0.986981	-
ENSMUSG00000019982_Myb	19.8172	10.3593	4.0083	22.3095	23.1738	18.4237	0.891983	0.121611	0.911908	-
ENSMUSG00000019984_Med23	1205.25	1283.61	1236.56	1307.89	1438.79	1481.06	0.182195	0.0523308	0.849289	-
ENSMUSG00000019986_Ahi1	598.121	596.13	539.117	625.595	523.93	553.734	-0.0250509	0.838661	0.9853	-
ENSMUSG00000019988_Nedd1	916.998	900.317	949.968	930.491	896.726	807.571	-0.0702243	0.496606	0.936174	-
ENSMUSG00000019989_Enpp3	103.59	123.37	103.214	125.491	170.277	126.919	0.354844	0.0330121	0.78964	-
ENSMUSG00000019992_Fam54a	202.676	216.603	162.336	241.686	214.61	194.472	0.161816	0.304205	0.91227	-
ENSMUSG00000019996_Mtap7	1418.73	1498.33	1611.34	1426.88	1444.84	1388.94	-0.0876302	0.400999	0.918958	-
ENSMUSG00000019997_Ctgf	355.81	455.809	267.554	438.753	584.383	439.098	0.437674	0.081015	0.911908	-
ENSMUSG00000019998_Stx7	548.577	476.527	442.917	486.161	434.257	430.909	-0.119775	0.350563	0.91642	-
ENSMUSG00000020000_Moxd1	79.269	48.0294	70.1453	89.2379	66.4988	58.3416	0.119289	0.637116	0.962307	-
ENSMUSG00000020003_Pex7	605.327	507.605	590.222	570.751	529.975	466.733	-0.119083	0.339431	0.91642	-
ENSMUSG00000020009_Ifngr1	101.789	97.0006	129.268	101.322	95.7179	96.2125	-0.158564	0.383012	0.91642	-
ENSMUSG00000020015_Cdk17	715.223	731.743	860.783	823.591	770.781	908.901	0.117868	0.292123	0.911908	-
ENSMUSG00000020017_Hal	97.2847	75.3403	70.1453	97.6039	94.7104	70.6241	0.114266	0.601762	0.95544	-
ENSMUSG00000020018_Snrpf	1703.38	1731.89	1563.24	1628.59	1557.68	994.878	-0.257402	0.162596	0.911908	-
ENSMUSG00000020019_Ntn4	7.20627	10.3593	12.0249	17.6617	6.04534	15.3531	0.409895	0.464574	0.928648	-
ENSMUSG00000020020_Usp44	330.588	306.07	279.579	305.826	343.577	290.685	0.0357055	0.768353	0.979591	-
ENSMUSG00000020021_Fgd6	172.05	207.186	197.409	204.503	200.504	212.896	0.100525	0.48528	0.934815	-
ENSMUSG00000020022_Ndufa12	1433.15	1108.44	1261.61	1438.03	1138.54	1169.9	-0.0215229	0.890335	0.98939	-
ENSMUSG00000020023_Tmcc3	10.8094	29.1944	16.0332	33.4642	25.1889	14.3295	0.386861	0.424097	0.924187	-
ENSMUSG00000020024_Ccdc41	540.47	522.673	532.102	477.795	502.771	555.781	-0.0551203	0.60051	0.95544	-
ENSMUSG00000020027_Socs2	301.763	311.721	187.388	339.29	383.879	300.92	0.35337	0.0813038	0.911908	-
ENSMUSG00000020029_Nudt4	4474.19	4415.88	4634.6	4217.42	4535.01	4119.74	-0.0712911	0.256889	0.911908	-
ENSMUSG00000020032_Nuak1	1325.95	1731.89	1397.9	1121.05	1423.68	1185.26	-0.256672	0.0591723	0.86066	-
ENSMUSG00000020034_Tcp11l2	140.522	132.787	121.251	146.871	113.854	122.824	-0.0399428	0.812271	0.98426	-
ENSMUSG00000020038_Cry1	2279.88	2184.87	2283.73	2104.53	2134.01	2125.89	-0.0845618	0.161584	0.911908	-
ENSMUSG00000020042_Btbd11	745.849	819.326	600.243	791.986	884.635	675.535	0.118969	0.420523	0.923997	-
ENSMUSG00000020044_Timp3	153.133	207.186	183.38	161.744	220.655	202.66	0.105138	0.571979	0.948003	-
ENSMUSG00000020048_Hsp90b1	16228.5	15067.1	14222.5	15990.3	15259.5	12700.1	-0.0505747	0.685406	0.968738	-
ENSMUSG00000020056_Ccdc53	556.685	579.179	651.349	557.737	529.975	468.78	-0.198279	0.123932	0.911908	-
ENSMUSG00000020057_Dram1	23.4204	22.6021	9.01868	19.5208	11.0831	6.14122	-0.579497	0.32215	0.91642	-
ENSMUSG00000020059_Sycp3	509.844	373.876	797.652	461.062	387.909	573.181	-0.241221	0.393137	0.916777	-
ENSMUSG00000020061_Mybpc1	43.2376	32.0196	21.0436	18.5912	31.2343	19.4472	-0.484297	0.170714	0.911908	-
ENSMUSG00000020063_Sirt1	2579.85	2716.96	2597.38	3132.62	3302.77	3165.8	0.28234	2.90872e-06	0.00191482	A
ENSMUSG00000020064_Herc4	7287.34	6677.98	7471.47	6678.9	6253.91	6895.57	-0.112494	0.174173	0.911908	-
ENSMUSG00000020067_Mypn	111.697	74.3985	100.208	91.097	101.763	100.307	0.0324396	0.870135	0.987446	-
ENSMUSG00000020068_Pbld2	36.9321	16.9516	31.0643	17.6617	23.1738	19.4472	-0.498235	0.17526	0.911908	-
ENSMUSG00000020069_Hnrnph3	471.11	492.537	567.175	459.203	504.786	574.204	0.00692589	0.970698	0.999082	-
ENSMUSG00000020070_Rufy2	860.249	839.103	892.849	893.308	844.333	1221.08	0.190587	0.254906	0.911908	-
ENSMUSG00000020074_Ccar1	1797.96	2286.58	1718.56	1893.52	2409.07	1823.94	0.0781475	0.632369	0.961478	-
ENSMUSG00000020075_Ddx21	14545	15411.8	13713.4	15101.7	15512.3	12780.9	-0.00911451	0.932612	0.995106	-
ENSMUSG00000020076_Ddx50	2424.91	2230.07	2201.56	2198.41	2193.45	1935.51	-0.11587	0.351165	0.91642	-
ENSMUSG00000020077_Srgn	121.606	80.0491	40.083	77.1536	38.2872	49.1298	-0.55499	0.155844	0.911908	-
ENSMUSG00000020078_Vps26a	2144.77	1853.37	1848.83	1881.43	1794.46	1537.35	-0.165475	0.266339	0.911908	-
ENSMUSG00000020079_Supv3l1	1153.9	1189.44	1066.21	1226.09	1112.34	1008.18	-0.0265738	0.788922	0.982039	-
ENSMUSG00000020080_Hkdc1	27.0235	16.9516	6.01245	16.7321	17.1285	9.21184	-0.221389	0.669757	0.96667	-
ENSMUSG00000020083_2010107G23Rik	263.93	209.069	233.484	269.573	227.708	187.307	-0.0446754	0.834524	0.9853	-
ENSMUSG00000020085_Aifm2	380.131	335.264	422.876	330.924	319.396	399.18	-0.117152	0.381321	0.91642	-
ENSMUSG00000020086_H2afy2	553.081	441.683	401.832	538.216	475.567	305.014	-0.0824109	0.675855	0.96667	-
ENSMUSG00000020087_Tysnd1	727.833	776.947	600.243	766.888	735.517	600.816	-0.0012758	0.991609	0.999082	-
ENSMUSG00000020088_Sar1a	4900.27	4123	5029.42	4444.23	4070.53	4355.15	-0.126797	0.324258	0.91642	-
ENSMUSG00000020089_Ppa1	5118.25	4184.21	4146.59	4612.48	4183.38	3242.57	-0.159831	0.388658	0.91642	-
ENSMUSG00000020091_Eif4ebp2	302.663	417.197	314.652	390.416	409.068	449.333	0.271303	0.137283	0.911908	-
ENSMUSG00000020092_X99384	3804.01	3828.23	3805.88	3537.91	3573.81	3495.38	-0.108811	0.0918341	0.911908	-
ENSMUSG00000020097_Sgpl1	3018.53	2917.55	2897	2774.74	2894.71	2888.42	-0.0459498	0.437549	0.925726	-
ENSMUSG00000020098_Pcbd1	45.94	21.6603	39.0809	42.7598	34.2569	42.9886	0.169279	0.568839	0.948003	-
ENSMUSG00000020099_Unc5b	1255.69	1214.86	1418.94	1034.6	910.832	1128.96	-0.339103	0.00989419	0.529071	-
ENSMUSG00000020100_Slc29a3	172.951	253.332	210.436	242.615	322.418	282.496	0.412473	0.0250514	0.726015	-
ENSMUSG00000020101_4632428N05Rik	116.201	90.4084	51.1058	125.491	88.665	46.0592	0.0140492	0.974423	0.999082	-
ENSMUSG00000020105_Lrig3	387.337	372.935	289.6	515.907	486.65	379.732	0.396479	0.0151535	0.630325	-
ENSMUSG00000020107_Anapc16	502.637	420.022	404.838	489.879	453.401	411.462	0.0290291	0.814817	0.98426	-
ENSMUSG00000020108_Ddit4	1374.6	1348.59	1344.79	1220.51	1190.93	996.925	-0.254958	0.0362225	0.80582	-
ENSMUSG00000020109_Dnajb12	519.752	640.393	636.318	687.875	656.927	699.076	0.186864	0.124087	0.911908	-
ENSMUSG00000020111_Micu1	391.841	423.789	486.007	444.33	427.204	414.533	-0.0151972	0.881768	0.989266	-
ENSMUSG00000020114_Cand1	8442.15	8456.01	8074.72	8862.44	8516.88	8070.59	0.0273222	0.72573	0.972048	-
ENSMUSG00000020115_Tbk1	852.142	798.607	815.689	811.507	735.517	796.312	-0.0737891	0.443693	0.926743	-
ENSMUSG00000020116_Pno1	3517.56	3185.95	3237.71	3445.88	3140.56	2576.24	-0.11756	0.417142	0.923499	-
ENSMUSG00000020121_Srgap1	81.0706	134.671	164.34	106.9	158.186	258.955	0.463575	0.170394	0.911908	-
ENSMUSG00000020122_Egfr	79.269	67.8063	70.1453	94.8153	103.778	96.2125	0.438744	0.022056	0.692849	-
ENSMUSG00000020124_Usp15	2773.51	2534.26	2742.68	2607.42	2575.32	2407.36	-0.0848477	0.338086	0.91642	-
ENSMUSG00000020128_Vps54	2356.45	2341.2	2634.46	2294.16	2433.25	2810.63	0.0398935	0.676346	0.96667	-
ENSMUSG00000020130_Tbc1d15	1187.23	1166.83	1162.41	1245.61	1177.83	1255.88	0.0652962	0.459144	0.926853	-
ENSMUSG00000020132_Rab21	1089.05	884.307	886.837	1017.87	810.076	793.241	-0.1257	0.375413	0.91642	-
ENSMUSG00000020133_2310011J03Rik	568.395	566.936	543.125	603.285	627.708	453.427	0.00564652	0.96256	0.998164	-
ENSMUSG00000020134_Peli1	962.037	976.599	1211.51	988.124	1062.97	1103.37	0.00234848	0.983203	0.999082	-
ENSMUSG00000020135_Apc2	204.478	188.351	130.27	158.025	180.353	207.778	0.0602556	0.815206	0.98426	-
ENSMUSG00000020137_Thap2	123.407	119.603	104.216	158.025	100.756	107.471	0.078764	0.719823	0.971295	-
ENSMUSG00000020142_Slc1a4	244.112	282.526	225.467	252.841	237.783	249.743	-0.0230644	0.878789	0.989266	-
ENSMUSG00000020143_Dock2	47.7416	47.0877	40.083	39.9711	33.2494	37.8709	-0.280746	0.32322	0.91642	-
ENSMUSG00000020149_Rab1	5318.23	4788.82	4617.56	5266.89	5000.51	4354.13	-0.0101258	0.93432	0.995106	-
ENSMUSG00000020150_Gamt	30.6267	32.9614	30.0623	33.4642	32.2418	34.8003	0.101628	0.789744	0.982106	-
ENSMUSG00000020152_Actr2	6588.33	6257.95	6409.27	6343.33	6249.88	5434.98	-0.0949711	0.356362	0.91642	-
ENSMUSG00000020153_Ndufs7	743.147	787.306	676.401	707.396	734.509	590.581	-0.118707	0.328722	0.91642	-
ENSMUSG00000020154_Ptprb	8.10706	13.1846	21.0436	15.8025	10.0756	21.4943	0.16799	0.773212	0.980808	-
ENSMUSG00000020156_Mum1	1486.29	1434.29	1365.83	1436.17	1555.67	1512.79	0.0713128	0.49702	0.936174	-
ENSMUSG00000020159_Gabrp	9.00784	14.1263	8.0166	8.36605	16.1209	18.4237	0.453405	0.382643	0.91642	-
ENSMUSG00000020160_Meis1	11.7102	9.41754	13.027	20.4503	12.0907	9.21184	0.300282	0.539131	0.941568	-
ENSMUSG00000020163_Uqcr11	3483.33	2932.62	2978.17	3343.63	3016.63	2374.61	-0.1049	0.494813	0.935767	-
ENSMUSG00000020166_Cnot2	2422.21	2489.06	2620.43	2465.2	2516.88	2290.68	-0.0501089	0.462354	0.927736	-
ENSMUSG00000020167_Tcf3	1435.85	1644.3	1283.66	1585.83	1578.84	1426.81	0.0732865	0.550662	0.942418	-
ENSMUSG00000020170_Frs2	716.123	843.811	854.77	840.323	857.431	966.219	0.141876	0.293427	0.911908	-
ENSMUSG00000020171_Yeats4	1589.88	1398.5	1432.97	1625.8	1376.32	1221.08	-0.065912	0.631438	0.961478	-
ENSMUSG00000020173_Cobl	1762.83	2250.79	1980.1	2530.27	2758.69	2675.53	0.410149	0.005352	0.420599	-
ENSMUSG00000020175_Rab36	9.90862	20.7186	20.0415	26.9573	17.1285	18.4237	0.312238	0.492316	0.935767	-
ENSMUSG00000020176_Grb10	6421.69	9532.43	7269.06	6884.33	9398.49	6918.09	-0.00139246	0.994019	0.999082	-
ENSMUSG00000020180_Snrpd3	829.622	1061.36	839.739	932.35	1019.65	627.428	-0.0820123	0.662584	0.966181	-
ENSMUSG00000020181_Nav3	16.2141	14.1263	12.0249	14.873	26.1965	4.09415	0.0917931	0.895673	0.989609	-
ENSMUSG00000020182_Ddc	390.94	258.982	209.434	382.05	275.063	182.19	-0.0339692	0.909226	0.990965	-
ENSMUSG00000020183_Cpm	117.102	104.535	83.1723	71.5762	84.6348	90.0713	-0.31224	0.140097	0.911908	-
ENSMUSG00000020184_Mdm2	8212.45	8757.37	9412.49	7884.54	7787.41	7561.89	-0.183239	0.0236222	0.709593	-
ENSMUSG00000020185_E2f7	281.045	468.052	262.544	331.853	462.469	406.344	0.246471	0.284773	0.911908	-
ENSMUSG00000020186_Csrp2	3045.55	2883.65	3070.36	3158.65	2986.4	2593.64	-0.0422634	0.699653	0.969793	-
ENSMUSG00000020189_Osbpl8	1942.09	1774.26	1986.11	1774.53	1639.3	1731.83	-0.148065	0.132866	0.911908	-
ENSMUSG00000020190_Mknk2	999.87	1130.1	966.001	1097.81	1171.79	1029.68	0.0916969	0.502663	0.93752	-
ENSMUSG00000020193_Zpbp	32.4282	16.0098	39.0809	26.9573	30.2267	29.6826	-0.00893141	0.979417	0.999082	-
ENSMUSG00000020196_Cabin1	1886.24	2231.96	2185.53	2083.15	2230.73	3125.88	0.239005	0.286207	0.911908	-
ENSMUSG00000020198_Ap3d1	2218.63	2546.5	2111.37	2417.79	2644.84	2186.28	0.0760486	0.531724	0.941169	-
ENSMUSG00000020205_Phlda1	206.28	242.972	432.897	237.968	233.753	540.428	0.198429	0.705644	0.970024	-
ENSMUSG00000020211_Sf3a2	289.152	413.43	292.606	400.641	458.438	484.133	0.432137	0.021146	0.687615	-
ENSMUSG00000020212_Mdm1	351.306	385.177	309.641	347.656	343.577	309.108	-0.0647784	0.655937	0.965734	-
ENSMUSG00000020219_Timm13	2360.95	1960.73	2135.42	2215.14	2145.09	1626.4	-0.109012	0.426747	0.924814	-
ENSMUSG00000020220_Vps13d	2928.45	3267.89	3545.34	2943.92	3408.57	4468.76	0.15158	0.387566	0.91642	-
ENSMUSG00000020224_Llph	1646.63	1431.47	1468.04	1380.4	1468.01	1207.77	-0.164575	0.160103	0.911908	-
ENSMUSG00000020225_Tmbim4	516.149	446.391	516.069	470.358	420.151	453.427	-0.137401	0.303129	0.91227	-
ENSMUSG00000020226_Slc5a4b	51.3447	47.0877	51.1058	42.7598	34.2569	17.4001	-0.657618	0.0587548	0.86066	-
ENSMUSG00000020227_Irak3	190.065	215.662	158.328	203.574	232.746	219.037	0.214831	0.228202	0.911908	-
ENSMUSG00000020228_Helb	1654.74	1718.7	1706.53	1870.28	1832.75	1656.08	0.0776349	0.27683	0.911908	-
ENSMUSG00000020230_Prmt2	269.334	216.603	223.463	253.77	222.67	164.79	-0.144994	0.469855	0.929908	-
ENSMUSG00000020231_Dip2a	335.992	341.857	387.803	335.572	328.464	360.285	-0.0562335	0.61377	0.958643	-
ENSMUSG00000020232_Hmg20b	430.575	514.198	508.052	469.428	473.552	476.968	-0.0322614	0.77151	0.980006	-
ENSMUSG00000020234_4930404N11Rik	83.7729	111.127	115.239	74.3649	51.3854	66.5299	-0.687724	0.0386577	0.822051	-
ENSMUSG00000020235_Fzr1	809.805	834.394	794.646	726.917	848.363	802.453	-0.0371271	0.742492	0.97364	-
ENSMUSG00000020238_Ncln	1369.19	1411.69	1236.56	1561.66	1413.6	1568.06	0.177334	0.133772	0.911908	-
ENSMUSG00000020241_Col6a2	16.2141	11.301	10.0208	11.1547	14.1058	27.6355	0.482607	0.307456	0.91276	-
ENSMUSG00000020246_Hcfc2	244.112	258.982	245.508	249.122	255.92	294.779	0.0946867	0.522682	0.939947	-
ENSMUSG00000020248_Nfyb	2302.4	1905.17	2246.65	2202.13	1832.75	1873.07	-0.127347	0.279747	0.911908	-
ENSMUSG00000020250_Txnrd1	10219.4	9598.35	12129.1	9943.52	9617.13	10185.2	-0.102939	0.373815	0.91642	-
ENSMUSG00000020251_Glt8d2	27.0235	29.1944	27.056	35.3233	19.1436	51.1769	0.34222	0.354861	0.91642	-
ENSMUSG00000020253_Ppm1m	581.006	633.8	574.189	625.595	647.859	538.381	0.0186128	0.864436	0.986769	-
ENSMUSG00000020255_D10Wsu102e	2790.63	2725.44	2845.89	2747.78	2851.39	3070.61	0.0519627	0.428757	0.925068	-
ENSMUSG00000020256_Aldh1l2	67.5588	58.3887	98.2034	31.6051	77.5819	138.178	0.140472	0.728125	0.972048	-
ENSMUSG00000020257_Wdr82	5102.94	5092.06	4939.23	5246.44	5060.96	4419.63	-0.0392097	0.585016	0.950093	-
ENSMUSG00000020258_Glyctk	70.2612	77.2238	81.1681	93.8857	82.6197	115.66	0.354138	0.0595306	0.861713	-
ENSMUSG00000020260_Pofut2	717.024	741.16	702.455	672.073	659.95	766.63	-0.0427974	0.606911	0.956754	-
ENSMUSG00000020261_Slc36a1	295.457	371.993	355.737	302.107	311.335	483.11	0.0995283	0.652045	0.965734	-
ENSMUSG00000020262_Adarb1	180.157	191.176	182.378	184.983	214.61	153.531	-0.0010531	0.994563	0.999082	-
ENSMUSG00000020263_Appl2	375.627	369.167	413.857	336.501	323.426	465.71	-0.0422176	0.779834	0.981434	-
ENSMUSG00000020265_Sumo3	3999.48	3653.06	3460.17	3726.61	3558.69	2727.73	-0.150288	0.340885	0.91642	-
ENSMUSG00000020267_Hint1	3292.37	2918.5	2680.55	3116.82	2889.67	2251.78	-0.106541	0.525924	0.941169	-
ENSMUSG00000020268_Lyrm7	55.8486	62.1558	61.1266	53.9146	43.325	41.965	-0.358807	0.102196	0.911908	-
ENSMUSG00000020271_Fbxw11	2679.83	2524.84	3006.23	2749.64	2393.96	2480.03	-0.106665	0.251519	0.911908	-
ENSMUSG00000020272_Stk10	396.345	362.575	302.627	337.431	374.811	312.179	-0.0525917	0.712064	0.97056	-
ENSMUSG00000020273_Papolg	778.277	733.626	867.797	753.874	735.517	768.677	-0.0751702	0.453578	0.926853	-
ENSMUSG00000020275_Rel	27.9243	36.7284	15.0311	27.8868	30.2267	29.6826	0.136049	0.764298	0.979127	-
ENSMUSG00000020277_Pfkl	5944.27	4516.65	5513.42	5321.74	4200.51	4780.94	-0.159352	0.173007	0.911908	-
ENSMUSG00000020280_Pus10	1740.31	1439.94	1640.4	1703.89	1524.43	1436.02	-0.0472774	0.639466	0.962323	-
ENSMUSG00000020282_Rhbdf1	422.468	539.625	608.26	324.417	376.826	556.804	-0.320076	0.252356	0.911908	-
ENSMUSG00000020283_Pex13	997.168	1024.63	966.001	1112.68	1096.22	888.43	0.0523585	0.600679	0.95544	-
ENSMUSG00000020284_1810043G02Rik	192.768	185.525	178.369	230.531	201.511	183.213	0.145591	0.298777	0.91193	-
ENSMUSG00000020287_Mpg	372.024	306.07	313.65	324.417	287.154	362.332	-0.0273184	0.839714	0.9853	-
ENSMUSG00000020288_Ahsa2	1326.85	1215.8	1247.58	1216.8	1317.88	1095.19	-0.0624241	0.501427	0.93752	-
ENSMUSG00000020289_Nprl3	261.227	357.866	295.612	377.402	339.547	369.497	0.248695	0.160584	0.911908	-
ENSMUSG00000020290_Xpo1	19472.2	17661.7	18637.6	18924	17953.7	16972.3	-0.0505682	0.587998	0.951647	-
ENSMUSG00000020297_Nsg2	29.7259	36.7284	37.0768	34.3938	25.1889	17.4001	-0.417695	0.188067	0.911908	-
ENSMUSG00000020300_Cpeb4	998.969	949.288	1084.25	941.646	942.066	1225.17	0.035737	0.807446	0.98406	-
ENSMUSG00000020303_Stc2	103.59	88.5249	69.1432	102.252	126.952	77.7888	0.230778	0.366637	0.91642	-
ENSMUSG00000020305_Asb3	403.551	350.332	354.735	370.895	321.411	318.32	-0.133216	0.342701	0.91642	-
ENSMUSG00000020307_Cdc34	5260.58	5263.46	4543.41	5531.82	4973.3	4016.36	-0.0531921	0.676775	0.96667	-
ENSMUSG00000020308_Gm16517	272.938	254.274	222.461	228.672	276.071	202.66	-0.0850888	0.556326	0.943485	-
ENSMUSG00000020309_Chac2	145.927	130.904	136.282	135.716	117.884	141.248	-0.0655956	0.674679	0.96667	-
ENSMUSG00000020311_Erlec1	199.974	174.224	211.438	223.095	191.436	318.32	0.323131	0.143272	0.911908	-
ENSMUSG00000020312_Shc2	150.431	169.516	101.21	127.35	153.149	84.9536	-0.205368	0.441405	0.926179	-
ENSMUSG00000020315_Spnb2	6574.82	6781.57	6851.19	7355.62	7420.66	8145.31	0.181771	0.00320642	0.332523	-
ENSMUSG00000020319_Wdpcp	81.0706	79.1073	79.164	72.5058	69.5214	69.6005	-0.177221	0.360654	0.91642	-
ENSMUSG00000020321_Mdh1	5134.47	4459.2	4649.63	4839.3	4441.31	3600.8	-0.144931	0.315466	0.915935	-
ENSMUSG00000020325_Fstl3	18.9165	22.6021	22.0457	7.43649	18.136	21.4943	-0.440076	0.38762	0.91642	-
ENSMUSG00000020326_Ccng1	16023.1	14758.2	15234.6	15558.1	14642.8	13310.1	-0.0807351	0.461862	0.927736	-
ENSMUSG00000020328_Nudcd2	4045.42	3164.29	3770.81	3668.98	3237.28	2738.99	-0.186958	0.220982	0.911908	-
ENSMUSG00000020329_Polrmt	892.677	887.132	772.6	871.928	962.217	1058.34	0.179708	0.161027	0.911908	-
ENSMUSG00000020330_Hmmr	6836.95	6008.39	6035.5	7024.69	6111.84	5460.57	-0.0218002	0.860685	0.986427	-
ENSMUSG00000020331_Hcn2	156.736	204.361	216.448	140.364	162.217	202.66	-0.193156	0.413534	0.920917	-
ENSMUSG00000020333_Acsl6	256.723	194.943	262.544	241.686	198.489	297.849	0.0471739	0.791526	0.982756	-
ENSMUSG00000020335_Zfp354b	27.9243	32.0196	24.0498	27.8868	28.2116	21.4943	-0.114246	0.801698	0.98406	-
ENSMUSG00000020340_Cyfip2	253.12	315.488	319.662	290.953	313.35	299.896	0.0268893	0.825522	0.9853	-
ENSMUSG00000020346_Mgat1	790.888	710.082	821.702	693.453	714.358	726.712	-0.121844	0.203084	0.911908	-
ENSMUSG00000020349_Ppp2ca	10894.1	9898.77	10934.6	10516.1	9942.57	9015.32	-0.106217	0.20541	0.911908	-
ENSMUSG00000020354_Sgcd	58.551	65.9228	81.1681	53.9146	38.2872	78.8124	-0.265429	0.377193	0.91642	-
ENSMUSG00000020357_Flt4	47.7416	66.8645	80.166	71.5762	61.461	90.0713	0.198093	0.515387	0.939619	-
ENSMUSG00000020358_Hnrnpab	17293.3	17373.5	17367	18083.7	17457.9	14146.3	-0.0665053	0.474292	0.930641	-
ENSMUSG00000020359_Agxt2l2	654.87	899.375	819.698	779.902	982.368	1342.88	0.387244	0.106881	0.911908	-
ENSMUSG00000020361_Hspa4	23451.9	20936.1	20901.3	23436.1	21637.3	17464.6	-0.062099	0.61205	0.958084	-
ENSMUSG00000020362_Cnot6	2542.91	2554.04	2599.38	2475.42	2507.81	3138.17	0.0773853	0.470771	0.93042	-
ENSMUSG00000020363_Gfpt2	2238.45	2332.72	2080.31	2191.91	2248.87	1965.19	-0.0542779	0.6015	0.95544	-
ENSMUSG00000020364_Zfp354a	199.073	135.613	148.307	158.025	155.164	148.413	-0.066907	0.707031	0.97056	-
ENSMUSG00000020366_Mapk9	977.351	1043.46	993.057	1018.8	993.451	950.866	-0.0241512	0.767893	0.979591	-
ENSMUSG00000020368_Canx	20519	18653.3	20683.8	19841.5	18979.4	19090	-0.0476476	0.556947	0.943609	-
ENSMUSG00000020372_Gnb2l1	49246.8	42327.1	48974.4	45705.6	40988.4	40511.6	-0.143894	0.198917	0.911908	-
ENSMUSG00000020375_Rufy1	222.494	205.302	175.363	194.278	227.708	142.272	-0.0966514	0.619898	0.959615	-
ENSMUSG00000020376_Rnf130	127.011	113.01	153.318	152.448	125.945	143.295	0.102721	0.598185	0.954973	-
ENSMUSG00000020380_Rad50	1931.28	2261.15	1752.63	2140.78	2087.66	1675.53	-0.00993631	0.937588	0.995612	-
ENSMUSG00000020381_3010026O09Rik	133.316	120.544	86.1785	135.716	115.869	84.9536	-0.015015	0.959105	0.996944	-
ENSMUSG00000020385_Clk4	1304.34	1238.41	1308.71	1293.95	1296.73	1413.51	0.0559943	0.619264	0.959615	-
ENSMUSG00000020386_Sar1b	1051.21	937.987	1127.33	989.983	870.529	854.654	-0.198344	0.118147	0.911908	-
ENSMUSG00000020387_Phf15	891.776	1171.54	936.941	924.913	1024.69	850.56	-0.0995435	0.545087	0.942187	-
ENSMUSG00000020388_Pdlim4	29.7259	22.6021	22.0457	13.0139	23.1738	20.4707	-0.40194	0.277384	0.911908	-
ENSMUSG00000020389_Cdkl3	154.034	179.875	163.338	163.603	167.254	187.307	0.0589146	0.704369	0.969793	-
ENSMUSG00000020390_Ube2b	973.748	884.307	1077.23	899.815	853.401	966.219	-0.110003	0.389162	0.91642	-
ENSMUSG00000020392_Cdkn2aipnl	1831.29	1757.31	1698.52	1848.9	1709.82	1473.89	-0.0709979	0.550209	0.942416	-
ENSMUSG00000020393_Kremen1	409.857	460.518	477.99	466.64	393.955	487.204	0.00031559	0.99793	0.999768	-
ENSMUSG00000020396_Nefh	552.181	753.403	340.706	718.551	786.902	381.779	0.197	0.638166	0.962307	-
ENSMUSG00000020397_Med7	778.277	867.355	880.824	748.297	781.864	819.853	-0.104318	0.267475	0.911908	-
ENSMUSG00000020400_Tnip1	886.371	1100.91	955.98	828.239	1012.59	855.677	-0.12642	0.410635	0.920517	-
ENSMUSG00000020402_Vdac1	14077.5	13152.5	13414.8	13155.2	12354.7	10774.8	-0.163681	0.125859	0.911908	-
ENSMUSG00000020407_Upp1	4161.62	3130.39	3543.34	3719.17	3052.9	2734.89	-0.188622	0.26881	0.911908	-
ENSMUSG00000020409_Slu7	1438.55	1277.96	1263.62	1266.99	1192.95	1118.73	-0.153389	0.133975	0.911908	-
ENSMUSG00000020411_Nipal4	12.611	18.8351	22.0457	17.6617	13.0982	15.3531	-0.203124	0.586076	0.950744	-
ENSMUSG00000020412_Ascc2	571.998	730.801	601.245	720.41	789.925	744.112	0.24362	0.0916147	0.911908	-
ENSMUSG00000020413_Hus1	1222.36	1220.51	1185.46	1279.08	1275.57	1111.56	0.0153137	0.838241	0.9853	-
ENSMUSG00000020415_Pttg1	2205.12	2041.72	2740.68	2089.65	2079.6	2386.89	-0.0918224	0.513853	0.938536	-
ENSMUSG00000020419_Hormad2	353.107	274.05	346.718	343.938	294.207	319.344	-0.0240722	0.894714	0.989609	-
ENSMUSG00000020420_Zfp607	103.59	101.709	165.342	131.998	117.884	163.766	0.161173	0.423484	0.924187	-
ENSMUSG00000020422_Tns3	2619.48	3576.78	2214.59	3083.35	3858.94	2879.21	0.223611	0.234038	0.911908	-
ENSMUSG00000020423_Btg2	12384	11415.9	12959.8	8376.28	7946.6	7796.28	-0.607904	6.08889e-09	1.02435e-05	R
ENSMUSG00000020424_Gatsl3	347.703	291.944	239.496	360.67	293.199	215.966	-0.0150854	0.939191	0.995612	-
[truncated: 13,144 more rows]
